# Supplementary material for: Discovery and Validation of Circulating Biomarkers of Colorectal Adenoma by High-Depth Small RNA Sequencing
Source: Oxford University Press journal article supplement (doi:10.1158/1078-0432.ccr-17-1960), 2018-02-28
Supplement: 10780432ccr171960-sup-186016_3_supp_4558847_p4zn82.xlsx [file 10780432ccr171960-sup-186016_3_supp_4558847_p4zn82.xlsx]

## Sheet: Sheet1
Supplementary Table 3. Fragment level information, annotation, and DESeq2 regression results.
parent_feature	feature	seq	TA	len	row_sum	strand	rsq_cross	conserv_cross_rsq	low_any_seq_rsq	annot	deseq_feature	baseMean	log2FoldChange	lfcSE	stat	pvalue	padj	sex_pval	sex_log2fc	race_pval	race_log2fc	age_pval	age_log2fc
chr1_564868_565284	chr1_564925_564950	CGTGCCACCTATCACACCCCATCCTA	2	26	10613	minus	0.524901	0.524901	0.524901	chr1_564925_564950	chr1_564925_564950	51.0352	-0.0811167	0.173869	0.218114	0.640481	0.863533	0.077437	-0.287547	0.901684	0.0203931	0.565876	-0.00438822
chr1_564868_565284	chr1_564926_564950	GTGCCACCTATCACACCCCATCCTA	2	25	24008	minus	0.268133	0.268133	0.268133	chr1_564926_564950	chr1_564926_564950	115.487	0.161025	0.165439	0.932488	0.334217	0.693747	0.0211161	-0.357386	0.993331	-0.00128017	0.233777	-0.00864115
chr1_564868_565284	chr1_564927_564950	TGCCACCTATCACACCCCATCCTA	2	24	12073	minus	0.202497	0.202497	0.202497	chr1_564927_564950	chr1_564927_564950	58.3479	-0.0998026	0.184463	0.287096	0.592087	0.846008	0.0742174	-0.308343	0.902071	0.0216502	0.676333	-0.00333059
chr1_564868_565284	chr1_564928_564950	GCCACCTATCACACCCCATCCTA	2	23	153205	minus	0.220148	0.220148	0.220148	chr1_564928_564950	chr1_564928_564950	659.105	0.316255	0.266751	1.40065	0.236614	0.605383	0.0122859	-0.638064	0.14016	-0.37306	0.00304767	-0.0375538
chr1_564868_565284	chr1_564929_564950	CCACCTATCACACCCCATCCTA	2	22	23082	minus	0.496233	0.496233	0.496233	chr1_564929_564950	chr1_564929_564950	111.965	0.0847779	0.167586	0.244136	0.621235	0.855582	0.0298901	-0.342011	0.564217	-0.0923473	0.622567	-0.00361275
chr1_564868_565284	chr1_564930_564950	CACCTATCACACCCCATCCTA	2	21	173899	minus	0.731276	0.731276	0.731276	chr1_564930_564950	chr1_564930_564950	859.374	0.0776477	0.186864	0.167372	0.682458	0.887168	0.0013879	-0.56072	0.352275	-0.166321	0.913725	-0.000900817
chr1_564868_565284	chr1_564931_564950	ACCTATCACACCCCATCCTA	2	20	31553	minus	0.764612	0.764612	0.764612	chr1_564931_564950	chr1_564931_564950	155.068	-0.063081	0.194033	0.104152	0.746903	0.91553	0.00144581	-0.582083	0.831926	0.0396855	0.894791	0.00111224
chr1_564868_565284	chr1_564932_564950	CCTATCACACCCCATCCTA	2	19	43706	minus	0.655332	0.655332	0.655332	chr1_564932_564950	chr1_564932_564950	210.838	0.150215	0.159105	0.876836	0.34907	0.70912	0.00134241	-0.485785	0.510845	0.100393	0.200878	-0.00883672
chr1_564868_565284	chr1_564933_564950	CTATCACACCCCATCCTA	2	18	12028	minus	0.660223	0.660223	0.660223	chr1_564933_564950	chr1_564933_564950	57.1883	0.0256094	0.194738	0.0176005	0.894457	0.969362	0.000472572	-0.654669	0.11923	0.295187	0.488313	-0.00580734
chr1_564868_565284	chr1_564952_564969	AGTAAGGTCAGCTAAATA	14	18	11832	minus	NA	0.359207	Inf	chr1_564952_564969	chr1_564952_564969	55.7297	-0.276016	0.188116	2.21694	0.136503	0.477416	0.145977	-0.262586	0.405598	0.151703	0.159907	-0.0114148
chr1_564868_565284	chr1_564952_564971	AGTAAGGTCAGCTAAATAAG	14	20	46810	minus	0.555725	0.479674	0.555725	chr1_564952_564971	chr1_564952_564971	229.855	-0.031116	0.149977	0.0426023	0.836476	0.948994	0.124007	-0.21704	0.803681	-0.035466	0.237062	-0.00785508
chr1_564868_565284	chr1_564952_564972	AGTAAGGTCAGCTAAATAAGC	14	21	19348	minus	0.541094	0.49125	0.541094	chr1_564952_564972	chr1_564952_564972	94.724	-0.250645	0.168735	2.14746	0.142806	0.484155	0.494205	-0.108613	0.665771	-0.0698301	0.355958	-0.0067711
chr1_564868_565284	chr1_564952_564973	AGTAAGGTCAGCTAAATAAGCT	14	22	13290	minus	0.436776	0.474918	0.436776	chr1_564952_564973	chr1_564952_564973	65.3643	-0.374143	0.168451	4.86494	0.0274078	0.212281	0.427751	-0.125501	0.801253	-0.0403113	0.847116	-0.00142721
chr1_564868_565284	chr1_564952_564974	AGTAAGGTCAGCTAAATAAGCTA	12	23	34260	minus	0.407496	0.40876	0.407496	chr1_564952_564974	chr1_564952_564974	162.422	-0.0146757	0.175342	0.00665119	0.935001	0.978699	0.181044	-0.21854	0.975189	-0.00516673	0.30046	-0.00810937
chr1_565591_566376	chr1_566074_566096	TAAATACAGACCAAGAGCCTTCA	2	23	4803	minus	1	1	1	chr1_566074_566096	chr1_566074_566096	23.339	-0.0552132	0.198804	0.0741393	0.785403	0.929063	0.257919	0.208532	0.535132	-0.116497	0.60063	-0.0049331
chr1_565591_566376	chr1_566181_566205	GCCACTTTAATTAAGCTAAGCCCTT	5	25	3514	minus	0.265478	0.265478	0.265478	chr1_566181_566205	chr1_566181_566205	17.0992	-0.111746	0.217285	0.260272	0.609933	0.853531	0.185644	-0.269411	0.878438	0.0315682	0.954446	0.000543997
chr1_565591_566376	chr1_566182_566205	CCACTTTAATTAAGCTAAGCCCTT	8	24	3750	minus	0.265478	0.265478	0.265478	chr1_566182_566205	chr1_566182_566205	18.3462	-0.115675	0.217868	0.291044	0.589552	0.845083	0.243803	-0.237478	0.245637	0.241992	0.784403	0.00250047
chr1_565591_566376	chr1_566224_566245	AAACCCACAAACACTTAGTTAA	2	22	5177	minus	1	1	1	chr1_566224_566245	chr1_566224_566245	25.7891	-0.353394	0.231497	2.22542	0.135755	0.476361	0.0595666	-0.408101	0.00216442	-0.693046	0.69384	0.00407719
chr1_565591_566376	chr1_566257_566279	CCTAATCAACTGGCTTCAATCTA	17	23	6059	minus	0.247855	0.247855	0.247855	chr1_566257_566279	chr1_566257_566279	29.7115	-0.158645	0.187077	0.713431	0.398307	0.739391	0.0707198	-0.318636	0.725283	0.0626318	0.713011	-0.0029393
chr1_565591_566376	chr1_566258_566279	CTAATCAACTGGCTTCAATCTA	18	22	11389	minus	0.291489	0.291489	0.291489	chr1_566258_566279	chr1_566258_566279	56.0196	0.0928446	0.179926	0.248987	0.61779	0.854963	0.0420029	-0.340297	0.677706	0.0714829	0.95996	0.000412669
chr1_565591_566376	chr1_566259_566279	TAATCAACTGGCTTCAATCTA	19	21	9693	minus	0.324336	0.324336	0.324336	chr1_566259_566279	chr1_566259_566279	47.403	0.061298	0.174422	0.118338	0.730844	0.906869	0.0105438	-0.416898	0.891342	0.02276	0.94827	0.000497249
chr1_565591_566376	chr1_566260_566279	AATCAACTGGCTTCAATCTA	19	20	3919	minus	0.2642	0.2642	0.2642	chr1_566260_566279	chr1_566260_566279	19.0313	-0.33564	0.218396	2.33002	0.1269	0.461104	0.0384348	-0.427809	0.994196	-0.00149016	0.48273	-0.00644896
chr1_567489_568425	chr1_568003_568020	AGGAAGGAATCGAACCCC	3	18	5519	minus	1	1	1	chr1_568003_568020	chr1_568003_568020	25.9357	-0.0473546	0.194709	0.0543951	0.815585	0.940566	0.892584	0.0256857	2.2967e-05	0.80731	0.927364	-0.000792601
chr1_567489_568425	chr1_568038_568065	CCAACCCCATGGCCTCCATGACTTTTTC	2	28	19793	minus	0.749655	0.749655	0.749655	chr1_568038_568065	chr1_568038_568065	94.4586	-0.114655	0.176992	0.413054	0.520424	0.810717	0.266527	-0.187041	0.706472	-0.0635255	0.321782	-0.00775921
chr1_567489_568425	chr1_568039_568065	CAACCCCATGGCCTCCATGACTTTTTC	2	27	51787	minus	0.819573	0.819573	0.819573	chr1_568039_568065	chr1_568039_568065	248.339	-0.0601023	0.183994	0.105026	0.74588	0.915137	0.068214	-0.320179	0.559883	-0.102072	0.393332	-0.00701205
chr1_567489_568425	chr1_568040_568065	AACCCCATGGCCTCCATGACTTTTTC	2	26	78619	minus	0.759517	0.759517	0.759517	chr1_568040_568065	chr1_568040_568065	378.803	-0.358214	0.191844	3.36578	0.066564	0.340573	0.163163	-0.254542	0.602073	-0.0954491	0.693307	-0.00334592
chr1_567489_568425	chr1_568041_568065	ACCCCATGGCCTCCATGACTTTTTC	2	25	10759	minus	0.531525	0.531525	0.531525	chr1_568041_568065	chr1_568041_568065	51.2116	-0.429677	0.220061	3.48102	0.0620765	0.325448	0.561959	-0.120908	0.769439	0.0627215	0.544618	-0.00555496
chr1_567489_568425	chr1_568042_568065	CCCCATGGCCTCCATGACTTTTTC	2	24	10767	minus	0.490926	0.490926	0.490926	chr1_568042_568065	chr1_568042_568065	52.616	-0.312573	0.194891	2.32343	0.127439	0.462308	0.92986	-0.0161638	0.436237	0.145473	0.237548	-0.00970572
chr1_567489_568425	chr1_568043_568065	CCCATGGCCTCCATGACTTTTTC	2	23	22044	minus	0.559022	0.559022	0.559022	chr1_568043_568065	chr1_568043_568065	107.492	-0.165916	0.173867	0.843229	0.358475	0.713972	0.263736	-0.181937	0.509125	0.110401	0.329511	-0.00725596
chr1_567489_568425	chr1_568044_568065	CCATGGCCTCCATGACTTTTTC	2	22	24205	minus	0.608095	0.608095	0.608095	chr1_568044_568065	chr1_568044_568065	118.398	-0.243059	0.171214	1.89148	0.169035	0.518534	0.13478	-0.241348	0.458109	0.121768	0.748301	-0.00235816
chr1_567489_568425	chr1_568045_568065	CATGGCCTCCATGACTTTTTC	2	21	63571	minus	0.530653	0.530653	0.530653	chr1_568045_568065	chr1_568045_568065	313.711	0.0719549	0.170218	0.166663	0.683094	0.887877	0.19997	-0.203591	0.530801	0.102038	0.894276	-0.00101494
chr1_567489_568425	chr1_568047_568065	TGGCCTCCATGACTTTTTC	2	19	6235	minus	0.393443	0.393443	0.393443	chr1_568047_568065	chr1_568047_568065	29.7142	-0.2318	0.187643	1.44513	0.229312	0.598527	0.140876	-0.263951	0.864907	0.0306176	0.662092	-0.00352206
chr1_567489_568425	chr1_568048_568065	GGCCTCCATGACTTTTTC	2	18	43557	minus	0.499404	0.499404	0.499404	chr1_568048_568065	chr1_568048_568065	205.959	0.195703	0.163124	1.40322	0.236185	0.605137	0.00237903	-0.476586	0.107109	0.251599	0.0431805	-0.0142624
chr1_567489_568425	chr1_568049_568065	GCCTCCATGACTTTTTC	3	17	8953	minus	0.615622	0.615622	0.615622	chr1_568049_568065	chr1_568049_568065	42.2013	-0.175712	0.210112	0.71605	0.397443	0.73865	0.166793	-0.278865	0.212635	0.251661	0.0433749	-0.0184473
chr1_567489_568425	chr1_568050_568065	CCTCCATGACTTTTTC	7	16	7006	minus	0.621671	0.621671	0.621671	chr1_568050_568065	chr1_568050_568065	34.8336	-0.0502405	0.225009	0.051169	0.821041	0.943175	0.0193743	-0.504589	0.440961	0.167286	0.0354539	-0.0215771
chr1_568752_569003	chr1_568806_568825	ATTTACCCTATAGCACCCCC	2	20	1331	minus	NA	0.484903	Inf	chr1_568806_568825	chr1_568806_568825	6.04162	0.213274	0.466321	0.175089	0.675628	0.883035	0.415172	-0.359907	0.618152	-0.220141	0.12385	-0.0311924
chr1_568752_569003	chr1_568806_568827	ATTTACCCTATAGCACCCCCTC	2	22	925	minus	NA	0.484903	Inf	chr1_568806_568827	chr1_568806_568827	4.2508	-0.0976973	0.584924	0.0264396	0.870831	NA	0.675147	0.232266	0.882186	-0.0832942	0.221571	-0.0324719
chr1_568752_569003	chr1_568821_568837	CCCCCTCTACCCCCTCT	4	17	1149	minus	0.414826	0.386651	0.414826	chr1_568821_568837	chr1_568821_568837	5.45141	-0.621115	0.33357	3.63378	0.0566181	0.308416	0.959171	0.0165691	0.487226	0.227936	0.763267	-0.00457237
chr1_568752_569003	chr1_568821_568838	CCCCCTCTACCCCCTCTA	2	18	1876	minus	0.37248	0.37248	0.37248	chr1_568821_568838	chr1_568821_568838	8.8553	-0.394369	0.28225	2.03086	0.154134	0.500021	0.489635	-0.185807	0.904205	-0.0336437	0.427869	-0.0100137
chr1_568752_569003	chr1_568821_568839	CCCCCTCTACCCCCTCTAG	2	19	1146	minus	0.332312	0.336226	0.332312	chr1_568821_568839	chr1_568821_568839	5.5951	-0.0409688	0.334386	0.0154304	0.901142	0.969362	0.677632	-0.132754	0.702624	-0.126815	0.559089	-0.00863675
chr1_568752_569003	chr1_568871_568895	TTTTAAGTTAAAGATTAAGAGAACC	3	25	1110	minus	0.118742	0.118742	0.118742	chr1_568871_568895	chr1_568871_568895	5.37989	-0.0113569	0.270296	0.00169631	0.967147	0.988699	0.885327	-0.0372931	0.441513	0.201557	0.382026	-0.0105633
chr1_568752_569003	chr1_568873_568894	TTAAGTTAAAGATTAAGAGAAC	3	22	1088	minus	0.163859	0.163859	0.163859	chr1_568873_568894	chr1_568873_568894	5.09348	-0.344812	0.32511	1.11708	0.290548	0.654884	0.303511	-0.312516	0.775849	0.0878436	0.141833	0.0220277
chr1_568752_569003	chr1_568873_568895	TTAAGTTAAAGATTAAGAGAACC	3	23	1445	minus	0.163859	0.163859	0.163859	chr1_568873_568895	chr1_568873_568895	6.90833	-0.183994	0.273222	0.46349	0.495998	0.794571	0.495796	-0.175436	0.391468	-0.223099	0.682438	0.00491791
chr1_568752_569003	chr1_568877_568895	GTTAAAGATTAAGAGAACC	3	19	1138	minus	NA	NA	Inf	chr1_568877_568895	chr1_568877_568895	5.46193	0.176577	0.259119	0.48049	0.488201	0.790937	0.390885	-0.208934	0.773706	-0.0706479	0.31884	-0.0108747
chr1_568752_569003	chr1_568879_568901	TAAAGATTAAGAGAACCAACACC	3	23	1100	minus	0.0687284	0.0687284	0.0687284	chr1_568879_568901	chr1_568879_568901	5.56927	-0.0296605	0.310639	0.0100525	0.920136	0.973674	0.173076	-0.394383	0.512067	-0.192279	0.576435	-0.00788722
chr1_568752_569003	chr1_568880_568901	AAAGATTAAGAGAACCAACACC	3	22	1198	minus	0.0733391	0.0733391	0.0733391	chr1_568880_568901	chr1_568880_568901	6.07195	0.010386	0.312055	0.00107725	0.973817	0.990514	0.405882	-0.242981	0.57486	-0.164939	0.92081	0.00145339
chr1_568752_569003	chr1_568881_568901	AAGATTAAGAGAACCAACACC	3	21	1260	minus	0.0729537	0.0729537	0.0729537	chr1_568881_568901	chr1_568881_568901	5.96556	0.0333402	0.269168	0.0151384	0.902077	0.969362	0.104143	-0.413904	0.719157	0.0920111	0.182858	-0.0164825
chr1_568752_569003	chr1_568882_568901	AGATTAAGAGAACCAACACC	3	20	854	minus	0.0709862	0.0709862	0.0709862	chr1_568882_568901	chr1_568882_568901	4.15626	0.290177	0.30567	0.896689	0.343671	NA	0.388039	-0.251452	0.338393	-0.280508	0.627145	-0.00654861
chr1_568752_569003	chr1_568942_568962	CCCACCATAATTACCCCCATA	2	21	2703	minus	1	1	1	chr1_568942_568962	chr1_568942_568962	13.5873	-0.215392	0.238698	0.775277	0.37859	0.728119	0.790248	-0.0611984	0.714408	0.0853429	0.366134	-0.00982371
chr1_568752_569003	chr1_568946_568967	CCATAATTACCCCCATACTCCT	2	22	865	minus	1	1	1	chr1_568946_568967	chr1_568946_568967	4.43096	0.120452	0.43314	0.0826577	0.773728	0.926138	0.634198	-0.203962	0.945966	-0.0301243	0.553598	-0.0118406
chr1_1102536_1102564	chr1_1102540_1102560	TAATACTGCCTGGTAATGATG	1	21	7151	plus	0.180841	0.180841	0.180841	hsa-mir-200b	chr1_1102540_1102560	36.7713	0.595567	0.210887	7.92127	0.00488571	0.0862079	0.763887	-0.0611207	0.0069602	-0.553222	0.0659896	-0.0191744
chr1_1102536_1102564	chr1_1102540_1102561	TAATACTGCCTGGTAATGATGA	1	22	14398	plus	0.165179	0.165179	0.165179	hsa-mir-200b	chr1_1102540_1102561	71.7387	-0.189641	0.129756	2.05172	0.152035	0.496299	0.360053	0.112792	0.992362	0.00119862	0.769241	-0.00178509
chr1_1102536_1102564	chr1_1102540_1102562	TAATACTGCCTGGTAATGATGAC	1	23	4037	plus	0.0798755	0.0798755	0.0798755	hsa-mir-200b	chr1_1102540_1102562	20.2571	-0.0647845	0.179229	0.131817	0.716556	0.902488	0.59453	0.0900268	0.755207	-0.0530874	0.58718	-0.00451018
chr1_1102536_1102564	chr1_1102541_1102561	AATACTGCCTGGTAATGATGA	1	21	469	plus	0.0262022	0.0262022	0.0262022	hsa-mir-200b	chr1_1102541_1102561	2.19043	-0.228403	0.436962	0.243471	0.62171	NA	0.242482	-0.479003	0.696549	-0.160269	0.223506	-0.0262125
chr1_1103293_1103319	chr1_1103296_1103314	TAACACTGTCTGGTAACGA	1	19	569	plus	0.175546	0.175546	0.175546	hsa-mir-200a	chr1_1103296_1103314	2.73623	0.365617	0.39426	0.785465	0.375475	NA	0.141298	0.565618	0.30472	-0.389671	0.463061	-0.0136066
chr1_1103293_1103319	chr1_1103296_1103315	TAACACTGTCTGGTAACGAT	1	20	833	plus	0.181963	0.181963	0.181963	hsa-mir-200a	chr1_1103296_1103315	3.90736	0.541332	0.463452	1.3147	0.251545	NA	0.555841	0.26301	0.142893	-0.655801	0.240935	-0.0212026
chr1_1103293_1103319	chr1_1103296_1103316	TAACACTGTCTGGTAACGATG	1	21	12956	plus	0.0608786	0.0608786	0.0608786	hsa-mir-200a	chr1_1103296_1103316	62.4626	0.4917	0.231042	4.27878	0.0385911	0.256485	0.650276	0.101141	0.00980007	-0.584074	0.0675949	-0.0202973
chr1_1103293_1103319	chr1_1103296_1103317	TAACACTGTCTGGTAACGATGT	1	22	3052	plus	0.101622	0.101622	0.101622	hsa-mir-200a	chr1_1103296_1103317	14.441	0.0969767	0.217423	0.186345	0.665976	0.878895	0.949756	-0.0130924	0.306696	-0.213153	0.722335	-0.00350767
chr1_1103293_1103319	chr1_1103296_1103318	TAACACTGTCTGGTAACGATGTT	1	23	4775	plus	0.0467094	0.0467094	0.0467094	hsa-mir-200a	chr1_1103296_1103318	22.5001	0.0494218	0.208751	0.0554875	0.813776	0.939824	0.493096	0.133612	0.426903	-0.158059	0.450294	-0.00741892
chr1_1104432_1104457	chr1_1104434_1104456	CTAATACTGTCTGGTAAAACCGT	1	23	301	plus	0.0401141	0.0395609	0.0401141	hsa-mir-429	chr1_1104434_1104456	1.51636	0.264358	0.503891	0.311999	0.576456	NA	0.913852	0.0448188	0.790636	-0.117794	0.542499	0.0151983
chr1_1104432_1104457	chr1_1104435_1104455	TAATACTGTCTGGTAAAACCG	1	21	3261	plus	0.151605	0.151605	0.151605	hsa-mir-429	chr1_1104435_1104455	16.5437	0.537698	0.25662	4.05776	0.0439687	0.272133	0.0484636	0.49485	0.292245	-0.264485	0.0213228	-0.0283147
chr1_1104432_1104457	chr1_1104435_1104456	TAATACTGTCTGGTAAAACCGT	1	22	18427	plus	0.137652	0.137652	0.137652	hsa-mir-429	chr1_1104435_1104456	93.0587	-0.081519	0.134412	0.354871	0.551369	0.826141	0.221353	0.155627	0.812906	0.0305294	0.396343	-0.00527911
chr1_1104432_1104457	chr1_1104436_1104456	AATACTGTCTGGTAAAACCGT	1	21	448	plus	0.0609041	0.0601269	0.0609041	hsa-mir-429	chr1_1104436_1104456	2.28204	-0.361312	0.40566	0.726488	0.394024	NA	0.120965	0.597241	0.347688	0.371985	0.186787	0.0231481
chr1_9211732_9211873	chr1_9211793_9211815	AACAACCAGCTAAGACACTGCCA	1	23	12037	minus	0.262046	0.262046	0.262046	hsa-mir-34a	chr1_9211793_9211815	59.0972	-0.132504	0.149165	0.774036	0.378971	0.728119	0.00686267	0.391343	0.857372	-0.0258593	0.28835	0.00748557
chr1_9211732_9211873	chr1_9211794_9211815	ACAACCAGCTAAGACACTGCCA	1	22	42541	minus	0.449122	0.449122	0.449122	hsa-mir-34a	chr1_9211794_9211815	205.765	0.0661933	0.154666	0.179801	0.671545	0.881506	0.0275716	0.327644	0.973769	-0.0048472	0.955097	0.000408728
chr1_9211732_9211873	chr1_9211795_9211815	CAACCAGCTAAGACACTGCCA	1	21	21692	minus	0.474456	0.474456	0.474456	hsa-mir-34a	chr1_9211795_9211815	104.752	-0.00185036	0.176817	0.000109496	0.991651	0.997055	0.184492	0.226365	0.48745	-0.116276	0.510216	-0.00560212
chr1_9211732_9211873	chr1_9211796_9211815	AACCAGCTAAGACACTGCCA	1	20	43260	minus	0.52863	0.52863	0.52863	hsa-mir-34a	chr1_9211796_9211815	203.271	0.0262966	0.176799	0.0206008	0.885872	0.965173	0.278142	0.184198	0.370057	-0.149732	0.449126	-0.00649168
chr1_9211732_9211873	chr1_9211797_9211815	ACCAGCTAAGACACTGCCA	1	19	73670	minus	0.557717	0.557717	0.557717	hsa-mir-34a	chr1_9211797_9211815	353.413	0.185574	0.155651	1.36373	0.242892	0.612366	0.992909	-0.00135181	0.444418	-0.11228	0.0035931	-0.0216383
chr1_9211732_9211873	chr1_9211798_9211815	CCAGCTAAGACACTGCCA	1	18	7294	minus	0.626673	0.626673	0.626673	hsa-mir-34a	chr1_9211798_9211815	34.6253	0.195146	0.192242	0.990871	0.319529	0.682507	0.873372	-0.0299377	0.372237	-0.161984	0.033863	-0.0193389
chr1_9211732_9211873	chr1_9211801_9211815	GCTAAGACACTGCCA	6	15	2851	minus	1	1	1	hsa-mir-34a	chr1_9211801_9211815	13.206	0.673789	0.231314	7.97361	NA	NA	NA	0.0291183	NA	0.28349	NA	0.00262147
chr1_11968891_11968924	chr1_11968901_11968915	GCTCCCGCCGGCTTC	3	15	28562	minus	0.874385	0.789998	0.831286	chr1_11968901_11968915	chr1_11968901_11968915	133.062	0.632824	0.257605	5.45829	0.0194757	0.177187	0.278929	0.274983	0.541456	-0.150688	0.0668208	-0.0234982
chr1_11968891_11968924	chr1_11968901_11968916	GCTCCCGCCGGCTTCT	3	16	100744	minus	0.875294	0.83556	0.842654	chr1_11968901_11968916	chr1_11968901_11968916	472.937	0.715805	0.268926	6.52826	0.0106174	0.129665	0.236033	0.318554	0.563683	-0.150954	0.0160069	-0.0316512
chr1_11968891_11968924	chr1_11968901_11968917	GCTCCCGCCGGCTTCTC	2	17	68411	minus	0.867658	0.857487	0.867658	chr1_11968901_11968917	chr1_11968901_11968917	325.704	0.634729	0.271272	5.07366	0.024292	0.200125	0.220385	0.33671	0.330999	-0.261413	0.00280812	-0.0409888
chr1_11968891_11968924	chr1_11968901_11968918	GCTCCCGCCGGCTTCTCC	2	18	57406	minus	0.843602	0.785751	0.843602	chr1_11968901_11968918	chr1_11968901_11968918	282.632	0.462162	0.250698	3.27316	0.0704219	0.349787	0.138948	0.373736	0.474428	-0.176387	0.00127861	-0.0405701
chr1_11968891_11968924	chr1_11968902_11968916	CTCCCGCCGGCTTCT	3	15	10199	minus	0.683451	0.639017	0.683451	chr1_11968902_11968916	chr1_11968902_11968916	46.0127	0.792281	0.247891	9.93553	0.00162119	0.0472213	0.940899	-0.0177956	0.815486	-0.0557675	0.0014603	-0.0382666
chr1_11968891_11968924	chr1_11968902_11968917	CTCCCGCCGGCTTCTC	2	16	6809	minus	0.675976	0.678109	0.675976	chr1_11968902_11968917	chr1_11968902_11968917	30.1209	0.501975	0.259464	3.70432	0.0542719	0.301969	0.771824	-0.0733626	0.498807	-0.168934	0.00163997	-0.0396949
chr1_11968891_11968924	chr1_11968902_11968918	CTCCCGCCGGCTTCTCC	2	17	5901	minus	0.691968	0.693469	0.691968	chr1_11968902_11968918	chr1_11968902_11968918	25.9836	0.63325	0.253515	6.23042	0.0125574	0.139368	0.980915	-0.00585001	0.103538	-0.397262	2.50187e-05	-0.0522042
chr1_16872418_16872507	chr1_16872474_16872504	GGCGAGAATTCTACCACTGAACCACCAATGC	12	31	313120	minus	0.863514	0.863514	0.863514	chr1_16872474_16872504	chr1_16872474_16872504	1422.8	-0.306113	0.152054	4.20903	0.0402094	0.262089	0.801509	-0.035474	0.457454	0.107891	0.620634	0.00347266
chr1_16872418_16872507	chr1_16872475_16872504	GCGAGAATTCTACCACTGAACCACCAATGC	12	30	329276	minus	0.843979	0.843979	0.843979	chr1_16872475_16872504	chr1_16872475_16872504	1502.26	-0.418822	0.153373	7.49449	0.00618879	0.0972727	0.187023	0.18767	0.953172	0.00857358	0.48179	0.0049989
chr1_16872418_16872507	chr1_16872476_16872504	CGAGAATTCTACCACTGAACCACCAATGC	12	29	36878	minus	0.758034	0.758034	0.723178	chr1_16872476_16872504	chr1_16872476_16872504	173.14	-0.198001	0.112064	3.21208	0.0730965	0.352667	0.119755	0.162379	0.622493	0.052569	0.444976	0.00376613
chr1_16872418_16872507	chr1_16872477_16872504	GAGAATTCTACCACTGAACCACCAATGC	14	28	79530	minus	0.757732	0.757732	0.723902	chr1_16872477_16872504	chr1_16872477_16872504	369.959	-0.187974	0.123068	2.40836	0.120689	0.450383	0.5135	0.0754054	0.242283	0.137762	0.93443	0.000454759
chr1_16872418_16872507	chr1_16872478_16872504	AGAATTCTACCACTGAACCACCAATGC	14	27	61128	minus	0.742642	0.742642	0.742642	chr1_16872478_16872504	chr1_16872478_16872504	283.552	-0.1529	0.128215	1.46421	0.226262	0.595334	0.259434	0.136309	0.365216	0.111116	0.154431	0.00821774
chr1_16872418_16872507	chr1_16872479_16872504	GAATTCTACCACTGAACCACCAATGC	14	26	146476	minus	0.735786	0.735786	0.735786	chr1_16872479_16872504	chr1_16872479_16872504	699.463	-0.166667	0.120048	1.97708	0.159698	0.507642	0.251332	0.129083	0.5366	0.070865	0.106	0.00867492
chr1_16872418_16872507	chr1_16872480_16872504	AATTCTACCACTGAACCACCAATGC	14	25	199461	minus	0.701966	0.701966	0.701966	chr1_16872480_16872504	chr1_16872480_16872504	950.069	-0.379488	0.145353	7.11444	0.00764656	0.108958	0.667047	0.0588813	0.0492711	0.275088	0.711641	0.0024656
chr1_16872418_16872507	chr1_16872481_16872501	ATTCTACCACTGAACCACCAA	17	21	42796	minus	0.450988	0.174205	0.284058	chr1_16872481_16872501	chr1_16872481_16872501	211.512	-0.172295	0.0801413	4.71288	0.0299374	0.22103	0.0323847	0.161381	0.780824	0.0212242	0.000709942	0.0120952
chr1_16872418_16872507	chr1_16872481_16872504	ATTCTACCACTGAACCACCAATGC	14	24	92361	minus	0.736328	0.736328	0.736328	chr1_16872481_16872504	chr1_16872481_16872504	447.564	-0.291327	0.106584	7.68528	0.00556729	0.0916999	0.242623	0.116889	0.201852	0.130247	0.177225	0.00637832
chr1_16872418_16872507	chr1_16872482_16872501	TTCTACCACTGAACCACCAA	17	20	58901	minus	0.450988	0.113402	0.25771	chr1_16872482_16872501	chr1_16872482_16872501	292.58	-0.0267615	0.0735989	0.134742	0.713565	0.901774	0.00557295	0.191912	0.392302	0.059827	0.000257401	0.011881
chr1_16872418_16872507	chr1_16872482_16872504	TTCTACCACTGAACCACCAATGC	14	23	219810	minus	0.764076	0.764076	0.72972	chr1_16872482_16872504	chr1_16872482_16872504	1079.41	-0.254987	0.0904564	8.20054	0.00418779	0.0791043	0.0677086	0.154975	0.187815	0.113793	0.0396752	0.00833793
chr1_16872418_16872507	chr1_16872483_16872504	TCTACCACTGAACCACCAATGC	14	22	395927	minus	0.62345	0.62345	0.62345	chr1_16872483_16872504	chr1_16872483_16872504	1899.68	-0.440296	0.12767	12.6127	0.000383134	0.0206907	0.382899	0.104422	0.0435411	0.247141	0.039948	0.0117919
chr1_16872418_16872507	chr1_16872484_16872504	CTACCACTGAACCACCAATGC	14	21	157264	minus	0.605017	0.605017	0.605017	chr1_16872484_16872504	chr1_16872484_16872504	768.341	-0.258787	0.0833064	9.88033	0.00167055	0.0477199	0.086629	0.133862	0.447993	0.0601981	0.00976888	0.00954348
chr1_16872418_16872507	chr1_16872485_16872504	TACCACTGAACCACCAATGC	14	20	119274	minus	0.531474	0.531474	0.445058	chr1_16872485_16872504	chr1_16872485_16872504	572.368	-0.198062	0.106207	3.64222	0.0563318	0.307336	0.00193335	0.308989	0.537633	0.0625172	0.0274558	0.0103695
chr1_16872418_16872507	chr1_16872486_16872504	ACCACTGAACCACCAATGC	15	19	62232	minus	0.555096	0.555096	0.555096	chr1_16872486_16872504	chr1_16872486_16872504	292.362	-0.237959	0.123882	3.87421	0.0490335	0.284888	0.140119	0.172048	0.582874	0.0652313	0.13249	0.00828188
chr1_16872418_16872507	chr1_16872487_16872504	CCACTGAACCACCAATGC	15	18	123612	minus	0.696471	0.696471	0.58585	chr1_16872487_16872504	chr1_16872487_16872504	579.305	-0.144575	0.135278	1.21208	0.27092	0.63421	0.314913	-0.128144	0.0407701	0.265822	0.61962	0.00300113
chr1_16872418_16872507	chr1_16872488_16872504	CACTGAACCACCAATGC	15	17	153255	minus	0.756218	0.756218	0.657198	chr1_16872488_16872504	chr1_16872488_16872504	705.279	0.151762	0.174535	0.814667	0.366744	0.719589	0.084713	-0.286543	0.00358986	0.493822	0.816323	-0.0018671
chr1_16872418_16872507	chr1_16872489_16872504	ACTGAACCACCAATGC	18	16	53625	minus	0.827121	0.827121	0.761612	chr1_16872489_16872504	chr1_16872489_16872504	245.685	-0.0642174	0.209457	0.103458	0.747718	0.915853	0.063436	-0.369166	0.0159071	0.491191	0.933428	-0.000806614
chr1_17188412_17188493	chr1_17188416_17188431	GCATTGGTGGTTCAGT	18	16	53625	plus	0.761612	0.761612	0.761612	chr1_17188416_17188431	chr1_17188416_17188431	245.685	-0.0642174	0.209457	0.103458	0.747718	0.915853	0.063436	-0.369166	0.0159071	0.491191	0.933428	-0.000806614
chr1_17188412_17188493	chr1_17188416_17188432	GCATTGGTGGTTCAGTG	15	17	153255	plus	0.657198	0.657198	0.657198	chr1_17188416_17188432	chr1_17188416_17188432	705.279	0.151762	0.174535	0.814667	0.366744	0.719589	0.084713	-0.286543	0.00358986	0.493822	0.816323	-0.0018671
chr1_17188412_17188493	chr1_17188416_17188433	GCATTGGTGGTTCAGTGG	15	18	123612	plus	0.58585	0.58585	0.58585	chr1_17188416_17188433	chr1_17188416_17188433	579.305	-0.144575	0.135278	1.21208	0.27092	0.63421	0.314913	-0.128144	0.0407701	0.265822	0.61962	0.00300113
chr1_17188412_17188493	chr1_17188416_17188434	GCATTGGTGGTTCAGTGGT	15	19	62232	plus	0.574063	0.574063	0.555096	chr1_17188416_17188434	chr1_17188416_17188434	292.362	-0.237959	0.123882	3.87421	0.0490335	0.284888	0.140119	0.172048	0.582874	0.0652313	0.13249	0.00828188
chr1_17188412_17188493	chr1_17188416_17188435	GCATTGGTGGTTCAGTGGTA	14	20	119274	plus	0.445058	0.445058	0.445058	chr1_17188416_17188435	chr1_17188416_17188435	572.368	-0.198062	0.106207	3.64222	0.0563318	0.307336	0.00193335	0.308989	0.537633	0.0625172	0.0274558	0.0103695
chr1_17188412_17188493	chr1_17188416_17188436	GCATTGGTGGTTCAGTGGTAG	14	21	157264	plus	0.659511	0.627056	0.605017	chr1_17188416_17188436	chr1_17188416_17188436	768.341	-0.258787	0.0833064	9.88033	0.00167055	0.0477199	0.086629	0.133862	0.447993	0.0601981	0.00976888	0.00954348
chr1_17188412_17188493	chr1_17188416_17188437	GCATTGGTGGTTCAGTGGTAGA	14	22	395927	plus	0.704649	0.559758	0.62345	chr1_17188416_17188437	chr1_17188416_17188437	1899.68	-0.440296	0.12767	12.6127	0.000383134	0.0206907	0.382899	0.104422	0.0435411	0.247141	0.039948	0.0117919
chr1_17188412_17188493	chr1_17188416_17188438	GCATTGGTGGTTCAGTGGTAGAA	14	23	219810	plus	0.72972	0.630306	0.72972	chr1_17188416_17188438	chr1_17188416_17188438	1079.41	-0.254987	0.0904564	8.20054	0.00418779	0.0791043	0.0677086	0.154975	0.187815	0.113793	0.0396752	0.00833793
chr1_17188412_17188493	chr1_17188416_17188439	GCATTGGTGGTTCAGTGGTAGAAT	14	24	92361	plus	0.737538	0.598206	0.736328	chr1_17188416_17188439	chr1_17188416_17188439	447.564	-0.291327	0.106584	7.68528	0.00556729	0.0916999	0.242623	0.116889	0.201852	0.130247	0.177225	0.00637832
chr1_17188412_17188493	chr1_17188416_17188440	GCATTGGTGGTTCAGTGGTAGAATT	14	25	199461	plus	0.73814	0.61288	0.701966	chr1_17188416_17188440	chr1_17188416_17188440	950.069	-0.379488	0.145353	7.11444	0.00764656	0.108958	0.667047	0.0588813	0.0492711	0.275088	0.711641	0.0024656
chr1_17188412_17188493	chr1_17188416_17188441	GCATTGGTGGTTCAGTGGTAGAATTC	14	26	146476	plus	0.762	0.762	0.735786	chr1_17188416_17188441	chr1_17188416_17188441	699.463	-0.166667	0.120048	1.97708	0.159698	0.507642	0.251332	0.129083	0.5366	0.070865	0.106	0.00867492
chr1_17188412_17188493	chr1_17188416_17188442	GCATTGGTGGTTCAGTGGTAGAATTCT	14	27	61128	plus	0.787846	0.787846	0.742642	chr1_17188416_17188442	chr1_17188416_17188442	283.552	-0.1529	0.128215	1.46421	0.226262	0.595334	0.259434	0.136309	0.365216	0.111116	0.154431	0.00821774
chr1_17188412_17188493	chr1_17188416_17188443	GCATTGGTGGTTCAGTGGTAGAATTCTC	14	28	79530	plus	0.723902	0.723902	0.723902	chr1_17188416_17188443	chr1_17188416_17188443	369.959	-0.187974	0.123068	2.40836	0.120689	0.450383	0.5135	0.0754054	0.242283	0.137762	0.93443	0.000454759
chr1_17188412_17188493	chr1_17188416_17188444	GCATTGGTGGTTCAGTGGTAGAATTCTCG	12	29	36878	plus	0.723178	0.723178	0.723178	chr1_17188416_17188444	chr1_17188416_17188444	173.14	-0.198001	0.112064	3.21208	0.0730965	0.352667	0.119755	0.162379	0.622493	0.052569	0.444976	0.00376613
chr1_17188412_17188493	chr1_17188416_17188445	GCATTGGTGGTTCAGTGGTAGAATTCTCGC	12	30	329276	plus	0.871961	0.871961	0.843979	chr1_17188416_17188445	chr1_17188416_17188445	1502.26	-0.418822	0.153373	7.49449	0.00618879	0.0972727	0.187023	0.18767	0.953172	0.00857358	0.48179	0.0049989
chr1_17188412_17188493	chr1_17188416_17188446	GCATTGGTGGTTCAGTGGTAGAATTCTCGCC	12	31	313120	plus	0.883344	0.883344	0.863514	chr1_17188416_17188446	chr1_17188416_17188446	1422.8	-0.306113	0.152054	4.20903	0.0402094	0.262089	0.801509	-0.035474	0.457454	0.107891	0.620634	0.00347266
chr1_17188412_17188493	chr1_17188419_17188438	TTGGTGGTTCAGTGGTAGAA	17	20	58901	plus	0.450988	0.450988	0.25771	chr1_17188419_17188438	chr1_17188419_17188438	292.58	-0.0267615	0.0735989	0.134742	0.713565	0.901774	0.00557295	0.191912	0.392302	0.059827	0.000257401	0.011881
chr1_17188412_17188493	chr1_17188419_17188439	TTGGTGGTTCAGTGGTAGAAT	17	21	42796	plus	0.450988	0.450988	0.284058	chr1_17188419_17188439	chr1_17188419_17188439	211.512	-0.172295	0.0801413	4.71288	0.0299374	0.22103	0.0323847	0.161381	0.780824	0.0212242	0.000709942	0.0120952
chr1_20622345_20622372	chr1_20622348_20622363	TGAGGTTGTAGGTTGT	2	16	552	plus	0.144038	0.144038	0.144038	chr1_20622348_20622363	chr1_20622348_20622363	2.40173	0.0177931	0.281071	0.00402206	0.949432	NA	0.0152974	-0.662959	0.689045	0.108729	0.913269	-0.00147232
chr1_20622345_20622372	chr1_20622348_20622365	TGAGGTTGTAGGTTGTTT	1	18	540	plus	0.32101	0.32101	0.32101	chr1_20622348_20622365	chr1_20622348_20622365	2.59523	-0.54442	0.241624	4.80776	0.0283319	NA	0.208894	-0.297674	0.607498	0.121889	0.881745	-0.00167265
chr1_20622345_20622372	chr1_20622348_20622367	TGAGGTTGTAGGTTGTTTGG	1	20	2471	plus	0.681157	0.681157	0.681157	chr1_20622348_20622367	chr1_20622348_20622367	12.589	-0.635057	0.203056	10.0336	0.00153713	0.0452787	0.554368	0.114281	0.597305	0.104621	0.0769653	0.0159949
chr1_20622345_20622372	chr1_20622348_20622368	TGAGGTTGTAGGTTGTTTGGT	1	21	8589	plus	0.760284	0.760284	0.760284	chr1_20622348_20622368	chr1_20622348_20622368	44.1277	-0.55691	0.199656	8.03703	0.00458307	0.0841613	0.410021	0.156734	0.702705	0.0741945	0.117474	0.0137339
chr1_20622345_20622372	chr1_20622348_20622369	TGAGGTTGTAGGTTGTTTGGTT	1	22	14845	plus	0.740697	0.740697	0.740697	chr1_20622348_20622369	chr1_20622348_20622369	74.0578	-0.437956	0.175602	6.48911	0.0108537	0.130483	0.944639	-0.0115822	0.708537	0.0630379	0.474841	0.00554294
chr1_20622345_20622372	chr1_20622348_20622370	TGAGGTTGTAGGTTGTTTGGTTT	1	23	3958	plus	0.53238	0.53238	0.53238	chr1_20622348_20622370	chr1_20622348_20622370	19.0024	-0.425092	0.174786	6.24942	0.0124234	0.138798	0.737728	-0.0558182	0.114034	0.268795	0.934713	-0.000631004
chr1_22441116_22441142	chr1_22441121_22441136	GGGGGATTAGCTCAGC	1	16	667341	plus	0.874968	0.874968	0.874968	chr1_22441121_22441136	chr1_22441121_22441136	3163.13	0.974768	0.327619	7.51517	0.00611815	0.096634	0.00508149	-0.99777	0.0142907	0.792549	0.676083	-0.00700894
chr1_22441116_22441142	chr1_22441121_22441137	GGGGGATTAGCTCAGCT	1	17	130143	plus	0.882813	0.882813	0.882813	chr1_22441121_22441137	chr1_22441121_22441137	561.425	0.793603	0.291164	6.66896	0.00981065	0.12624	0.0195152	-0.688153	0.344599	0.26845	0.178642	-0.019965
chr1_22441116_22441142	chr1_22441121_22441138	GGGGGATTAGCTCAGCTG	1	18	47556	plus	0.823477	0.823477	0.823477	chr1_22441121_22441138	chr1_22441121_22441138	199.623	0.670394	0.281831	5.18886	0.0227321	0.193323	0.125487	-0.428383	0.375304	0.24593	0.162805	-0.0206648
chr1_22441116_22441142	chr1_22441121_22441139	GGGGGATTAGCTCAGCTGG	1	19	43401	plus	0.788151	0.788151	0.788151	chr1_22441121_22441139	chr1_22441121_22441139	189.695	0.570166	0.219057	6.36413	0.011645	0.133742	0.0680166	-0.382006	0.423535	0.167389	0.0370802	-0.0224565
chr1_22441116_22441142	chr1_22441121_22441140	GGGGGATTAGCTCAGCTGGG	1	20	46586	plus	0.779325	0.779325	0.779325	chr1_22441121_22441140	chr1_22441121_22441140	210.651	0.417266	0.229596	3.12346	0.0771728	0.361164	0.451555	-0.162849	0.934833	-0.0177659	0.0345165	-0.0237384
chr1_22441116_22441142	chr1_22441122_22441136	GGGGATTAGCTCAGC	4	15	31213	plus	0.84346	0.84346	0.84346	chr1_22441122_22441136	chr1_22441122_22441136	142.139	1.23979	0.358785	10.1232	0.00146413	0.0443339	0.219044	-0.486219	0.00315303	1.08649	0.264492	-0.0215952
chr1_23696744_23696781	chr1_23696747_23696763	GGCTGGTCCGATGGTAG	13	17	810876	plus	0.684341	0.684341	0.65588	chr1_23696747_23696763	chr1_23696747_23696763	3945.89	0.0734599	0.149299	0.249923	0.617129	0.854571	0.138759	-0.212319	0.0738738	0.256777	0.770168	-0.00196984
chr1_23696744_23696781	chr1_23696747_23696764	GGCTGGTCCGATGGTAGT	11	18	1314073	plus	0.444271	0.444271	0.444271	chr1_23696747_23696764	chr1_23696747_23696764	6476.14	0.046858	0.112793	0.178212	0.672915	0.881506	0.401093	-0.0900752	0.0733299	0.194465	0.727521	-0.00177422
chr1_23696744_23696781	chr1_23696747_23696765	GGCTGGTCCGATGGTAGTG	10	19	1491899	plus	0.277898	0.277898	0.277898	chr1_23696747_23696765	chr1_23696747_23696765	7535.36	-0.0110839	0.0913943	0.0150279	0.902433	0.969362	0.523601	0.0551888	0.0146601	0.214165	0.306528	0.00418551
chr1_23696744_23696781	chr1_23696747_23696766	GGCTGGTCCGATGGTAGTGG	9	20	1267268	plus	0.49449	0.49449	0.314987	chr1_23696747_23696766	chr1_23696747_23696766	6462.94	-0.0239295	0.102132	0.0540862	0.8161	0.940566	0.366037	0.0871169	0.356444	0.0896589	0.12633	0.00708147
chr1_23696744_23696781	chr1_23696747_23696767	GGCTGGTCCGATGGTAGTGGG	9	21	1713355	plus	0.469902	0.469902	0.424678	chr1_23696747_23696767	chr1_23696747_23696767	8805.49	-0.0364748	0.103174	0.123338	0.725442	0.905576	0.170508	0.1332	0.139162	0.145576	0.123722	0.00714353
chr1_23696744_23696781	chr1_23696747_23696768	GGCTGGTCCGATGGTAGTGGGT	9	22	1110564	plus	0.557046	0.557046	0.557046	chr1_23696747_23696768	chr1_23696747_23696768	5637.37	-0.14121	0.0824497	2.9113	0.0879612	0.380296	0.140451	0.114385	0.0387823	0.162586	0.0380985	0.00769511
chr1_23696744_23696781	chr1_23696747_23696769	GGCTGGTCCGATGGTAGTGGGTT	8	23	1659866	plus	0.51448	0.51448	0.318454	chr1_23696747_23696769	chr1_23696747_23696769	8363.76	-0.165999	0.0738319	4.98381	0.0255856	0.205315	0.0672976	0.12745	0.279992	0.0760098	0.451037	0.00249288
chr1_23696744_23696781	chr1_23696747_23696770	GGCTGGTCCGATGGTAGTGGGTTA	7	24	479392	plus	0.388485	0.388485	0.366482	chr1_23696747_23696770	chr1_23696747_23696770	2423.22	-0.042742	0.0887682	0.234603	0.628132	0.857875	0.621462	0.0413696	0.919353	-0.00855002	0.318179	0.00391284
chr1_25483506_25483603	chr1_25483508_25483525	TACAAACCCTTGTGTCGA	3	18	3066	minus	0.33969	0.325581	0.33969	chr1_25483508_25483525	chr1_25483508_25483525	13.7354	-0.0224779	0.172547	0.0172629	0.895468	0.969362	0.147374	-0.236653	0.935005	0.0135225	0.063927	-0.0139906
chr1_25483506_25483603	chr1_25483509_25483523	ACAAACCCTTGTGTC	17	15	14600	minus	0.79414	0.645018	0.79414	chr1_25483509_25483523	chr1_25483509_25483523	66.3313	0.250172	0.187289	1.79776	0.179984	0.534571	0.0790759	-0.317301	0.754732	-0.0561953	0.158215	-0.0125709
chr1_25483506_25483603	chr1_25483509_25483524	ACAAACCCTTGTGTCG	4	16	35683	minus	0.825879	0.813965	0.825029	chr1_25483509_25483524	chr1_25483509_25483524	159.194	0.225356	0.188105	1.44923	0.228652	0.59746	0.0211133	-0.417324	0.419808	-0.145271	0.0419596	-0.0180027
chr1_25483506_25483603	chr1_25483509_25483525	ACAAACCCTTGTGTCGA	4	17	87098	minus	0.779224	0.737793	0.779224	chr1_25483509_25483525	chr1_25483509_25483525	396.029	0.130795	0.176542	0.562634	0.453201	0.772808	0.0115076	-0.4271	0.304215	-0.173776	0.0317272	-0.017734
chr1_25483506_25483603	chr1_25483509_25483526	ACAAACCCTTGTGTCGAA	1	18	2476	minus	0.464019	0.440277	0.464019	chr1_25483509_25483526	chr1_25483509_25483526	11.1034	-0.0473587	0.188799	0.0612214	0.804576	0.936195	0.124475	-0.275496	0.0740946	-0.324164	0.0668814	-0.0158596
chr1_25483506_25483603	chr1_25483510_25483525	CAAACCCTTGTGTCGA	6	16	2456	minus	0.57315	0.565125	0.355386	chr1_25483510_25483525	chr1_25483510_25483525	10.9205	0.132732	0.197723	0.45912	0.498036	0.796628	0.0618421	-0.355335	0.554021	-0.11091	0.156633	-0.0132045
chr1_26880997_26881088	chr1_26881031_26881051	TGGCAGCAAGGAAGGCAGGGG	1	21	494	plus	0.0476326	0.0449758	0.0476326	hsa-mir-1976	chr1_26881031_26881051	2.48866	0.308041	0.390608	0.601419	0.438037	NA	0.991286	0.0040677	0.985043	0.00724224	0.884816	0.00283026
chr1_26880997_26881088	chr1_26881031_26881052	TGGCAGCAAGGAAGGCAGGGGT	1	22	3387	plus	0.120965	0.109378	0.120965	hsa-mir-1976	chr1_26881031_26881052	17.568	0.215362	0.211519	1.06439	0.302216	0.664515	0.938962	0.0155471	0.291746	0.216073	0.108965	0.0151013
chr1_26880997_26881088	chr1_26881031_26881053	TGGCAGCAAGGAAGGCAGGGGTC	1	23	761	plus	0.0332221	0.0233888	0.0332221	hsa-mir-1976	chr1_26881031_26881053	3.76992	-0.22137	0.341354	0.454505	0.500203	NA	0.952967	0.0193869	0.574593	-0.18283	0.474132	0.0111826
chr1_26880997_26881088	chr1_26881032_26881051	GGCAGCAAGGAAGGCAGGGG	1	20	436	plus	0.0512373	0.047805	0.0512373	hsa-mir-1976	chr1_26881032_26881051	2.42247	-0.322005	0.375563	0.659948	0.416578	NA	0.136237	0.573601	0.309417	-0.367522	0.815886	0.00394821
chr1_26880997_26881088	chr1_26881032_26881052	GGCAGCAAGGAAGGCAGGGGT	1	21	3575	plus	0.13093	0.118111	0.13093	hsa-mir-1976	chr1_26881032_26881052	18.8055	0.0218365	0.200501	0.011284	0.915403	0.9729	0.209283	0.245132	0.417373	0.158181	0.87001	-0.00143034
chr1_26880997_26881088	chr1_26881032_26881053	GGCAGCAAGGAAGGCAGGGGTC	1	22	2677	plus	0.0971147	0.0843709	0.0971147	hsa-mir-1976	chr1_26881032_26881053	13.6485	0.0273214	0.219627	0.015384	0.90129	0.969362	0.0954318	0.354832	0.290679	-0.220204	0.120736	0.0150632
chr1_26880997_26881088	chr1_26881033_26881052	GCAGCAAGGAAGGCAGGGGT	1	20	1867	plus	0.0995006	0.101636	0.0995006	hsa-mir-1976	chr1_26881033_26881052	9.7457	0.102297	0.237863	0.178624	0.672558	0.881506	0.75613	0.0716611	0.236512	0.273539	0.74925	0.00344743
chr1_26880997_26881088	chr1_26881033_26881053	GCAGCAAGGAAGGCAGGGGTC	1	21	1646	plus	0.05875	0.0716601	0.05875	hsa-mir-1976	chr1_26881033_26881053	8.50511	0.00657313	0.261859	0.000615695	0.980204	0.993371	0.583724	0.135764	0.01384	0.629011	0.0273098	0.0251128
chr1_26880997_26881088	chr1_26881033_26881054	GCAGCAAGGAAGGCAGGGGTCC	1	22	303	plus	0.000617421	0.00051515	0.000617421	hsa-mir-1976	chr1_26881033_26881054	1.52389	0.163031	0.521621	0.0972834	0.755114	NA	0.927516	0.0374301	0.292798	-0.52056	0.529557	-0.0138767
chr1_26880997_26881088	chr1_26881034_26881052	CAGCAAGGAAGGCAGGGGT	3	19	919	plus	0.046913	0.0694277	0.046913	hsa-mir-1976	chr1_26881034_26881052	4.86342	-0.0531097	0.305187	0.0302252	0.86198	0.957942	0.565269	0.168274	0.735797	0.100999	0.213653	0.0162041
chr1_26880997_26881088	chr1_26881034_26881053	CAGCAAGGAAGGCAGGGGTC	3	20	935	plus	0.0306947	0.0682767	0.0306947	hsa-mir-1976	chr1_26881034_26881053	4.90241	-0.1772	0.317676	0.276826	0.598789	0.849997	0.629374	0.1536	0.49462	0.210217	0.0539226	0.0294408
chr1_26880997_26881088	chr1_26881034_26881054	CAGCAAGGAAGGCAGGGGTCC	2	21	810	plus	0.00010495	6.67848e-05	0.00010495	hsa-mir-1976	chr1_26881034_26881054	4.11482	-0.0216477	0.280796	0.00594131	0.93856	NA	0.916872	0.0279781	0.0789577	0.477445	0.0595082	0.0254813
chr1_26880997_26881088	chr1_26881064_26881086	TCCTCCTGCCCTCCTTGCTGTAG	1	23	1463	plus	0.12815	0.0857345	0.12815	hsa-mir-1976	chr1_26881064_26881086	7.61513	-0.429858	0.225418	3.32574	0.0682034	0.344668	0.198038	0.285625	0.504755	0.146535	0.832367	0.00212801
chr1_26880997_26881088	chr1_26881065_26881086	CCTCCTGCCCTCCTTGCTGTAG	1	22	4913	plus	0.0986841	0.10706	0.0986841	hsa-mir-1976	chr1_26881065_26881086	25.3396	0.0388808	0.148065	0.0685508	0.793459	0.932274	0.194541	0.183361	0.620404	0.0706248	0.372413	0.00588506
chr1_26880997_26881088	chr1_26881066_26881086	CTCCTGCCCTCCTTGCTGTAG	1	21	687	plus	0.0447056	0.047148	0.0447056	hsa-mir-1976	chr1_26881066_26881086	3.51222	-0.073591	0.346411	0.0444659	0.832989	NA	0.24017	0.39595	0.777138	-0.0954023	0.181361	0.0211252
chr1_26880997_26881088	chr1_26881067_26881086	TCCTGCCCTCCTTGCTGTAG	1	20	2443	plus	0.0371128	0.102898	0.0371128	hsa-mir-1976	chr1_26881067_26881086	12.6661	0.104028	0.213682	0.23428	0.628368	0.858048	0.895878	0.0271242	0.895559	-0.0270302	0.577035	-0.00552154
chr1_27099560_27099582	chr1_27099562_27099576	GTTCTTGTGGAGCCA	5	15	439	plus	0.204644	0.239342	0.204644	chr1_27099562_27099576	chr1_27099562_27099576	2.01384	0.615824	0.349996	2.91575	0.0877185	NA	0.600327	-0.180013	0.0196663	0.790507	0.616936	0.00875119
chr1_27099560_27099582	chr1_27099562_27099578	GTTCTTGTGGAGCCATC	1	17	1295	plus	0.362348	0.341661	0.362348	chr1_27099562_27099578	chr1_27099562_27099578	5.51595	0.437364	0.289023	2.16365	0.141309	0.484155	0.906578	-0.0329012	0.806745	0.0677083	0.669195	-0.00582792
chr1_27099560_27099582	chr1_27099562_27099579	GTTCTTGTGGAGCCATCC	1	18	12061	plus	0.417692	0.423277	0.417692	chr1_27099562_27099579	chr1_27099562_27099579	53.7108	0.503112	0.199653	5.99271	0.0143651	0.150696	0.19701	-0.253165	0.265438	0.215976	0.768199	-0.00280136
chr1_27099560_27099582	chr1_27099562_27099580	GTTCTTGTGGAGCCATCCT	1	19	890	plus	0.18761	0.168272	0.18761	chr1_27099562_27099580	chr1_27099562_27099580	4.10164	-0.107714	0.324761	0.0998419	0.752019	NA	0.788835	-0.0825077	0.502467	-0.210828	0.598405	-0.00809463
chr1_27099560_27099582	chr1_27099563_27099578	TTCTTGTGGAGCCATC	2	16	872	plus	0.321302	0.320454	0.321302	chr1_27099563_27099578	chr1_27099563_27099578	3.6926	0.144152	0.321052	0.186535	0.665817	NA	0.699313	-0.119992	0.364603	0.27926	0.068095	-0.029186
chr1_27099560_27099582	chr1_27099563_27099579	TTCTTGTGGAGCCATCC	1	17	3835	plus	0.479265	0.474358	0.479265	chr1_27099563_27099579	chr1_27099563_27099579	16.324	0.522317	0.232345	4.67975	0.0305201	0.223942	0.39628	-0.194812	0.0822658	0.399265	0.799443	-0.00278292
chr1_27099560_27099582	chr1_27099563_27099580	TTCTTGTGGAGCCATCCT	1	18	347	plus	0.126007	0.123755	0.126007	chr1_27099563_27099580	chr1_27099563_27099580	1.56711	0.254683	0.42585	0.323845	0.569306	NA	0.233533	-0.487135	0.76388	0.126525	0.817976	-0.00436903
chr1_27099560_27099582	chr1_27099564_27099578	TCTTGTGGAGCCATC	5	15	1606	plus	0.441138	0.40071	0.441138	chr1_27099564_27099578	chr1_27099564_27099578	7.07627	0.634489	0.275096	4.80883	0.0283142	0.21463	0.643854	-0.124571	0.269934	0.295951	0.444922	-0.0100123
chr1_27099560_27099582	chr1_27099564_27099579	TCTTGTGGAGCCATCC	1	16	7105	plus	0.461361	0.442339	0.461361	chr1_27099564_27099579	chr1_27099564_27099579	30.7613	0.99735	0.267169	12.3384	0.000443725	0.0222396	0.3521	-0.249349	0.0705908	0.483732	0.637422	-0.00625962
chr1_27099560_27099582	chr1_27099564_27099580	TCTTGTGGAGCCATCCT	1	17	519	plus	0.249319	0.222044	0.249319	chr1_27099564_27099580	chr1_27099564_27099580	2.173	0.58362	0.339387	2.9097	0.0880484	NA	0.688127	-0.128017	0.681343	0.132484	0.740358	-0.00558179
chr1_27099560_27099582	chr1_27099565_27099579	CTTGTGGAGCCATCC	3	15	805	plus	0.41958	0.376655	0.41958	chr1_27099565_27099579	chr1_27099565_27099579	3.47811	0.686088	0.308513	4.43207	0.0352697	NA	0.686357	-0.122117	0.544546	0.182947	0.740126	-0.00491848
chr1_28242608_28242669	chr1_28242610_28242629	TCTTCACTTTGACATTCAGA	6	20	2258	minus	0.101233	0.0949884	0.101233	chr1_28242610_28242629	chr1_28242610_28242629	10.7279	-0.063207	0.245949	0.0631781	0.801542	0.935255	0.564304	-0.136317	0.765746	-0.0697191	0.558256	0.00669451
chr1_28242608_28242669	chr1_28242610_28242631	TCTTCACTTTGACATTCAGAGC	5	22	3806	minus	0.121673	0.102992	0.119854	chr1_28242610_28242631	chr1_28242610_28242631	18.2507	0.144078	0.222706	0.393273	0.530584	0.817045	0.762518	0.0665206	0.0633657	-0.393085	0.410542	0.00824607
chr1_28242608_28242669	chr1_28242610_28242633	TCTTCACTTTGACATTCAGAGCAC	5	24	3824	minus	0.139538	0.143542	0.139538	chr1_28242610_28242633	chr1_28242610_28242633	17.7252	-0.135725	0.257999	0.277919	0.598069	0.849618	0.81031	-0.0626912	0.476848	-0.178669	0.889305	0.00165423
chr1_28242608_28242669	chr1_28242611_28242628	CTTCACTTTGACATTCAG	7	18	2969	minus	0.148289	0.141111	0.148289	chr1_28242611_28242628	chr1_28242611_28242628	13.9263	0.257302	0.255802	0.889318	0.345662	0.705705	0.171299	-0.353525	0.890518	-0.0344515	0.0508573	-0.023241
chr1_28242608_28242669	chr1_28242611_28242629	CTTCACTTTGACATTCAGA	6	19	3111	minus	0.143473	0.12313	0.143473	chr1_28242611_28242629	chr1_28242611_28242629	15.5035	-0.0591013	0.210781	0.071225	0.789561	0.930337	0.00181794	-0.663887	0.0489305	0.403142	0.191688	-0.0127101
chr1_28242608_28242669	chr1_28242611_28242630	CTTCACTTTGACATTCAGAG	6	20	5414	minus	0.133418	0.157027	0.132533	chr1_28242611_28242630	chr1_28242611_28242630	26.9658	0.261673	0.227349	1.23419	0.266594	0.630014	0.0834001	-0.400046	0.723604	0.0774201	0.0947768	-0.0162373
chr1_28242608_28242669	chr1_28242611_28242631	CTTCACTTTGACATTCAGAGC	5	21	2640	minus	0.155333	0.141043	0.155333	chr1_28242611_28242631	chr1_28242611_28242631	12.9092	-0.0100613	0.260175	0.00145608	0.969561	0.989157	0.711839	-0.0987028	0.438975	-0.194231	0.317641	-0.0111678
chr1_28242608_28242669	chr1_28242611_28242632	CTTCACTTTGACATTCAGAGCA	5	22	3946	minus	0.134515	0.157811	0.132182	chr1_28242611_28242632	chr1_28242611_28242632	19.8031	-0.134382	0.272507	0.221191	0.638134	0.862053	0.1687	-0.402246	0.350117	-0.247003	0.418207	-0.00962719
chr1_28242608_28242669	chr1_28242611_28242633	CTTCACTTTGACATTCAGAGCAC	5	23	3144	minus	0.174287	0.140381	0.171287	chr1_28242611_28242633	chr1_28242611_28242633	15.1524	0.0781863	0.314106	0.0605143	0.805685	0.936646	0.345276	-0.309694	0.728672	-0.111902	0.0851202	-0.0236214
chr1_28242608_28242669	chr1_28242613_28242633	TCACTTTGACATTCAGAGCAC	5	21	2588	minus	0.154048	0.103046	0.154048	chr1_28242613_28242633	chr1_28242613_28242633	11.9953	-0.0691119	0.295146	0.0547023	0.815074	0.940463	0.800748	-0.0746853	0.432454	-0.226929	0.410271	-0.010744
chr1_28242608_28242669	chr1_28242614_28242631	CACTTTGACATTCAGAGC	5	18	3384	minus	0.233472	0.154448	0.233472	chr1_28242614_28242631	chr1_28242614_28242631	15.6592	-0.0268262	0.225541	0.0123824	0.911397	0.971504	0.0798697	-0.409953	0.338294	-0.211743	0.597921	-0.0054237
chr1_28242608_28242669	chr1_28242614_28242632	CACTTTGACATTCAGAGCA	5	19	3854	minus	0.202597	0.169425	0.202597	chr1_28242614_28242632	chr1_28242614_28242632	18.7469	-0.284573	0.261492	1.03553	0.308864	0.672244	0.0633298	-0.518663	0.120225	-0.398637	0.574939	-0.00671214
chr1_28242608_28242669	chr1_28242614_28242633	CACTTTGACATTCAGAGCAC	5	20	6569	minus	0.196237	0.141806	0.196237	chr1_28242614_28242633	chr1_28242614_28242633	31.346	-0.203746	0.272681	0.527983	0.467456	0.780566	0.170699	-0.393687	0.27662	-0.295151	0.278366	-0.0131066
chr1_28242608_28242669	chr1_28242614_28242634	CACTTTGACATTCAGAGCACT	5	21	2366	minus	0.0837848	0.079244	0.0837848	chr1_28242614_28242634	chr1_28242614_28242634	11.3869	0.170267	0.241769	0.498736	0.480056	0.788331	0.836451	0.0487607	0.485408	0.164399	0.161476	-0.0142503
chr1_28242608_28242669	chr1_28242614_28242635	CACTTTGACATTCAGAGCACTG	5	22	3104	minus	0.128766	0.114125	0.128766	chr1_28242614_28242635	chr1_28242614_28242635	14.3854	0.314757	0.257718	1.36076	0.243405	0.612512	0.426281	0.205306	0.505175	-0.16187	0.629262	-0.00530229
chr1_28242608_28242669	chr1_28242614_28242636	CACTTTGACATTCAGAGCACTGG	5	23	4624	minus	0.127092	0.119892	0.127092	chr1_28242614_28242636	chr1_28242614_28242636	21.0299	0.665084	0.220983	8.10844	0.00440597	0.0815655	0.766988	0.0656511	0.0688062	-0.377803	0.583037	-0.00554882
chr1_28242608_28242669	chr1_28242614_28242637	CACTTTGACATTCAGAGCACTGGG	5	24	5352	minus	0.136901	0.138241	0.130933	chr1_28242614_28242637	chr1_28242614_28242637	25.2062	0.759851	0.202503	14.3129	0.000154802	0.0118725	0.689598	0.0792144	0.359896	-0.176504	0.418259	-0.00701131
chr1_28242608_28242669	chr1_28242615_28242636	ACTTTGACATTCAGAGCACTGG	5	22	3703	minus	0.0688615	0.0634918	0.0656476	chr1_28242615_28242636	chr1_28242615_28242636	17.4507	0.00642326	0.208107	0.000895055	0.976133	0.991647	0.658705	-0.0894045	0.385488	0.172953	0.891171	-0.00123995
chr1_28242608_28242669	chr1_28242615_28242637	ACTTTGACATTCAGAGCACTGGG	5	23	2904	minus	0.108827	0.0978358	0.108827	chr1_28242615_28242637	chr1_28242615_28242637	14.2165	0.306804	0.233645	1.73927	0.187232	0.544099	0.776718	0.0666106	0.335598	-0.218534	0.00185074	-0.0311089
chr1_28242608_28242669	chr1_28242616_28242636	CTTTGACATTCAGAGCACTGG	5	21	2412	minus	0.12112	0.111553	0.12112	chr1_28242616_28242636	chr1_28242616_28242636	11.3873	0.1725	0.297022	0.272703	0.601524	0.851368	0.548178	0.191449	0.724926	-0.0998277	0.950601	-0.000810619
chr1_28242608_28242669	chr1_28242616_28242637	CTTTGACATTCAGAGCACTGGG	5	22	2548	minus	0.0995588	0.100118	0.0995588	chr1_28242616_28242637	chr1_28242616_28242637	12.3467	0.265872	0.281931	0.840852	0.359153	0.714055	0.451671	-0.210801	0.86338	-0.0472877	0.394223	-0.0102707
chr1_28242608_28242669	chr1_28242617_28242639	TTTGACATTCAGAGCACTGGGCA	8	23	2691	minus	NA	0.116854	0.118389	chr1_28242617_28242639	chr1_28242617_28242639	12.8687	0.483337	0.279236	2.98015	0.0842915	0.375494	0.142026	0.404114	0.499798	-0.182478	0.133485	-0.0194613
chr1_28242608_28242669	chr1_28242619_28242637	TGACATTCAGAGCACTGGG	9	19	3759	minus	0.262733	0.177159	0.223848	chr1_28242619_28242637	chr1_28242619_28242637	17.7319	0.555688	0.240637	4.96782	0.0258232	0.206106	0.0820785	-0.422269	0.782752	0.0654317	0.107627	-0.0169805
chr1_28242608_28242669	chr1_28242619_28242641	TGACATTCAGAGCACTGGGCAGA	8	23	4268	minus	0.103431	0.106649	0.103431	chr1_28242619_28242641	chr1_28242619_28242641	20.2835	0.812358	0.269253	9.35511	0.00222364	0.0567942	0.722066	-0.0965036	0.806207	0.0648427	0.0363333	-0.0230488
chr1_28242608_28242669	chr1_28242620_28242636	GACATTCAGAGCACTGG	10	17	3272	minus	0.266554	0.207468	0.266554	chr1_28242620_28242636	chr1_28242620_28242636	16.2708	0.257463	0.247507	0.956865	0.327978	0.68987	4.75715e-05	-1.02169	0.00386396	0.703785	0.690213	0.00478445
chr1_28242608_28242669	chr1_28242620_28242637	GACATTCAGAGCACTGGG	9	18	5018	minus	0.322438	0.230893	0.277218	chr1_28242620_28242637	chr1_28242620_28242637	24.318	0.38931	0.237817	2.2196	0.136268	0.47696	0.000131927	-0.955801	0.0149363	0.573099	0.485744	-0.00747639
chr1_28242608_28242669	chr1_28242620_28242639	GACATTCAGAGCACTGGGCA	8	20	3445	minus	0.188054	0.135366	0.140548	chr1_28242620_28242639	chr1_28242620_28242639	17.1141	0.474909	0.262723	3.08965	0.0787919	0.364937	0.312115	-0.259389	0.568221	0.146555	0.0906606	-0.0205321
chr1_28242608_28242669	chr1_28242620_28242640	GACATTCAGAGCACTGGGCAG	8	21	3953	minus	0.12544	0.12544	0.115349	chr1_28242620_28242640	chr1_28242620_28242640	19.6621	0.531271	0.235969	4.74472	0.0293884	0.219341	0.844464	-0.0479639	0.261018	0.256447	0.00377526	-0.0292704
chr1_28242608_28242669	chr1_28242620_28242641	GACATTCAGAGCACTGGGCAGA	8	22	4994	minus	0.123217	0.117067	0.0979472	chr1_28242620_28242641	chr1_28242620_28242641	24.8348	0.307225	0.185642	2.76811	0.0961598	0.40227	0.769204	-0.0527034	0.549781	0.106148	0.0547822	-0.0152858
chr1_28845052_28845081	chr1_28845059_28845074	CGCGGCCCCTCCGCCG	1	16	303	minus	0.128833	0.114914	0.128833	chr1_28845059_28845074	chr1_28845059_28845074	1.36102	0.330371	0.321495	1.10308	0.293592	NA	0.531993	-0.192021	0.48034	0.215095	0.0728446	-0.0257964
chr1_28845052_28845081	chr1_28845059_28845075	CGCGGCCCCTCCGCCGC	1	17	758	minus	0.283041	0.283041	0.283041	chr1_28845059_28845075	chr1_28845059_28845075	3.24922	0.113115	0.283165	0.157044	0.691893	NA	0.981011	-0.00633802	0.621038	-0.131905	0.496528	-0.00902261
chr1_28845052_28845081	chr1_28845059_28845076	CGCGGCCCCTCCGCCGCC	1	18	22732	minus	0.377962	0.36114	0.377962	chr1_28845059_28845076	chr1_28845059_28845076	105.235	0.194418	0.18117	1.1045	0.293282	0.657608	0.746725	0.0560587	0.787716	0.0465714	0.145634	-0.0130174
chr1_28845052_28845081	chr1_28845060_28845075	GCGGCCCCTCCGCCGC	2	16	3260	minus	0.433645	0.433645	0.433645	chr1_28845060_28845075	chr1_28845060_28845075	14.6296	0.499279	0.236181	4.42103	0.0354986	0.244732	0.900551	0.0282302	0.705967	-0.0845701	0.0888808	-0.0199773
chr1_28845052_28845081	chr1_28845060_28845076	GCGGCCCCTCCGCCGCC	2	17	988	minus	0.302327	0.298303	0.302327	chr1_28845060_28845076	chr1_28845060_28845076	4.4232	0.213262	0.29599	0.524137	0.469082	0.781021	0.173971	0.385481	0.574069	-0.16057	0.00970904	-0.0384966
chr1_28845052_28845081	chr1_28845061_28845075	CGGCCCCTCCGCCGC	9	15	488	minus	0.179199	0.179199	0.179199	chr1_28845061_28845075	chr1_28845061_28845075	2.26097	0.520241	0.287444	3.25894	0.0710349	NA	0.950127	0.017359	0.87467	0.043665	0.33691	-0.0127012
chr1_28845052_28845081	chr1_28845061_28845076	CGGCCCCTCCGCCGCC	7	16	439	minus	0.139109	0.139109	0.139109	chr1_28845061_28845076	chr1_28845061_28845076	1.88119	-0.0165837	0.306676	0.00281997	0.95765	NA	0.186689	-0.396378	0.779279	0.0832999	0.808316	-0.00328993
chr1_33487634_33487657	chr1_33487637_33487652	CACTAGAGTCCAGAGT	1	16	1528	plus	0.534584	0.527375	0.534584	chr1_33487637_33487652	chr1_33487637_33487652	6.81366	0.0709444	0.258862	0.0744781	0.784925	0.928789	0.0421752	-0.524205	0.0768366	0.451237	0.626791	0.00596833
chr1_33487634_33487657	chr1_33487638_33487652	ACTAGAGTCCAGAGT	3	15	78979	plus	0.53159	0.53159	0.529749	chr1_33487638_33487652	chr1_33487638_33487652	363.548	0.243015	0.198425	1.46745	0.225749	0.59483	0.00295073	-0.584608	0.00593703	0.533867	0.534993	0.0057354
chr1_33487634_33487657	chr1_33487639_33487653	CTAGAGTCCAGAGTC	11	15	2479	plus	0.529749	0.525359	0.529749	chr1_33487639_33487653	chr1_33487639_33487653	11.7122	-0.038407	0.220775	0.0305152	0.861326	0.957942	0.0740153	-0.377724	0.0141492	0.523089	0.507175	0.00672215
chr1_33797978_33798029	chr1_33798006_33798026	CTAGAGGACAGGTAACACGGA	1	21	1625	minus	0.0455137	0.0898187	0.0455137	chr1_33798006_33798026	chr1_33798006_33798026	8.50066	-0.128389	0.275841	0.202433	0.652764	0.871823	0.594212	0.145228	0.295323	0.282253	0.373499	0.0113079
chr1_33797978_33798029	chr1_33798006_33798027	CTAGAGGACAGGTAACACGGAG	1	22	665	minus	0.00706938	0.00706938	0.00706938	chr1_33798006_33798027	chr1_33798006_33798027	3.42595	-0.0690388	0.310507	0.0491924	0.824474	NA	0.577686	0.162552	0.622041	-0.146939	0.984344	0.000289401
chr1_33797978_33798029	chr1_33798006_33798028	CTAGAGGACAGGTAACACGGAGG	1	23	4787	minus	0.00530119	0.00503473	0.00530119	chr1_33798006_33798028	chr1_33798006_33798028	24.0105	0.0580885	0.148568	0.151418	0.697184	0.894859	0.792968	-0.0370936	0.647938	-0.0654205	0.20789	-0.00840793
chr1_33797978_33798029	chr1_33798007_33798028	TAGAGGACAGGTAACACGGAGG	1	22	3499	minus	0.00619798	0.00576774	0.00619798	chr1_33798007_33798028	chr1_33798007_33798028	17.7242	-0.0214359	0.159651	0.0173634	0.895166	0.969362	0.514774	0.0989545	0.463914	-0.11143	0.935281	-0.000597087
chr1_33797978_33798029	chr1_33798008_33798027	AGAGGACAGGTAACACGGAG	1	20	1811	minus	0.135034	0.135034	0.135034	chr1_33798008_33798027	chr1_33798008_33798027	9.02478	-0.0912858	0.236675	0.141188	0.707103	0.900285	0.320528	0.23548	0.828212	-0.049842	0.513819	0.00745786
chr1_33797978_33798029	chr1_33798008_33798028	AGAGGACAGGTAACACGGAGG	1	21	31813	minus	0.0811038	0.0811038	0.0811038	chr1_33798008_33798028	chr1_33798008_33798028	168.109	0.0286699	0.129755	0.0460809	0.830029	0.946993	0.208268	0.157028	0.78764	-0.0335986	0.462756	0.00442367
chr1_33797978_33798029	chr1_33798009_33798028	GAGGACAGGTAACACGGAGG	1	20	1915	minus	0.216796	0.216796	0.216796	chr1_33798009_33798028	chr1_33798009_33798028	9.87349	0.00365781	0.230459	0.000227142	0.987975	0.995337	0.348762	-0.212631	0.447284	0.168058	0.928744	-0.000961183
chr1_33797978_33798029	chr1_33798010_33798028	AGGACAGGTAACACGGAGG	1	19	1170	minus	0.083479	0.083479	0.083479	chr1_33798010_33798028	chr1_33798010_33798028	5.99814	0.0901749	0.270967	0.0941147	0.75901	0.920833	0.498659	-0.18414	0.858275	-0.0469865	0.936927	-0.000975206
chr1_33798043_33798076	chr1_33798050_33798072	GGCTTCCTTGCTATCCATCCTCA	1	23	1606	minus	0.00745279	0.000810972	0.00745279	chr1_33798050_33798072	chr1_33798050_33798072	7.82273	-0.0344081	0.216666	0.0257444	0.872526	0.961714	0.98889	-0.00283887	0.432576	-0.161486	0.648125	0.00467372
chr1_33798043_33798076	chr1_33798050_33798074	GGCTTCCTTGCTATCCATCCTCATC	1	25	506	minus	0.000692925	0.000173019	0.000692925	chr1_33798050_33798074	chr1_33798050_33798074	2.49578	0.0552141	0.340545	0.0236573	0.87776	NA	0.73546	0.108203	0.286125	-0.345008	0.978645	0.000400717
chr1_33798043_33798076	chr1_33798051_33798072	GCTTCCTTGCTATCCATCCTCA	1	22	1700	minus	0.00189788	0.00519858	0.00189788	chr1_33798051_33798072	chr1_33798051_33798072	8.40468	0.0745106	0.216634	0.118901	0.730229	0.906731	0.380609	0.179058	0.449232	-0.15519	0.192707	0.0127516
chr1_33798043_33798076	chr1_33798051_33798073	GCTTCCTTGCTATCCATCCTCAT	1	23	583	minus	0.000835821	0.000835821	0.000835821	chr1_33798051_33798073	chr1_33798051_33798073	3.0089	0.106163	0.336419	0.0995118	0.752416	NA	0.642283	0.147529	0.748401	-0.103385	0.099681	0.0267923
chr1_33798043_33798076	chr1_33798051_33798074	GCTTCCTTGCTATCCATCCTCATC	1	24	1475	minus	4.41465e-06	0.00299786	4.41465e-06	chr1_33798051_33798074	chr1_33798051_33798074	7.33851	-0.158559	0.217287	0.547079	0.459514	0.775964	0.514924	-0.132689	0.895147	-0.0273582	0.0986797	0.016244
chr1_33798043_33798076	chr1_33798052_33798072	CTTCCTTGCTATCCATCCTCA	1	21	9166	minus	0.0360535	0.0633403	0.0360535	chr1_33798052_33798072	chr1_33798052_33798072	49.24	-0.0460037	0.188743	0.0562872	0.812464	0.939768	0.353256	0.168413	0.870735	-0.029233	0.116425	0.013167
chr1_33798043_33798076	chr1_33798052_33798073	CTTCCTTGCTATCCATCCTCAT	1	22	1694	minus	0.0468492	0.0468492	0.0468492	chr1_33798052_33798073	chr1_33798052_33798073	8.61014	-0.117613	0.229073	0.257075	0.612137	0.853611	0.0305135	0.470444	0.195126	-0.282804	0.1145	0.0154177
chr1_33798043_33798076	chr1_33798052_33798074	CTTCCTTGCTATCCATCCTCATC	1	23	3871	minus	0.0282925	0.114841	0.0282925	chr1_33798052_33798074	chr1_33798052_33798074	20.5489	-0.033581	0.181141	0.0327889	0.856307	0.956406	0.717663	0.0622711	0.396444	-0.146478	0.0897701	0.0138319
chr1_33798043_33798076	chr1_33798053_33798072	TTCCTTGCTATCCATCCTCA	1	20	686	minus	0.147681	0.117572	0.147681	chr1_33798053_33798072	chr1_33798053_33798072	3.62721	0.0332294	0.348248	0.00857057	0.926239	NA	0.931561	-0.0291259	0.716091	0.122303	0.0615409	0.0312291
chr1_33798043_33798076	chr1_33798053_33798073	TTCCTTGCTATCCATCCTCAT	1	21	381	minus	0.0458489	0.0458489	0.0458489	chr1_33798053_33798073	chr1_33798053_33798073	2.04475	0.176452	0.486161	0.105823	0.744951	NA	0.336587	0.462871	1	-0.00875807	0.312922	0.0269928
chr1_33798043_33798076	chr1_33798053_33798074	TTCCTTGCTATCCATCCTCATC	1	22	980	minus	0.0700406	0.0900191	0.0700406	chr1_33798053_33798074	chr1_33798053_33798074	5.229	-0.0742255	0.325091	0.0481726	0.826274	0.945201	0.0217534	0.736736	0.976282	0.00945252	0.27071	0.0157736
chr1_33798043_33798076	chr1_33798054_33798074	TCCTTGCTATCCATCCTCATC	1	21	537	minus	0.0350869	0.0321375	0.0350869	chr1_33798054_33798074	chr1_33798054_33798074	2.92822	-0.204523	0.397147	0.227018	0.633744	NA	0.0648598	0.729474	0.035465	0.823966	0.282913	0.0202908
chr1_35893460_35893515	chr1_35893463_35893480	CTTAACAATAACCCACAA	8	18	4388	minus	0.133225	0.0844482	0.133225	chr1_35893463_35893480	chr1_35893463_35893480	20.5953	0.0371134	0.166811	0.04977	0.823464	0.944492	0.0853394	-0.276726	0.30649	0.164527	0.148824	-0.0105242
chr1_35893460_35893515	chr1_35893463_35893481	CTTAACAATAACCCACAAC	6	19	4821	minus	0.0604492	0.0617858	0.0604492	chr1_35893463_35893481	chr1_35893463_35893481	22.9424	-0.0834848	0.203774	0.15673	0.692185	0.892569	0.035819	0.412916	0.666096	0.0853597	0.0737653	-0.0165159
chr1_35893460_35893515	chr1_35893463_35893485	CTTAACAATAACCCACAACACTC	4	23	2360	minus	0.0305237	0.0314717	0.0305237	chr1_35893463_35893485	chr1_35893463_35893485	11.4223	0.187768	0.24132	0.549929	0.458347	0.775218	0.231664	0.277948	0.761145	0.0710496	0.699479	-0.00419938
chr1_35893460_35893515	chr1_35893464_35893479	TTAACAATAACCCACA	10	16	1323	minus	0.186795	0.205088	0.186795	chr1_35893464_35893479	chr1_35893464_35893479	5.6281	0.739966	0.273519	6.98359	0.00822603	0.115029	0.964001	0.012081	0.45985	-0.192431	0.0725918	-0.023769
chr1_35893460_35893515	chr1_35893464_35893480	TTAACAATAACCCACAA	10	17	3579	minus	0.253055	0.173621	0.247405	chr1_35893464_35893480	chr1_35893464_35893480	16.5341	0.1088	0.171569	0.403683	0.525193	0.813227	0.00109716	-0.542136	0.85989	0.0287512	0.335007	-0.00777579
chr1_35893460_35893515	chr1_35893464_35893481	TTAACAATAACCCACAAC	7	18	10916	minus	0.218753	0.164182	0.217014	chr1_35893464_35893481	chr1_35893464_35893481	50.0994	0.107476	0.169016	0.391727	0.531393	0.81782	0.874803	0.0258541	0.597134	0.0848431	0.197959	-0.0102447
chr1_35893460_35893515	chr1_35893464_35893482	TTAACAATAACCCACAACA	5	19	3007	minus	0.146265	0.0944846	0.146265	chr1_35893464_35893482	chr1_35893464_35893482	13.6558	0.339234	0.208395	2.50212	0.113693	0.437304	0.617842	0.100417	0.526441	0.126823	0.132365	-0.0140005
chr1_35893460_35893515	chr1_35893464_35893483	TTAACAATAACCCACAACAC	5	20	5130	minus	0.111046	0.116635	0.111046	chr1_35893464_35893483	chr1_35893464_35893483	24.4837	0.0795883	0.197365	0.153171	0.695523	0.894604	0.224476	0.228578	0.844017	0.0371536	0.473075	-0.006582
chr1_35893460_35893515	chr1_35893464_35893484	TTAACAATAACCCACAACACT	5	21	8588	minus	0.128997	0.121541	0.128997	chr1_35893464_35893484	chr1_35893464_35893484	40.6387	-0.0837308	0.191386	0.183628	0.668274	0.879883	0.46368	0.136034	0.451807	0.138795	0.642106	-0.00422093
chr1_35893460_35893515	chr1_35893464_35893485	TTAACAATAACCCACAACACTC	4	22	11401	minus	0.102343	0.108942	0.102343	chr1_35893464_35893485	chr1_35893464_35893485	54.5239	-0.02695	0.185508	0.0199347	0.88772	0.965645	0.543705	0.108348	0.480379	0.125888	0.957228	0.000469408
chr1_35893460_35893515	chr1_35893465_35893480	TAACAATAACCCACAA	11	16	3871	minus	0.243747	0.136963	0.168907	chr1_35893465_35893480	chr1_35893465_35893480	17.9505	0.0915097	0.177036	0.264364	0.607138	0.853531	0.0084256	-0.454177	0.0801307	0.296475	0.435448	-0.00643083
chr1_35893460_35893515	chr1_35893465_35893481	TAACAATAACCCACAAC	7	17	5551	minus	0.279607	0.138455	0.202908	chr1_35893465_35893481	chr1_35893465_35893481	25.9453	0.0208142	0.165493	0.0159786	0.89941	0.969362	0.0226179	-0.36413	0.11735	0.248308	0.568578	-0.0043681
chr1_35893460_35893515	chr1_35893465_35893482	TAACAATAACCCACAACA	5	18	2461	minus	0.133468	0.0688459	0.11536	chr1_35893465_35893482	chr1_35893465_35893482	11.4439	0.117229	0.182975	0.419002	0.517436	0.80788	0.541276	-0.108223	0.925575	-0.0163873	0.477312	-0.0057917
chr1_35893460_35893515	chr1_35893465_35893483	TAACAATAACCCACAACAC	5	19	3435	minus	0.0671466	0.0755327	0.0662537	chr1_35893465_35893483	chr1_35893465_35893483	16.3732	-0.0340644	0.15182	0.0489064	0.824977	0.944717	0.87956	-0.0220591	0.247035	0.169441	0.890077	0.000947573
chr1_35893460_35893515	chr1_35893465_35893484	TAACAATAACCCACAACACT	5	20	6285	minus	0.0528075	0.0535534	0.0519711	chr1_35893465_35893484	chr1_35893465_35893484	31.0095	0.0240011	0.145648	0.0273766	0.868583	0.959756	0.253493	0.158725	0.520767	0.0899239	0.0564947	0.0129116
chr1_35893460_35893515	chr1_35893465_35893485	TAACAATAACCCACAACACTC	4	21	5710	minus	0.0458107	0.046299	0.0458107	chr1_35893465_35893485	chr1_35893465_35893485	29.2558	0.110298	0.155216	0.485025	0.486155	0.78956	0.0443242	0.300408	0.467903	0.109501	0.111337	0.0114943
chr1_35893460_35893515	chr1_35893466_35893483	AACAATAACCCACAACAC	7	18	1275	minus	0.0515376	0.0438193	0.0515376	chr1_35893466_35893483	chr1_35893466_35893483	5.76227	0.28499	0.214346	1.83102	0.176007	0.52893	0.160149	-0.286061	0.554997	-0.120975	0.479126	0.0067993
chr1_35893460_35893515	chr1_35893466_35893484	AACAATAACCCACAACACT	7	19	3174	minus	0.0641111	0.0667394	0.0378815	chr1_35893466_35893484	chr1_35893466_35893484	14.9892	-0.282111	0.17358	2.67575	0.101887	0.411637	0.647355	-0.0752578	0.348184	0.157169	0.0456972	0.0157447
chr1_35893460_35893515	chr1_35893466_35893485	AACAATAACCCACAACACTC	6	20	2877	minus	0.0476825	0.0481396	0.0243246	chr1_35893466_35893485	chr1_35893466_35893485	14.0377	-0.195806	0.187565	1.10444	0.293295	0.657608	0.87499	0.0278713	0.0822336	0.316641	0.552804	0.00502094
chr1_35893460_35893515	chr1_35893467_35893484	ACAATAACCCACAACACT	7	18	1181	minus	0.0776795	0.0776795	0.0776795	chr1_35893467_35893484	chr1_35893467_35893484	5.42325	-0.251612	0.218638	1.28457	0.257051	0.620977	0.975057	-0.00657192	0.0599665	0.395845	0.943221	0.000720902
chr1_35893460_35893515	chr1_35893467_35893485	ACAATAACCCACAACACTC	6	19	1471	minus	0.0456136	0.0468004	0.0456136	chr1_35893467_35893485	chr1_35893467_35893485	7.03924	0.123423	0.20831	0.356146	0.550654	0.825716	0.932813	-0.0168998	0.560726	0.116841	0.41315	0.00828311
chr1_35893460_35893515	chr1_35893476_35893494	CACAACACTCAGACCAACA	1	19	2335	minus	0.60087	0.60087	0.60087	chr1_35893476_35893494	chr1_35893476_35893494	11.0846	-0.169391	0.183911	0.853875	0.355458	0.712394	0.770504	0.0516025	0.138468	0.265873	0.817674	0.00190912
chr1_35893460_35893515	chr1_35893477_35893494	ACAACACTCAGACCAACA	1	18	4979	minus	0.60087	0.60087	0.60087	chr1_35893477_35893494	chr1_35893477_35893494	23.8884	-0.102103	0.191587	0.289954	0.59025	0.845406	0.489079	-0.127912	0.00985622	0.482428	0.868801	0.00143305
chr1_41220038_41220125	chr1_41220043_41220064	TGTAAACATCCTTGACTGGAAG	1	22	1297091	plus	0.250934	0.250934	0.250934	hsa-mir-30e	chr1_41220043_41220064	6803.94	-0.212903	0.112443	3.52185	0.060565	0.320562	0.0265566	0.238286	0.321584	-0.105948	0.248456	0.0057024
chr1_41220038_41220125	chr1_41220043_41220065	TGTAAACATCCTTGACTGGAAGC	1	23	5352565	plus	0.651708	0.651708	0.651708	hsa-mir-30e	chr1_41220043_41220065	27624.6	-0.284845	0.0683265	17.4543	2.94297e-05	0.004508	0.00522432	0.180355	0.205359	-0.0821896	0.193426	0.00397439
chr1_41220038_41220125	chr1_41220043_41220066	TGTAAACATCCTTGACTGGAAGCT	1	24	29658222	plus	0.648214	0.648214	0.648214	hsa-mir-30e	chr1_41220043_41220066	153954	-0.219708	0.0742436	8.7269	0.00313549	0.0687349	0.0107517	0.179032	0.344414	-0.0668703	0.0473294	0.00656676
chr1_41220038_41220125	chr1_41220044_41220066	GTAAACATCCTTGACTGGAAGCT	1	23	2878209	plus	0.529201	0.529201	0.529201	hsa-mir-30e	chr1_41220044_41220066	15201	-0.0991815	0.096044	1.04632	0.306355	0.669882	0.0132423	0.224704	0.71373	-0.0335325	0.0415337	0.00874272
chr1_41220038_41220125	chr1_41220085_41220106	CTTTCAGTCGGATGTTTACAGC	1	22	584785	plus	1	1	1	hsa-mir-30e	chr1_41220085_41220106	2985.81	-0.441125	0.105648	17.7977	2.45676e-05	0.00420413	0.601538	0.0521487	0.506669	0.0670884	0.892512	-0.000634679
chr1_41222942_41222997	chr1_41222972_41222991	TGTAAACATCCTACACTCTC	2	20	1372	plus	0.346116	0.346116	0.346116	hsa-mir-30c-1	chr1_41222972_41222991	7.36907	-0.110291	0.321113	0.109333	0.740904	0.913009	0.00337807	0.925878	0.715351	0.11183	0.361024	0.0123836
chr1_41222942_41222997	chr1_41222972_41222992	TGTAAACATCCTACACTCTCA	2	21	9924	plus	0.135722	0.135722	0.135722	hsa-mir-30c-1	chr1_41222972_41222992	53.3093	-0.127547	0.245336	0.236374	0.626837	0.857135	0.000547495	0.84864	0.429264	-0.185366	0.0397273	0.020268
chr1_41222942_41222997	chr1_41222972_41222993	TGTAAACATCCTACACTCTCAG	2	22	711	plus	0.148077	0.148077	0.148077	hsa-mir-30c-1	chr1_41222972_41222993	3.57143	-0.818834	0.398459	3.74271	0.0530384	NA	0.0868646	0.695144	0.781613	-0.10513	0.0613609	0.0337265
chr1_41222942_41222997	chr1_41222972_41222994	TGTAAACATCCTACACTCTCAGC	2	23	19218	plus	0.513825	0.513825	0.408271	hsa-mir-30c-1	chr1_41222972_41222994	96.5128	-0.556303	0.189712	8.33047	0.00389855	0.076803	0.0115068	0.472692	0.783893	-0.0508404	0.582759	0.00466245
chr1_41222942_41222997	chr1_41222972_41222995	TGTAAACATCCTACACTCTCAGCT	2	24	27211	plus	0.521038	0.521038	0.509733	hsa-mir-30c-1	chr1_41222972_41222995	135.123	-0.620114	0.20067	9.32906	0.00225548	0.0573931	0.139162	0.291481	0.675645	-0.0813702	0.841649	0.00177918
chr1_41222942_41222997	chr1_41222973_41222995	GTAAACATCCTACACTCTCAGCT	2	23	646	plus	0.169302	0.169302	0.166964	hsa-mir-30c-1	chr1_41222973_41222995	3.34925	-0.729868	0.363582	3.84739	0.0498233	NA	0.122588	0.547517	0.594574	-0.188467	0.705389	0.00644429
chr1_41223001_41223035	chr1_41223011_41223030	CTGGGAGAGGGTTGTTTACT	2	20	1707	plus	0.0428892	0.0428892	0.0428892	hsa-mir-30c-1	chr1_41223011_41223030	8.37493	0.117261	0.200827	0.338206	0.560866	0.829948	0.492498	0.129724	0.311163	-0.192475	0.407873	-0.00721252
chr1_41223001_41223035	chr1_41223011_41223031	CTGGGAGAGGGTTGTTTACTC	1	21	4859	plus	0.170442	0.170442	0.170442	hsa-mir-30c-1	chr1_41223011_41223031	24.5734	-0.365409	0.148994	6.21851	0.0126422	0.140053	0.395374	-0.119733	0.892144	0.0193912	0.126892	-0.0101853
chr1_41223001_41223035	chr1_41223011_41223032	CTGGGAGAGGGTTGTTTACTCC	1	22	19936	plus	0.25321	0.25321	0.25321	hsa-mir-30c-1	chr1_41223011_41223032	101.622	-0.48566	0.135671	13.1741	0.000283848	0.0173671	0.883039	-0.0188802	0.988406	-0.00189335	0.653549	-0.00274664
chr1_41223001_41223035	chr1_41223011_41223033	CTGGGAGAGGGTTGTTTACTCCT	1	23	1398	plus	0.115386	0.115386	0.115386	hsa-mir-30c-1	chr1_41223011_41223033	7.00161	-0.301398	0.242579	1.52042	0.217556	0.581167	0.875995	-0.0356664	0.307915	0.236199	0.153799	-0.0162879
chr1_41223001_41223035	chr1_41223011_41223034	CTGGGAGAGGGTTGTTTACTCCTT	1	24	1384	plus	0.0601343	0.0601343	0.0601343	hsa-mir-30c-1	chr1_41223011_41223034	6.98066	-0.24307	0.227874	1.11689	0.290588	0.654921	0.933478	0.0180253	0.591908	0.117057	0.260307	-0.011317
chr1_41223001_41223035	chr1_41223012_41223030	TGGGAGAGGGTTGTTTACT	2	19	959	plus	0.0319385	0.0319385	0.0319385	hsa-mir-30c-1	chr1_41223012_41223030	4.68699	-0.30659	0.229684	1.77166	0.183177	0.539496	0.062014	0.402376	0.18462	0.292398	0.312937	0.0100012
chr1_41223001_41223035	chr1_41223012_41223031	TGGGAGAGGGTTGTTTACTC	1	20	1635	plus	0.081477	0.081477	0.081477	hsa-mir-30c-1	chr1_41223012_41223031	7.89381	-0.219971	0.21867	1.01268	0.314262	0.678899	0.576862	0.114834	0.0274524	0.466562	0.707527	0.00366917
chr1_41223001_41223035	chr1_41223012_41223032	TGGGAGAGGGTTGTTTACTCC	1	21	10955	plus	0.224824	0.224824	0.224824	hsa-mir-30c-1	chr1_41223012_41223032	55.982	-0.211456	0.130875	2.62557	0.105155	0.418905	0.980991	0.00296912	0.89858	0.0159751	0.620345	0.00298628
chr1_41223001_41223035	chr1_41223012_41223033	TGGGAGAGGGTTGTTTACTCCT	1	22	1570	plus	0.154646	0.154646	0.154646	hsa-mir-30c-1	chr1_41223012_41223033	7.84229	-0.591774	0.219866	7.03738	0.00798258	0.11251	0.570196	0.118551	0.392786	-0.180618	0.135771	0.0158849
chr1_41223001_41223035	chr1_41223012_41223034	TGGGAGAGGGTTGTTTACTCCTT	1	23	718	plus	0.0526462	0.0526462	0.0526462	hsa-mir-30c-1	chr1_41223012_41223034	3.64274	-0.489171	0.348151	1.9469	0.162921	NA	0.606963	-0.169327	0.589808	0.186046	0.824939	0.003525
chr1_41810640_41810702	chr1_41810654_41810668	CTTCCAGGAAAAGCC	25	15	585	plus	0.422961	0.426375	0.422961	chr1_41810654_41810668	chr1_41810654_41810668	2.56394	1.22244	0.325734	12.8873	0.000330817	NA	0.574549	-0.182458	0.428328	0.247753	0.825224	-0.00335319
chr1_41810640_41810702	chr1_41810654_41810670	CTTCCAGGAAAAGCCAC	3	17	2103	plus	0.407155	0.434011	0.407155	chr1_41810654_41810670	chr1_41810654_41810670	9.39712	1.50477	0.352255	17.5602	2.78348e-05	0.00450651	0.0104019	-0.926039	0.0173296	0.835546	0.0817672	-0.0335594
chr1_41810640_41810702	chr1_41810654_41810671	CTTCCAGGAAAAGCCACT	1	18	759	plus	0.406112	0.41469	0.406112	chr1_41810654_41810671	chr1_41810654_41810671	3.31748	0.809995	0.34386	5.35919	0.0206133	NA	0.0212215	-0.776884	0.11209	0.529411	0.478967	-0.0108966
chr1_41810640_41810702	chr1_41810654_41810672	CTTCCAGGAAAAGCCACTA	1	19	2683	plus	0.572108	0.559766	0.572108	chr1_41810654_41810672	chr1_41810654_41810672	11.7076	1.00719	0.292559	11.2406	0.000800291	0.032332	0.395323	-0.235321	0.666576	-0.119639	0.339661	-0.0141738
chr1_41810640_41810702	chr1_41810654_41810673	CTTCCAGGAAAAGCCACTAA	1	20	1608	plus	0.503596	0.502482	0.503596	chr1_41810654_41810673	chr1_41810654_41810673	7.29014	0.937814	0.314952	8.40964	0.00373236	0.0751412	0.336908	-0.286428	0.457718	0.223458	0.243741	-0.0184281
chr1_41810640_41810702	chr1_41810655_41810670	TTCCAGGAAAAGCCAC	7	16	2788	plus	0.664715	0.665048	0.664715	chr1_41810655_41810670	chr1_41810655_41810670	11.8057	1.79907	0.373302	20.0322	7.61474e-06	0.0023426	0.0751806	-0.694647	0.0608288	0.686707	0.137275	-0.0299967
chr1_41810640_41810702	chr1_41810655_41810671	TTCCAGGAAAAGCCACT	1	17	3969	plus	0.692443	0.687531	0.692443	chr1_41810655_41810671	chr1_41810655_41810671	16.1498	1.49221	0.369261	14.9061	0.000113	0.0102618	0.168712	-0.503283	0.31818	0.368158	0.989601	0.00024613
chr1_41810640_41810702	chr1_41810655_41810672	TTCCAGGAAAAGCCACTA	1	18	15159	plus	0.700933	0.685759	0.700933	chr1_41810655_41810672	chr1_41810655_41810672	62.1719	1.35394	0.348629	13.9749	0.000185264	0.0136175	0.446203	-0.256576	0.788158	0.0930018	0.762761	-0.00536536
chr1_41810640_41810702	chr1_41810655_41810673	TTCCAGGAAAAGCCACTAA	1	19	6860	plus	0.727926	0.711079	0.727926	chr1_41810655_41810673	chr1_41810655_41810673	28.8024	1.26077	0.313498	15.1263	0.000100554	0.00945535	0.223971	-0.367705	0.656835	0.136712	0.285789	-0.0173967
chr1_41810640_41810702	chr1_41810656_41810670	TCCAGGAAAAGCCAC	20	15	2103	plus	0.551198	0.544822	0.551198	chr1_41810656_41810670	chr1_41810656_41810670	9.03428	1.76318	0.421296	15.7919	7.07054e-05	0.00740312	0.154283	-0.63353	0.0042958	1.22109	0.224497	-0.0286295
chr1_41810640_41810702	chr1_41810656_41810671	TCCAGGAAAAGCCACT	3	16	1523	plus	0.676616	0.638463	0.676616	chr1_41810656_41810671	chr1_41810656_41810671	6.07312	1.31576	0.398929	9.86296	0.00168639	0.0478233	0.12459	-0.608875	0.5602	0.233581	0.697032	-0.00795731
chr1_41810640_41810702	chr1_41810656_41810672	TCCAGGAAAAGCCACTA	1	17	4961	plus	0.763338	0.729648	0.763338	chr1_41810656_41810672	chr1_41810656_41810672	20.4995	1.52673	0.367221	16.1889	5.73277e-05	0.006432	0.266159	-0.399866	0.343193	0.354708	0.697854	-0.00749975
chr1_41810640_41810702	chr1_41810656_41810673	TCCAGGAAAAGCCACTAA	1	18	4404	plus	0.636672	0.629847	0.636672	chr1_41810656_41810673	chr1_41810656_41810673	19.1605	1.57137	0.342362	19.3924	1.0643e-05	0.00297352	0.0327776	-0.724963	0.05272	0.645416	0.0846742	-0.0315817
chr1_41810640_41810702	chr1_41810657_41810672	CCAGGAAAAGCCACTA	1	16	1226	plus	0.634597	0.605108	0.634597	chr1_41810657_41810672	chr1_41810657_41810672	5.12937	1.41024	0.361838	13.7064	0.000213725	0.01489	0.0791736	-0.632857	0.183598	0.473662	0.271942	-0.0196811
chr1_41810640_41810702	chr1_41810657_41810673	CCAGGAAAAGCCACTAA	1	17	1384	plus	0.635939	0.548903	0.635939	chr1_41810657_41810673	chr1_41810657_41810673	5.72649	1.36574	0.364893	13.2121	0.000278152	0.0171527	0.0746462	-0.657604	0.0569915	0.682081	0.264465	-0.022196
chr1_43830317_43830384	chr1_43830358_43830381	TTCTCCACCTCATTCTCCCCTCAA	1	24	394	minus	0.0282986	0.0282986	0.0282986	chr1_43830358_43830381	chr1_43830358_43830381	2.0143	-0.0316384	0.453655	0.00440814	0.947064	NA	0.325819	0.414878	0.222106	0.556308	0.0271512	0.0455857
chr1_43830317_43830384	chr1_43830359_43830380	TCTCCACCTCATTCTCCCCTCA	1	22	3820	minus	0.0345637	0.0329839	0.0345637	chr1_43830359_43830380	chr1_43830359_43830380	19.9889	-0.171903	0.164519	1.07044	0.300845	0.662689	0.0473919	0.306885	0.550017	-0.0938744	0.12792	0.0108416
chr1_43830317_43830384	chr1_43830359_43830381	TCTCCACCTCATTCTCCCCTCAA	1	23	9291	minus	0.207534	0.207534	0.207534	chr1_43830359_43830381	chr1_43830359_43830381	49.5974	0.0967428	0.15567	0.376019	0.539741	0.82071	0.0376226	0.306956	0.686579	-0.0596803	0.13461	0.0102156
chr1_43830317_43830384	chr1_43830360_43830380	CTCCACCTCATTCTCCCCTCA	2	21	3033	minus	0.107844	0.102945	0.107844	chr1_43830360_43830380	chr1_43830360_43830380	15.6826	-0.0660183	0.173081	0.144311	0.704033	0.899081	0.26348	0.183043	0.709949	0.061536	0.0840686	0.0129069
chr1_43830317_43830384	chr1_43830360_43830381	CTCCACCTCATTCTCCCCTCAA	1	22	11134	minus	0.179283	0.1771	0.179283	chr1_43830360_43830381	chr1_43830360_43830381	59.6236	0.124588	0.16703	0.538466	0.463069	0.777796	0.0217074	0.369798	0.888286	-0.0224116	0.00887144	0.0193261
chr1_43830317_43830384	chr1_43830360_43830382	CTCCACCTCATTCTCCCCTCAAG	1	23	874	minus	0.10134	0.0739826	0.10134	chr1_43830360_43830382	chr1_43830360_43830382	4.47585	-0.0470531	0.303646	0.023712	0.87762	0.962629	0.454821	-0.222773	0.26305	-0.330673	0.340347	0.0130097
chr1_43830317_43830384	chr1_43830361_43830381	TCCACCTCATTCTCCCCTCAA	1	21	828	minus	0.142291	0.139357	0.142291	chr1_43830361_43830381	chr1_43830361_43830381	4.70485	0.444159	0.380361	1.22817	0.267763	0.631158	0.709816	0.13989	0.353095	-0.343325	0.990204	0.000243576
chr1_43830317_43830384	chr1_43830362_43830381	CCACCTCATTCTCCCCTCAA	1	20	659	minus	0.0851815	0.0619222	0.0851815	chr1_43830362_43830381	chr1_43830362_43830381	3.48905	-0.0796104	0.393375	0.0407394	0.840042	NA	0.3093	0.387968	0.839875	-0.0788713	0.939953	-0.00144242
chr1_43830317_43830384	chr1_43830362_43830383	CCACCTCATTCTCCCCTCAAGT	1	22	553	minus	NA	0.0537427	Inf	chr1_43830362_43830383	chr1_43830362_43830383	3.01276	0.140349	0.390232	0.118023	0.731189	NA	0.283672	0.420552	0.857684	0.0685476	0.37635	-0.0148959
chr1_44619115_44619153	chr1_44619120_44619138	AAGTTCTGATAACCCACTA	36	19	112883	minus	0.39465	0.235564	0.389734	chr1_44619120_44619138	chr1_44619120_44619138	563.034	0.152604	0.142794	1.12219	0.289447	0.653623	0.0179991	-0.322891	0.000120852	0.536025	0.297989	-0.00673912
chr1_44619115_44619153	chr1_44619120_44619139	AAGTTCTGATAACCCACTAC	32	20	43998	minus	0.225977	0.184198	0.225861	chr1_44619120_44619139	chr1_44619120_44619139	223.189	0.0996026	0.133017	0.555269	0.456173	0.77431	0.314181	-0.127268	0.0117396	0.326472	0.20785	-0.00728356
chr1_44619115_44619153	chr1_44619120_44619141	AAGTTCTGATAACCCACTACCA	30	22	60240	minus	0.360362	0.287973	0.360362	chr1_44619120_44619141	chr1_44619120_44619141	306.108	-0.289569	0.148529	3.9599	0.0465966	0.279304	0.772734	0.0411119	0.0139919	0.359178	0.0946408	-0.0109848
chr1_44619115_44619153	chr1_44619121_44619137	AGTTCTGATAACCCACT	40	17	59825	minus	0.590823	0.478683	0.583029	chr1_44619121_44619137	chr1_44619121_44619137	282.721	0.165903	0.15422	1.22253	0.268865	0.631158	0.0107596	-0.377797	0.00369339	0.43649	0.170081	-0.00975832
chr1_44619115_44619153	chr1_44619121_44619138	AGTTCTGATAACCCACTA	37	18	429973	minus	0.572471	0.278594	0.570325	chr1_44619121_44619138	chr1_44619121_44619138	2092.46	0.196553	0.131696	2.24303	0.134218	0.473021	0.00211199	-0.390818	3.44206e-05	0.532324	0.0567903	-0.0113055
chr1_44619115_44619153	chr1_44619121_44619139	AGTTCTGATAACCCACTAC	33	19	353859	minus	0.438825	0.35666	0.402963	chr1_44619121_44619139	chr1_44619121_44619139	1779.23	0.0765677	0.116836	0.431076	0.511462	0.803202	0.747494	-0.0358145	0.00213357	0.346312	0.378114	-0.00461581
chr1_44619115_44619153	chr1_44619121_44619140	AGTTCTGATAACCCACTACC	31	20	176377	minus	0.582337	0.463856	0.582337	chr1_44619121_44619140	chr1_44619121_44619140	898.821	-0.179257	0.12264	2.15182	0.142401	0.484155	0.27907	0.125862	0.0362607	0.248179	0.636334	0.00259158
chr1_44619115_44619153	chr1_44619121_44619141	AGTTCTGATAACCCACTACCA	31	21	643618	minus	0.72425	0.517787	0.63746	chr1_44619121_44619141	chr1_44619121_44619141	3273.53	-0.334572	0.12628	7.19315	0.00731824	0.105515	0.175452	0.162744	0.0522889	0.237668	0.611725	0.00286047
chr1_44619115_44619153	chr1_44619121_44619142	AGTTCTGATAACCCACTACCAT	29	22	351556	minus	0.800903	0.75931	0.800319	chr1_44619121_44619142	chr1_44619121_44619142	1794.27	-0.354961	0.127132	7.93987	0.00483573	0.0856135	0.12861	0.183374	0.0641857	0.227889	0.472086	0.00407603
chr1_44619115_44619153	chr1_44619122_44619137	GTTCTGATAACCCACT	43	16	79949	minus	0.430101	0.279599	0.368531	chr1_44619122_44619137	chr1_44619122_44619137	371.842	0.211266	0.17342	1.5133	0.218637	0.582294	0.0086825	-0.443282	0.0302019	0.363784	0.400104	-0.0069163
chr1_44619115_44619153	chr1_44619122_44619138	GTTCTGATAACCCACTA	39	17	253034	minus	0.539106	0.233409	0.502153	chr1_44619122_44619138	chr1_44619122_44619138	1205.37	-0.02351	0.15252	0.0243616	0.875968	0.962035	0.000639081	-0.505777	0.000799367	0.497169	0.18262	-0.00921016
chr1_44619115_44619153	chr1_44619122_44619139	GTTCTGATAACCCACTAC	35	18	257453	minus	0.541491	0.253067	0.502228	chr1_44619122_44619139	chr1_44619122_44619139	1256.59	0.123318	0.116279	1.14833	0.283898	0.649601	0.00433682	-0.317881	0.00162818	0.354161	0.203016	-0.00666204
chr1_44619115_44619153	chr1_44619122_44619140	GTTCTGATAACCCACTACC	31	19	123597	minus	0.51327	0.43591	0.486732	chr1_44619122_44619140	chr1_44619122_44619140	615.229	-0.0945681	0.106277	0.805469	0.369463	0.721173	0.652109	-0.0453827	0.0337681	0.217079	0.690393	0.00192529
chr1_44619115_44619153	chr1_44619122_44619141	GTTCTGATAACCCACTACCA	31	20	270685	minus	0.699014	0.568993	0.647484	chr1_44619122_44619141	chr1_44619122_44619141	1362.18	-0.255436	0.107169	5.74661	0.0165205	0.161201	0.732742	0.0345481	0.0827244	0.178349	0.0811631	0.00847385
chr1_44619115_44619153	chr1_44619122_44619142	GTTCTGATAACCCACTACCAT	29	21	322632	minus	0.716005	0.684889	0.691327	chr1_44619122_44619142	chr1_44619122_44619142	1652.36	-0.263846	0.113894	5.41283	0.0199893	0.179268	0.439018	0.0831597	0.233439	0.1303	0.0309391	0.0111487
chr1_45187203_45187272	chr1_45187211_45187232	AGCTTCCTAAATGTTTACAAGA	1	22	1951	minus	0.016016	0.015991	0.016016	chr1_45187211_45187232	chr1_45187211_45187232	9.87697	-0.0500937	0.185349	0.074121	0.785428	0.929063	0.714043	-0.0641583	0.0050853	0.50157	0.706141	0.00326636
chr1_45187203_45187272	chr1_45187211_45187233	AGCTTCCTAAATGTTTACAAGAA	1	23	5594	minus	0.0547095	0.0539469	0.0547095	chr1_45187211_45187233	chr1_45187211_45187233	29.6202	-0.421247	0.147396	7.97906	0.00473215	0.0856135	0.00942261	0.367027	0.857123	-0.0252034	0.274357	0.00716313
chr1_45187203_45187272	chr1_45187211_45187234	AGCTTCCTAAATGTTTACAAGAAG	1	24	612	minus	0.0183155	0.0182591	0.0183155	chr1_45187211_45187234	chr1_45187211_45187234	3.06085	0.309266	0.364093	0.71892	0.396498	NA	0.376133	0.308924	0.724731	0.123806	0.354725	-0.0170412
chr1_45187203_45187272	chr1_45187212_45187232	GCTTCCTAAATGTTTACAAGA	1	21	574	minus	0.0324137	0.0314177	0.0324137	chr1_45187212_45187232	chr1_45187212_45187232	3.12057	-0.216499	0.361639	0.354306	0.551686	NA	0.0534221	0.681332	0.967275	-0.0143083	0.831704	0.0037556
chr1_45187203_45187272	chr1_45187212_45187233	GCTTCCTAAATGTTTACAAGAA	1	22	12284	minus	0.0921915	0.0887719	0.0921915	chr1_45187212_45187233	chr1_45187212_45187233	64.9741	0.189571	0.147787	1.62266	0.202721	0.563416	0.167881	0.194108	0.736382	-0.0475291	0.0674663	0.0125665
chr1_45187203_45187272	chr1_45187213_45187232	CTTCCTAAATGTTTACAAGA	1	20	323	minus	0.0323694	0.0304944	0.0323694	chr1_45187213_45187232	chr1_45187213_45187232	1.72498	0.347112	0.442539	0.583722	0.444857	NA	0.0158743	1.08665	0.61818	-0.206522	1	-0.0035587
chr1_45187203_45187272	chr1_45187213_45187233	CTTCCTAAATGTTTACAAGAA	1	21	6043	minus	0.213072	0.184474	0.213072	chr1_45187213_45187233	chr1_45187213_45187233	33.0137	-0.120284	0.217364	0.29825	0.584982	0.842324	0.00663565	0.581052	0.930668	-0.0181971	0.0739015	0.0175116
chr1_45187203_45187272	chr1_45187213_45187235	CTTCCTAAATGTTTACAAGAAGC	1	23	325	minus	0.0134976	8.51633e-05	0.0134976	chr1_45187213_45187235	chr1_45187213_45187235	1.74495	-0.353673	0.488345	0.52455	0.468907	NA	0.0610975	0.864699	0.367375	0.429513	0.668951	0.00999262
chr1_45187203_45187272	chr1_45187215_45187235	TCCTAAATGTTTACAAGAAGC	1	21	922	minus	1	1	1	chr1_45187215_45187235	chr1_45187215_45187235	4.7746	-0.187904	0.282995	0.42956	0.512205	0.8041	0.0278552	0.592104	0.292041	0.29179	0.444635	0.0103345
chr1_65524121_65524185	chr1_65524124_65524145	CTTCAGTTATCACAGTACTGTA	2	22	3630612	minus	0.314254	0.314254	0.314254	hsa-mir-101-1	chr1_65524124_65524145	19297.3	-0.234964	0.132486	3.06271	0.0801082	0.369253	0.00389354	0.36403	0.145098	-0.183492	0.609891	0.00297344
chr1_65524121_65524185	chr1_65524125_65524145	TTCAGTTATCACAGTACTGTA	2	21	175047	minus	0.597583	0.597583	0.582406	hsa-mir-101-1	chr1_65524125_65524145	926.711	0.0327756	0.17095	0.0351456	0.851291	0.954535	0.00564348	0.447027	0.174608	-0.220032	0.823461	0.00169066
chr1_65524121_65524185	chr1_65524125_65524146	TTCAGTTATCACAGTACTGTAC	2	22	74218	minus	0.366174	0.366174	0.351234	hsa-mir-101-1	chr1_65524125_65524146	387.325	-0.121099	0.127133	0.902366	0.342148	0.702619	0.00022257	0.443105	0.0183243	-0.28478	0.801346	-0.00141468
chr1_65524121_65524185	chr1_65524126_65524145	TCAGTTATCACAGTACTGTA	2	20	205814	minus	0.875927	0.875927	0.525198	hsa-mir-101-1	chr1_65524126_65524145	1078.19	0.0821636	0.190058	0.175171	0.675557	0.882984	0.0496544	0.352792	0.302647	-0.18617	0.677836	-0.00357669
chr1_65524121_65524185	chr1_65524126_65524146	TCAGTTATCACAGTACTGTAC	2	21	1248556	minus	0.844549	0.844549	0.345959	hsa-mir-101-1	chr1_65524126_65524146	6524.27	0.103667	0.172797	0.343478	0.557828	0.828065	0.0136892	0.400017	0.271238	-0.179952	0.710895	0.0028838
chr1_67919237_67919258	chr1_67919241_67919257	CATTGAACTATTCCCCA	1	17	30549	minus	0.828634	0.828634	0.828634	chr1_67919241_67919257	chr1_67919241_67919257	132.124	-0.257532	0.234933	1.21154	0.271028	0.63421	0.247283	-0.266144	0.18656	0.299747	0.167771	-0.0163632
chr1_67919237_67919258	chr1_67919242_67919257	ATTGAACTATTCCCCA	4	16	29873	minus	0.829904	0.829904	0.829904	chr1_67919242_67919257	chr1_67919242_67919257	127.779	-0.0228019	0.275353	0.00659744	0.935263	0.978699	0.21659	-0.34262	0.106391	0.432904	0.242921	-0.0164458
chr1_67919237_67919258	chr1_67919243_67919257	TTGAACTATTCCCCA	10	15	2596	minus	0.6741	0.6741	0.6741	chr1_67919243_67919257	chr1_67919243_67919257	11.4012	0.227591	0.252646	0.768946	0.380543	0.729667	0.227597	-0.305239	0.0857706	0.422685	0.53806	-0.00789461
chr1_71533321_71533387	chr1_71533362_71533385	AAAGCCCAAAAGGAGAATTCTTTG	1	24	35405	minus	0.172925	0.172925	0.172925	hsa-mir-186	chr1_71533362_71533385	182.67	-0.423312	0.143761	8.68803	0.00320307	0.0693291	0.138438	0.201454	0.96025	-0.0069205	0.371535	0.0058024
chr1_71533321_71533387	chr1_71533363_71533385	AAGCCCAAAAGGAGAATTCTTTG	1	23	160420	minus	0.00781648	0.00781648	0.00781648	hsa-mir-186	chr1_71533363_71533385	832.393	-0.414538	0.130854	10.1217	0.00146534	0.0443339	0.0537238	0.237374	0.777618	-0.0353471	0.357666	0.00550469
chr1_71533321_71533387	chr1_71533364_71533385	AGCCCAAAAGGAGAATTCTTTG	1	22	492948	minus	0.483919	0.483919	0.483919	hsa-mir-186	chr1_71533364_71533385	2627	-0.147488	0.115673	1.57513	0.209464	0.571491	0.000127501	0.423085	0.290089	-0.11635	0.764564	0.0015083
chr1_71533321_71533387	chr1_71533365_71533385	GCCCAAAAGGAGAATTCTTTG	1	21	818042	minus	0.779537	0.779537	0.779537	hsa-mir-186	chr1_71533365_71533385	4413.91	0.0472273	0.136991	0.112934	0.736828	0.910299	0.0025934	0.397058	0.851503	-0.0245282	0.463041	0.004453
chr1_71533321_71533387	chr1_71533366_71533385	CCCAAAAGGAGAATTCTTTG	1	20	1148842	minus	0.811222	0.811222	0.811222	hsa-mir-186	chr1_71533366_71533385	6225.03	0.06084	0.161462	0.133815	0.714509	0.901925	0.0190877	0.366456	0.817879	-0.0359466	0.317686	0.00721178
chr1_89419043_89419067	chr1_89419045_89419061	TGGTGAAATGCTGTCTC	346	17	70887	minus	0.969639	0.944494	0.969639	chr1_89419045_89419061	chr1_89419045_89419061	362.283	0.865412	0.974509	0.574424	0.448506	0.769723	0.511057	0.675857	0.585512	-0.539974	0.240083	-0.0499504
chr1_89419043_89419067	chr1_89419045_89419062	TGGTGAAATGCTGTCTCT	331	18	246892	minus	0.973407	0.960857	0.973381	chr1_89419045_89419062	chr1_89419045_89419062	1264.08	0.548272	1.0345	0.220081	NA	NA	NA	0.6916	NA	-0.380809	NA	-0.0347503
chr1_89419043_89419067	chr1_89419045_89419063	TGGTGAAATGCTGTCTCTA	316	19	583783	minus	0.97751	0.976631	0.976813	chr1_89419045_89419063	chr1_89419045_89419063	3234.43	0.115627	1.04809	0.00964322	0.921774	0.974051	0.385646	0.875172	0.722032	-0.357943	0.552097	-0.025032
chr1_89419043_89419067	chr1_89419045_89419064	TGGTGAAATGCTGTCTCTAT	14	20	1435879	minus	0.978138	0.97128	0.972807	chr1_89419045_89419064	chr1_89419045_89419064	8202.75	-0.194396	0.961491	0.031381	0.859393	0.956995	0.37727	0.812872	0.590632	-0.500779	0.595573	-0.0202522
chr1_91852770_91853149	chr1_91852805_91852824	GGGTGAACAATCCAACGCTT	1	20	29235	minus	1	1	1	chr1_91852805_91852824	chr1_91852805_91852824	138.947	0.738823	0.203023	12.7635	0.00035345	0.0198105	0.288769	-0.205103	0.147474	-0.28062	0.409443	0.00796806
chr1_91852770_91853149	chr1_91852848_91852869	AGGAAGAGCCGACATCGAAGGA	1	22	38191	minus	0.6562	0.6562	0.6562	chr1_91852848_91852869	chr1_91852848_91852869	178.976	0.687774	0.251352	7.4866	0.00621598	0.097616	0.0063647	-0.689612	0.667465	0.103547	0.89361	-0.00140438
chr1_91852770_91853149	chr1_91852849_91852869	GGAAGAGCCGACATCGAAGGA	1	21	32695	minus	0.6562	0.6562	0.6562	chr1_91852849_91852869	chr1_91852849_91852869	155.634	0.804814	0.239162	11.4858	0.000701316	0.0300435	0.0264739	-0.540896	0.582768	-0.124879	0.199738	-0.0140464
chr1_93981812_93981913	chr1_93981852_93981871	AACCGGGGACCTCTTGATCT	13	20	124612	minus	0.658593	0.641807	0.658593	chr1_93981852_93981871	chr1_93981852_93981871	614.528	-0.0759605	0.120633	0.389603	0.532508	0.818292	0.480036	0.0800063	0.109594	0.184376	0.680935	0.00227429
chr1_93981812_93981913	chr1_93981853_93981869	ACCGGGGACCTCTTGAT	14	17	51984	minus	0.732456	0.37878	0.732456	chr1_93981853_93981869	chr1_93981853_93981869	241.621	0.195378	0.151731	1.66257	0.197257	0.557844	0.0164557	-0.349692	0.00236271	0.442423	0.16518	-0.00960424
chr1_93981812_93981913	chr1_93981853_93981870	ACCGGGGACCTCTTGATC	13	18	29403	minus	0.679525	0.592902	0.677734	chr1_93981853_93981870	chr1_93981853_93981870	140.462	0.106641	0.130885	0.656535	0.417786	0.753865	0.0389403	-0.257773	0.00295255	0.37385	0.337972	-0.00565205
chr1_93981812_93981913	chr1_93981853_93981871	ACCGGGGACCTCTTGATCT	13	19	1594381	minus	0.700569	0.623369	0.698968	chr1_93981853_93981871	chr1_93981853_93981871	7751.2	0.0406713	0.110416	0.134597	0.713712	0.901774	0.622315	-0.0513587	0.0144609	0.257845	0.995755	-2.69124e-05
chr1_93981812_93981913	chr1_93981853_93981872	ACCGGGGACCTCTTGATCTG	13	20	233715	minus	0.726522	0.714209	0.726447	chr1_93981853_93981872	chr1_93981853_93981872	1155.82	0.0636968	0.106269	0.35311	0.552358	0.826529	0.499792	0.067411	0.149263	0.146195	0.340228	0.0045859
chr1_93981812_93981913	chr1_93981853_93981873	ACCGGGGACCTCTTGATCTGC	13	21	129832	minus	0.815256	0.543365	0.815256	chr1_93981853_93981873	chr1_93981853_93981873	646.523	-0.082656	0.119444	0.470777	0.49263	0.792264	0.469519	0.0810541	0.460039	0.084085	0.130967	0.00818306
chr1_93981812_93981913	chr1_93981853_93981875	ACCGGGGACCTCTTGATCTGCAG	13	23	99805	minus	NA	0.541111	Inf	chr1_93981853_93981875	chr1_93981853_93981875	495.202	-0.01759	0.100748	0.0298662	0.862794	0.957942	0.402415	0.0790079	0.405172	0.0797381	0.0949104	0.00760241
chr1_93981812_93981913	chr1_93981853_93981878	ACCGGGGACCTCTTGATCTGCAGTCA	13	26	73968	minus	0.699315	0.699315	0.699315	chr1_93981853_93981878	chr1_93981853_93981878	356.245	-0.0933407	0.121489	0.589278	0.442699	0.768159	0.620809	0.0565042	0.711976	0.0425492	0.207284	0.00692847
chr1_93981812_93981913	chr1_93981853_93981879	ACCGGGGACCTCTTGATCTGCAGTCAA	13	27	47375	minus	0.699315	0.682751	0.699315	chr1_93981853_93981879	chr1_93981853_93981879	225.299	0.244403	0.135609	3.25873	0.0710442	0.350094	0.843922	0.0250887	0.836525	0.0265243	0.86517	-0.00105267
chr1_93981812_93981913	chr1_93981853_93981882	ACCGGGGACCTCTTGATCTGCAGTCAAATG	13	30	38878	minus	NA	NA	Inf	chr1_93981853_93981882	chr1_93981853_93981882	183.784	0.172307	0.132701	1.68004	0.19492	0.553621	0.783923	0.0343352	0.179351	0.170368	0.823923	-0.00132622
chr1_94312392_94312496	chr1_94312399_94312422	CCCCTCAGTCCACCAGAGCCCGGA	1	24	229	plus	1	1	1	hsa-mir-760	chr1_94312399_94312422	1.15515	-0.050897	0.491755	0.00792116	0.929081	NA	0.755533	-0.147999	0.439645	0.369751	0.403522	0.01816
chr1_94312392_94312496	chr1_94312416_94312430	GCCCGGATACCTCAG	1	15	345	plus	1	1	1	hsa-mir-760	chr1_94312416_94312430	1.6129	0.0645056	0.366578	0.0297146	0.863139	NA	0.873961	0.0545985	0.838714	0.0730822	0.472945	0.0123949
chr1_94312392_94312496	chr1_94312435_94312453	TCGGCTCTGGGTCTGTGGG	1	19	279	plus	0.00206116	0.00206116	0.00206116	hsa-mir-760	chr1_94312435_94312453	1.40467	0.882119	0.463695	3.63935	0.0564291	NA	0.631114	0.224283	0.996859	-0.0160125	0.555765	-0.0120943
chr1_94312392_94312496	chr1_94312435_94312454	TCGGCTCTGGGTCTGTGGGG	1	20	820	plus	0.0173699	0.0173699	0.0173699	hsa-mir-760	chr1_94312435_94312454	4.0606	0.0444622	0.313224	0.0212973	0.883972	NA	0.882258	-0.0448639	0.425123	-0.246887	0.827381	0.00313068
chr1_94312392_94312496	chr1_94312435_94312455	TCGGCTCTGGGTCTGTGGGGA	1	21	516	plus	0.0114396	0.0114396	0.0114396	hsa-mir-760	chr1_94312435_94312455	2.51388	-1.14586	0.417852	6.88294	0.00870225	NA	0.530547	0.253841	0.840344	0.0831068	0.0880688	0.0342171
chr1_94312392_94312496	chr1_94312435_94312456	TCGGCTCTGGGTCTGTGGGGAG	1	22	4016	plus	0.090719	0.090719	0.090719	hsa-mir-760	chr1_94312435_94312456	20.0846	0.0347102	0.156004	0.0491727	0.824509	0.944717	0.891783	0.0198338	0.500746	-0.0997046	0.805113	0.00172363
chr1_94312392_94312496	chr1_94312436_94312454	CGGCTCTGGGTCTGTGGGG	1	19	1142	plus	0.0517453	0.0517453	0.0517453	hsa-mir-760	chr1_94312436_94312454	5.44091	-0.309075	0.20168	2.49987	0.113856	0.437434	0.431611	-0.149791	0.732407	0.0664898	0.385726	0.0081163
chr1_94312392_94312496	chr1_94312436_94312455	CGGCTCTGGGTCTGTGGGGA	1	20	1728	plus	0.00627247	0.00627247	0.00627247	hsa-mir-760	chr1_94312436_94312455	8.18019	-0.310268	0.226785	1.98928	0.158416	0.507361	0.195997	-0.282095	0.443707	0.170396	0.90856	0.00123155
chr1_94312392_94312496	chr1_94312436_94312456	CGGCTCTGGGTCTGTGGGGAG	1	21	12559	plus	0.0603627	0.0603627	0.0603627	hsa-mir-760	chr1_94312436_94312456	62.1377	0.0231807	0.110298	0.0454546	0.83117	0.947244	0.357913	0.0952075	0.593301	-0.0559867	0.098113	0.00817172
chr1_94312392_94312496	chr1_94312436_94312457	CGGCTCTGGGTCTGTGGGGAGC	1	22	444	plus	0.0131943	0.0131943	0.0131943	hsa-mir-760	chr1_94312436_94312457	2.07204	0.00239149	0.359384	2.30045e-05	0.996173	NA	0.374861	0.301039	0.771627	-0.0985234	0.389259	-0.0145837
chr1_94313121_94313245	chr1_94313129_94313146	GGCTCCGTGGCGCAATGG	1	18	41905	plus	0.376586	0.376586	0.376586	chr1_94313129_94313146	chr1_94313129_94313146	201.908	0.127389	0.105279	1.43188	0.231458	0.601068	0.000409434	-0.357926	0.0120474	0.253331	0.0694193	-0.00857177
chr1_94313121_94313245	chr1_94313129_94313147	GGCTCCGTGGCGCAATGGA	1	19	29111	plus	0.349614	0.349614	0.349614	chr1_94313129_94313147	chr1_94313129_94313147	140.499	0.123581	0.111911	1.15681	0.282129	0.648261	0.00645232	-0.291487	0.164147	0.149982	0.761123	-0.00157044
chr1_94313121_94313245	chr1_94313129_94313148	GGCTCCGTGGCGCAATGGAT	1	20	3440	plus	0.0325642	0.0325642	0.0325642	chr1_94313129_94313148	chr1_94313129_94313148	16.521	-0.00988159	0.168568	0.00346644	0.95305	0.982558	0.706945	0.0603739	0.732512	0.0551016	0.949788	0.000474895
chr1_94313121_94313245	chr1_94313129_94313149	GGCTCCGTGGCGCAATGGATA	1	21	2509	plus	0.0542106	0.0542106	0.0542106	chr1_94313129_94313149	chr1_94313129_94313149	12.4095	-0.623702	0.186984	10.9488	0.000936621	0.0341929	0.87649	0.0278549	0.523647	0.115792	0.105686	0.0137753
chr1_94313121_94313245	chr1_94313129_94313150	GGCTCCGTGGCGCAATGGATAG	1	22	3786	plus	0.0601698	0.0601698	0.0601698	chr1_94313129_94313150	chr1_94313129_94313150	18.4359	-0.203512	0.147502	1.85965	0.172665	0.523048	0.321106	0.137898	0.553746	-0.0830346	0.738889	-0.00220642
chr1_94313121_94313245	chr1_94313129_94313152	GGCTCCGTGGCGCAATGGATAGCG	1	24	2944	plus	0.104496	0.104496	0.104496	chr1_94313129_94313152	chr1_94313129_94313152	14.7645	-0.0195765	0.173835	0.0120712	0.912513	0.971729	0.418345	0.133338	0.552321	0.0978753	0.939914	-0.000565167
chr1_94313121_94313245	chr1_94313129_94313153	GGCTCCGTGGCGCAATGGATAGCGC	1	25	2346	plus	0.138693	0.138693	0.138693	chr1_94313129_94313153	chr1_94313129_94313153	11.325	0.0630397	0.199225	0.088509	0.766081	0.922868	0.713488	-0.070011	0.110202	0.304415	0.581886	0.00498593
chr1_94313121_94313245	chr1_94313129_94313154	GGCTCCGTGGCGCAATGGATAGCGCA	1	26	2112	plus	0.168909	0.168909	0.168909	chr1_94313129_94313154	chr1_94313129_94313154	10.2179	0.455352	0.196411	4.96672	0.0258396	0.206106	0.0485055	-0.368594	0.562652	-0.108373	0.135722	-0.0131849
chr1_94313121_94313245	chr1_94313129_94313155	GGCTCCGTGGCGCAATGGATAGCGCAT	1	27	3235	plus	0.204637	0.204637	0.204637	chr1_94313129_94313155	chr1_94313129_94313155	15.3425	0.347166	0.161908	4.54317	0.0330503	0.233799	0.0149797	-0.372697	0.58534	0.083754	0.533371	-0.00449767
chr1_94313121_94313245	chr1_94313129_94313156	GGCTCCGTGGCGCAATGGATAGCGCATT	1	28	1981	plus	0.198419	0.198419	0.198419	chr1_94313129_94313156	chr1_94313129_94313156	9.21467	0.196828	0.166314	1.37044	0.241736	0.610921	0.149877	-0.225472	0.895112	0.0209569	0.408626	0.00608621
chr1_94313121_94313245	chr1_94313140_94313157	GCAATGGATAGCGCATTG	8	18	2053	plus	0.110204	0.110204	0.110204	chr1_94313140_94313157	chr1_94313140_94313157	9.5523	0.173242	0.213103	0.644392	0.422125	0.755336	0.0261266	-0.459585	0.0787541	0.361469	0.638701	-0.00476295
chr1_94313121_94313245	chr1_94313140_94313158	GCAATGGATAGCGCATTGG	8	19	11019	plus	0.0611736	0.0611736	0.0611736	chr1_94313140_94313158	chr1_94313140_94313158	53.4361	0.0649071	0.146448	0.195477	0.658397	0.872403	0.0269149	-0.31293	0.00575324	0.392124	0.532944	0.00405485
chr1_94313121_94313245	chr1_94313140_94313159	GCAATGGATAGCGCATTGGA	8	20	35548	plus	0.0903764	0.0903764	0.0903764	chr1_94313140_94313159	chr1_94313140_94313159	170.917	0.208225	0.106664	3.70869	0.0541299	0.301787	0.124667	-0.155538	0.021707	0.23408	0.514886	0.00324626
chr1_94313121_94313245	chr1_94313141_94313159	CAATGGATAGCGCATTGGA	8	19	5233	plus	0.137533	0.137533	0.137533	chr1_94313141_94313159	chr1_94313141_94313159	25.1532	0.276742	0.115492	5.5453	0.0185304	0.171968	0.180501	-0.145716	0.00118887	0.357539	0.855139	-0.000972495
chr1_99358447_99358489	chr1_99358452_99358473	CTCGAGGAGCTCACAGTCTAGT	5	22	402448	plus	0.837725	0.837725	0.714289	chr1_99358452_99358473	chr1_99358452_99358473	2067.84	-0.215512	0.0860445	6.352	0.0117249	0.134377	0.260026	0.0918445	0.57438	-0.0462488	0.661585	0.00169058
chr1_99358447_99358489	chr1_99358453_99358472	TCGAGGAGCTCACAGTCTAG	6	20	779210	plus	0.00647523	0.00647523	0.00647523	chr1_99358453_99358472	chr1_99358453_99358472	4116.01	-0.187745	0.110005	2.86311	0.0906321	0.38867	0.0116403	0.265158	0.24816	0.122259	0.0156886	0.0116848
chr1_99358447_99358489	chr1_99358453_99358473	TCGAGGAGCTCACAGTCTAGT	5	21	20401476	plus	0.0811577	0.0811577	0.0731235	chr1_99358453_99358473	chr1_99358453_99358473	104787	-0.219749	0.0895075	6.10087	0.0135116	0.145591	0.343727	0.0802877	0.971735	0.00303945	0.545856	0.00243098
chr1_108113069_108113144	chr1_108113102_108113123	GGCGCGAGATTTACACCCTCTC	1	22	458	minus	0.0135157	0.0123242	0.0135157	chr1_108113102_108113123	chr1_108113102_108113123	2.24789	0.164875	0.35368	0.224483	0.635645	NA	0.710691	0.122725	0.231643	-0.400143	0.0684666	-0.0265941
chr1_108113069_108113144	chr1_108113102_108113126	GGCGCGAGATTTACACCCTCTCCCC	1	25	462	minus	0.0206378	0.0199964	0.0206378	chr1_108113102_108113126	chr1_108113102_108113126	2.02374	-0.296312	0.387048	0.475132	0.490635	NA	0.578804	-0.201775	0.956653	-0.0198268	0.0246423	0.0433833
chr1_108113069_108113144	chr1_108113102_108113127	GGCGCGAGATTTACACCCTCTCCCCC	1	26	627	minus	0.0175935	0.0175935	0.0175935	chr1_108113102_108113127	chr1_108113102_108113127	2.92307	-0.242359	0.27289	0.788717	0.374488	NA	0.488518	0.179925	0.073349	-0.463707	0.610671	0.00626428
chr1_108113069_108113144	chr1_108113102_108113128	GGCGCGAGATTTACACCCTCTCCCCCG	1	27	597	minus	0.0103502	0.00890704	0.0103502	chr1_108113102_108113128	chr1_108113102_108113128	2.68053	0.048296	0.248673	0.0373548	0.846744	NA	0.434538	0.185765	0.0432256	-0.478706	0.103163	0.0198115
chr1_108113069_108113144	chr1_108113103_108113124	GCGCGAGATTTACACCCTCTCC	1	22	441	minus	0.0062513	0.0158664	0.0062513	chr1_108113103_108113124	chr1_108113103_108113124	2.00444	-0.553089	0.48241	1.22879	0.267642	NA	0.676012	0.201945	0.231063	0.56314	0.585025	0.0125855
chr1_108113069_108113144	chr1_108113103_108113126	GCGCGAGATTTACACCCTCTCCCC	1	24	374	minus	0.00663844	0.0089151	0.00663844	chr1_108113103_108113126	chr1_108113103_108113126	1.69338	-0.220769	0.430576	0.243696	0.621549	NA	0.108087	0.683051	0.524356	-0.274541	0.631997	-0.00986343
chr1_108113069_108113144	chr1_108113103_108113127	GCGCGAGATTTACACCCTCTCCCCC	1	25	774	minus	0.0246311	0.0246311	0.0246311	chr1_108113103_108113127	chr1_108113103_108113127	3.70538	-0.160528	0.298835	0.266936	0.605395	NA	0.0454486	0.580368	0.748957	-0.0918566	0.486594	0.00938555
chr1_108113069_108113144	chr1_108113103_108113128	GCGCGAGATTTACACCCTCTCCCCCG	1	26	996	minus	0.0190032	0.0205074	0.0190032	chr1_108113103_108113128	chr1_108113103_108113128	4.6275	-0.213798	0.253894	0.632128	0.426576	0.759158	0.0116863	0.656892	0.723815	-0.0851452	0.883905	-0.00162886
chr1_108113069_108113144	chr1_108113104_108113123	CGCGAGATTTACACCCTCTC	1	20	505	minus	0.0289896	0.0276061	0.0289896	chr1_108113104_108113123	chr1_108113104_108113123	2.40808	-0.213888	0.545306	0.144946	0.703413	NA	0.922834	0.062619	0.988343	0.00256138	0.0144076	0.0551051
chr1_108113069_108113144	chr1_108113104_108113124	CGCGAGATTTACACCCTCTCC	1	21	590	minus	0.038554	0.0208958	0.038554	chr1_108113104_108113124	chr1_108113104_108113124	2.73308	-0.0237827	0.400366	0.00355146	0.952479	NA	0.446957	0.295135	0.986241	-0.00890135	0.108789	0.0293963
chr1_108113069_108113144	chr1_108113104_108113126	CGCGAGATTTACACCCTCTCCCC	1	23	852	minus	0.0302427	0.0210035	0.0302427	chr1_108113104_108113126	chr1_108113104_108113126	4.08758	-0.369286	0.325174	1.23581	0.266279	NA	0.216406	0.390528	0.436438	0.24915	0.386293	0.0120063
chr1_108113069_108113144	chr1_108113104_108113127	CGCGAGATTTACACCCTCTCCCCC	1	24	1870	minus	0.0250947	0.0250947	0.0250947	chr1_108113104_108113127	chr1_108113104_108113127	8.75345	-0.0657524	0.241169	0.0764597	0.782154	0.927691	0.417981	0.186049	0.486876	-0.160553	0.10262	0.0166922
chr1_108113069_108113144	chr1_108113104_108113128	CGCGAGATTTACACCCTCTCCCCCG	1	25	1900	minus	0.0205043	0.0193765	0.0205043	chr1_108113104_108113128	chr1_108113104_108113128	9.06317	-0.0669181	0.196877	0.104702	0.746258	0.915188	0.0794957	0.326929	0.708719	-0.0701648	0.178134	0.0113956
chr1_108113069_108113144	chr1_108113105_108113126	GCGAGATTTACACCCTCTCCCC	1	22	682	minus	0.0213793	0.0185428	0.0213793	chr1_108113105_108113126	chr1_108113105_108113126	3.43027	-0.409725	0.306041	1.6511	0.198809	NA	0.377853	0.262848	0.555648	0.178151	0.657312	-0.0059031
chr1_108113069_108113144	chr1_108113105_108113127	GCGAGATTTACACCCTCTCCCCC	1	23	1645	minus	0.0230355	0.0230355	0.0230355	chr1_108113105_108113127	chr1_108113105_108113127	8.05028	-0.126024	0.189229	0.459817	0.49771	0.7966	0.847703	-0.0340969	0.360064	-0.165244	0.600786	0.00439335
chr1_108113069_108113144	chr1_108113105_108113128	GCGAGATTTACACCCTCTCCCCCG	1	24	1338	minus	0.0200102	0.0185777	0.0200102	chr1_108113105_108113128	chr1_108113105_108113128	6.48379	-0.0464942	0.208811	0.0491407	0.824565	0.944717	0.383156	-0.170159	0.615045	-0.0991368	0.182361	0.0128
chr1_108113069_108113144	chr1_108113106_108113126	CGAGATTTACACCCTCTCCCC	1	21	451	minus	0.00680952	0.00648239	0.00680952	chr1_108113106_108113126	chr1_108113106_108113126	2.28437	-0.529398	0.363781	2.20754	0.137337	NA	0.00858425	0.911899	0.0537664	-0.664553	0.729895	-0.00568656
chr1_108113069_108113144	chr1_108113106_108113127	CGAGATTTACACCCTCTCCCCC	1	22	1807	minus	0.00901194	0.00901194	0.00901194	chr1_108113106_108113127	chr1_108113106_108113127	8.93195	-0.402497	0.199764	4.22756	0.0397725	0.260775	0.0350406	0.400506	0.660408	0.0840585	0.361431	0.00835248
chr1_108113069_108113144	chr1_108113106_108113128	CGAGATTTACACCCTCTCCCCCG	1	23	2535	minus	0.00795341	0.00837981	0.00795341	chr1_108113106_108113128	chr1_108113106_108113128	12.7641	-0.0273589	0.19228	0.0208393	0.885218	0.965173	0.254128	0.205714	0.526304	0.116781	0.1468	0.0125222
chr1_108113069_108113144	chr1_108113107_108113124	GAGATTTACACCCTCTCC	3	18	525	minus	NA	0.0138129	Inf	chr1_108113107_108113124	chr1_108113107_108113124	2.3739	-0.0572558	0.348511	0.025893	0.872162	NA	0.876039	-0.0519219	0.405773	0.283416	0.952811	0.00088148
chr1_108113069_108113144	chr1_108113107_108113126	GAGATTTACACCCTCTCCCC	3	20	944	minus	0.0181074	0.0192387	0.0181074	chr1_108113107_108113126	chr1_108113107_108113126	4.33122	-0.294005	0.279992	1.10819	0.292476	0.657042	0.461867	-0.199167	0.651042	-0.123114	0.85912	0.00222957
chr1_108113069_108113144	chr1_108113107_108113127	GAGATTTACACCCTCTCCCCC	3	21	1329	minus	0.00828758	0.00828758	0.00828758	chr1_108113107_108113127	chr1_108113107_108113127	6.35205	-0.384662	0.258527	2.17435	0.140329	0.482873	0.748069	-0.077906	0.483192	0.17406	0.41998	-0.0091355
chr1_108113069_108113144	chr1_108113107_108113128	GAGATTTACACCCTCTCCCCCG	2	22	1055	minus	0.0187888	0.0205965	0.0187888	chr1_108113107_108113128	chr1_108113107_108113128	5.21332	-0.438843	0.281207	2.47869	0.115399	0.440487	0.651002	-0.119278	0.422518	0.216318	0.27278	0.0136271
chr1_108113069_108113144	chr1_108113108_108113126	AGATTTACACCCTCTCCCC	3	19	539	minus	0.0207963	0.0202544	0.0207963	chr1_108113108_108113126	chr1_108113108_108113126	2.51443	0.189464	0.381085	0.238755	0.625107	NA	0.826929	0.0826237	0.649373	-0.165125	0.262194	-0.0184946
chr1_108113069_108113144	chr1_108113108_108113127	AGATTTACACCCTCTCCCCC	3	20	742	minus	0.018037	0.018037	0.018037	chr1_108113108_108113127	chr1_108113108_108113127	3.32987	0.130082	0.29838	0.183598	0.668299	NA	0.349816	-0.264636	0.882486	0.0418245	0.183531	0.0174162
chr1_108113069_108113144	chr1_108113108_108113128	AGATTTACACCCTCTCCCCCG	2	21	340	minus	0.00519282	0.00563529	0.00519282	chr1_108113108_108113128	chr1_108113108_108113128	1.58862	-0.143824	0.473478	0.0831158	0.773119	NA	0.0234425	-1.02337	0.922843	0.0446786	0.392398	0.0184655
chr1_108113069_108113144	chr1_108113109_108113126	GATTTACACCCTCTCCCC	4	18	324	minus	0.0203548	0.0161463	0.0203548	chr1_108113109_108113126	chr1_108113109_108113126	1.42961	0.509744	0.385535	1.55007	0.213126	NA	0.661385	-0.175552	0.527217	0.234967	0.106654	-0.0260986
chr1_108113069_108113144	chr1_108113109_108113127	GATTTACACCCTCTCCCCC	4	19	531	minus	0.0224993	0.0224993	0.0224993	chr1_108113109_108113127	chr1_108113109_108113127	2.66163	-0.108033	0.368742	0.087609	0.767239	NA	0.930473	-0.0310977	0.156761	-0.494952	0.448984	-0.0117074
chr1_108113069_108113144	chr1_108113109_108113128	GATTTACACCCTCTCCCCCG	2	20	392	minus	0.0101981	0.00953741	0.0101981	chr1_108113109_108113128	chr1_108113109_108113128	1.86513	-0.387581	0.412957	0.937459	0.332932	NA	0.508241	-0.256426	0.776456	-0.118682	0.0456457	0.0428518
chr1_108113319_108113491	chr1_108113458_108113476	GTTCACATGGAACCCTTCT	3	19	5387	minus	0.222863	0.26486	0.222863	chr1_108113458_108113476	chr1_108113458_108113476	22.7945	1.80823	0.385006	18.0445	2.15802e-05	0.00390497	0.000231042	1.42392	0.000203894	-1.35402	0.46727	0.0139422
chr1_108113319_108113491	chr1_108113458_108113477	GTTCACATGGAACCCTTCTC	3	20	12984	minus	0.266682	0.275004	0.266682	chr1_108113458_108113477	chr1_108113458_108113477	53.9162	1.47956	0.310007	17.0176	3.70346e-05	0.00481714	0.000425727	1.1543	1.06189e-05	-1.28882	0.629296	0.00679846
chr1_108113319_108113491	chr1_108113458_108113478	GTTCACATGGAACCCTTCTCC	3	21	30122	minus	0.293665	0.322598	0.293665	chr1_108113458_108113478	chr1_108113458_108113478	123.893	2.01181	0.326693	28.6349	8.73937e-08	0.000398807	4.65342e-05	1.37294	3.08678e-07	-1.63227	0.577741	-0.008927
chr1_108113319_108113491	chr1_108113458_108113479	GTTCACATGGAACCCTTCTCCA	3	22	6714	minus	0.269083	0.232396	0.269083	chr1_108113458_108113479	chr1_108113458_108113479	28.7669	1.24884	0.34663	11.1067	0.000860166	0.0334343	0.00116985	1.16283	0.001115	-1.07802	0.985061	0.000266614
chr1_108113319_108113491	chr1_108113458_108113480	GTTCACATGGAACCCTTCTCCAC	3	23	30194	minus	0.274218	0.338241	0.274218	chr1_108113458_108113480	chr1_108113458_108113480	118.928	2.33345	0.406134	22.8532	1.74859e-06	0.00156971	2.94527e-05	1.85137	2.86842e-09	-2.43817	0.974573	-0.00056746
chr1_108113319_108113491	chr1_108113459_108113476	TTCACATGGAACCCTTCT	3	18	6897	minus	0.307896	0.3034	0.306269	chr1_108113459_108113476	chr1_108113459_108113476	29.0477	1.5561	0.39582	12.5675	0.000392509	0.0209491	0.0134035	1.0277	0.000512955	-1.34687	0.683899	0.00774698
chr1_108113319_108113491	chr1_108113459_108113477	TTCACATGGAACCCTTCTC	3	19	13379	minus	0.334765	0.314269	0.334338	chr1_108113459_108113477	chr1_108113459_108113477	56.1249	1.2978	0.353232	10.493	0.00119826	0.0394906	0.000385752	1.29969	0.000812187	-1.11885	0.504402	0.0106505
chr1_108113319_108113491	chr1_108113459_108113478	TTCACATGGAACCCTTCTCC	3	20	4967	minus	0.285285	0.287923	0.285285	chr1_108113459_108113478	chr1_108113459_108113478	20.547	1.88943	0.403394	16.7687	4.22232e-05	0.00523109	0.0013245	1.32344	0.000154984	-1.4502	0.833651	-0.0041896
chr1_108113319_108113491	chr1_108113460_108113477	TCACATGGAACCCTTCTC	3	18	5696	minus	0.280542	0.280542	0.240418	chr1_108113460_108113477	chr1_108113460_108113477	24.5719	0.964368	0.307787	9.15586	0.00247924	0.0605522	0.575757	0.1671	5.27023e-06	-1.31064	0.611477	0.00706556
chr1_108113319_108113491	chr1_108113460_108113478	TCACATGGAACCCTTCTCC	3	19	4564	minus	0.268494	0.283909	0.254447	chr1_108113460_108113478	chr1_108113460_108113478	19.7597	1.67328	0.386051	14.9404	0.000110959	0.0100933	0.158628	0.537696	0.0013761	-1.20768	0.299443	-0.0204513
chr1_108113319_108113491	chr1_108113463_108113480	CATGGAACCCTTCTCCAC	3	18	4767	minus	NA	NA	1	chr1_108113463_108113480	chr1_108113463_108113480	19.8304	1.33188	0.358123	10.5956	0.00113355	0.0383167	0.000388175	1.33829	0.00718945	-0.926643	0.827953	-0.00383874
chr1_108113319_108113491	chr1_108113465_108113485	TGGAACCCTTCTCCACTTCGG	4	21	4224	minus	0.00346349	0.000102181	0.00346349	chr1_108113465_108113485	chr1_108113465_108113485	20.842	-0.270275	0.133049	4.07343	0.0435626	0.270922	0.198344	0.161245	0.606774	-0.0653304	0.0937874	0.0102605
chr1_108113319_108113491	chr1_108113466_108113485	GGAACCCTTCTCCACTTCGG	4	20	5221	minus	0.00346349	0.00191714	0.00346349	chr1_108113466_108113485	chr1_108113466_108113485	25.7293	-0.0345234	0.127948	0.0714542	0.789231	0.930337	0.804411	0.0303755	0.523793	-0.0776564	0.176515	0.00776577
chr1_108113319_108113491	chr1_108113466_108113488	GGAACCCTTCTCCACTTCGGCCT	4	23	3456	minus	0.0786523	0.0786523	0.0786523	chr1_108113466_108113488	chr1_108113466_108113488	16.5211	0.616836	0.170578	12.6333	0.00037894	0.0206907	0.988051	-0.00241553	0.0333251	-0.340826	0.558429	-0.00433938
chr1_108113319_108113491	chr1_108113468_108113489	AACCCTTCTCCACTTCGGCCTT	4	22	5230	minus	1	1	1	chr1_108113468_108113489	chr1_108113468_108113489	26.3011	-0.108133	0.15598	0.448069	0.503253	0.797677	0.0594117	0.280086	0.47949	-0.105129	0.470948	0.00488423
chr1_108113564_108113634	chr1_108113575_108113590	CTCACCGCAGCGGCCC	2	16	607	minus	0.170661	0.103704	0.170661	chr1_108113575_108113590	chr1_108113575_108113590	2.77875	-0.450942	0.296717	2.29169	0.130069	NA	0.556427	-0.176673	0.0521142	-0.562143	0.131154	0.0196595
chr1_108113564_108113634	chr1_108113575_108113591	CTCACCGCAGCGGCCCT	1	17	1719	minus	0.160081	0.0632108	0.160081	chr1_108113575_108113591	chr1_108113575_108113591	7.82539	0.149475	0.20755	0.528573	0.467208	0.78039	0.0959943	-0.339803	0.261452	-0.228774	0.311376	0.0091523
chr1_108113564_108113634	chr1_108113575_108113592	CTCACCGCAGCGGCCCTC	1	18	2067	minus	0.101976	0.0522278	0.101976	chr1_108113575_108113592	chr1_108113575_108113592	9.59845	-0.528836	0.267031	3.57053	0.0588137	0.314977	0.0497494	-0.541209	0.0131439	-0.666532	0.00563566	0.0308064
chr1_108113564_108113634	chr1_108113575_108113593	CTCACCGCAGCGGCCCTCC	1	19	937	minus	0.0308056	0.0167958	0.0308056	chr1_108113575_108113593	chr1_108113575_108113593	4.45204	-0.769069	0.358737	4.01171	0.0451853	0.274988	0.125192	-0.581422	0.258616	-0.406103	0.000367214	0.0547892
chr1_108113564_108113634	chr1_108113575_108113594	CTCACCGCAGCGGCCCTCCT	1	20	2726	minus	0.0170817	0.0182455	0.0170817	chr1_108113575_108113594	chr1_108113575_108113594	13.0915	0.13411	0.185525	0.482507	0.487289	0.789746	0.452068	0.134706	0.69701	-0.0690573	0.423545	0.00665543
chr1_108113564_108113634	chr1_108113575_108113595	CTCACCGCAGCGGCCCTCCTA	1	21	2779	minus	0.0189608	0.0271327	0.0189608	chr1_108113575_108113595	chr1_108113575_108113595	13.6176	0.111762	0.191826	0.339834	0.559925	0.828992	0.158914	0.258413	0.553836	0.108493	0.335248	0.00808219
chr1_108113564_108113634	chr1_108113575_108113596	CTCACCGCAGCGGCCCTCCTAC	1	22	2449	minus	0.0301267	0.0209789	0.0301267	chr1_108113575_108113596	chr1_108113575_108113596	11.4033	0.296418	0.168124	2.93188	0.0868465	0.378971	0.318069	0.161281	0.121202	-0.248227	0.575114	0.00422397
chr1_108113564_108113634	chr1_108113575_108113597	CTCACCGCAGCGGCCCTCCTACT	1	23	3766	minus	0.0669821	0.0623777	0.0669821	chr1_108113575_108113597	chr1_108113575_108113597	18.8194	0.234804	0.163846	1.91789	0.166089	0.516283	0.0174343	0.376642	0.585384	-0.0847076	0.14427	0.010485
chr1_108113564_108113634	chr1_108113576_108113592	TCACCGCAGCGGCCCTC	1	17	1156	minus	0.0939256	0.0542167	0.0939256	chr1_108113576_108113592	chr1_108113576_108113592	5.50033	-1.16589	0.365636	8.95067	0.00277368	0.0649645	0.150883	-0.580594	0.0444942	-0.82324	0.00418735	0.0415038
chr1_108113564_108113634	chr1_108113576_108113593	TCACCGCAGCGGCCCTCC	1	18	844	minus	0.0358834	0.0255937	0.0358834	chr1_108113576_108113593	chr1_108113576_108113593	3.94717	-0.948655	0.533769	2.28516	0.130617	NA	0.0524294	-1.13628	0.0674231	-1.06307	0.00088589	0.0744389
chr1_108113564_108113634	chr1_108113576_108113594	TCACCGCAGCGGCCCTCCT	1	19	1621	minus	0.0254047	0.0199639	0.0254047	chr1_108113576_108113594	chr1_108113576_108113594	7.41054	0.178673	0.185416	0.936047	0.333297	0.692765	0.309801	-0.17851	0.234079	0.213438	0.166156	0.0117945
chr1_108113564_108113634	chr1_108113576_108113595	TCACCGCAGCGGCCCTCCTA	1	20	1873	minus	0.0335959	0.0312187	0.0335959	chr1_108113576_108113595	chr1_108113576_108113595	8.60993	0.0522159	0.220044	0.0540193	0.816211	0.940566	0.887406	0.0299103	0.181866	-0.277637	0.805598	0.00238818
chr1_108113564_108113634	chr1_108113576_108113596	TCACCGCAGCGGCCCTCCTAC	1	21	2526	minus	0.0307749	0.0258825	0.0307749	chr1_108113576_108113596	chr1_108113576_108113596	11.9735	0.13428	0.172401	0.606913	0.435953	0.765864	0.830984	0.0348492	0.618058	-0.0816436	0.631922	0.00364376
chr1_108113564_108113634	chr1_108113576_108113597	TCACCGCAGCGGCCCTCCTACT	1	22	2906	minus	0.0235851	0.0223381	0.0235851	chr1_108113576_108113597	chr1_108113576_108113597	14.1974	0.110769	0.167752	0.423543	0.515174	0.806226	0.757104	0.0495146	0.817333	-0.0368914	0.274852	0.00846368
chr1_108113564_108113634	chr1_108113577_108113594	CACCGCAGCGGCCCTCCT	1	18	1805	minus	0.0699319	0.0350032	0.0699319	chr1_108113577_108113594	chr1_108113577_108113594	8.21543	-0.112492	0.190205	0.338935	0.560444	0.829458	0.0888797	-0.319978	0.351119	0.171652	0.37914	0.00761685
chr1_108113564_108113634	chr1_108113577_108113595	CACCGCAGCGGCCCTCCTA	1	19	1775	minus	0.040234	0.0328119	0.040234	chr1_108113577_108113595	chr1_108113577_108113595	8.3035	0.370524	0.193115	3.59701	0.0578837	0.311214	0.0701867	0.333488	0.82845	-0.0396052	0.414218	-0.00713273
chr1_108113564_108113634	chr1_108113577_108113597	CACCGCAGCGGCCCTCCTACT	1	21	2287	minus	0.0045884	0.00946963	0.0045884	chr1_108113577_108113597	chr1_108113577_108113597	10.8937	0.0389914	0.182467	0.0460395	0.830104	0.946993	0.124414	0.268767	0.273666	0.191242	0.752503	-0.00243744
chr1_108113564_108113634	chr1_108113578_108113592	ACCGCAGCGGCCCTC	2	15	955	minus	0.316577	0.119825	0.316577	chr1_108113578_108113592	chr1_108113578_108113592	4.27112	-0.0291168	0.23578	0.0147723	0.903262	0.969362	0.0338497	-0.492623	0.943852	-0.0157617	0.64423	0.00514891
chr1_108113564_108113634	chr1_108113578_108113593	ACCGCAGCGGCCCTCC	2	16	981	minus	0.2059	0.100708	0.2059	chr1_108113578_108113593	chr1_108113578_108113593	4.4479	-0.186949	0.247408	0.568631	0.450804	0.771462	0.209363	-0.301332	0.832384	0.0499859	0.71782	0.00411242
chr1_108113564_108113634	chr1_108113578_108113594	ACCGCAGCGGCCCTCCT	2	17	837	minus	0.0951075	0.0495143	0.0951075	chr1_108113578_108113594	chr1_108113578_108113594	3.56511	-0.0859938	0.260199	0.108852	0.741455	NA	0.997872	0.000648245	0.0755374	0.448322	0.817112	0.00299204
chr1_108113564_108113634	chr1_108113578_108113595	ACCGCAGCGGCCCTCCTA	2	18	1238	minus	0.0456724	0.0327629	0.0456724	chr1_108113578_108113595	chr1_108113578_108113595	5.43719	0.276393	0.213481	1.76327	0.184217	0.540731	0.946001	-0.0137269	0.792057	0.0539026	0.572969	0.00536904
chr1_108113564_108113634	chr1_108113578_108113596	ACCGCAGCGGCCCTCCTAC	2	19	1347	minus	0.0240172	0.0240713	0.0240172	chr1_108113578_108113596	chr1_108113578_108113596	6.05998	-0.0997809	0.201792	0.245147	0.620513	0.854963	0.764676	0.0577437	0.651591	0.0872147	0.560349	-0.0051003
chr1_108113564_108113634	chr1_108113578_108113597	ACCGCAGCGGCCCTCCTACT	2	20	1583	minus	0.00542891	0.0123292	0.00542891	chr1_108113578_108113597	chr1_108113578_108113597	7.45116	-0.0387903	0.218847	0.0313021	0.859568	0.956995	0.210774	0.259929	0.299923	-0.215529	0.929281	0.000851471
chr1_108113564_108113634	chr1_108113579_108113593	CCGCAGCGGCCCTCC	2	15	2081	minus	0.24432	0.094278	0.24432	chr1_108113579_108113593	chr1_108113579_108113593	9.48991	0.611892	0.22146	6.87718	0.00873032	0.118802	0.619721	-0.109824	0.0363105	0.444482	0.723124	-0.00360668
chr1_108113564_108113634	chr1_108113579_108113595	CCGCAGCGGCCCTCCTA	2	17	749	minus	0.0546594	0.0541816	0.0546594	chr1_108113579_108113595	chr1_108113579_108113595	3.32703	0.70722	0.270273	6.90831	0.00857961	NA	0.466733	-0.187207	0.817535	0.0592279	0.53356	-0.00737199
chr1_108113564_108113634	chr1_108113579_108113596	CCGCAGCGGCCCTCCTAC	2	18	556	minus	0.0103386	0.0114346	0.0103386	chr1_108113579_108113596	chr1_108113579_108113596	2.67304	0.226613	0.286302	0.615253	0.432817	NA	0.656235	-0.125682	0.773293	0.0792648	0.372817	-0.0111948
chr1_108113564_108113634	chr1_108113579_108113597	CCGCAGCGGCCCTCCTACT	2	19	614	minus	0.0171086	0.0162011	0.0171086	chr1_108113579_108113597	chr1_108113579_108113597	2.85969	0.00126987	0.295358	2.05896e-05	0.99638	NA	0.878087	0.0428466	0.900267	-0.0358311	0.437108	0.00992706
chr1_108113564_108113634	chr1_108113580_108113597	CGCAGCGGCCCTCCTACT	2	18	740	minus	0.0226921	0.0292991	0.0226921	chr1_108113580_108113597	chr1_108113580_108113597	3.24369	0.170364	0.265738	0.415386	0.519248	NA	0.779575	-0.0707991	0.87482	0.0397239	0.546033	0.00728972
chr1_108113564_108113634	chr1_108113581_108113597	GCAGCGGCCCTCCTACT	2	17	516	minus	0.0520781	0.0520781	0.0520781	chr1_108113581_108113597	chr1_108113581_108113597	2.46097	-0.0470426	0.30027	0.0243125	0.876092	NA	0.269326	-0.321517	0.449823	0.216523	0.472353	-0.0101225
chr1_110141555_110141586	chr1_110141562_110141582	TTCACCACCTTCTCCACCCAG	1	21	23848	plus	0.325837	0.325837	0.325837	hsa-mir-197	chr1_110141562_110141582	120.529	0.0655859	0.116516	0.303908	0.581443	0.840584	0.10506	0.180329	0.382036	-0.0967632	0.322555	-0.00521408
chr1_110141555_110141586	chr1_110141562_110141583	TTCACCACCTTCTCCACCCAGC	1	22	247361	plus	0.306256	0.306256	0.306256	hsa-mir-197	chr1_110141562_110141583	1273.98	-0.12763	0.134153	0.890572	0.345322	0.705223	0.335772	0.121806	0.504277	-0.0853287	0.980139	0.000153686
chr1_110141555_110141586	chr1_110141562_110141584	TTCACCACCTTCTCCACCCAGCA	1	23	3548	plus	0.166397	0.166397	0.166397	hsa-mir-197	chr1_110141562_110141584	18.0574	-0.220317	0.193598	1.28918	0.2562	0.620977	0.619235	-0.090998	0.60177	-0.0957472	0.188325	-0.0117769
chr1_110141555_110141586	chr1_110141563_110141583	TCACCACCTTCTCCACCCAGC	1	21	3507	plus	0.275881	0.275881	0.275881	hsa-mir-197	chr1_110141563_110141583	17.535	0.0337353	0.167338	0.0407896	0.839945	0.95075	0.283225	0.168618	0.796327	0.0413202	0.778334	-0.0021523
chr1_117214406_117214432	chr1_117214408_117214428	GAAAAGCTGGGTTGAGAGGGC	3	21	13076	plus	0.226874	0.22077	0.202731	hsa-mir-320b-1	chr1_117214408_117214428	64.9243	-0.120633	0.103998	1.34021	0.246997	0.61475	0.409651	0.0823129	0.00581949	-0.272156	0.428332	0.00367175
chr1_117214406_117214432	chr1_117214409_117214426	AAAAGCTGGGTTGAGAGG	8	18	89410	plus	0.432416	0.432416	0.432416	hsa-mir-320b-1	chr1_117214409_117214426	421.917	0.252455	0.158842	2.33262	0.126688	0.461104	0.435699	-0.123446	0.315258	0.151939	0.123442	-0.0114974
chr1_117214406_117214432	chr1_117214409_117214427	AAAAGCTGGGTTGAGAGGG	5	19	172671	plus	0.500588	0.500588	0.500588	hsa-mir-320b-1	chr1_117214409_117214427	839.907	0.256123	0.126672	3.91314	0.04791	0.282024	0.429451	-0.097938	0.201439	-0.15276	0.0127445	-0.0146047
chr1_117214406_117214432	chr1_117214409_117214428	AAAAGCTGGGTTGAGAGGGC	3	20	476166	plus	0.435826	0.435826	0.379261	hsa-mir-320b-1	chr1_117214409_117214428	2351.78	0.156587	0.101024	2.36213	0.124312	0.456286	0.432597	-0.075942	0.000265138	-0.347958	0.620622	-0.00228123
chr1_117214406_117214432	chr1_117214409_117214429	AAAAGCTGGGTTGAGAGGGCA	2	21	73230	plus	0.253896	0.253896	0.21631	hsa-mir-320b-1	chr1_117214409_117214429	389.714	-0.0373766	0.149028	0.0610273	0.80488	0.936455	0.155181	0.203096	0.588734	-0.0774317	0.0797908	0.0115329
chr1_117214406_117214432	chr1_117214409_117214430	AAAAGCTGGGTTGAGAGGGCAA	2	22	14356	plus	0.361774	0.361774	0.165122	hsa-mir-320b-1	chr1_117214409_117214430	72.7035	-0.111589	0.109116	1.04872	0.305803	0.669283	0.188465	0.136251	0.0237993	-0.235396	0.20678	0.00617112
chr1_117214406_117214432	chr1_117214410_117214428	AAAGCTGGGTTGAGAGGGC	3	19	27406	plus	0.544559	0.533119	0.544559	hsa-mir-320b-1	chr1_117214410_117214428	132.309	0.188626	0.120994	2.36997	0.123689	0.454548	0.155753	-0.165342	0.057838	-0.217099	0.166268	-0.00770785
chr1_117637247_117637304	chr1_117637277_117637297	TCTTCTCTGTTTTGGCCATGT	1	21	18094	plus	0.140021	0.347782	0.140021	hsa-mir-942	chr1_117637277_117637297	96.6557	-0.0128121	0.146054	0.00739199	0.931485	0.977408	0.233438	0.165999	0.712456	0.0512214	0.946328	-0.00043175
chr1_117637247_117637304	chr1_117637277_117637298	TCTTCTCTGTTTTGGCCATGTG	1	22	4097	plus	0.122242	0.0755428	0.122242	hsa-mir-942	chr1_117637277_117637298	21.4571	-0.0713887	0.15676	0.202047	0.653073	0.871944	0.00752834	0.400263	0.494826	-0.103574	0.0853628	-0.0118345
chr1_117637247_117637304	chr1_117637277_117637299	TCTTCTCTGTTTTGGCCATGTGT	1	23	54948	plus	0.134722	0.211252	0.134722	hsa-mir-942	chr1_117637277_117637299	286.776	-0.261035	0.0826396	9.94523	0.00161267	0.0470484	0.0469549	0.155106	0.202295	0.100901	0.396392	0.00306524
chr1_117637247_117637304	chr1_117637279_117637298	TTCTCTGTTTTGGCCATGTG	1	20	3171	plus	0.338355	0.165926	0.338355	hsa-mir-942	chr1_117637279_117637298	16.8565	0.068039	0.207434	0.102295	0.749093	0.916299	0.0225403	0.457299	0.652209	-0.0900109	0.228918	0.0112925
chr1_117637247_117637304	chr1_117637279_117637299	TTCTCTGTTTTGGCCATGTGT	1	21	80282	plus	0.0386539	0.0923731	0.0386539	hsa-mir-942	chr1_117637279_117637299	424.134	-0.122793	0.121044	1.00302	0.316581	0.679274	0.0596369	0.216412	0.5911	0.061969	0.219584	0.00646452
chr1_117637247_117637304	chr1_117637279_117637300	TTCTCTGTTTTGGCCATGTGTG	1	22	10679	plus	0.0988964	0.0969323	0.0988964	hsa-mir-942	chr1_117637279_117637300	56.4975	-0.163231	0.149821	1.19481	0.274362	0.638859	0.00814675	0.377548	0.320156	-0.142671	0.48204	-0.00440529
chr1_117637247_117637304	chr1_117637279_117637301	TTCTCTGTTTTGGCCATGTGTGT	1	23	42429	plus	0.00774056	0.00774056	0.00774056	hsa-mir-942	chr1_117637279_117637301	216.21	-0.300078	0.0927618	10.5856	0.00113975	0.0384787	0.297896	0.0906961	0.75737	0.0273391	0.723667	0.00144339
chr1_117637313_117637344	chr1_117637317_117637337	CACATGGCCGAAACAGAGAAG	1	21	1821	plus	0.0971032	0.0940097	0.0971032	hsa-mir-942	chr1_117637317_117637337	9.09073	-0.149632	0.232651	0.404068	0.524996	0.813169	0.237176	0.262757	0.834169	0.0468803	0.0920877	0.0166788
chr1_117637313_117637344	chr1_117637317_117637338	CACATGGCCGAAACAGAGAAGT	1	22	17396	plus	0.118219	0.157306	0.118219	hsa-mir-942	chr1_117637317_117637338	90.8619	0.137608	0.135442	1.01049	0.314786	0.678899	0.0651303	0.236385	0.944416	0.00899952	0.213496	0.00779706
chr1_117637313_117637344	chr1_117637317_117637339	CACATGGCCGAAACAGAGAAGTT	1	23	2322	plus	0.137882	0.12056	0.137882	hsa-mir-942	chr1_117637317_117637339	11.7676	-0.247759	0.199241	1.38215	0.239736	0.609433	0.624912	0.0920197	0.929268	-0.0171773	0.212896	0.011309
chr1_117637313_117637344	chr1_117637318_117637338	ACATGGCCGAAACAGAGAAGT	1	21	360	plus	0.0539266	0.0539266	0.0539266	hsa-mir-942	chr1_117637318_117637338	2.02293	-0.166581	0.472104	0.0911785	0.762684	NA	0.264089	-0.506104	0.235866	0.55234	0.994657	-0.000186537
chr1_117637313_117637344	chr1_117637319_117637338	CATGGCCGAAACAGAGAAGT	1	20	741	plus	0.0767805	0.121834	0.0767805	hsa-mir-942	chr1_117637319_117637338	3.83539	0.590165	0.343518	2.89503	0.0888529	NA	0.509954	-0.216674	0.526518	-0.206669	0.486692	-0.010529
chr1_117637313_117637344	chr1_117637319_117637339	CATGGCCGAAACAGAGAAGTT	1	21	3254	plus	0.0775464	0.188312	0.0775464	hsa-mir-942	chr1_117637319_117637339	16.8395	0.0919391	0.219076	0.167472	0.682369	0.887168	0.0204755	0.486243	0.777419	-0.0604826	0.515544	0.00638609
chr1_117637313_117637344	chr1_117637319_117637340	CATGGCCGAAACAGAGAAGTTA	1	22	1275	plus	0.0780013	0.0892524	0.0780013	hsa-mir-942	chr1_117637319_117637340	6.41007	-0.196541	0.255803	0.577909	0.447133	0.769723	0.939372	-0.0182549	0.506898	0.162485	0.146482	0.0162074
chr1_120543977_120544056	chr1_120544000_120544016	GCTACGGACCTCCACCA	2	17	1164	minus	0.173405	0.146062	0.173405	chr1_120544000_120544016	chr1_120544000_120544016	5.17745	0.154149	0.356109	0.151117	0.69747	0.894943	0.450073	0.279989	9.80016e-05	-1.30639	0.100379	-0.0297626
chr1_120543977_120544056	chr1_120544000_120544017	GCTACGGACCTCCACCAG	2	18	2103	minus	0.136016	0.112453	0.135957	chr1_120544000_120544017	chr1_120544000_120544017	8.67226	0.940466	0.407966	4.03521	0.0445603	0.272697	0.284794	0.470041	6.40175e-06	-1.89646	0.380465	-0.0172436
chr1_120543977_120544056	chr1_120544000_120544018	GCTACGGACCTCCACCAGA	2	19	1306	minus	0.108379	0.0663715	0.108207	chr1_120544000_120544018	chr1_120544000_120544018	5.93104	0.439535	0.294783	2.03497	0.153717	0.499173	0.108354	0.462307	0.0588911	-0.523563	0.0513197	-0.0263746
chr1_120543977_120544056	chr1_120544000_120544020	GCTACGGACCTCCACCAGAGT	2	21	1304	minus	0.0310314	0.0319793	0.0310314	chr1_120544000_120544020	chr1_120544000_120544020	5.82403	0.247621	0.299493	0.602471	0.437637	0.765973	0.229915	0.354806	0.0210093	-0.652325	0.434515	-0.0104757
chr1_120543977_120544056	chr1_120544000_120544021	GCTACGGACCTCCACCAGAGTT	2	22	1828	minus	0.0386396	0.0175577	0.0386396	chr1_120544000_120544021	chr1_120544000_120544021	8.46426	0.172878	0.255873	0.463041	0.496206	0.794813	0.649899	0.109647	0.514473	-0.157996	0.915465	0.00127664
chr1_120543977_120544056	chr1_120544000_120544022	GCTACGGACCTCCACCAGAGTTT	2	23	1559	minus	0.0386178	0.0476575	0.0386178	chr1_120544000_120544022	chr1_120544000_120544022	7.22689	0.326022	0.287993	1.22513	0.268356	0.631158	0.164593	0.390758	0.0117013	-0.680025	0.627751	0.00707769
chr1_120543977_120544056	chr1_120544000_120544023	GCTACGGACCTCCACCAGAGTTTC	2	24	2809	minus	0.0375084	0.0252166	0.0240844	chr1_120544000_120544023	chr1_120544000_120544023	13.3452	0.896538	0.220873	14.8513	0.000116327	0.0103737	0.0543622	0.42232	0.306366	0.216968	0.856727	0.00180213
chr1_120543977_120544056	chr1_120544000_120544024	GCTACGGACCTCCACCAGAGTTTCC	2	25	1211	minus	0.00944067	0.02679	0.00752761	chr1_120544000_120544024	chr1_120544000_120544024	5.26179	0.879666	0.35406	4.91477	0.026628	0.209337	0.0121641	0.915291	0.00227711	-1.01125	0.606984	0.00820294
chr1_120543977_120544056	chr1_120544001_120544018	CTACGGACCTCCACCAGA	2	18	1014	minus	0.130622	0.0803137	0.130622	chr1_120544001_120544018	chr1_120544001_120544018	4.6073	0.395401	0.388119	0.817103	0.366029	0.719197	0.219985	0.494627	0.00210693	-1.13039	0.103753	-0.0302021
chr1_120543977_120544056	chr1_120544002_120544023	TACGGACCTCCACCAGAGTTTC	2	22	1020	minus	0.116968	0.0494934	0.0535792	chr1_120544002_120544023	chr1_120544002_120544023	5.10771	0.74779	0.3266	4.35958	0.0368014	0.249876	0.0725248	0.574732	0.885438	-0.0453463	0.584962	-0.00821938
chr1_120543977_120544056	chr1_120544004_120544020	CGGACCTCCACCAGAGT	3	17	1218	minus	0.218696	0.100629	0.159021	chr1_120544004_120544020	chr1_120544004_120544020	5.66397	-1.14846	0.397923	7.04523	0.00794765	0.112342	0.10501	-0.706476	0.0227047	-0.923421	0.000396407	0.0603085
chr1_120543977_120544056	chr1_120544004_120544021	CGGACCTCCACCAGAGTT	2	18	2711	minus	0.172898	0.101961	0.172816	chr1_120544004_120544021	chr1_120544004_120544021	12.8198	-0.6161	0.316215	3.36821	0.0664661	0.340189	0.00936263	-0.901403	0.0308714	-0.689854	0.00200068	0.0423402
chr1_120543977_120544056	chr1_120544004_120544022	CGGACCTCCACCAGAGTTT	2	19	1365	minus	0.0690679	0.0831041	0.0662792	chr1_120544004_120544022	chr1_120544004_120544022	6.3498	0.15228	0.313352	0.218902	0.639878	0.86326	0.993595	0.00271568	0.0269669	-0.65992	0.557272	0.00784851
chr1_120543977_120544056	chr1_120544004_120544023	CGGACCTCCACCAGAGTTTC	2	20	3696	minus	0.0585973	0.0526407	0.0578038	chr1_120544004_120544023	chr1_120544004_120544023	17.6203	0.554479	0.211949	6.26424	0.0123199	0.137903	0.0220372	0.481032	0.665	-0.0874466	0.708843	0.00353705
chr1_120543977_120544056	chr1_120544004_120544025	CGGACCTCCACCAGAGTTTCCT	2	22	1023	minus	0.100851	0.0875813	0.097782	chr1_120544004_120544025	chr1_120544004_120544025	4.5214	-0.259904	0.412097	0.383173	0.53591	0.819622	0.264024	0.451563	0.109332	-0.622646	0.895089	0.00251878
chr1_120543977_120544056	chr1_120544005_120544021	GGACCTCCACCAGAGTT	2	17	1550	minus	0.166797	0.101645	0.165721	chr1_120544005_120544021	chr1_120544005_120544021	7.0319	-0.000430174	0.252988	2.17609e-06	0.998823	0.999435	0.0942081	-0.422188	0.0419177	-0.48477	0.999101	-1.20444e-05
chr1_120543977_120544056	chr1_120544005_120544022	GGACCTCCACCAGAGTTT	2	18	2547	minus	0.12432	0.119958	0.122647	chr1_120544005_120544022	chr1_120544005_120544022	11.0187	0.761523	0.237607	9.40216	0.0021673	0.0562778	0.452338	0.175682	0.0854279	-0.386907	0.096964	-0.0182172
chr1_120543977_120544056	chr1_120544005_120544023	GGACCTCCACCAGAGTTTC	2	19	4122	minus	0.111419	0.0865026	0.111419	chr1_120544005_120544023	chr1_120544005_120544023	18.6199	0.512967	0.226335	4.33762	0.037279	0.251966	0.0163518	0.547462	0.0902972	-0.361464	0.761207	-0.00322306
chr1_120543977_120544056	chr1_120544005_120544024	GGACCTCCACCAGAGTTTCC	2	20	1146	minus	0.0818981	0.0780519	0.0818981	chr1_120544005_120544024	chr1_120544005_120544024	5.0384	0.986695	0.418557	5.01792	0.0250863	0.202376	0.00331292	1.22057	0.0660412	-0.720867	0.190398	-0.0267209
chr1_120543977_120544056	chr1_120544005_120544025	GGACCTCCACCAGAGTTTCCT	2	21	3753	minus	0.125862	0.102949	0.125862	chr1_120544005_120544025	chr1_120544005_120544025	16.6678	0.112003	0.307229	0.113974	0.735664	0.909511	0.00519872	0.878246	4.45594e-05	-1.17942	0.366094	-0.0126782
chr1_120543977_120544056	chr1_120544005_120544026	GGACCTCCACCAGAGTTTCCTC	2	22	1180	minus	0.0901544	0.0834901	0.0901544	chr1_120544005_120544026	chr1_120544005_120544026	5.52008	0.218425	0.373624	0.286689	0.59235	0.846008	0.19066	0.530545	0.142372	-0.525419	0.414434	0.0147665
chr1_120543977_120544056	chr1_120544006_120544023	GACCTCCACCAGAGTTTC	2	18	1874	minus	0.1469	0.112801	0.141882	chr1_120544006_120544023	chr1_120544006_120544023	7.98793	0.667824	0.316966	3.84417	0.0499193	0.287847	0.0505824	0.62267	0.0116036	-0.772575	0.724204	0.00515147
chr1_120543977_120544056	chr1_120544006_120544024	GACCTCCACCAGAGTTTCC	2	19	10312	minus	0.158847	0.117146	0.142303	chr1_120544006_120544024	chr1_120544006_120544024	42.7586	1.34299	0.30422	15.9081	6.6493e-05	0.00709392	2.3533e-05	1.30829	0.000804548	-0.966405	0.639946	-0.00615496
chr1_120543977_120544056	chr1_120544006_120544025	GACCTCCACCAGAGTTTCCT	2	20	3742	minus	0.129724	0.106604	0.129724	chr1_120544006_120544025	chr1_120544006_120544025	15.9366	0.947922	0.294223	8.71927	0.00314864	0.0687478	0.000784439	1.01454	1.16683e-05	-1.21904	0.873014	-0.00225621
chr1_120543977_120544056	chr1_120544006_120544026	GACCTCCACCAGAGTTTCCTC	2	21	1448	minus	0.0821392	0.0886968	0.0821392	chr1_120544006_120544026	chr1_120544006_120544026	6.55929	0.675928	0.317066	4.164	0.0412918	0.265552	0.155343	0.456478	0.0139088	-0.736549	0.228955	-0.017861
chr1_120543977_120544056	chr1_120544007_120544024	ACCTCCACCAGAGTTTCC	2	18	1817	minus	0.150246	0.103494	0.12317	chr1_120544007_120544024	chr1_120544007_120544024	7.69075	0.799329	0.341194	3.98041	0.0460324	0.277859	0.0159656	0.88467	0.00260136	-1.00874	0.609819	0.00854498
chr1_120543977_120544056	chr1_120544007_120544025	ACCTCCACCAGAGTTTCCT	2	19	3413	minus	0.120958	0.0939665	0.111725	chr1_120544007_120544025	chr1_120544007_120544025	14.9531	0.789717	0.237482	9.26008	0.00234203	0.0586685	0.0859332	0.421347	8.43617e-05	-0.883009	0.841789	-0.00211942
chr1_120543977_120544056	chr1_120544007_120544026	ACCTCCACCAGAGTTTCCTC	2	20	2012	minus	0.0811586	0.0690395	0.0760534	chr1_120544007_120544026	chr1_120544007_120544026	9.23656	0.0985029	0.27475	0.117692	0.731552	0.907334	0.647175	0.122274	0.0567163	-0.493244	0.522452	0.00898276
chr1_120543977_120544056	chr1_120544007_120544027	ACCTCCACCAGAGTTTCCTCT	2	21	2584	minus	0.059802	0.0651356	0.059802	chr1_120544007_120544027	chr1_120544007_120544027	11.8769	0.397177	0.236283	2.70579	0.0999844	0.408117	0.00756211	0.615412	0.00187699	-0.687702	0.00785335	-0.0288411
chr1_120543977_120544056	chr1_120544007_120544028	ACCTCCACCAGAGTTTCCTCTG	2	22	1290	minus	0.0292276	0.0319473	0.0292276	chr1_120544007_120544028	chr1_120544007_120544028	6.06356	0.163811	0.276461	0.360055	0.548476	0.824717	0.559784	0.15515	0.00757713	-0.697003	0.457122	-0.0095048
chr1_120543977_120544056	chr1_120544008_120544026	CCTCCACCAGAGTTTCCTC	2	19	2691	minus	0.0839603	0.0789393	0.0817984	chr1_120544008_120544026	chr1_120544008_120544026	12.4542	0.0153981	0.226584	0.0044755	0.946662	0.980782	0.00404955	-0.633076	0.462557	-0.157795	0.864586	0.00178722
chr1_120543977_120544056	chr1_120544008_120544027	CCTCCACCAGAGTTTCCTCT	2	20	3630	minus	0.0822567	0.0710301	0.0773439	chr1_120544008_120544027	chr1_120544008_120544027	17.4874	0.10243	0.233167	0.189116	0.663654	0.876907	0.000894761	-0.739559	0.549228	-0.133664	0.376518	-0.00968773
chr1_120543977_120544056	chr1_120544008_120544028	CCTCCACCAGAGTTTCCTCTG	2	21	1825	minus	0.078898	0.0769322	0.0779976	chr1_120544008_120544028	chr1_120544008_120544028	8.87447	-0.259149	0.262763	0.923859	0.336464	0.696177	0.552216	-0.150559	0.990698	-0.00292317	0.569857	-0.00683265
chr1_145277317_145277401	chr1_145277347_145277367	CAGAGGAAACTCTGGTGGAGG	2	21	1825	plus	0.0779976	0.0647232	0.0779976	chr1_145277347_145277367	chr1_145277347_145277367	8.87447	-0.259149	0.262763	0.923859	0.336464	0.696177	0.552216	-0.150559	0.990698	-0.00292317	0.569857	-0.00683265
chr1_145277317_145277401	chr1_145277347_145277368	CAGAGGAAACTCTGGTGGAGGT	2	22	1290	plus	0.029245	0.0423204	0.0292276	chr1_145277347_145277368	chr1_145277347_145277368	6.06356	0.163811	0.276461	0.360055	0.548476	0.824717	0.559784	0.15515	0.00757713	-0.697003	0.457122	-0.0095048
chr1_145277317_145277401	chr1_145277348_145277367	AGAGGAAACTCTGGTGGAGG	2	20	3630	plus	0.0773439	0.0503952	0.0773439	chr1_145277348_145277367	chr1_145277348_145277367	17.4874	0.10243	0.233167	0.189116	0.663654	0.876907	0.000894761	-0.739559	0.549228	-0.133664	0.376518	-0.00968773
chr1_145277317_145277401	chr1_145277348_145277368	AGAGGAAACTCTGGTGGAGGT	2	21	2584	plus	0.061187	0.058438	0.059802	chr1_145277348_145277368	chr1_145277348_145277368	11.8769	0.397177	0.236283	2.70579	0.0999844	0.408117	0.00756211	0.615412	0.00187699	-0.687702	0.00785335	-0.0288411
chr1_145277317_145277401	chr1_145277349_145277367	GAGGAAACTCTGGTGGAGG	2	19	2691	plus	0.0817984	0.0652197	0.0817984	chr1_145277349_145277367	chr1_145277349_145277367	12.4542	0.0153981	0.226584	0.0044755	0.946662	0.980782	0.00404955	-0.633076	0.462557	-0.157795	0.864586	0.00178722
chr1_145277317_145277401	chr1_145277349_145277368	GAGGAAACTCTGGTGGAGGT	2	20	2012	plus	0.0760534	0.0639229	0.0760534	chr1_145277349_145277368	chr1_145277349_145277368	9.23656	0.0985029	0.27475	0.117692	0.731552	0.907334	0.647175	0.122274	0.0567163	-0.493244	0.522452	0.00898276
chr1_145277317_145277401	chr1_145277349_145277369	GAGGAAACTCTGGTGGAGGTC	2	21	1448	plus	0.0900937	0.0833508	0.0821392	chr1_145277349_145277369	chr1_145277349_145277369	6.55929	0.675928	0.317066	4.164	0.0412918	0.265552	0.155343	0.456478	0.0139088	-0.736549	0.228955	-0.017861
chr1_145277317_145277401	chr1_145277349_145277370	GAGGAAACTCTGGTGGAGGTCC	2	22	1180	plus	0.111299	0.0799265	0.0901544	chr1_145277349_145277370	chr1_145277349_145277370	5.52008	0.218425	0.373624	0.286689	0.59235	0.846008	0.19066	0.530545	0.142372	-0.525419	0.414434	0.0147665
chr1_145277317_145277401	chr1_145277350_145277368	AGGAAACTCTGGTGGAGGT	2	19	3413	plus	0.111725	0.0962099	0.111725	chr1_145277350_145277368	chr1_145277350_145277368	14.9531	0.789717	0.237482	9.26008	0.00234203	0.0586685	0.0859332	0.421347	8.43617e-05	-0.883009	0.841789	-0.00211942
chr1_145277317_145277401	chr1_145277350_145277369	AGGAAACTCTGGTGGAGGTC	2	20	3742	plus	0.135027	0.110002	0.129724	chr1_145277350_145277369	chr1_145277350_145277369	15.9366	0.947922	0.294223	8.71927	0.00314864	0.0687478	0.000784439	1.01454	1.16683e-05	-1.21904	0.873014	-0.00225621
chr1_145277317_145277401	chr1_145277350_145277370	AGGAAACTCTGGTGGAGGTCC	2	21	3753	plus	0.145338	0.107194	0.125862	chr1_145277350_145277370	chr1_145277350_145277370	16.6678	0.112003	0.307229	0.113974	0.735664	0.909511	0.00519872	0.878246	4.45594e-05	-1.17942	0.366094	-0.0126782
chr1_145277317_145277401	chr1_145277350_145277371	AGGAAACTCTGGTGGAGGTCCG	2	22	1023	plus	0.097782	0.0725386	0.097782	chr1_145277350_145277371	chr1_145277350_145277371	4.5214	-0.259904	0.412097	0.383173	0.53591	0.819622	0.264024	0.451563	0.109332	-0.622646	0.895089	0.00251878
chr1_145277317_145277401	chr1_145277351_145277368	GGAAACTCTGGTGGAGGT	2	18	1817	plus	0.12317	0.109234	0.12317	chr1_145277351_145277368	chr1_145277351_145277368	7.69075	0.799329	0.341194	3.98041	0.0460324	0.277859	0.0159656	0.88467	0.00260136	-1.00874	0.609819	0.00854498
chr1_145277317_145277401	chr1_145277351_145277369	GGAAACTCTGGTGGAGGTC	2	19	10312	plus	0.142303	0.132452	0.142303	chr1_145277351_145277369	chr1_145277351_145277369	42.7586	1.34299	0.30422	15.9081	6.6493e-05	0.00709392	2.3533e-05	1.30829	0.000804548	-0.966405	0.639946	-0.00615496
chr1_145277317_145277401	chr1_145277351_145277370	GGAAACTCTGGTGGAGGTCC	2	20	1146	plus	0.0830721	0.075942	0.0818981	chr1_145277351_145277370	chr1_145277351_145277370	5.0384	0.986695	0.418557	5.01792	0.0250863	0.202376	0.00331292	1.22057	0.0660412	-0.720867	0.190398	-0.0267209
chr1_145277317_145277401	chr1_145277351_145277375	GGAAACTCTGGTGGAGGTCCGTAGC	2	25	1211	plus	0.00752761	0.0221721	0.00752761	chr1_145277351_145277375	chr1_145277351_145277375	5.26179	0.879666	0.35406	4.91477	0.026628	0.209337	0.0121641	0.915291	0.00227711	-1.01125	0.606984	0.00820294
chr1_145277317_145277401	chr1_145277352_145277369	GAAACTCTGGTGGAGGTC	2	18	1874	plus	0.141882	0.128538	0.141882	chr1_145277352_145277369	chr1_145277352_145277369	7.98793	0.667824	0.316966	3.84417	0.0499193	0.287847	0.0505824	0.62267	0.0116036	-0.772575	0.724204	0.00515147
chr1_145277317_145277401	chr1_145277352_145277370	GAAACTCTGGTGGAGGTCC	2	19	4122	plus	0.113661	0.0891963	0.111419	chr1_145277352_145277370	chr1_145277352_145277370	18.6199	0.512967	0.226335	4.33762	0.037279	0.251966	0.0163518	0.547462	0.0902972	-0.361464	0.761207	-0.00322306
chr1_145277317_145277401	chr1_145277352_145277371	GAAACTCTGGTGGAGGTCCG	2	20	3696	plus	0.0578038	0.0514686	0.0578038	chr1_145277352_145277371	chr1_145277352_145277371	17.6203	0.554479	0.211949	6.26424	0.0123199	0.137903	0.0220372	0.481032	0.665	-0.0874466	0.708843	0.00353705
chr1_145277317_145277401	chr1_145277352_145277373	GAAACTCTGGTGGAGGTCCGTA	2	22	1020	plus	0.0535792	0.0373097	0.0535792	chr1_145277352_145277373	chr1_145277352_145277373	5.10771	0.74779	0.3266	4.35958	0.0368014	0.249876	0.0725248	0.574732	0.885438	-0.0453463	0.584962	-0.00821938
chr1_145277317_145277401	chr1_145277352_145277375	GAAACTCTGGTGGAGGTCCGTAGC	2	24	2809	plus	0.0240844	0.0192394	0.0240844	chr1_145277352_145277375	chr1_145277352_145277375	13.3452	0.896538	0.220873	14.8513	0.000116327	0.0103737	0.0543622	0.42232	0.306366	0.216968	0.856727	0.00180213
chr1_145277317_145277401	chr1_145277353_145277370	AAACTCTGGTGGAGGTCC	2	18	2547	plus	0.122647	0.143981	0.122647	chr1_145277353_145277370	chr1_145277353_145277370	11.0187	0.761523	0.237607	9.40216	0.0021673	0.0562778	0.452338	0.175682	0.0854279	-0.386907	0.096964	-0.0182172
chr1_145277317_145277401	chr1_145277353_145277371	AAACTCTGGTGGAGGTCCG	2	19	1365	plus	0.0662792	0.069004	0.0662792	chr1_145277353_145277371	chr1_145277353_145277371	6.3498	0.15228	0.313352	0.218902	0.639878	0.86326	0.993595	0.00271568	0.0269669	-0.65992	0.557272	0.00784851
chr1_145277317_145277401	chr1_145277353_145277375	AAACTCTGGTGGAGGTCCGTAGC	2	23	1559	plus	0.0442826	0.0526877	0.0386178	chr1_145277353_145277375	chr1_145277353_145277375	7.22689	0.326022	0.287993	1.22513	0.268356	0.631158	0.164593	0.390758	0.0117013	-0.680025	0.627751	0.00707769
chr1_145277317_145277401	chr1_145277354_145277370	AACTCTGGTGGAGGTCC	2	17	1550	plus	0.165721	0.0972835	0.165721	chr1_145277354_145277370	chr1_145277354_145277370	7.0319	-0.000430174	0.252988	2.17609e-06	0.998823	0.999435	0.0942081	-0.422188	0.0419177	-0.48477	0.999101	-1.20444e-05
chr1_145277317_145277401	chr1_145277354_145277371	AACTCTGGTGGAGGTCCG	2	18	2711	plus	0.172816	0.0905063	0.172816	chr1_145277354_145277371	chr1_145277354_145277371	12.8198	-0.6161	0.316215	3.36821	0.0664661	0.340189	0.00936263	-0.901403	0.0308714	-0.689854	0.00200068	0.0423402
chr1_145277317_145277401	chr1_145277354_145277375	AACTCTGGTGGAGGTCCGTAGC	2	22	1828	plus	0.0386396	0.02217	0.0386396	chr1_145277354_145277375	chr1_145277354_145277375	8.46426	0.172878	0.255873	0.463041	0.496206	0.794813	0.649899	0.109647	0.514473	-0.157996	0.915465	0.00127664
chr1_145277317_145277401	chr1_145277355_145277371	ACTCTGGTGGAGGTCCG	3	17	1218	plus	0.220072	0.170164	0.159021	chr1_145277355_145277371	chr1_145277355_145277371	5.66397	-1.14846	0.397923	7.04523	0.00794765	0.112342	0.10501	-0.706476	0.0227047	-0.923421	0.000396407	0.0603085
chr1_145277317_145277401	chr1_145277355_145277375	ACTCTGGTGGAGGTCCGTAGC	2	21	1304	plus	0.0310314	0.0400974	0.0310314	chr1_145277355_145277375	chr1_145277355_145277375	5.82403	0.247621	0.299493	0.602471	0.437637	0.765973	0.229915	0.354806	0.0210093	-0.652325	0.434515	-0.0104757
chr1_145277317_145277401	chr1_145277357_145277374	TCTGGTGGAGGTCCGTAG	2	18	1014	plus	0.130622	0.111529	0.130622	chr1_145277357_145277374	chr1_145277357_145277374	4.6073	0.395401	0.388119	0.817103	0.366029	0.719197	0.219985	0.494627	0.00210693	-1.13039	0.103753	-0.0302021
chr1_145277317_145277401	chr1_145277357_145277375	TCTGGTGGAGGTCCGTAGC	2	19	1306	plus	0.108207	0.0784464	0.108207	chr1_145277357_145277375	chr1_145277357_145277375	5.93104	0.439535	0.294783	2.03497	0.153717	0.499173	0.108354	0.462307	0.0588911	-0.523563	0.0513197	-0.0263746
chr1_145277317_145277401	chr1_145277358_145277375	CTGGTGGAGGTCCGTAGC	2	18	2103	plus	0.135957	0.135957	0.135957	chr1_145277358_145277375	chr1_145277358_145277375	8.67226	0.940466	0.407966	4.03521	0.0445603	0.272697	0.284794	0.470041	6.40175e-06	-1.89646	0.380465	-0.0172436
chr1_145277317_145277401	chr1_145277359_145277375	TGGTGGAGGTCCGTAGC	2	17	1164	plus	0.173405	0.145809	0.173405	chr1_145277359_145277375	chr1_145277359_145277375	5.17745	0.154149	0.356109	0.151117	0.69747	0.894943	0.450073	0.279989	9.80016e-05	-1.30639	0.100379	-0.0297626
chr1_145395511_145395615	chr1_145395553_145395575	GAGATTAAGAGTCTCATGCTCTA	9	23	23846	minus	1	1	1	chr1_145395553_145395575	chr1_145395553_145395575	122.286	-0.083216	0.156589	0.2843	0.593897	0.84712	0.166271	0.204827	0.072508	0.271419	0.89277	-0.000981777
chr1_145395511_145395615	chr1_145395562_145395594	AGTCTCATGCTCTACCGACTGAGCTAGCCGGGC	5	33	108727	minus	0.804752	0.804752	0.804752	chr1_145395562_145395594	chr1_145395562_145395594	487.699	0.630933	0.172895	12.0473	0.00051867	0.0245371	0.825871	-0.0354635	5.78237e-05	-0.65563	0.947628	-0.000520263
chr1_145395511_145395615	chr1_145395563_145395594	GTCTCATGCTCTACCGACTGAGCTAGCCGGGC	6	32	95145	minus	0.882445	0.819146	0.86164	chr1_145395563_145395594	chr1_145395563_145395594	444.262	0.436399	0.180815	5.56548	0.018318	0.171205	0.0999154	0.276651	0.00527901	-0.474974	0.655445	0.00362599
chr1_145395511_145395615	chr1_145395564_145395594	TCTCATGCTCTACCGACTGAGCTAGCCGGGC	6	31	44583	minus	0.919367	0.826443	0.854742	chr1_145395564_145395594	chr1_145395564_145395594	216.165	0.344786	0.191014	3.17941	0.0745717	0.355369	0.0189444	0.417768	0.0374948	-0.374383	0.782881	0.00237887
chr1_145395511_145395615	chr1_145395565_145395592	CTCATGCTCTACCGACTGAGCTAGCCGG	6	28	21622	minus	0.809666	0.261701	0.809666	chr1_145395565_145395592	chr1_145395565_145395592	111.368	0.859338	0.259936	10.5482	0.00116302	0.038918	0.164688	0.337322	0.00902534	-0.640191	0.884644	0.00173949
chr1_145395511_145395615	chr1_145395565_145395594	CTCATGCTCTACCGACTGAGCTAGCCGGGC	6	30	96993	minus	0.884853	0.63596	0.884853	chr1_145395565_145395594	chr1_145395565_145395594	462.744	0.51346	0.210966	5.64812	0.0174741	0.166435	0.152188	0.280682	0.0110545	-0.503977	0.962868	0.00044407
chr1_145395511_145395615	chr1_145395567_145395592	CATGCTCTACCGACTGAGCTAGCCGG	9	26	29813	minus	0.427154	0.264802	0.427154	chr1_145395567_145395592	chr1_145395567_145395592	157.352	0.820686	0.257365	9.88658	0.00166489	0.0477199	0.2985	0.251037	0.00124009	-0.787256	0.8216	0.00267789
chr1_145395511_145395615	chr1_145395567_145395594	CATGCTCTACCGACTGAGCTAGCCGGGC	9	28	77218	minus	0.758624	0.482315	0.683047	chr1_145395567_145395594	chr1_145395567_145395594	377.385	0.732215	0.255432	7.76642	0.00532264	0.0910268	0.349676	0.224582	0.107164	-0.389675	0.111596	-0.0184844
chr1_145395511_145395615	chr1_145395568_145395592	ATGCTCTACCGACTGAGCTAGCCGG	9	25	52324	minus	0.316958	0.124364	0.316958	chr1_145395568_145395592	chr1_145395568_145395592	266.726	0.566247	0.218145	6.8836	0.00869903	0.118468	0.402656	0.170496	0.0367254	-0.429166	0.756467	0.00310243
chr1_145395511_145395615	chr1_145395568_145395594	ATGCTCTACCGACTGAGCTAGCCGGGC	9	27	277889	minus	0.797504	0.495917	0.791253	chr1_145395568_145395594	chr1_145395568_145395594	1376.08	0.689312	0.211642	10.6196	0.00111897	0.0383167	0.186242	0.259292	0.0397072	-0.409194	0.134551	-0.0146153
chr1_145395511_145395615	chr1_145395569_145395592	TGCTCTACCGACTGAGCTAGCCGG	9	24	85113	minus	0.358685	0.254392	0.322882	chr1_145395569_145395592	chr1_145395569_145395592	418.127	0.130884	0.124953	1.13101	0.287561	0.652137	0.00159404	0.365981	0.309743	-0.119807	0.0682783	0.010641
chr1_145395511_145395615	chr1_145395569_145395594	TGCTCTACCGACTGAGCTAGCCGGGC	9	26	141846	minus	0.804545	0.549519	0.804545	chr1_145395569_145395594	chr1_145395569_145395594	675.147	0.512429	0.18859	7.24683	0.00710263	0.104273	0.104965	0.284406	0.0560279	-0.33998	0.463702	-0.00631137
chr1_145395511_145395615	chr1_145395570_145395592	GCTCTACCGACTGAGCTAGCCGG	9	23	31587	minus	0.452768	0.0921556	0.286137	chr1_145395570_145395592	chr1_145395570_145395592	148.101	-0.202149	0.124668	2.70811	0.0998392	0.407939	0.000989184	0.382276	0.843389	-0.0233148	0.00341248	0.0174663
chr1_145395511_145395615	chr1_145395570_145395594	GCTCTACCGACTGAGCTAGCCGGGC	9	25	107553	minus	0.734223	0.458258	0.731791	chr1_145395570_145395594	chr1_145395570_145395594	511.11	0.336342	0.164209	4.03023	0.0446919	0.272697	0.185401	0.203192	0.070371	-0.281684	0.96223	-0.000361728
chr1_145395511_145395615	chr1_145395571_145395594	CTCTACCGACTGAGCTAGCCGGGC	9	24	64582	minus	0.450458	0.41866	0.417781	chr1_145395571_145395594	chr1_145395571_145395594	306.943	-0.119175	0.104549	1.31079	0.252251	0.617308	0.00115536	0.317509	0.365796	-0.0894597	0.0310853	0.0103792
chr1_145395511_145395615	chr1_145395577_145395594	CGACTGAGCTAGCCGGGC	10	18	18016	minus	1	1	1	chr1_145395577_145395594	chr1_145395577_145395594	88.8609	0.309553	0.134911	5.11616	0.0237041	0.196404	0.0638559	-0.239119	0.105702	0.208891	0.0815276	-0.0106592
chr1_145395511_145395615	chr1_145395580_145395594	CTGAGCTAGCCGGGC	12	15	26325	minus	1	1	1	chr1_145395580_145395594	chr1_145395580_145395594	123	0.452415	0.257056	2.69653	0.100567	0.408813	0.384249	-0.231122	0.603389	0.126728	0.720662	0.00432362
chr1_145396839_145396997	chr1_145396881_145396899	TGCCGTGACTCGGATTCGA	10	19	42569	minus	1	1	1	chr1_145396881_145396899	chr1_145396881_145396899	229.622	0.219262	0.203798	1.06271	0.302597	0.664564	0.244842	0.231436	0.973349	-0.00660223	0.45235	0.00702131
chr1_145396839_145396997	chr1_145396897_145396918	CGAACCGAGGTTGCTGCGGCCA	10	22	32894	minus	1	1	1	chr1_145396897_145396918	chr1_145396897_145396918	166.758	0.249893	0.134708	3.44936	0.0632763	0.328749	0.371437	0.115556	0.0256129	-0.28701	0.433227	-0.00501409
chr1_145396839_145396997	chr1_145396920_145396937	AACGCAGAGTACTAACCA	9	18	8365	minus	0.554246	0.554246	0.554246	chr1_145396920_145396937	chr1_145396920_145396937	40.9733	-0.125799	0.17297	0.553055	0.457072	0.775218	0.0809962	0.285795	0.449101	0.126018	0.233101	0.00911701
chr1_145396839_145396997	chr1_145396921_145396937	ACGCAGAGTACTAACCA	9	17	14186	minus	0.554246	0.554246	0.554246	chr1_145396921_145396937	chr1_145396921_145396937	68.0114	0.0988173	0.164641	0.370201	0.542895	0.82169	0.19191	0.205169	0.557355	0.0923207	0.82959	-0.00161635
chr1_145396839_145396997	chr1_145396922_145396951	CGCAGAGTACTAACCACTATACGATCACGG	9	30	15209	minus	0.853814	0.75071	0.853814	chr1_145396922_145396951	chr1_145396922_145396951	80.702	0.619209	0.250381	6.15915	0.0130734	0.142524	0.393973	0.200642	0.00115783	-0.767911	0.277877	0.0121188
chr1_145396839_145396997	chr1_145396923_145396948	GCAGAGTACTAACCACTATACGATCA	11	26	9361	minus	0.566222	0.570836	0.566222	chr1_145396923_145396948	chr1_145396923_145396948	48.1894	0.185347	0.209655	0.818299	0.365678	0.719197	0.0302546	0.425364	0.00246408	-0.596734	0.178167	0.0122134
chr1_145396839_145396997	chr1_145396923_145396949	GCAGAGTACTAACCACTATACGATCAC	10	27	20334	minus	0.518471	0.530893	0.518471	chr1_145396923_145396949	chr1_145396923_145396949	98.6215	-0.0110438	0.175661	0.00406172	0.949184	0.981436	0.000333803	0.589518	0.0338418	-0.350072	0.0710852	0.0138855
chr1_145396839_145396997	chr1_145396923_145396951	GCAGAGTACTAACCACTATACGATCACGG	9	29	50992	minus	0.813203	0.648628	0.813203	chr1_145396923_145396951	chr1_145396923_145396951	267.549	0.641726	0.250305	6.6146	0.0101146	0.127474	0.0505211	0.455606	0.0160087	-0.565428	0.52185	0.00724809
chr1_145396839_145396997	chr1_145396925_145396949	AGAGTACTAACCACTATACGATCAC	12	25	7938	minus	0.46041	0.508549	0.406704	chr1_145396925_145396949	chr1_145396925_145396949	42.9993	0.176937	0.231828	0.586833	0.443646	0.76863	0.195606	0.283563	0.00805089	-0.583791	0.0185184	0.0233996
chr1_145396839_145396997	chr1_145396925_145396951	AGAGTACTAACCACTATACGATCACGG	11	27	7756	minus	0.648019	0.576189	0.414069	chr1_145396925_145396951	chr1_145396925_145396951	41.1095	0.461796	0.289881	2.50102	0.113772	0.437304	0.374801	0.242747	0.00685672	-0.746299	0.191358	0.0175574
chr1_145396839_145396997	chr1_145396926_145396949	GAGTACTAACCACTATACGATCAC	12	24	12795	minus	0.414687	0.514359	0.383942	chr1_145396926_145396949	chr1_145396926_145396949	69.0959	0.164588	0.227712	0.536344	0.463952	0.778178	0.0581179	0.401554	0.0512262	-0.421955	0.0338422	0.0216018
chr1_145396839_145396997	chr1_145396926_145396951	GAGTACTAACCACTATACGATCACGG	11	26	8172	minus	0.47822	0.416111	0.40568	chr1_145396926_145396951	chr1_145396926_145396951	45.1953	0.580888	0.309311	3.32799	0.06811	0.344228	0.0329187	0.624922	0.00357613	-0.861878	0.177408	0.0189775
chr1_145396839_145396997	chr1_145396927_145396949	AGTACTAACCACTATACGATCAC	12	23	8161	minus	0.320333	0.421136	0.320333	chr1_145396927_145396949	chr1_145396927_145396949	43.1093	0.290901	0.239988	1.53227	0.215772	0.57832	0.362184	0.205074	0.107318	-0.366331	0.17356	0.0139441
chr1_145396839_145396997	chr1_145396927_145396951	AGTACTAACCACTATACGATCACGG	11	25	32754	minus	0.695028	0.568128	0.634047	chr1_145396927_145396951	chr1_145396927_145396951	181.749	0.514568	0.25589	4.0364	0.0445288	0.272697	0.304592	0.249363	0.00195981	-0.75808	0.0112326	0.0293317
chr1_145396839_145396997	chr1_145396928_145396948	GTACTAACCACTATACGATCA	13	21	8517	minus	0.230787	0.333326	0.230787	chr1_145396928_145396948	chr1_145396928_145396948	43.9327	0.177332	0.213852	0.71603	0.397449	0.73865	0.190496	0.261743	0.0894062	-0.343026	0.622929	0.00468692
chr1_145396839_145396997	chr1_145396928_145396949	GTACTAACCACTATACGATCAC	12	22	12431	minus	0.344644	0.430834	0.256333	chr1_145396928_145396949	chr1_145396928_145396949	63.6667	0.337861	0.260217	1.75406	0.185367	0.540731	0.0394948	0.504837	0.141275	-0.359916	0.0904121	0.0195134
chr1_145396839_145396997	chr1_145396928_145396950	GTACTAACCACTATACGATCACG	11	23	9736	minus	0.445711	0.442728	0.436838	chr1_145396928_145396950	chr1_145396928_145396950	49.8407	0.460768	0.249008	3.53576	0.0600587	0.318344	0.0146853	0.56998	0.0386714	-0.483321	0.244645	0.0127936
chr1_145396839_145396997	chr1_145396928_145396951	GTACTAACCACTATACGATCACGG	11	24	78629	minus	0.644712	0.507834	0.458634	chr1_145396928_145396951	chr1_145396928_145396951	434.764	0.617754	0.262331	5.52668	0.0187286	0.173064	0.126115	0.37683	0.0127289	-0.619844	0.131275	0.0182249
chr1_145396839_145396997	chr1_145396929_145396949	TACTAACCACTATACGATCAC	12	21	20975	minus	0.279676	0.280846	0.218832	chr1_145396929_145396949	chr1_145396929_145396949	89.9198	1.46939	0.304508	18.0048	2.2035e-05	0.00390497	7.69601e-05	1.21387	5.00087e-05	-1.15744	0.627366	0.00685804
chr1_145396839_145396997	chr1_145396929_145396951	TACTAACCACTATACGATCACGG	11	23	8802	minus	0.374073	0.36522	0.277033	chr1_145396929_145396951	chr1_145396929_145396951	38.8266	1.28491	0.320432	14.3215	0.000154098	0.0118725	0.000419864	1.11709	9.59513e-05	-1.1878	0.645415	0.00713802
chr1_145396839_145396997	chr1_145396930_145396949	ACTAACCACTATACGATCAC	12	20	10751	minus	0.446423	0.398251	0.314903	chr1_145396930_145396949	chr1_145396930_145396949	50.4835	1.20003	0.263442	19.0258	1.28962e-05	0.00318107	0.00921859	0.649373	0.0050939	-0.6915	0.235755	0.014271
chr1_145396839_145396997	chr1_145396930_145396951	ACTAACCACTATACGATCACGG	11	22	8475	minus	0.284933	0.29677	0.284933	chr1_145396930_145396951	chr1_145396930_145396951	43.6026	0.651055	0.219839	8.51707	0.0035183	0.0721489	0.0399233	0.428326	0.00412697	-0.593827	0.0739935	0.0185301
chr1_145396839_145396997	chr1_145396933_145396952	AACCACTATACGATCACGGC	11	20	12349	minus	1	1	0.0334067	chr1_145396933_145396952	chr1_145396933_145396952	59.9372	0.186562	0.126684	2.13475	0.143994	0.484955	0.398042	0.101713	0.451285	-0.0907615	0.676841	0.00242548
chr1_145399216_145399339	chr1_145399250_145399272	GAACCCGGGCCGCGGCGGTGAGA	8	23	24137	minus	1	1	1	chr1_145399250_145399272	chr1_145399250_145399272	130.385	0.152082	0.291313	0.241147	0.623379	0.856674	0.825973	0.0603288	0.0597103	-0.539782	0.276987	-0.0152941
chr1_145399216_145399339	chr1_145399268_145399289	TGAGAGCGCCGAATCCTAACCA	10	22	28091	minus	NA	NA	0.11992	chr1_145399268_145399289	chr1_145399268_145399289	138.004	-0.0775919	0.0893806	0.759114	0.383606	0.730267	0.00135669	0.268766	0.0515005	-0.164444	0.00509939	0.0111546
chr1_145399216_145399339	chr1_145399270_145399304	AGAGCGCCGAATCCTAACCACTAGACCACCAGGGA	8	35	42824	minus	0.623967	0.623967	0.499253	chr1_145399270_145399304	chr1_145399270_145399304	199.468	0.116438	0.122908	0.876174	0.349252	0.709198	0.359881	-0.106398	0.0323533	-0.249403	0.613973	0.00283455
chr1_145399216_145399339	chr1_145399271_145399289	GAGCGCCGAATCCTAACCA	10	19	24034	minus	0.517193	0.307087	0.287477	chr1_145399271_145399289	chr1_145399271_145399289	112.673	0.00390834	0.12057	0.00108359	0.97374	0.990514	0.0706703	0.204245	0.192634	0.1497	0.0462764	0.0111026
chr1_145399216_145399339	chr1_145399271_145399291	GAGCGCCGAATCCTAACCACT	9	21	39504	minus	0.304462	0.252186	0.264186	chr1_145399271_145399291	chr1_145399271_145399291	189.801	-0.0633308	0.0974922	0.437946	0.508115	0.80061	0.00789919	0.242293	0.393092	-0.078957	0.0251364	0.00985221
chr1_145399216_145399339	chr1_145399271_145399304	GAGCGCCGAATCCTAACCACTAGACCACCAGGGA	8	34	33490	minus	0.440202	0.440202	0.440202	chr1_145399271_145399304	chr1_145399271_145399304	156.812	0.434543	0.143718	8.74767	0.00309998	0.068202	0.244728	0.160361	0.174507	-0.188877	0.0562735	-0.013021
chr1_145399216_145399339	chr1_145399272_145399289	AGCGCCGAATCCTAACCA	10	18	24127	minus	0.517193	0.202153	0.37479	chr1_145399272_145399289	chr1_145399272_145399289	112.736	0.0226467	0.129485	0.031256	0.85967	0.956995	0.615119	-0.0611999	0.166995	0.170008	0.315078	0.00594137
chr1_145399216_145399339	chr1_145399272_145399291	AGCGCCGAATCCTAACCACT	9	20	54879	minus	0.370005	0.338273	0.302532	chr1_145399272_145399291	chr1_145399272_145399291	263.981	-0.109027	0.0939389	1.3755	0.240869	0.610252	0.0386767	0.181537	0.244749	0.103963	0.00434882	0.0121871
chr1_145399216_145399339	chr1_145399272_145399292	AGCGCCGAATCCTAACCACTA	9	21	29542	minus	0.245741	0.245741	0.209395	chr1_145399272_145399292	chr1_145399272_145399292	142.971	-0.0984445	0.101524	0.943779	0.331308	0.691691	0.0096518	0.244983	0.52762	-0.0605799	0.00518465	0.0130336
chr1_145399216_145399339	chr1_145399272_145399304	AGCGCCGAATCCTAACCACTAGACCACCAGGGA	8	33	183344	minus	0.284625	0.284625	0.284625	chr1_145399272_145399304	chr1_145399272_145399304	859.441	0.144183	0.102955	1.86108	0.1725	0.522906	0.469792	-0.0701009	1.1016e-05	-0.43083	0.797099	0.00121785
chr1_145399216_145399339	chr1_145399273_145399291	GCGCCGAATCCTAACCACT	9	19	45133	minus	0.302991	0.331391	0.256595	chr1_145399273_145399291	chr1_145399273_145399291	213.577	-0.024996	0.0997242	0.0639696	0.800328	0.934908	0.675043	0.0392095	0.402333	0.0790888	0.0562749	0.0085557
chr1_145399216_145399339	chr1_145399273_145399292	GCGCCGAATCCTAACCACTA	9	20	23287	minus	0.290317	0.290317	0.28107	chr1_145399273_145399292	chr1_145399273_145399292	111.405	-0.107908	0.0943572	1.31423	0.25163	0.617308	0.500264	0.0594421	0.216888	-0.110148	0.200906	0.00546434
chr1_145399216_145399339	chr1_145399273_145399304	GCGCCGAATCCTAACCACTAGACCACCAGGGA	8	32	159624	minus	0.418443	0.418443	0.348822	chr1_145399273_145399304	chr1_145399273_145399304	743.595	0.00601417	0.14017	0.00164155	0.967682	0.988699	0.460052	-0.0963437	0.469927	-0.0970016	0.831977	0.00135581
chr1_145399216_145399339	chr1_145399274_145399304	CGCCGAATCCTAACCACTAGACCACCAGGGA	8	31	86891	minus	0.631756	0.631756	0.456466	chr1_145399274_145399304	chr1_145399274_145399304	411.063	-0.251919	0.198584	1.29957	0.254292	0.618699	0.354916	-0.175332	0.313252	-0.201436	0.0762656	-0.016781
chr1_145399216_145399339	chr1_145399275_145399292	GCCGAATCCTAACCACTA	12	18	24474	minus	NA	NA	0.383012	chr1_145399275_145399292	chr1_145399275_145399292	113.536	0.0501216	0.148452	0.120029	0.729003	0.90631	0.181688	-0.186051	0.221564	0.172435	0.547776	0.00416423
chr1_145399216_145399339	chr1_145399275_145399304	GCCGAATCCTAACCACTAGACCACCAGGGA	9	30	85633	minus	0.527261	0.527261	0.527261	chr1_145399275_145399304	chr1_145399275_145399304	400.766	-0.174248	0.116934	2.13003	0.144438	0.48531	0.566872	0.0623828	0.431394	-0.088191	0.76449	0.00157306
chr1_145399216_145399339	chr1_145399277_145399304	CGAATCCTAACCACTAGACCACCAGGGA	9	28	27921	minus	0.390341	0.390341	0.390341	chr1_145399277_145399304	chr1_145399277_145399304	130.864	-0.0301175	0.117132	0.0673395	0.795251	0.932344	0.618733	0.0545462	0.0517255	-0.218676	0.489309	0.00367407
chr1_145399216_145399339	chr1_145399278_145399304	GAATCCTAACCACTAGACCACCAGGGA	12	27	102132	minus	0.646157	0.646157	0.646157	chr1_145399278_145399304	chr1_145399278_145399304	479.116	-0.0227427	0.108884	0.0443429	0.833217	0.94752	0.524374	0.0653228	0.191735	-0.135155	0.842823	-0.000980812
chr1_145399216_145399339	chr1_145399279_145399304	AATCCTAACCACTAGACCACCAGGGA	13	26	410544	minus	0.622263	0.622263	0.546598	chr1_145399279_145399304	chr1_145399279_145399304	1905.94	-0.317742	0.155372	4.3652	0.0366801	0.249689	0.431285	0.11447	0.575893	0.0829988	0.197515	0.00926031
chr1_145399216_145399339	chr1_145399280_145399304	ATCCTAACCACTAGACCACCAGGGA	14	25	82652	minus	0.529179	0.529179	0.515772	chr1_145399280_145399304	chr1_145399280_145399304	395.811	-0.291009	0.096334	9.29948	0.00229219	0.0578968	0.58193	0.0499572	0.968946	0.00358631	0.314762	0.00435938
chr1_145399216_145399339	chr1_145399282_145399304	CCTAACCACTAGACCACCAGGGA	18	23	24924	minus	1	1	0.214017	chr1_145399282_145399304	chr1_145399282_145399304	125.368	-0.536764	0.119951	20.6386	5.54675e-06	0.00194705	0.15978	0.158713	0.678353	-0.0474977	0.684455	-0.00220122
chr1_145399216_145399339	chr1_145399287_145399304	CCACTAGACCACCAGGGA	38	18	32352	minus	1	1	0.636627	chr1_145399287_145399304	chr1_145399287_145399304	148.985	-0.118316	0.151788	0.661609	0.415992	0.753865	0.621125	-0.0707597	0.058132	0.278397	0.486681	0.00499242
chr1_146544766_146544876	chr1_146544773_146544792	GCCGTGATCGTATAGTGGTT	11	20	12349	plus	1	1	0.0334067	chr1_146544773_146544792	chr1_146544773_146544792	59.9372	0.186562	0.126684	2.13475	0.143994	0.484955	0.398042	0.101713	0.451285	-0.0907615	0.676841	0.00242548
chr1_146544766_146544876	chr1_146544774_146544795	CCGTGATCGTATAGTGGTTAGT	11	22	8475	plus	0.440503	0.384502	0.284933	chr1_146544774_146544795	chr1_146544774_146544795	43.6026	0.651055	0.219839	8.51707	0.0035183	0.0721489	0.0399233	0.428326	0.00412697	-0.593827	0.0739935	0.0185301
chr1_146544766_146544876	chr1_146544774_146544796	CCGTGATCGTATAGTGGTTAGTA	11	23	8802	plus	0.343797	0.334414	0.277033	chr1_146544774_146544796	chr1_146544774_146544796	38.8266	1.28491	0.320432	14.3215	0.000154098	0.0118725	0.000419864	1.11709	9.59513e-05	-1.1878	0.645415	0.00713802
chr1_146544766_146544876	chr1_146544774_146544797	CCGTGATCGTATAGTGGTTAGTAC	11	24	78629	plus	0.65574	0.53198	0.458634	chr1_146544774_146544797	chr1_146544774_146544797	434.764	0.617754	0.262331	5.52668	0.0187286	0.173064	0.126115	0.37683	0.0127289	-0.619844	0.131275	0.0182249
chr1_146544766_146544876	chr1_146544774_146544798	CCGTGATCGTATAGTGGTTAGTACT	11	25	32754	plus	0.730871	0.639413	0.634047	chr1_146544774_146544798	chr1_146544774_146544798	181.749	0.514568	0.25589	4.0364	0.0445288	0.272697	0.304592	0.249363	0.00195981	-0.75808	0.0112326	0.0293317
chr1_146544766_146544876	chr1_146544774_146544799	CCGTGATCGTATAGTGGTTAGTACTC	11	26	8172	plus	0.508768	0.422866	0.40568	chr1_146544774_146544799	chr1_146544774_146544799	45.1953	0.580888	0.309311	3.32799	0.06811	0.344228	0.0329187	0.624922	0.00357613	-0.861878	0.177408	0.0189775
chr1_146544766_146544876	chr1_146544774_146544800	CCGTGATCGTATAGTGGTTAGTACTCT	11	27	7756	plus	0.666385	0.592492	0.414069	chr1_146544774_146544800	chr1_146544774_146544800	41.1095	0.461796	0.289881	2.50102	0.113772	0.437304	0.374801	0.242747	0.00685672	-0.746299	0.191358	0.0175574
chr1_146544766_146544876	chr1_146544774_146544802	CCGTGATCGTATAGTGGTTAGTACTCTGC	9	29	50992	plus	0.853814	0.644954	0.813203	chr1_146544774_146544802	chr1_146544774_146544802	267.549	0.641726	0.250305	6.6146	0.0101146	0.127474	0.0505211	0.455606	0.0160087	-0.565428	0.52185	0.00724809
chr1_146544766_146544876	chr1_146544774_146544803	CCGTGATCGTATAGTGGTTAGTACTCTGCG	9	30	15209	plus	0.853814	0.732354	0.853814	chr1_146544774_146544803	chr1_146544774_146544803	80.702	0.619209	0.250381	6.15915	0.0130734	0.142524	0.393973	0.200642	0.00115783	-0.767911	0.277877	0.0121188
chr1_146544766_146544876	chr1_146544775_146544797	CGTGATCGTATAGTGGTTAGTAC	11	23	9736	plus	0.443499	0.440657	0.436838	chr1_146544775_146544797	chr1_146544775_146544797	49.8407	0.460768	0.249008	3.53576	0.0600587	0.318344	0.0146853	0.56998	0.0386714	-0.483321	0.244645	0.0127936
chr1_146544766_146544876	chr1_146544776_146544795	GTGATCGTATAGTGGTTAGT	12	20	10751	plus	0.33671	0.312995	0.314903	chr1_146544776_146544795	chr1_146544776_146544795	50.4835	1.20003	0.263442	19.0258	1.28962e-05	0.00318107	0.00921859	0.649373	0.0050939	-0.6915	0.235755	0.014271
chr1_146544766_146544876	chr1_146544776_146544796	GTGATCGTATAGTGGTTAGTA	12	21	20975	plus	0.25289	0.248912	0.218832	chr1_146544776_146544796	chr1_146544776_146544796	89.9198	1.46939	0.304508	18.0048	2.2035e-05	0.00390497	7.69601e-05	1.21387	5.00087e-05	-1.15744	0.627366	0.00685804
chr1_146544766_146544876	chr1_146544776_146544797	GTGATCGTATAGTGGTTAGTAC	12	22	12431	plus	0.367699	0.428458	0.256333	chr1_146544776_146544797	chr1_146544776_146544797	63.6667	0.337861	0.260217	1.75406	0.185367	0.540731	0.0394948	0.504837	0.141275	-0.359916	0.0904121	0.0195134
chr1_146544766_146544876	chr1_146544776_146544798	GTGATCGTATAGTGGTTAGTACT	12	23	8161	plus	0.413559	0.458239	0.320333	chr1_146544776_146544798	chr1_146544776_146544798	43.1093	0.290901	0.239988	1.53227	0.215772	0.57832	0.362184	0.205074	0.107318	-0.366331	0.17356	0.0139441
chr1_146544766_146544876	chr1_146544776_146544799	GTGATCGTATAGTGGTTAGTACTC	12	24	12795	plus	0.465331	0.504634	0.383942	chr1_146544776_146544799	chr1_146544776_146544799	69.0959	0.164588	0.227712	0.536344	0.463952	0.778178	0.0581179	0.401554	0.0512262	-0.421955	0.0338422	0.0216018
chr1_146544766_146544876	chr1_146544776_146544800	GTGATCGTATAGTGGTTAGTACTCT	12	25	7938	plus	0.453404	0.474636	0.406704	chr1_146544776_146544800	chr1_146544776_146544800	42.9993	0.176937	0.231828	0.586833	0.443646	0.76863	0.195606	0.283563	0.00805089	-0.583791	0.0185184	0.0233996
chr1_146544766_146544876	chr1_146544776_146544802	GTGATCGTATAGTGGTTAGTACTCTGC	10	27	20334	plus	0.585965	0.542739	0.518471	chr1_146544776_146544802	chr1_146544776_146544802	98.6215	-0.0110438	0.175661	0.00406172	0.949184	0.981436	0.000333803	0.589518	0.0338418	-0.350072	0.0710852	0.0138855
chr1_146544766_146544876	chr1_146544777_146544797	TGATCGTATAGTGGTTAGTAC	13	21	8517	plus	0.267075	0.284919	0.230787	chr1_146544777_146544797	chr1_146544777_146544797	43.9327	0.177332	0.213852	0.71603	0.397449	0.73865	0.190496	0.261743	0.0894062	-0.343026	0.622929	0.00468692
chr1_146544766_146544876	chr1_146544777_146544802	TGATCGTATAGTGGTTAGTACTCTGC	11	26	9361	plus	0.585965	0.585965	0.566222	chr1_146544777_146544802	chr1_146544777_146544802	48.1894	0.185347	0.209655	0.818299	0.365678	0.719197	0.0302546	0.425364	0.00246408	-0.596734	0.178167	0.0122134
chr1_146544766_146544876	chr1_146544788_146544804	TGGTTAGTACTCTGCGT	9	17	14186	plus	0.554246	0.554246	0.554246	chr1_146544788_146544804	chr1_146544788_146544804	68.0114	0.0988173	0.164641	0.370201	0.542895	0.82169	0.19191	0.205169	0.557355	0.0923207	0.82959	-0.00161635
chr1_146544766_146544876	chr1_146544788_146544805	TGGTTAGTACTCTGCGTT	9	18	8365	plus	0.554246	0.554246	0.554246	chr1_146544788_146544805	chr1_146544788_146544805	40.9733	-0.125799	0.17297	0.553055	0.457072	0.775218	0.0809962	0.285795	0.449101	0.126018	0.233101	0.00911701
chr1_146544766_146544876	chr1_146544807_146544828	TGGCCGCAGCAACCTCGGTTCG	10	22	32894	plus	1	1	1	chr1_146544807_146544828	chr1_146544807_146544828	166.758	0.249893	0.134708	3.44936	0.0632763	0.328749	0.371437	0.115556	0.0256129	-0.28701	0.433227	-0.00501409
chr1_146544766_146544876	chr1_146544826_146544844	TCGAATCCGAGTCACGGCA	10	19	42569	plus	1	1	1	chr1_146544826_146544844	chr1_146544826_146544844	229.622	0.219262	0.203798	1.06271	0.302597	0.664564	0.244842	0.231436	0.973349	-0.00660223	0.45235	0.00702131
chr1_147753451_147753617	chr1_147753471_147753490	GCCGTGATCGTATAGTGGTT	11	20	12349	plus	1	1	0.0334067	chr1_147753471_147753490	chr1_147753471_147753490	59.9372	0.186562	0.126684	2.13475	0.143994	0.484955	0.398042	0.101713	0.451285	-0.0907615	0.676841	0.00242548
chr1_147753451_147753617	chr1_147753472_147753493	CCGTGATCGTATAGTGGTTAGT	11	22	8475	plus	0.440503	0.384502	0.284933	chr1_147753472_147753493	chr1_147753472_147753493	43.6026	0.651055	0.219839	8.51707	0.0035183	0.0721489	0.0399233	0.428326	0.00412697	-0.593827	0.0739935	0.0185301
chr1_147753451_147753617	chr1_147753472_147753494	CCGTGATCGTATAGTGGTTAGTA	11	23	8802	plus	0.343797	0.334414	0.277033	chr1_147753472_147753494	chr1_147753472_147753494	38.8266	1.28491	0.320432	14.3215	0.000154098	0.0118725	0.000419864	1.11709	9.59513e-05	-1.1878	0.645415	0.00713802
chr1_147753451_147753617	chr1_147753472_147753495	CCGTGATCGTATAGTGGTTAGTAC	11	24	78629	plus	0.65574	0.53198	0.458634	chr1_147753472_147753495	chr1_147753472_147753495	434.764	0.617754	0.262331	5.52668	0.0187286	0.173064	0.126115	0.37683	0.0127289	-0.619844	0.131275	0.0182249
chr1_147753451_147753617	chr1_147753472_147753496	CCGTGATCGTATAGTGGTTAGTACT	11	25	32754	plus	0.730871	0.639413	0.634047	chr1_147753472_147753496	chr1_147753472_147753496	181.749	0.514568	0.25589	4.0364	0.0445288	0.272697	0.304592	0.249363	0.00195981	-0.75808	0.0112326	0.0293317
chr1_147753451_147753617	chr1_147753472_147753497	CCGTGATCGTATAGTGGTTAGTACTC	11	26	8172	plus	0.508768	0.422866	0.40568	chr1_147753472_147753497	chr1_147753472_147753497	45.1953	0.580888	0.309311	3.32799	0.06811	0.344228	0.0329187	0.624922	0.00357613	-0.861878	0.177408	0.0189775
chr1_147753451_147753617	chr1_147753472_147753498	CCGTGATCGTATAGTGGTTAGTACTCT	11	27	7756	plus	0.666385	0.592492	0.414069	chr1_147753472_147753498	chr1_147753472_147753498	41.1095	0.461796	0.289881	2.50102	0.113772	0.437304	0.374801	0.242747	0.00685672	-0.746299	0.191358	0.0175574
chr1_147753451_147753617	chr1_147753472_147753500	CCGTGATCGTATAGTGGTTAGTACTCTGC	9	29	50992	plus	0.853814	0.644954	0.813203	chr1_147753472_147753500	chr1_147753472_147753500	267.549	0.641726	0.250305	6.6146	0.0101146	0.127474	0.0505211	0.455606	0.0160087	-0.565428	0.52185	0.00724809
chr1_147753451_147753617	chr1_147753472_147753501	CCGTGATCGTATAGTGGTTAGTACTCTGCG	9	30	15209	plus	0.853814	0.732354	0.853814	chr1_147753472_147753501	chr1_147753472_147753501	80.702	0.619209	0.250381	6.15915	0.0130734	0.142524	0.393973	0.200642	0.00115783	-0.767911	0.277877	0.0121188
chr1_147753451_147753617	chr1_147753473_147753495	CGTGATCGTATAGTGGTTAGTAC	11	23	9736	plus	0.443499	0.440657	0.436838	chr1_147753473_147753495	chr1_147753473_147753495	49.8407	0.460768	0.249008	3.53576	0.0600587	0.318344	0.0146853	0.56998	0.0386714	-0.483321	0.244645	0.0127936
chr1_147753451_147753617	chr1_147753474_147753493	GTGATCGTATAGTGGTTAGT	12	20	10751	plus	0.33671	0.312995	0.314903	chr1_147753474_147753493	chr1_147753474_147753493	50.4835	1.20003	0.263442	19.0258	1.28962e-05	0.00318107	0.00921859	0.649373	0.0050939	-0.6915	0.235755	0.014271
chr1_147753451_147753617	chr1_147753474_147753494	GTGATCGTATAGTGGTTAGTA	12	21	20975	plus	0.25289	0.248912	0.218832	chr1_147753474_147753494	chr1_147753474_147753494	89.9198	1.46939	0.304508	18.0048	2.2035e-05	0.00390497	7.69601e-05	1.21387	5.00087e-05	-1.15744	0.627366	0.00685804
chr1_147753451_147753617	chr1_147753474_147753495	GTGATCGTATAGTGGTTAGTAC	12	22	12431	plus	0.367699	0.428458	0.256333	chr1_147753474_147753495	chr1_147753474_147753495	63.6667	0.337861	0.260217	1.75406	0.185367	0.540731	0.0394948	0.504837	0.141275	-0.359916	0.0904121	0.0195134
chr1_147753451_147753617	chr1_147753474_147753496	GTGATCGTATAGTGGTTAGTACT	12	23	8161	plus	0.413559	0.458239	0.320333	chr1_147753474_147753496	chr1_147753474_147753496	43.1093	0.290901	0.239988	1.53227	0.215772	0.57832	0.362184	0.205074	0.107318	-0.366331	0.17356	0.0139441
chr1_147753451_147753617	chr1_147753474_147753497	GTGATCGTATAGTGGTTAGTACTC	12	24	12795	plus	0.465331	0.504634	0.383942	chr1_147753474_147753497	chr1_147753474_147753497	69.0959	0.164588	0.227712	0.536344	0.463952	0.778178	0.0581179	0.401554	0.0512262	-0.421955	0.0338422	0.0216018
chr1_147753451_147753617	chr1_147753474_147753498	GTGATCGTATAGTGGTTAGTACTCT	12	25	7938	plus	0.453404	0.474636	0.406704	chr1_147753474_147753498	chr1_147753474_147753498	42.9993	0.176937	0.231828	0.586833	0.443646	0.76863	0.195606	0.283563	0.00805089	-0.583791	0.0185184	0.0233996
chr1_147753451_147753617	chr1_147753474_147753500	GTGATCGTATAGTGGTTAGTACTCTGC	10	27	20334	plus	0.585965	0.542739	0.518471	chr1_147753474_147753500	chr1_147753474_147753500	98.6215	-0.0110438	0.175661	0.00406172	0.949184	0.981436	0.000333803	0.589518	0.0338418	-0.350072	0.0710852	0.0138855
chr1_147753451_147753617	chr1_147753475_147753495	TGATCGTATAGTGGTTAGTAC	13	21	8517	plus	0.267075	0.284919	0.230787	chr1_147753475_147753495	chr1_147753475_147753495	43.9327	0.177332	0.213852	0.71603	0.397449	0.73865	0.190496	0.261743	0.0894062	-0.343026	0.622929	0.00468692
chr1_147753451_147753617	chr1_147753475_147753500	TGATCGTATAGTGGTTAGTACTCTGC	11	26	9361	plus	0.585965	0.585965	0.566222	chr1_147753475_147753500	chr1_147753475_147753500	48.1894	0.185347	0.209655	0.818299	0.365678	0.719197	0.0302546	0.425364	0.00246408	-0.596734	0.178167	0.0122134
chr1_147753451_147753617	chr1_147753486_147753502	TGGTTAGTACTCTGCGT	9	17	14186	plus	0.554246	0.554246	0.554246	chr1_147753486_147753502	chr1_147753486_147753502	68.0114	0.0988173	0.164641	0.370201	0.542895	0.82169	0.19191	0.205169	0.557355	0.0923207	0.82959	-0.00161635
chr1_147753451_147753617	chr1_147753486_147753503	TGGTTAGTACTCTGCGTT	9	18	8365	plus	0.554246	0.554246	0.554246	chr1_147753486_147753503	chr1_147753486_147753503	40.9733	-0.125799	0.17297	0.553055	0.457072	0.775218	0.0809962	0.285795	0.449101	0.126018	0.233101	0.00911701
chr1_147753451_147753617	chr1_147753505_147753526	TGGCCGCAGCAACCTCGGTTCG	10	22	32894	plus	1	1	1	chr1_147753505_147753526	chr1_147753505_147753526	166.758	0.249893	0.134708	3.44936	0.0632763	0.328749	0.371437	0.115556	0.0256129	-0.28701	0.433227	-0.00501409
chr1_147753451_147753617	chr1_147753524_147753542	TCGAATCCGAGTCACGGCA	10	19	42569	plus	1	1	1	chr1_147753524_147753542	chr1_147753524_147753542	229.622	0.219262	0.203798	1.06271	0.302597	0.664564	0.244842	0.231436	0.973349	-0.00660223	0.45235	0.00702131
chr1_147774813_147774941	chr1_147774845_147774863	TGCCGTGACTCGGATTCGA	10	19	42569	minus	1	1	1	chr1_147774845_147774863	chr1_147774845_147774863	229.622	0.219262	0.203798	1.06271	0.302597	0.664564	0.244842	0.231436	0.973349	-0.00660223	0.45235	0.00702131
chr1_147774813_147774941	chr1_147774861_147774882	CGAACCGAGGTTGCTGCGGCCA	10	22	32894	minus	1	1	1	chr1_147774861_147774882	chr1_147774861_147774882	166.758	0.249893	0.134708	3.44936	0.0632763	0.328749	0.371437	0.115556	0.0256129	-0.28701	0.433227	-0.00501409
chr1_147774813_147774941	chr1_147774884_147774901	AACGCAGAGTACTAACCA	9	18	8365	minus	0.554246	0.554246	0.554246	chr1_147774884_147774901	chr1_147774884_147774901	40.9733	-0.125799	0.17297	0.553055	0.457072	0.775218	0.0809962	0.285795	0.449101	0.126018	0.233101	0.00911701
chr1_147774813_147774941	chr1_147774885_147774901	ACGCAGAGTACTAACCA	9	17	14186	minus	0.554246	0.554246	0.554246	chr1_147774885_147774901	chr1_147774885_147774901	68.0114	0.0988173	0.164641	0.370201	0.542895	0.82169	0.19191	0.205169	0.557355	0.0923207	0.82959	-0.00161635
chr1_147774813_147774941	chr1_147774886_147774915	CGCAGAGTACTAACCACTATACGATCACGG	9	30	15209	minus	0.853814	0.75071	0.853814	chr1_147774886_147774915	chr1_147774886_147774915	80.702	0.619209	0.250381	6.15915	0.0130734	0.142524	0.393973	0.200642	0.00115783	-0.767911	0.277877	0.0121188
chr1_147774813_147774941	chr1_147774887_147774912	GCAGAGTACTAACCACTATACGATCA	11	26	9361	minus	0.566222	0.570836	0.566222	chr1_147774887_147774912	chr1_147774887_147774912	48.1894	0.185347	0.209655	0.818299	0.365678	0.719197	0.0302546	0.425364	0.00246408	-0.596734	0.178167	0.0122134
chr1_147774813_147774941	chr1_147774887_147774913	GCAGAGTACTAACCACTATACGATCAC	10	27	20334	minus	0.518471	0.530893	0.518471	chr1_147774887_147774913	chr1_147774887_147774913	98.6215	-0.0110438	0.175661	0.00406172	0.949184	0.981436	0.000333803	0.589518	0.0338418	-0.350072	0.0710852	0.0138855
chr1_147774813_147774941	chr1_147774887_147774915	GCAGAGTACTAACCACTATACGATCACGG	9	29	50992	minus	0.813203	0.648628	0.813203	chr1_147774887_147774915	chr1_147774887_147774915	267.549	0.641726	0.250305	6.6146	0.0101146	0.127474	0.0505211	0.455606	0.0160087	-0.565428	0.52185	0.00724809
chr1_147774813_147774941	chr1_147774889_147774913	AGAGTACTAACCACTATACGATCAC	12	25	7938	minus	0.46041	0.508549	0.406704	chr1_147774889_147774913	chr1_147774889_147774913	42.9993	0.176937	0.231828	0.586833	0.443646	0.76863	0.195606	0.283563	0.00805089	-0.583791	0.0185184	0.0233996
chr1_147774813_147774941	chr1_147774889_147774915	AGAGTACTAACCACTATACGATCACGG	11	27	7756	minus	0.648019	0.576189	0.414069	chr1_147774889_147774915	chr1_147774889_147774915	41.1095	0.461796	0.289881	2.50102	0.113772	0.437304	0.374801	0.242747	0.00685672	-0.746299	0.191358	0.0175574
chr1_147774813_147774941	chr1_147774890_147774913	GAGTACTAACCACTATACGATCAC	12	24	12795	minus	0.414687	0.514359	0.383942	chr1_147774890_147774913	chr1_147774890_147774913	69.0959	0.164588	0.227712	0.536344	0.463952	0.778178	0.0581179	0.401554	0.0512262	-0.421955	0.0338422	0.0216018
chr1_147774813_147774941	chr1_147774890_147774915	GAGTACTAACCACTATACGATCACGG	11	26	8172	minus	0.47822	0.416111	0.40568	chr1_147774890_147774915	chr1_147774890_147774915	45.1953	0.580888	0.309311	3.32799	0.06811	0.344228	0.0329187	0.624922	0.00357613	-0.861878	0.177408	0.0189775
chr1_147774813_147774941	chr1_147774891_147774913	AGTACTAACCACTATACGATCAC	12	23	8161	minus	0.320333	0.421136	0.320333	chr1_147774891_147774913	chr1_147774891_147774913	43.1093	0.290901	0.239988	1.53227	0.215772	0.57832	0.362184	0.205074	0.107318	-0.366331	0.17356	0.0139441
chr1_147774813_147774941	chr1_147774891_147774915	AGTACTAACCACTATACGATCACGG	11	25	32754	minus	0.695028	0.568128	0.634047	chr1_147774891_147774915	chr1_147774891_147774915	181.749	0.514568	0.25589	4.0364	0.0445288	0.272697	0.304592	0.249363	0.00195981	-0.75808	0.0112326	0.0293317
chr1_147774813_147774941	chr1_147774892_147774912	GTACTAACCACTATACGATCA	13	21	8517	minus	0.230787	0.333326	0.230787	chr1_147774892_147774912	chr1_147774892_147774912	43.9327	0.177332	0.213852	0.71603	0.397449	0.73865	0.190496	0.261743	0.0894062	-0.343026	0.622929	0.00468692
chr1_147774813_147774941	chr1_147774892_147774913	GTACTAACCACTATACGATCAC	12	22	12431	minus	0.344644	0.430834	0.256333	chr1_147774892_147774913	chr1_147774892_147774913	63.6667	0.337861	0.260217	1.75406	0.185367	0.540731	0.0394948	0.504837	0.141275	-0.359916	0.0904121	0.0195134
chr1_147774813_147774941	chr1_147774892_147774914	GTACTAACCACTATACGATCACG	11	23	9736	minus	0.445711	0.442728	0.436838	chr1_147774892_147774914	chr1_147774892_147774914	49.8407	0.460768	0.249008	3.53576	0.0600587	0.318344	0.0146853	0.56998	0.0386714	-0.483321	0.244645	0.0127936
chr1_147774813_147774941	chr1_147774892_147774915	GTACTAACCACTATACGATCACGG	11	24	78629	minus	0.644712	0.507834	0.458634	chr1_147774892_147774915	chr1_147774892_147774915	434.764	0.617754	0.262331	5.52668	0.0187286	0.173064	0.126115	0.37683	0.0127289	-0.619844	0.131275	0.0182249
chr1_147774813_147774941	chr1_147774893_147774913	TACTAACCACTATACGATCAC	12	21	20975	minus	0.279676	0.280846	0.218832	chr1_147774893_147774913	chr1_147774893_147774913	89.9198	1.46939	0.304508	18.0048	2.2035e-05	0.00390497	7.69601e-05	1.21387	5.00087e-05	-1.15744	0.627366	0.00685804
chr1_147774813_147774941	chr1_147774893_147774915	TACTAACCACTATACGATCACGG	11	23	8802	minus	0.374073	0.36522	0.277033	chr1_147774893_147774915	chr1_147774893_147774915	38.8266	1.28491	0.320432	14.3215	0.000154098	0.0118725	0.000419864	1.11709	9.59513e-05	-1.1878	0.645415	0.00713802
chr1_147774813_147774941	chr1_147774894_147774913	ACTAACCACTATACGATCAC	12	20	10751	minus	0.446423	0.398251	0.314903	chr1_147774894_147774913	chr1_147774894_147774913	50.4835	1.20003	0.263442	19.0258	1.28962e-05	0.00318107	0.00921859	0.649373	0.0050939	-0.6915	0.235755	0.014271
chr1_147774813_147774941	chr1_147774894_147774915	ACTAACCACTATACGATCACGG	11	22	8475	minus	0.284933	0.29677	0.284933	chr1_147774894_147774915	chr1_147774894_147774915	43.6026	0.651055	0.219839	8.51707	0.0035183	0.0721489	0.0399233	0.428326	0.00412697	-0.593827	0.0739935	0.0185301
chr1_147774813_147774941	chr1_147774897_147774916	AACCACTATACGATCACGGC	11	20	12349	minus	1	1	0.0334067	chr1_147774897_147774916	chr1_147774897_147774916	59.9372	0.186562	0.126684	2.13475	0.143994	0.484955	0.398042	0.101713	0.451285	-0.0907615	0.676841	0.00242548
chr1_149298542_149298648	chr1_149298595_149298627	AGGCGAACGTGATAACCACTACACTACGGAAAC	17	33	123895	minus	0.608712	0.608712	0.608712	chr1_149298595_149298627	chr1_149298595_149298627	562.195	0.142759	0.125989	1.28519	0.256936	0.620977	0.365398	-0.10669	0.000120017	-0.457704	0.699813	0.00217191
chr1_149298542_149298648	chr1_149298596_149298620	GGCGAACGTGATAACCACTACACTA	18	25	35834	minus	NA	0.521479	0.280592	chr1_149298596_149298620	chr1_149298596_149298620	180.692	0.120708	0.154659	0.597868	0.439392	0.765973	3.59198e-05	0.601124	0.00826226	-0.385772	0.00906798	0.0180339
chr1_149298542_149298648	chr1_149298596_149298623	GGCGAACGTGATAACCACTACACTACGG	17	28	33260	minus	NA	NA	Inf	chr1_149298596_149298623	chr1_149298596_149298623	156.083	0.160326	0.14628	1.19717	0.273888	0.637919	4.7874e-06	0.62641	0.415216	-0.112801	0.148074	0.00938442
chr1_149298542_149298648	chr1_149298596_149298627	GGCGAACGTGATAACCACTACACTACGGAAAC	17	32	122303	minus	0.717546	0.717546	0.717546	chr1_149298596_149298627	chr1_149298596_149298627	563.398	0.0371088	0.130934	0.0784616	0.779393	0.926913	0.842279	-0.0242976	0.00190229	-0.385162	0.581964	-0.0032479
chr1_149298542_149298648	chr1_149298597_149298627	GCGAACGTGATAACCACTACACTACGGAAAC	17	31	62774	minus	0.665592	0.665592	0.49677	chr1_149298597_149298627	chr1_149298597_149298627	293.68	0.100022	0.168849	0.333575	0.563562	0.831621	0.905128	0.0186904	0.0197634	-0.377022	0.11383	-0.0120673
chr1_149298542_149298648	chr1_149298600_149298627	AACGTGATAACCACTACACTACGGAAAC	19	28	42191	minus	0.564411	0.564411	0.564411	chr1_149298600_149298627	chr1_149298600_149298627	195.997	0.411644	0.124209	10.6	0.00113086	0.0383167	0.258714	-0.133416	0.0025833	-0.354939	0.499744	-0.00371017
chr1_149298542_149298648	chr1_149298601_149298627	ACGTGATAACCACTACACTACGGAAAC	19	27	57895	minus	0.327179	0.327179	0.327179	chr1_149298601_149298627	chr1_149298601_149298627	276.076	0.381325	0.141938	6.90613	0.00859006	0.117598	0.310406	0.135823	0.000339379	-0.478827	0.420993	0.00510821
chr1_149298542_149298648	chr1_149298602_149298627	CGTGATAACCACTACACTACGGAAAC	19	26	37307	minus	0.565905	0.565905	0.565905	chr1_149298602_149298627	chr1_149298602_149298627	172.77	0.318961	0.127386	5.89448	0.0151884	0.1552	0.0422774	-0.244417	0.11051	-0.193005	0.991661	6.04171e-05
chr1_149298542_149298648	chr1_149298603_149298627	GTGATAACCACTACACTACGGAAAC	19	25	139923	minus	0.616362	0.616362	0.616362	chr1_149298603_149298627	chr1_149298603_149298627	662.914	0.196062	0.107262	3.14958	0.0759464	0.358295	0.0912249	-0.171015	0.0343929	-0.214611	0.770676	0.00140972
chr1_149298542_149298648	chr1_149298604_149298627	TGATAACCACTACACTACGGAAAC	19	24	244522	minus	0.519997	0.519997	0.497659	chr1_149298604_149298627	chr1_149298604_149298627	1177.86	0.044321	0.0795715	0.299648	0.584103	0.841664	0.544829	-0.0454305	0.10816	-0.121302	0.110951	0.00576266
chr1_149298542_149298648	chr1_149298605_149298627	GATAACCACTACACTACGGAAAC	19	23	408816	minus	0.503617	0.503617	0.466188	chr1_149298605_149298627	chr1_149298605_149298627	2009.6	0.0176947	0.075315	0.0540434	0.816171	0.940566	0.876386	-0.0110409	0.12527	-0.109632	0.13062	0.00518247
chr1_149298542_149298648	chr1_149298606_149298627	ATAACCACTACACTACGGAAAC	20	22	427625	minus	0.372091	0.372091	0.112241	chr1_149298606_149298627	chr1_149298606_149298627	2127.13	-0.07268	0.056517	1.64307	0.199905	0.559519	0.745801	0.0172719	0.761618	-0.0162906	0.0214109	0.00589155
chr1_149298542_149298648	chr1_149298607_149298627	TAACCACTACACTACGGAAAC	20	21	27126	minus	0.122553	0.122553	0.0813375	chr1_149298607_149298627	chr1_149298607_149298627	134.177	-0.118194	0.0905663	1.68027	0.194889	0.553621	0.235929	0.101786	0.802764	0.0215739	0.192515	0.00523038
chr1_149298542_149298648	chr1_149298608_149298627	AACCACTACACTACGGAAAC	21	20	89857	minus	0.261722	0.261722	0.172311	chr1_149298608_149298627	chr1_149298608_149298627	438	-0.0103353	0.101812	0.0100672	0.920078	0.973674	0.503875	0.0652485	0.704029	0.0371063	0.57465	0.00257027
chr1_149298542_149298648	chr1_149298609_149298627	ACCACTACACTACGGAAAC	22	19	222496	minus	0.531342	0.531342	0.445394	chr1_149298609_149298627	chr1_149298609_149298627	1057.19	0.0776802	0.0793287	0.948816	0.330021	0.690645	3.26297e-05	-0.314572	0.261201	0.0849667	0.161632	-0.00501843
chr1_149298542_149298648	chr1_149298610_149298627	CCACTACACTACGGAAAC	22	18	108021	minus	0.736275	0.736275	0.575318	chr1_149298610_149298627	chr1_149298610_149298627	504.113	0.0133346	0.115564	0.0134288	0.907745	0.969858	0.00191899	-0.343187	0.502173	0.0740361	0.169953	-0.00715126
chr1_149298542_149298648	chr1_149298612_149298627	ACTACACTACGGAAAC	22	16	30411	minus	1	1	0.59055	chr1_149298612_149298627	chr1_149298612_149298627	138.884	0.163348	0.174019	0.864336	0.352528	0.710178	0.00881683	-0.444783	0.553992	0.0983305	0.100274	-0.0132447
chr1_149684062_149684172	chr1_149684129_149684161	AGGCGAACGTGATAACCACTACACTACGGAAAC	17	33	123895	minus	0.608712	0.608712	0.608712	chr1_149684129_149684161	chr1_149684129_149684161	562.195	0.142759	0.125989	1.28519	0.256936	0.620977	0.365398	-0.10669	0.000120017	-0.457704	0.699813	0.00217191
chr1_149684062_149684172	chr1_149684130_149684154	GGCGAACGTGATAACCACTACACTA	18	25	35834	minus	NA	0.521479	0.280592	chr1_149684130_149684154	chr1_149684130_149684154	180.692	0.120708	0.154659	0.597868	0.439392	0.765973	3.59198e-05	0.601124	0.00826226	-0.385772	0.00906798	0.0180339
chr1_149684062_149684172	chr1_149684130_149684157	GGCGAACGTGATAACCACTACACTACGG	17	28	33260	minus	NA	NA	Inf	chr1_149684130_149684157	chr1_149684130_149684157	156.083	0.160326	0.14628	1.19717	0.273888	0.637919	4.7874e-06	0.62641	0.415216	-0.112801	0.148074	0.00938442
chr1_149684062_149684172	chr1_149684130_149684161	GGCGAACGTGATAACCACTACACTACGGAAAC	17	32	122303	minus	0.717546	0.717546	0.717546	chr1_149684130_149684161	chr1_149684130_149684161	563.398	0.0371088	0.130934	0.0784616	0.779393	0.926913	0.842279	-0.0242976	0.00190229	-0.385162	0.581964	-0.0032479
chr1_149684062_149684172	chr1_149684131_149684161	GCGAACGTGATAACCACTACACTACGGAAAC	17	31	62774	minus	0.665592	0.665592	0.49677	chr1_149684131_149684161	chr1_149684131_149684161	293.68	0.100022	0.168849	0.333575	0.563562	0.831621	0.905128	0.0186904	0.0197634	-0.377022	0.11383	-0.0120673
chr1_149684062_149684172	chr1_149684134_149684161	AACGTGATAACCACTACACTACGGAAAC	19	28	42191	minus	0.564411	0.564411	0.564411	chr1_149684134_149684161	chr1_149684134_149684161	195.997	0.411644	0.124209	10.6	0.00113086	0.0383167	0.258714	-0.133416	0.0025833	-0.354939	0.499744	-0.00371017
chr1_149684062_149684172	chr1_149684135_149684161	ACGTGATAACCACTACACTACGGAAAC	19	27	57895	minus	0.327179	0.327179	0.327179	chr1_149684135_149684161	chr1_149684135_149684161	276.076	0.381325	0.141938	6.90613	0.00859006	0.117598	0.310406	0.135823	0.000339379	-0.478827	0.420993	0.00510821
chr1_149684062_149684172	chr1_149684136_149684161	CGTGATAACCACTACACTACGGAAAC	19	26	37307	minus	0.565905	0.565905	0.565905	chr1_149684136_149684161	chr1_149684136_149684161	172.77	0.318961	0.127386	5.89448	0.0151884	0.1552	0.0422774	-0.244417	0.11051	-0.193005	0.991661	6.04171e-05
chr1_149684062_149684172	chr1_149684137_149684161	GTGATAACCACTACACTACGGAAAC	19	25	139923	minus	0.616362	0.616362	0.616362	chr1_149684137_149684161	chr1_149684137_149684161	662.914	0.196062	0.107262	3.14958	0.0759464	0.358295	0.0912249	-0.171015	0.0343929	-0.214611	0.770676	0.00140972
chr1_149684062_149684172	chr1_149684138_149684161	TGATAACCACTACACTACGGAAAC	19	24	244522	minus	0.519997	0.519997	0.497659	chr1_149684138_149684161	chr1_149684138_149684161	1177.86	0.044321	0.0795715	0.299648	0.584103	0.841664	0.544829	-0.0454305	0.10816	-0.121302	0.110951	0.00576266
chr1_149684062_149684172	chr1_149684139_149684161	GATAACCACTACACTACGGAAAC	19	23	408816	minus	0.503617	0.503617	0.466188	chr1_149684139_149684161	chr1_149684139_149684161	2009.6	0.0176947	0.075315	0.0540434	0.816171	0.940566	0.876386	-0.0110409	0.12527	-0.109632	0.13062	0.00518247
chr1_149684062_149684172	chr1_149684140_149684161	ATAACCACTACACTACGGAAAC	20	22	427625	minus	0.372091	0.372091	0.112241	chr1_149684140_149684161	chr1_149684140_149684161	2127.13	-0.07268	0.056517	1.64307	0.199905	0.559519	0.745801	0.0172719	0.761618	-0.0162906	0.0214109	0.00589155
chr1_149684062_149684172	chr1_149684141_149684161	TAACCACTACACTACGGAAAC	20	21	27126	minus	0.122553	0.122553	0.0813375	chr1_149684141_149684161	chr1_149684141_149684161	134.177	-0.118194	0.0905663	1.68027	0.194889	0.553621	0.235929	0.101786	0.802764	0.0215739	0.192515	0.00523038
chr1_149684062_149684172	chr1_149684142_149684161	AACCACTACACTACGGAAAC	21	20	89857	minus	0.261722	0.261722	0.172311	chr1_149684142_149684161	chr1_149684142_149684161	438	-0.0103353	0.101812	0.0100672	0.920078	0.973674	0.503875	0.0652485	0.704029	0.0371063	0.57465	0.00257027
chr1_149684062_149684172	chr1_149684143_149684161	ACCACTACACTACGGAAAC	22	19	222496	minus	0.531342	0.531342	0.445394	chr1_149684143_149684161	chr1_149684143_149684161	1057.19	0.0776802	0.0793287	0.948816	0.330021	0.690645	3.26297e-05	-0.314572	0.261201	0.0849667	0.161632	-0.00501843
chr1_149684062_149684172	chr1_149684144_149684161	CCACTACACTACGGAAAC	22	18	108021	minus	0.736275	0.736275	0.575318	chr1_149684144_149684161	chr1_149684144_149684161	504.113	0.0133346	0.115564	0.0134288	0.907745	0.969858	0.00191899	-0.343187	0.502173	0.0740361	0.169953	-0.00715126
chr1_149684062_149684172	chr1_149684146_149684161	ACTACACTACGGAAAC	22	16	30411	minus	1	1	0.59055	chr1_149684146_149684161	chr1_149684146_149684161	138.884	0.163348	0.174019	0.864336	0.352528	0.710178	0.00881683	-0.444783	0.553992	0.0983305	0.100274	-0.0132447
chr1_151411477_151411579	chr1_151411487_151411507	TGGTAGTGGGTTATCAGAACT	31	21	643618	plus	1	1	0.63746	chr1_151411487_151411507	chr1_151411487_151411507	3273.53	-0.334572	0.12628	7.19315	0.00731824	0.105515	0.175452	0.162744	0.0522889	0.237668	0.611725	0.00286047
chr1_151411477_151411579	chr1_151411544_151411568	CCCCCACTGCTAAATTTGACTGGCT	15	25	632842	plus	0.391235	0.389402	0.116487	chr1_151411544_151411568	chr1_151411544_151411568	3307.75	0.212603	0.147593	1.85145	0.173614	0.524311	0.720452	-0.050574	0.0520119	-0.272233	0.439943	-0.00522254
chr1_151411477_151411579	chr1_151411544_151411569	CCCCCACTGCTAAATTTGACTGGCTT	12	26	6967940	plus	0.305728	0.303556	0.287648	chr1_151411544_151411569	chr1_151411544_151411569	35306.5	-0.052561	0.162767	0.0993866	0.752567	0.917871	0.14816	-0.226881	0.763652	-0.0469654	0.199679	-0.00956303
chr1_151411477_151411579	chr1_151411545_151411566	CCCCACTGCTAAATTTGACTGG	19	22	561071	plus	0.504959	0.504959	0.217591	chr1_151411545_151411566	chr1_151411545_151411566	3037.86	0.115017	0.176616	0.409672	0.522136	0.810717	0.0255927	0.376704	0.561972	-0.0985222	0.649375	-0.0035722
chr1_151411477_151411579	chr1_151411545_151411567	CCCCACTGCTAAATTTGACTGGC	17	23	1260789	plus	0.13515	0.13515	0.131571	chr1_151411545_151411567	chr1_151411545_151411567	6907.76	0.256103	0.176107	2.01712	0.155534	0.501825	0.0527945	0.325112	0.114695	-0.265016	0.284236	-0.00842412
chr1_151411477_151411579	chr1_151411545_151411568	CCCCACTGCTAAATTTGACTGGCT	17	24	4707284	plus	0.35306	0.35306	0.338498	chr1_151411545_151411568	chr1_151411545_151411568	25427.2	0.105602	0.140086	0.549367	0.458576	0.775218	0.00315255	0.392886	0.0924702	-0.2249	0.578526	-0.00351774
chr1_151411477_151411579	chr1_151411545_151411569	CCCCACTGCTAAATTTGACTGGCTT	14	25	31689760	plus	0.445125	0.445125	0.396731	chr1_151411545_151411569	chr1_151411545_151411569	167250	-0.141331	0.153725	0.851839	0.356033	0.712394	0.0191837	0.341076	0.605542	0.0764191	0.800575	-0.00179157
chr1_151411477_151411579	chr1_151411546_151411569	CCCACTGCTAAATTTGACTGGCTT	19	24	1509874	plus	0.877466	0.744267	0.41602	chr1_151411546_151411569	chr1_151411546_151411569	8010.62	-0.134967	0.142374	0.899538	0.342906	0.703122	0.0090123	0.351677	0.633025	0.0653709	0.897401	-0.000851278
chr1_152181172_152181197	chr1_152181179_152181193	AGAAGGCCCCTTGGT	8	15	5116	minus	0.718033	0.702015	0.703156	chr1_152181179_152181193	chr1_152181179_152181193	24.5432	0.100894	0.262155	0.128323	0.720177	0.903113	0.0380464	-0.570897	0.242435	0.29305	0.755494	-0.00380277
chr1_152181172_152181197	chr1_152181179_152181194	AGAAGGCCCCTTGGTG	5	16	61772	minus	0.87203	0.87203	0.871135	chr1_152181179_152181194	chr1_152181179_152181194	308.981	0.146726	0.312304	0.170894	0.679319	0.885674	0.458372	-0.254611	0.834431	0.0625274	0.256934	-0.0167945
chr1_152181172_152181197	chr1_152181179_152181195	AGAAGGCCCCTTGGTGT	1	17	60871	minus	0.865823	0.858754	0.865823	chr1_152181179_152181195	chr1_152181179_152181195	299.113	0.360066	0.297944	1.15324	0.282872	0.649164	0.670469	-0.13296	0.989633	0.00369435	0.0822947	-0.0246231
chr1_152181172_152181197	chr1_152181180_152181194	GAAGGCCCCTTGGTG	8	15	24285	minus	0.822345	0.822345	0.822345	chr1_152181180_152181194	chr1_152181180_152181194	126.02	0.224271	0.325336	0.374327	0.540655	0.821483	0.331642	-0.349951	0.37495	0.283934	0.374894	-0.0137609
chr1_152181172_152181197	chr1_152181180_152181195	GAAGGCCCCTTGGTGT	3	16	43555	minus	0.856536	0.850641	0.856536	chr1_152181180_152181195	chr1_152181180_152181195	215.153	0.146709	0.307136	0.187353	0.665129	0.878411	0.315148	-0.33191	0.585648	-0.162578	0.084538	-0.0261807
chr1_153643719_153643822	chr1_153643726_153643741	AGCAGAGTGGCGCAGC	9	16	9787	plus	0.490922	0.490922	0.490922	chr1_153643726_153643741	chr1_153643726_153643741	45.3635	-0.0138998	0.177841	0.00608917	0.937802	0.979918	0.262986	-0.194444	0.838605	0.0345216	0.862122	-0.00136638
chr1_153643719_153643822	chr1_153643726_153643742	AGCAGAGTGGCGCAGCG	9	17	11678	plus	0.401144	0.401144	0.401144	chr1_153643726_153643742	chr1_153643726_153643742	53.4636	-0.0603458	0.162645	0.137769	0.710509	0.900391	0.0243889	-0.355214	0.97124	-0.00560597	0.0601084	-0.0137595
chr1_153643719_153643822	chr1_153643726_153643743	AGCAGAGTGGCGCAGCGG	9	18	10476	plus	0.30464	0.30464	0.30464	chr1_153643726_153643743	chr1_153643726_153643743	48.53	-0.107194	0.121014	0.791076	0.373775	0.725189	0.152958	-0.165656	0.733732	0.0391031	0.664224	-0.00230971
chr1_153643719_153643822	chr1_153643726_153643744	AGCAGAGTGGCGCAGCGGA	9	19	38579	plus	0.152997	0.152997	0.152997	chr1_153643726_153643744	chr1_153643726_153643744	180.367	-0.105439	0.109723	0.957592	0.327794	0.689749	0.848053	-0.0199691	0.626824	-0.0505635	0.129484	0.00732022
chr1_153643719_153643822	chr1_153643726_153643745	AGCAGAGTGGCGCAGCGGAA	9	20	22248	plus	0.176055	0.176055	0.151089	chr1_153643726_153643745	chr1_153643726_153643745	109.522	-0.129621	0.0995669	1.69902	0.192417	0.552067	0.574453	-0.0529504	0.352744	-0.087729	0.00714527	0.0118117
chr1_153643719_153643822	chr1_153643726_153643746	AGCAGAGTGGCGCAGCGGAAG	9	21	16923	plus	0.165937	0.165937	0.111062	chr1_153643726_153643746	chr1_153643726_153643746	82.1337	-0.168758	0.0967232	2.91441	0.0877916	0.380296	0.953766	-0.00530554	0.0399299	-0.187421	0.147876	0.00618333
chr1_153643719_153643822	chr1_153643726_153643747	AGCAGAGTGGCGCAGCGGAAGC	9	22	24190	plus	0.213726	0.213726	0.213726	chr1_153643726_153643747	chr1_153643726_153643747	118.716	-0.364657	0.100759	12.9124	0.000326415	0.0189481	0.770839	0.0277311	0.880601	0.0143936	0.344969	0.00421556
chr1_153643719_153643822	chr1_153643726_153643748	AGCAGAGTGGCGCAGCGGAAGCG	9	23	21186	plus	0.222017	0.222017	0.222017	chr1_153643726_153643748	chr1_153643726_153643748	104.212	-0.237053	0.0924485	6.46738	0.0109873	0.130775	0.987971	0.00130996	0.777431	-0.0247341	0.637452	0.00197094
chr1_153643719_153643822	chr1_153643726_153643749	AGCAGAGTGGCGCAGCGGAAGCGT	9	24	32241	plus	0.244722	0.244722	0.244722	chr1_153643726_153643749	chr1_153643726_153643749	154.472	-0.156651	0.0837448	3.45167	0.063188	0.328749	0.508564	-0.0524529	0.0761754	-0.140541	0.337728	0.00362634
chr1_153643719_153643822	chr1_153643726_153643750	AGCAGAGTGGCGCAGCGGAAGCGTG	9	25	30897	plus	0.216764	0.216764	0.216764	chr1_153643726_153643750	chr1_153643726_153643750	146.634	-0.196383	0.106826	3.29393	0.0695366	0.347556	0.273214	0.111229	0.160688	-0.142432	0.126326	0.00734828
chr1_153643719_153643822	chr1_153643726_153643751	AGCAGAGTGGCGCAGCGGAAGCGTGC	9	26	34572	plus	0.293634	0.293634	0.246273	chr1_153643726_153643751	chr1_153643726_153643751	171.589	-0.0393311	0.155229	0.0630445	0.801747	0.935255	0.810304	0.0354233	0.00326085	-0.432681	0.0242941	0.0146342
chr1_153643719_153643822	chr1_153643726_153643752	AGCAGAGTGGCGCAGCGGAAGCGTGCT	9	27	34230	plus	0.419366	0.419366	0.294711	chr1_153643726_153643752	chr1_153643726_153643752	162.991	0.441657	0.125575	11.8909	0.0005641	0.0257632	0.85735	0.0215901	0.000120508	-0.453959	0.932602	-0.000463129
chr1_153643719_153643822	chr1_153643726_153643755	AGCAGAGTGGCGCAGCGGAAGCGTGCTGGG	9	30	26398	plus	0.505404	0.505404	0.505404	chr1_153643726_153643755	chr1_153643726_153643755	113.028	0.898579	0.214819	17.2342	3.30432e-05	0.004508	0.01038	0.552174	4.43066e-10	-1.28994	1.35754e-05	-0.0389945
chr1_153643719_153643822	chr1_153643726_153643756	AGCAGAGTGGCGCAGCGGAAGCGTGCTGGGC	9	31	114087	plus	0.449694	0.449694	0.449694	chr1_153643726_153643756	chr1_153643726_153643756	492.724	1.13758	0.242508	20.9596	4.69074e-06	0.00194595	0.0211623	0.567467	9.93728e-07	-1.18953	0.0361347	-0.0221579
chr1_153643719_153643822	chr1_153643726_153643757	AGCAGAGTGGCGCAGCGGAAGCGTGCTGGGCC	9	32	27732	plus	0.456301	0.456301	0.425494	chr1_153643726_153643757	chr1_153643726_153643757	130.192	0.266168	0.144548	3.02543	0.0819687	0.372097	0.575697	0.0761297	0.000144272	-0.527104	0.83718	-0.00142845
chr1_153643719_153643822	chr1_153643726_153643758	AGCAGAGTGGCGCAGCGGAAGCGTGCTGGGCCC	9	33	31624	plus	0.473053	0.473053	0.368859	chr1_153643726_153643758	chr1_153643726_153643758	154.522	0.280504	0.126259	4.60368	0.0319033	0.228908	0.062256	0.223033	0.000102176	-0.46442	0.226955	0.00689272
chr1_153643719_153643822	chr1_153643739_153643758	AGCGGAAGCGTGCTGGGCCC	10	20	10855	plus	NA	0.251479	Inf	chr1_153643739_153643758	chr1_153643739_153643758	55.3708	0.220233	0.191361	1.31805	0.250942	0.616657	0.705312	-0.0680556	0.594144	-0.0965016	0.0849144	0.0150992
chr1_153643719_153643822	chr1_153643741_153643756	CGGAAGCGTGCTGGGC	10	16	9955	plus	0.508718	0.331814	0.508718	chr1_153643741_153643756	chr1_153643741_153643756	47.6917	0.513665	0.203054	6.08496	0.0136337	0.146417	0.30362	0.207969	0.84676	-0.0374617	0.709329	-0.00333035
chr1_153643719_153643822	chr1_153643741_153643758	CGGAAGCGTGCTGGGCCC	10	18	24171	plus	NA	0.251479	0.508718	chr1_153643741_153643758	chr1_153643741_153643758	120.263	0.437588	0.16546	6.93038	0.00847438	0.116744	0.812988	0.0376351	0.604684	-0.0814168	0.298916	0.00750038
chr1_154151871_154151902	chr1_154151876_154151890	CCACCAGGCCCACGA	5	15	17721	minus	0.796131	0.711857	0.796131	chr1_154151876_154151890	chr1_154151876_154151890	80.5848	0.531402	0.267298	3.40131	0.0651447	0.33537	0.505087	-0.176492	0.32112	0.258856	0.0279271	-0.0282466
chr1_154151871_154151902	chr1_154151876_154151891	CCACCAGGCCCACGAA	2	16	13226	minus	0.770024	0.769476	0.770024	chr1_154151876_154151891	chr1_154151876_154151891	58.9269	0.631913	0.275017	4.62913	0.0314335	0.227441	0.24778	-0.314553	0.553751	0.159816	0.0425095	-0.0264767
chr1_154151871_154151902	chr1_154151876_154151892	CCACCAGGCCCACGAAT	2	17	15586	minus	0.807551	0.797911	0.759052	chr1_154151876_154151892	chr1_154151876_154151892	68.5458	0.78363	0.253196	8.43984	0.00367089	0.0745286	0.268439	-0.278411	0.962603	-0.0116962	0.0586798	-0.0224134
chr1_154151871_154151902	chr1_154151876_154151893	CCACCAGGCCCACGAATA	1	18	25870	minus	0.763136	0.730614	0.763136	chr1_154151876_154151893	chr1_154151876_154151893	116.683	0.347998	0.216919	2.32259	0.127507	0.462527	0.0441094	-0.428497	0.818015	0.0484097	0.0352448	-0.0210221
chr1_154151871_154151902	chr1_154151877_154151891	CACCAGGCCCACGAA	2	15	47580	minus	0.81549	0.792214	0.81549	chr1_154151877_154151891	chr1_154151877_154151891	215.036	1.51948	0.287547	22.3954	2.219e-06	0.00166979	0.22187	-0.358243	0.17405	0.39448	0.27238	-0.015447
chr1_154151871_154151902	chr1_154151877_154151892	CACCAGGCCCACGAAT	2	16	29857	minus	0.833163	0.823963	0.833163	chr1_154151877_154151892	chr1_154151877_154151892	128.657	1.58197	0.300111	23.1352	1.51001e-06	0.00142566	0.353312	-0.280937	0.503957	0.20197	0.139326	-0.0214806
chr1_154151871_154151902	chr1_154151877_154151893	CACCAGGCCCACGAATA	1	17	69278	minus	0.835859	0.821029	0.835859	chr1_154151877_154151893	chr1_154151877_154151893	305.213	0.950096	0.250237	12.7167	0.000362396	0.0200655	0.15096	-0.356197	0.741865	0.0809466	0.0823804	-0.0202142
chr1_154151871_154151902	chr1_154151878_154151892	ACCAGGCCCACGAAT	2	15	11046	minus	0.772693	0.772693	0.772693	chr1_154151878_154151892	chr1_154151878_154151892	49.6962	1.83565	0.317923	25.9885	3.43462e-07	0.00058775	0.265692	-0.366863	0.0834184	0.567713	0.387917	-0.0138591
chr1_154151871_154151902	chr1_154151878_154151893	ACCAGGCCCACGAATA	1	16	20990	minus	0.857886	0.862997	0.857886	chr1_154151878_154151893	chr1_154151878_154151893	91.9583	1.17838	0.276746	15.6081	7.79212e-05	0.00761788	0.201196	-0.355056	0.394904	0.23447	0.106376	-0.0213866
chr1_154151871_154151902	chr1_154151879_154151893	CCAGGCCCACGAATA	2	15	3064	minus	0.623821	0.623821	0.623821	chr1_154151879_154151893	chr1_154151879_154151893	13.7764	0.765312	0.273005	6.77241	0.00925779	0.12239	0.104165	-0.443244	0.152245	0.382387	0.238388	-0.0152285
chr1_155164965_155165074	chr1_155164987_155165007	AGGGACGGGACGCGGTGCAGT	1	21	8321	plus	0.0606509	0.0606509	0.0606509	hsa-mir-92b	chr1_155164987_155165007	44.4871	-0.0226509	0.173352	0.0166279	0.897398	0.969362	0.013558	0.415737	0.462756	-0.12181	0.126825	0.011602
chr1_155164965_155165074	chr1_155164987_155165009	AGGGACGGGACGCGGTGCAGTGT	1	23	10438	plus	1	1	1	hsa-mir-92b	chr1_155164987_155165009	53.3495	-0.0224199	0.121024	0.0349325	0.851737	0.954646	0.112242	0.183609	0.683736	-0.0470255	0.759418	0.00171652
chr1_155164965_155165074	chr1_155165028_155165046	TATTGCACTCGTCCCGGCC	1	19	49033	plus	0.634587	0.634587	0.634587	hsa-mir-92b	chr1_155165028_155165046	258.057	0.306389	0.191024	2.37777	0.123073	0.45309	0.760444	-0.0571222	0.504188	0.124172	0.574913	-0.00490837
chr1_155164965_155165074	chr1_155165028_155165047	TATTGCACTCGTCCCGGCCT	1	20	121394	plus	0.385216	0.385216	0.385216	hsa-mir-92b	chr1_155165028_155165047	624.491	0.148561	0.154946	0.875545	0.349425	0.709198	0.72028	-0.0540383	0.709767	0.0551116	0.116151	-0.0111273
chr1_155164965_155165074	chr1_155165028_155165048	TATTGCACTCGTCCCGGCCTC	1	21	40504	plus	0.596515	0.596515	0.596515	hsa-mir-92b	chr1_155165028_155165048	203.883	0.0676438	0.123483	0.294365	0.587437	0.843951	0.508292	-0.0779015	0.357649	-0.107784	0.175806	-0.00760241
chr1_155164965_155165074	chr1_155165028_155165049	TATTGCACTCGTCCCGGCCTCC	1	22	201923	plus	0.614131	0.614131	0.614131	hsa-mir-92b	chr1_155165028_155165049	1020.05	-0.0328118	0.136378	0.0576157	0.810305	0.93842	0.959688	-0.00651741	0.33533	-0.12458	0.717516	-0.00223281
chr1_156390142_156390169	chr1_156390144_156390166	TTACTTTCGGTTATCTAGCTTTA	2	23	1523	minus	0.057035	0.057035	0.057035	hsa-mir-9-1	chr1_156390144_156390166	7.23746	-0.436139	0.262141	2.77576	0.0957012	0.401302	0.744075	0.0841265	0.51331	-0.164852	0.253777	0.0145353
chr1_156390142_156390169	chr1_156390145_156390166	TACTTTCGGTTATCTAGCTTTA	3	22	18761	minus	0.29071	0.29071	0.29071	hsa-mir-9-1	chr1_156390145_156390166	93.9049	0.163282	0.15603	1.06298	0.302537	0.664564	0.29288	0.159554	0.962972	-0.00700077	0.529831	-0.0044354
chr1_156390142_156390169	chr1_156390145_156390167	TACTTTCGGTTATCTAGCTTTAT	3	23	7758	minus	0.268452	0.268452	0.268452	hsa-mir-9-1	chr1_156390145_156390167	38.8668	-0.000308095	0.148132	4.07464e-06	0.998389	0.999393	0.749413	0.0452092	0.686487	-0.0576586	0.930407	0.000575547
chr1_156390142_156390169	chr1_156390146_156390166	ACTTTCGGTTATCTAGCTTTA	3	21	5797	minus	0.110094	0.110094	0.109004	hsa-mir-9-1	chr1_156390146_156390166	28.7329	-0.163203	0.149688	1.1564	0.282214	0.648348	0.62903	0.0701814	0.664229	0.0622748	0.512628	-0.00445181
chr1_156390142_156390169	chr1_156390146_156390167	ACTTTCGGTTATCTAGCTTTAT	3	22	57293	minus	0.260399	0.260399	0.260399	hsa-mir-9-1	chr1_156390146_156390167	290.247	0.0192812	0.107542	0.0312761	0.859626	0.956995	0.773127	-0.0296541	0.0403616	-0.210346	0.765394	-0.0014397
chr1_156390142_156390169	chr1_156390147_156390166	CTTTCGGTTATCTAGCTTTA	3	20	1001	minus	0.0149483	0.0149483	0.00930287	hsa-mir-9-1	chr1_156390147_156390166	4.81767	0.472972	0.28602	2.62256	0.105354	0.419364	0.00964873	-0.709255	0.47193	0.195076	0.0348124	-0.0258716
chr1_156390142_156390169	chr1_156390147_156390167	CTTTCGGTTATCTAGCTTTAT	3	21	2188	minus	0.114612	0.114612	0.104998	hsa-mir-9-1	chr1_156390147_156390167	10.9024	0.0726863	0.203628	0.130577	0.717834	0.902488	0.156624	-0.273128	0.800551	0.0493414	0.720401	-0.00331471
chr1_156611798_156611880	chr1_156611802_156611816	CGAGAGCCCCGCGCT	2	15	82048	minus	NA	NA	Inf	chr1_156611802_156611816	chr1_156611802_156611816	379.356	0.158573	0.37613	0.148505	0.699968	0.896811	0.0559708	-0.714385	0.265972	-0.394716	0.871089	-0.00317663
chr1_161369433_161369574	chr1_161369530_161369562	AGGCGAACGTGATAACCACTACACTACGGAAAC	17	33	123895	minus	0.608712	0.608712	0.608712	chr1_161369530_161369562	chr1_161369530_161369562	562.195	0.142759	0.125989	1.28519	0.256936	0.620977	0.365398	-0.10669	0.000120017	-0.457704	0.699813	0.00217191
chr1_161369433_161369574	chr1_161369531_161369555	GGCGAACGTGATAACCACTACACTA	18	25	35834	minus	NA	0.521479	0.280592	chr1_161369531_161369555	chr1_161369531_161369555	180.692	0.120708	0.154659	0.597868	0.439392	0.765973	3.59198e-05	0.601124	0.00826226	-0.385772	0.00906798	0.0180339
chr1_161369433_161369574	chr1_161369531_161369558	GGCGAACGTGATAACCACTACACTACGG	17	28	33260	minus	NA	NA	Inf	chr1_161369531_161369558	chr1_161369531_161369558	156.083	0.160326	0.14628	1.19717	0.273888	0.637919	4.7874e-06	0.62641	0.415216	-0.112801	0.148074	0.00938442
chr1_161369433_161369574	chr1_161369531_161369562	GGCGAACGTGATAACCACTACACTACGGAAAC	17	32	122303	minus	0.717546	0.717546	0.717546	chr1_161369531_161369562	chr1_161369531_161369562	563.398	0.0371088	0.130934	0.0784616	0.779393	0.926913	0.842279	-0.0242976	0.00190229	-0.385162	0.581964	-0.0032479
chr1_161369433_161369574	chr1_161369532_161369562	GCGAACGTGATAACCACTACACTACGGAAAC	17	31	62774	minus	0.665592	0.665592	0.49677	chr1_161369532_161369562	chr1_161369532_161369562	293.68	0.100022	0.168849	0.333575	0.563562	0.831621	0.905128	0.0186904	0.0197634	-0.377022	0.11383	-0.0120673
chr1_161369433_161369574	chr1_161369535_161369562	AACGTGATAACCACTACACTACGGAAAC	19	28	42191	minus	0.564411	0.564411	0.564411	chr1_161369535_161369562	chr1_161369535_161369562	195.997	0.411644	0.124209	10.6	0.00113086	0.0383167	0.258714	-0.133416	0.0025833	-0.354939	0.499744	-0.00371017
chr1_161369433_161369574	chr1_161369536_161369562	ACGTGATAACCACTACACTACGGAAAC	19	27	57895	minus	0.327179	0.327179	0.327179	chr1_161369536_161369562	chr1_161369536_161369562	276.076	0.381325	0.141938	6.90613	0.00859006	0.117598	0.310406	0.135823	0.000339379	-0.478827	0.420993	0.00510821
chr1_161369433_161369574	chr1_161369537_161369562	CGTGATAACCACTACACTACGGAAAC	19	26	37307	minus	0.565905	0.565905	0.565905	chr1_161369537_161369562	chr1_161369537_161369562	172.77	0.318961	0.127386	5.89448	0.0151884	0.1552	0.0422774	-0.244417	0.11051	-0.193005	0.991661	6.04171e-05
chr1_161369433_161369574	chr1_161369538_161369562	GTGATAACCACTACACTACGGAAAC	19	25	139923	minus	0.616362	0.616362	0.616362	chr1_161369538_161369562	chr1_161369538_161369562	662.914	0.196062	0.107262	3.14958	0.0759464	0.358295	0.0912249	-0.171015	0.0343929	-0.214611	0.770676	0.00140972
chr1_161369433_161369574	chr1_161369539_161369562	TGATAACCACTACACTACGGAAAC	19	24	244522	minus	0.519997	0.519997	0.497659	chr1_161369539_161369562	chr1_161369539_161369562	1177.86	0.044321	0.0795715	0.299648	0.584103	0.841664	0.544829	-0.0454305	0.10816	-0.121302	0.110951	0.00576266
chr1_161369433_161369574	chr1_161369540_161369562	GATAACCACTACACTACGGAAAC	19	23	408816	minus	0.530822	0.530822	0.466188	chr1_161369540_161369562	chr1_161369540_161369562	2009.6	0.0176947	0.075315	0.0540434	0.816171	0.940566	0.876386	-0.0110409	0.12527	-0.109632	0.13062	0.00518247
chr1_161369433_161369574	chr1_161369541_161369562	ATAACCACTACACTACGGAAAC	20	22	427625	minus	0.389158	0.389158	0.112241	chr1_161369541_161369562	chr1_161369541_161369562	2127.13	-0.07268	0.056517	1.64307	0.199905	0.559519	0.745801	0.0172719	0.761618	-0.0162906	0.0214109	0.00589155
chr1_161369433_161369574	chr1_161369543_161369562	AACCACTACACTACGGAAAC	21	20	89857	minus	0.25768	0.25768	0.172311	chr1_161369543_161369562	chr1_161369543_161369562	438	-0.0103353	0.101812	0.0100672	0.920078	0.973674	0.503875	0.0652485	0.704029	0.0371063	0.57465	0.00257027
chr1_161369433_161369574	chr1_161369544_161369562	ACCACTACACTACGGAAAC	22	19	222496	minus	0.531342	0.531342	0.445394	chr1_161369544_161369562	chr1_161369544_161369562	1057.19	0.0776802	0.0793287	0.948816	0.330021	0.690645	3.26297e-05	-0.314572	0.261201	0.0849667	0.161632	-0.00501843
chr1_161369433_161369574	chr1_161369545_161369562	CCACTACACTACGGAAAC	22	18	108021	minus	0.736275	0.736275	0.575318	chr1_161369545_161369562	chr1_161369545_161369562	504.113	0.0133346	0.115564	0.0134288	0.907745	0.969858	0.00191899	-0.343187	0.502173	0.0740361	0.169953	-0.00715126
chr1_161369433_161369574	chr1_161369547_161369562	ACTACACTACGGAAAC	22	16	30411	minus	1	1	0.59055	chr1_161369547_161369562	chr1_161369547_161369562	138.884	0.163348	0.174019	0.864336	0.352528	0.710178	0.00881683	-0.444783	0.553992	0.0983305	0.100274	-0.0132447
chr1_161410600_161410696	chr1_161410634_161410655	ACCCCGGTCTCCCGCGTGACAG	14	22	36341	minus	0.555459	0.555459	0.191651	chr1_161410634_161410655	chr1_161410634_161410655	175.385	-0.270436	0.135964	3.88964	0.0485847	0.284133	0.000324817	0.456329	0.0119582	-0.322075	0.00347446	0.0178385
chr1_161410600_161410696	chr1_161410634_161410656	ACCCCGGTCTCCCGCGTGACAGG	13	23	28132	minus	0.555459	0.555459	0.421527	chr1_161410634_161410656	chr1_161410634_161410656	135.998	-0.0627228	0.138479	0.201095	0.653839	0.871944	5.32222e-05	0.522718	0.00415006	-0.374016	0.0304838	0.0135228
chr1_161410600_161410696	chr1_161410644_161410668	CCCGCGTGACAGGCGGGGATACTCA	12	25	10722	minus	1	1	1	chr1_161410644_161410668	chr1_161410644_161410668	53.7974	0.00141068	0.241514	3.88505e-05	0.995027	0.998335	0.101762	0.372591	0.043524	-0.469905	0.296468	0.0121143
chr1_161410600_161410696	chr1_161410655_161410686	GGCGGGGATACTCACCACTATACTAACGAGGA	11	32	13030	minus	0.160448	0.160448	0.160448	chr1_161410655_161410686	chr1_161410655_161410686	61.5618	-0.188196	0.126363	2.14879	0.142682	0.484155	0.000235295	0.436748	0.0111849	-0.30496	0.273668	0.00637543
chr1_161410600_161410696	chr1_161410657_161410686	CGGGGATACTCACCACTATACTAACGAGGA	11	30	17484	minus	1	1	0.160448	chr1_161410657_161410686	chr1_161410657_161410686	84.6194	-0.0426808	0.103269	0.169293	0.680741	0.885721	0.000950394	0.32224	0.0119671	-0.245111	0.000342116	0.0164198
chr1_161410600_161410696	chr1_161410660_161410686	GGATACTCACCACTATACTAACGAGGA	11	27	8922	minus	0.0774888	0.0774888	0.0774888	chr1_161410660_161410686	chr1_161410660_161410686	42.3773	0.0102026	0.106555	0.00891834	0.924762	0.975063	0.806288	-0.024865	0.0329199	-0.215899	0.0375956	0.00988621
chr1_161410600_161410696	chr1_161410661_161410686	GATACTCACCACTATACTAACGAGGA	11	26	12709	minus	0.195564	0.195564	0.195564	chr1_161410661_161410686	chr1_161410661_161410686	60.4991	0.0527041	0.117246	0.199111	0.655439	0.871944	0.153553	-0.158934	0.920301	-0.0111753	0.941941	-0.00038622
chr1_161410600_161410696	chr1_161410662_161410686	ATACTCACCACTATACTAACGAGGA	11	25	37784	minus	0.329427	0.329427	0.329427	chr1_161410662_161410686	chr1_161410662_161410686	192.787	-0.343725	0.117814	8.688	0.00320312	0.0693291	0.192508	0.146545	0.34371	0.10748	0.421215	0.0042158
chr1_161410600_161410696	chr1_161410663_161410686	TACTCACCACTATACTAACGAGGA	11	24	32994	minus	0.41231	0.41231	0.41231	chr1_161410663_161410686	chr1_161410663_161410686	167.997	-0.263603	0.096224	7.6729	0.00560562	0.0917953	0.0535866	0.176839	0.534221	0.0576637	0.368092	0.00392808
chr1_161410600_161410696	chr1_161410664_161410686	ACTCACCACTATACTAACGAGGA	12	23	175888	minus	0.387891	0.387891	0.353586	chr1_161410664_161410686	chr1_161410664_161410686	912.363	-0.334096	0.0934186	12.8894	0.00033045	0.0189481	0.0217036	0.204478	0.966021	0.00382869	0.768727	-0.00123
chr1_161410600_161410696	chr1_161410665_161410686	CTCACCACTATACTAACGAGGA	12	22	42627	minus	0.308702	0.308702	0.308702	chr1_161410665_161410686	chr1_161410665_161410686	221.723	-0.211665	0.0935664	5.06845	0.0243651	0.200125	0.0299989	0.193178	0.0861914	-0.154546	0.150277	0.00586636
chr1_161410600_161410696	chr1_161410666_161410686	TCACCACTATACTAACGAGGA	13	21	28356	minus	0.274487	0.274487	0.239256	chr1_161410666_161410686	chr1_161410666_161410686	143.649	-0.174902	0.0823619	4.52187	0.0334642	0.234065	0.661896	0.0340644	0.935878	0.00632972	0.0766742	0.00662168
chr1_161410600_161410696	chr1_161410667_161410686	CACCACTATACTAACGAGGA	13	20	62030	minus	0.184425	0.184425	0.175903	chr1_161410667_161410686	chr1_161410667_161410686	311.684	-0.184486	0.0675483	7.47213	0.00626612	0.0978677	0.302568	0.0660909	0.306665	0.0660745	0.0861223	0.00524874
chr1_161410600_161410696	chr1_161410669_161410686	CCACTATACTAACGAGGA	16	18	17931	minus	1	1	0.0099193	chr1_161410669_161410686	chr1_161410669_161410686	84.776	0.107176	0.120082	0.755558	0.384722	0.730267	0.149365	-0.168651	0.661822	0.0504524	0.468784	-0.00401808
chr1_161411314_161411416	chr1_161411323_161411342	GTCAGGATGGCCGAGCGGTC	10	20	10527	plus	0.0291528	0.0291528	0.0291528	chr1_161411323_161411342	chr1_161411323_161411342	51.8857	-0.0800282	0.0936424	0.714319	0.398014	0.739147	0.417007	0.0724876	0.338368	-0.0852608	0.0146119	0.0100994
chr1_161411314_161411416	chr1_161411323_161411343	GTCAGGATGGCCGAGCGGTCT	10	21	13537	plus	0.147399	0.147399	0.144598	chr1_161411323_161411343	chr1_161411323_161411343	67.6756	-0.287318	0.0888585	10.4733	0.00121112	0.0395947	0.219591	0.102857	0.200707	-0.108309	0.117447	0.00629945
chr1_161411314_161411416	chr1_161411323_161411344	GTCAGGATGGCCGAGCGGTCTA	10	22	50714	plus	0.11039	0.0497522	0.105456	chr1_161411323_161411344	chr1_161411323_161411344	260.387	-0.0447406	0.0884	0.26086	0.60953	0.853531	0.0424087	0.168032	0.883573	-0.0123134	0.0170836	0.0094945
chr1_161411314_161411416	chr1_161411323_161411346	GTCAGGATGGCCGAGCGGTCTAAG	10	24	34375	plus	0.0987519	0.435681	0.0264978	chr1_161411323_161411346	chr1_161411323_161411346	181.167	0.0897428	0.172893	0.257955	0.611529	0.853531	0.00371702	0.471466	0.0104598	-0.418606	0.0224296	0.0170265
chr1_161411314_161411416	chr1_161411323_161411347	GTCAGGATGGCCGAGCGGTCTAAGG	10	25	40802	plus	0.0273354	1.02933e-05	0.0250451	chr1_161411323_161411347	chr1_161411323_161411347	193.709	-0.14578	0.0979878	2.15229	0.142357	0.484155	0.819643	-0.0209595	0.333265	-0.0899659	0.0184093	0.0104944
chr1_161411314_161411416	chr1_161411323_161411348	GTCAGGATGGCCGAGCGGTCTAAGGC	10	26	35440	plus	0.0753514	0.131707	0.0753514	chr1_161411323_161411348	chr1_161411323_161411348	177.69	0.0712735	0.170946	0.169816	0.680275	0.885721	0.0718034	0.291818	0.00179004	-0.508976	0.0346479	0.0154365
chr1_161411314_161411416	chr1_161411323_161411352	GTCAGGATGGCCGAGCGGTCTAAGGCGCTG	10	30	16938	plus	0.730675	0.730675	0.730675	chr1_161411323_161411352	chr1_161411323_161411352	92.3331	0.506279	0.21726	5.02467	0.0249887	0.201886	0.0249535	0.466339	0.00258489	-0.630782	0.0213419	0.0217956
chr1_161411314_161411416	chr1_161411323_161411353	GTCAGGATGGCCGAGCGGTCTAAGGCGCTGC	9	31	32894	plus	0.730675	0.730675	0.730675	chr1_161411323_161411353	chr1_161411323_161411353	169.476	0.169392	0.185415	0.792077	0.373473	0.725189	0.0069593	0.478848	0.0151656	-0.43013	0.00692146	0.0216899
chr1_161411314_161411416	chr1_161411326_161411346	AGGATGGCCGAGCGGTCTAAG	10	21	156640	plus	0.504191	0.504191	0.504191	chr1_161411326_161411346	chr1_161411326_161411346	804.141	-0.0652589	0.190667	0.118371	0.730808	0.906844	1.6597e-05	0.772422	0.0478219	-0.354887	0.0382647	0.0169104
chr1_161411314_161411416	chr1_161411326_161411348	AGGATGGCCGAGCGGTCTAAGGC	10	23	12188	plus	NA	NA	0.504191	chr1_161411326_161411348	chr1_161411326_161411348	65.3318	0.314708	0.211066	2.19705	0.138275	0.480118	0.053414	0.384815	0.0547005	-0.385582	0.0144092	0.0221394
chr1_161411314_161411416	chr1_161411338_161411354	CGGTCTAAGGCGCTGCG	9	17	8235	plus	NA	NA	Inf	chr1_161411338_161411354	chr1_161411338_161411354	41.6796	-0.126161	0.219054	0.336058	0.562114	0.83094	0.0955982	0.352818	0.69297	-0.0829452	0.419517	0.0080547
chr1_161411314_161411416	chr1_161411355_161411372	TTCAGGTCGCAGTCTCCC	9	18	8499	plus	1	1	1	chr1_161411355_161411372	chr1_161411355_161411372	37.7262	0.311364	0.174679	3.12049	0.0773134	0.361223	0.0769411	0.294666	0.113627	0.26565	0.257442	0.00909373
chr1_161411314_161411416	chr1_161411367_161411387	TCTCCCCTGGAGGCGTGGGTT	9	21	15877	plus	1	1	1	chr1_161411367_161411387	chr1_161411367_161411387	83.3303	0.0852664	0.184066	0.203214	0.652139	0.871471	0.059337	0.331019	0.0695428	-0.320235	0.877282	0.00130566
chr1_161413087_161413206	chr1_161413094_161413110	GCATGGGTGGTTCAGTG	9	17	13586	plus	0.374534	0.374534	0.374534	chr1_161413094_161413110	chr1_161413094_161413110	62.166	0.124843	0.187747	0.483845	0.486686	0.78956	0.033542	-0.379083	0.0202671	0.421911	0.767514	-0.00257134
chr1_161413087_161413206	chr1_161413094_161413111	GCATGGGTGGTTCAGTGG	7	18	33139	plus	0.396071	0.396071	0.396071	chr1_161413094_161413111	chr1_161413094_161413111	158.82	-0.0154056	0.148717	0.0112082	0.915687	0.9729	0.934595	-0.0114596	0.892946	0.0191022	0.558411	0.00396265
chr1_161413087_161413206	chr1_161413094_161413112	GCATGGGTGGTTCAGTGGT	6	19	18476	plus	0.523541	0.523541	0.517632	chr1_161413094_161413112	chr1_161413094_161413112	88.4217	-0.0616443	0.14084	0.20006	0.654672	0.871944	0.60246	0.068352	0.500123	0.0904566	0.406685	0.00526482
chr1_161413087_161413206	chr1_161413094_161413113	GCATGGGTGGTTCAGTGGTA	6	20	55255	plus	0.384495	0.384495	0.384495	chr1_161413094_161413113	chr1_161413094_161413113	276.83	-0.117828	0.145584	0.680935	0.409265	0.750146	0.0010128	0.447183	0.928264	-0.0124678	0.0962124	0.0107193
chr1_161413087_161413206	chr1_161413094_161413114	GCATGGGTGGTTCAGTGGTAG	6	21	27491	plus	0.38241	0.38241	0.381246	chr1_161413094_161413114	chr1_161413094_161413114	136.077	-0.0567963	0.108204	0.279624	0.596948	0.848796	0.958325	0.00527302	0.208702	-0.128955	0.11327	0.00784687
chr1_161413087_161413206	chr1_161413094_161413115	GCATGGGTGGTTCAGTGGTAGA	6	22	26655	plus	0.292305	0.292305	0.214777	chr1_161413094_161413115	chr1_161413094_161413115	127.663	-0.36451	0.12233	9.24523	0.0023611	0.0589038	0.325418	0.112988	0.0149044	0.285469	0.0157665	0.0133812
chr1_161413087_161413206	chr1_161413094_161413116	GCATGGGTGGTTCAGTGGTAGAA	6	23	24491	plus	0.299013	0.299013	0.299013	chr1_161413094_161413116	chr1_161413094_161413116	122.147	-0.196539	0.114519	3.05297	0.0805897	0.370257	0.0894094	0.181717	0.322549	-0.107305	0.0220907	0.0117976
chr1_161413087_161413206	chr1_161413094_161413117	GCATGGGTGGTTCAGTGGTAGAAT	6	24	21197	plus	0.390264	0.390264	0.388621	chr1_161413094_161413117	chr1_161413094_161413117	103.942	-0.165954	0.117812	2.01695	0.155551	0.501825	0.257127	0.125253	0.946683	0.00747319	0.152078	0.00763133
chr1_161413087_161413206	chr1_161413094_161413118	GCATGGGTGGTTCAGTGGTAGAATT	6	25	35953	plus	0.426702	0.426702	0.314498	chr1_161413094_161413118	chr1_161413094_161413118	170.382	-0.167597	0.141926	1.40334	0.236166	0.605137	0.891962	0.0180981	0.120592	0.211026	0.39957	0.00558212
chr1_161413087_161413206	chr1_161413094_161413119	GCATGGGTGGTTCAGTGGTAGAATTC	6	26	18629	plus	0.529493	0.529493	0.496281	chr1_161413094_161413119	chr1_161413094_161413119	88.285	-0.144214	0.127469	1.30462	0.253371	0.617889	0.486209	0.0833829	0.51534	0.0789816	0.377237	0.00513619
chr1_161413087_161413206	chr1_161413094_161413120	GCATGGGTGGTTCAGTGGTAGAATTCT	6	27	9188	plus	0.543522	0.543522	0.496714	chr1_161413094_161413120	chr1_161413094_161413120	42.645	-0.101856	0.147608	0.491557	0.483233	0.78956	0.770046	-0.0404919	0.265967	0.15662	0.442094	0.00528889
chr1_161413087_161413206	chr1_161413094_161413121	GCATGGGTGGTTCAGTGGTAGAATTCTC	5	28	11632	plus	0.548816	0.548816	0.531281	chr1_161413094_161413121	chr1_161413094_161413121	53.924	-0.0505288	0.129924	0.155508	0.693326	0.893471	0.869254	0.0200488	0.200418	0.158316	0.663191	0.00259484
chr1_161413087_161413206	chr1_161413094_161413123	GCATGGGTGGTTCAGTGGTAGAATTCTCGC	5	30	26129	plus	0.674369	0.674369	0.625875	chr1_161413094_161413123	chr1_161413094_161413123	121.779	-0.275163	0.150091	3.20786	0.0732852	0.352671	0.434024	0.109047	0.344517	0.136331	0.704937	0.00263923
chr1_161413087_161413206	chr1_161413094_161413124	GCATGGGTGGTTCAGTGGTAGAATTCTCGCC	5	31	16545	plus	0.674369	0.674369	0.674369	chr1_161413094_161413124	chr1_161413094_161413124	77.0366	-0.297474	0.14642	4.04213	0.0443777	0.272697	0.835106	0.0284174	0.767651	0.0412854	0.0744249	-0.0123175
chr1_161413087_161413206	chr1_161413099_161413116	GGTGGTTCAGTGGTAGAA	29	18	30760	plus	0.557785	0.557785	0.369994	chr1_161413099_161413116	chr1_161413099_161413116	145.044	0.0451021	0.123379	0.138408	0.709869	0.900391	0.329573	-0.114001	0.0267719	0.261561	0.413985	0.00457384
chr1_161413087_161413206	chr1_161413099_161413117	GGTGGTTCAGTGGTAGAAT	29	19	22282	plus	0.557785	0.557785	0.349957	chr1_161413099_161413117	chr1_161413099_161413117	105.931	-0.0831226	0.105102	0.653655	0.418809	0.753865	0.851593	-0.018465	0.0140155	0.246356	0.00886422	0.0124083
chr1_161413087_161413206	chr1_161413112_161413131	TAGAATTCTCGCCTGCCACG	12	20	11967	plus	1	1	1	chr1_161413112_161413131	chr1_161413112_161413131	60.3167	-0.0929714	0.114779	0.65416	0.418629	0.753865	0.000189937	0.403707	0.393083	0.0936883	0.000441792	0.0181103
chr1_161413087_161413206	chr1_161413120_161413145	TCGCCTGCCACGCGGGAGGCCCGGGT	12	26	19408	plus	NA	0.2515	Inf	chr1_161413120_161413145	chr1_161413120_161413145	92.2705	0.164422	0.12285	1.71183	0.190748	0.548659	0.0419314	0.234126	0.277641	-0.126377	0.317512	0.00562327
chr1_161413087_161413206	chr1_161413123_161413145	CCTGCCACGCGGGAGGCCCGGGT	12	23	22892	plus	0.587803	0.539009	0.587803	chr1_161413123_161413145	chr1_161413123_161413145	112.404	0.224225	0.140977	2.4114	0.120454	0.450196	0.467813	0.0962048	0.465644	-0.0974643	0.902761	0.000796124
chr1_161413087_161413206	chr1_161413124_161413145	CTGCCACGCGGGAGGCCCGGGT	12	22	21001	plus	0.531942	0.531942	0.531942	chr1_161413124_161413145	chr1_161413124_161413145	104.966	0.135976	0.124827	1.12399	0.289062	0.653623	0.414784	0.0962305	0.985889	0.00211347	0.718064	0.00205647
chr1_161413087_161413206	chr1_161413125_161413145	TGCCACGCGGGAGGCCCGGGT	12	21	11705	plus	0.430752	0.444221	0.430752	chr1_161413125_161413145	chr1_161413125_161413145	57.0707	0.095959	0.131957	0.511934	0.474303	0.783641	0.0287807	0.272343	0.942547	-0.0090294	0.302113	0.00635894
chr1_161417001_161417137	chr1_161417035_161417057	GAACCCGGGCCGCGGCGGTGAGA	8	23	24137	minus	1	1	1	chr1_161417035_161417057	chr1_161417035_161417057	130.385	0.152082	0.291313	0.241147	0.623379	0.856674	0.825973	0.0603288	0.0597103	-0.539782	0.276987	-0.0152941
chr1_161417001_161417137	chr1_161417053_161417074	TGAGAGCGCCGAATCCTAACCA	10	22	28091	minus	NA	NA	0.11992	chr1_161417053_161417074	chr1_161417053_161417074	138.004	-0.0775919	0.0893806	0.759114	0.383606	0.730267	0.00135669	0.268766	0.0515005	-0.164444	0.00509939	0.0111546
chr1_161417001_161417137	chr1_161417055_161417089	AGAGCGCCGAATCCTAACCACTAGACCACCAGGGA	8	35	42824	minus	0.623967	0.623967	0.499253	chr1_161417055_161417089	chr1_161417055_161417089	199.468	0.116438	0.122908	0.876174	0.349252	0.709198	0.359881	-0.106398	0.0323533	-0.249403	0.613973	0.00283455
chr1_161417001_161417137	chr1_161417056_161417074	GAGCGCCGAATCCTAACCA	10	19	24034	minus	0.517193	0.307087	0.287477	chr1_161417056_161417074	chr1_161417056_161417074	112.673	0.00390834	0.12057	0.00108359	0.97374	0.990514	0.0706703	0.204245	0.192634	0.1497	0.0462764	0.0111026
chr1_161417001_161417137	chr1_161417056_161417076	GAGCGCCGAATCCTAACCACT	9	21	39504	minus	0.304462	0.252186	0.264186	chr1_161417056_161417076	chr1_161417056_161417076	189.801	-0.0633308	0.0974922	0.437946	0.508115	0.80061	0.00789919	0.242293	0.393092	-0.078957	0.0251364	0.00985221
chr1_161417001_161417137	chr1_161417056_161417089	GAGCGCCGAATCCTAACCACTAGACCACCAGGGA	8	34	33490	minus	0.440202	0.440202	0.440202	chr1_161417056_161417089	chr1_161417056_161417089	156.812	0.434543	0.143718	8.74767	0.00309998	0.068202	0.244728	0.160361	0.174507	-0.188877	0.0562735	-0.013021
chr1_161417001_161417137	chr1_161417057_161417074	AGCGCCGAATCCTAACCA	10	18	24127	minus	0.517193	0.202153	0.37479	chr1_161417057_161417074	chr1_161417057_161417074	112.736	0.0226467	0.129485	0.031256	0.85967	0.956995	0.615119	-0.0611999	0.166995	0.170008	0.315078	0.00594137
chr1_161417001_161417137	chr1_161417057_161417076	AGCGCCGAATCCTAACCACT	9	20	54879	minus	0.370005	0.338273	0.302532	chr1_161417057_161417076	chr1_161417057_161417076	263.981	-0.109027	0.0939389	1.3755	0.240869	0.610252	0.0386767	0.181537	0.244749	0.103963	0.00434882	0.0121871
chr1_161417001_161417137	chr1_161417057_161417077	AGCGCCGAATCCTAACCACTA	9	21	29542	minus	0.245741	0.245741	0.209395	chr1_161417057_161417077	chr1_161417057_161417077	142.971	-0.0984445	0.101524	0.943779	0.331308	0.691691	0.0096518	0.244983	0.52762	-0.0605799	0.00518465	0.0130336
chr1_161417001_161417137	chr1_161417057_161417089	AGCGCCGAATCCTAACCACTAGACCACCAGGGA	8	33	183344	minus	0.284625	0.284625	0.284625	chr1_161417057_161417089	chr1_161417057_161417089	859.441	0.144183	0.102955	1.86108	0.1725	0.522906	0.469792	-0.0701009	1.1016e-05	-0.43083	0.797099	0.00121785
chr1_161417001_161417137	chr1_161417058_161417076	GCGCCGAATCCTAACCACT	9	19	45133	minus	0.302991	0.331391	0.256595	chr1_161417058_161417076	chr1_161417058_161417076	213.577	-0.024996	0.0997242	0.0639696	0.800328	0.934908	0.675043	0.0392095	0.402333	0.0790888	0.0562749	0.0085557
chr1_161417001_161417137	chr1_161417058_161417077	GCGCCGAATCCTAACCACTA	9	20	23287	minus	0.290317	0.290317	0.28107	chr1_161417058_161417077	chr1_161417058_161417077	111.405	-0.107908	0.0943572	1.31423	0.25163	0.617308	0.500264	0.0594421	0.216888	-0.110148	0.200906	0.00546434
chr1_161417001_161417137	chr1_161417058_161417089	GCGCCGAATCCTAACCACTAGACCACCAGGGA	8	32	159624	minus	0.418443	0.418443	0.348822	chr1_161417058_161417089	chr1_161417058_161417089	743.595	0.00601417	0.14017	0.00164155	0.967682	0.988699	0.460052	-0.0963437	0.469927	-0.0970016	0.831977	0.00135581
chr1_161417001_161417137	chr1_161417059_161417089	CGCCGAATCCTAACCACTAGACCACCAGGGA	8	31	86891	minus	0.631756	0.631756	0.456466	chr1_161417059_161417089	chr1_161417059_161417089	411.063	-0.251919	0.198584	1.29957	0.254292	0.618699	0.354916	-0.175332	0.313252	-0.201436	0.0762656	-0.016781
chr1_161417001_161417137	chr1_161417060_161417077	GCCGAATCCTAACCACTA	12	18	24474	minus	NA	NA	0.383012	chr1_161417060_161417077	chr1_161417060_161417077	113.536	0.0501216	0.148452	0.120029	0.729003	0.90631	0.181688	-0.186051	0.221564	0.172435	0.547776	0.00416423
chr1_161417001_161417137	chr1_161417060_161417089	GCCGAATCCTAACCACTAGACCACCAGGGA	9	30	85633	minus	0.527261	0.527261	0.527261	chr1_161417060_161417089	chr1_161417060_161417089	400.766	-0.174248	0.116934	2.13003	0.144438	0.48531	0.566872	0.0623828	0.431394	-0.088191	0.76449	0.00157306
chr1_161417001_161417137	chr1_161417062_161417089	CGAATCCTAACCACTAGACCACCAGGGA	9	28	27921	minus	0.390341	0.390341	0.390341	chr1_161417062_161417089	chr1_161417062_161417089	130.864	-0.0301175	0.117132	0.0673395	0.795251	0.932344	0.618733	0.0545462	0.0517255	-0.218676	0.489309	0.00367407
chr1_161417001_161417137	chr1_161417063_161417089	GAATCCTAACCACTAGACCACCAGGGA	12	27	102132	minus	0.646157	0.646157	0.646157	chr1_161417063_161417089	chr1_161417063_161417089	479.116	-0.0227427	0.108884	0.0443429	0.833217	0.94752	0.524374	0.0653228	0.191735	-0.135155	0.842823	-0.000980812
chr1_161417001_161417137	chr1_161417064_161417089	AATCCTAACCACTAGACCACCAGGGA	13	26	410544	minus	0.622263	0.622263	0.546598	chr1_161417064_161417089	chr1_161417064_161417089	1905.94	-0.317742	0.155372	4.3652	0.0366801	0.249689	0.431285	0.11447	0.575893	0.0829988	0.197515	0.00926031
chr1_161417001_161417137	chr1_161417065_161417089	ATCCTAACCACTAGACCACCAGGGA	14	25	82652	minus	0.529179	0.529179	0.515772	chr1_161417065_161417089	chr1_161417065_161417089	395.811	-0.291009	0.096334	9.29948	0.00229219	0.0578968	0.58193	0.0499572	0.968946	0.00358631	0.314762	0.00435938
chr1_161417001_161417137	chr1_161417067_161417089	CCTAACCACTAGACCACCAGGGA	18	23	24924	minus	1	1	0.214017	chr1_161417067_161417089	chr1_161417067_161417089	125.368	-0.536764	0.119951	20.6386	5.54675e-06	0.00194705	0.15978	0.158713	0.678353	-0.0474977	0.684455	-0.00220122
chr1_161417001_161417137	chr1_161417072_161417089	CCACTAGACCACCAGGGA	38	18	32352	minus	1	1	0.636627	chr1_161417072_161417089	chr1_161417072_161417089	148.985	-0.118316	0.151788	0.661609	0.415992	0.753865	0.621125	-0.0707597	0.058132	0.278397	0.486681	0.00499242
chr1_161417924_161418116	chr1_161418052_161418073	ACCCCGGTCTCCCGCGTGACAG	14	22	36341	minus	0.555459	0.555459	0.191651	chr1_161418052_161418073	chr1_161418052_161418073	175.385	-0.270436	0.135964	3.88964	0.0485847	0.284133	0.000324817	0.456329	0.0119582	-0.322075	0.00347446	0.0178385
chr1_161417924_161418116	chr1_161418052_161418074	ACCCCGGTCTCCCGCGTGACAGG	13	23	28132	minus	0.555459	0.555459	0.421527	chr1_161418052_161418074	chr1_161418052_161418074	135.998	-0.0627228	0.138479	0.201095	0.653839	0.871944	5.32222e-05	0.522718	0.00415006	-0.374016	0.0304838	0.0135228
chr1_161417924_161418116	chr1_161418062_161418086	CCCGCGTGACAGGCGGGGATACTCA	12	25	10722	minus	1	1	1	chr1_161418062_161418086	chr1_161418062_161418086	53.7974	0.00141068	0.241514	3.88505e-05	0.995027	0.998335	0.101762	0.372591	0.043524	-0.469905	0.296468	0.0121143
chr1_161417924_161418116	chr1_161418073_161418104	GGCGGGGATACTCACCACTATACTAACGAGGA	11	32	13030	minus	0.160448	0.160448	0.160448	chr1_161418073_161418104	chr1_161418073_161418104	61.5618	-0.188196	0.126363	2.14879	0.142682	0.484155	0.000235295	0.436748	0.0111849	-0.30496	0.273668	0.00637543
chr1_161417924_161418116	chr1_161418075_161418104	CGGGGATACTCACCACTATACTAACGAGGA	11	30	17484	minus	1	1	0.160448	chr1_161418075_161418104	chr1_161418075_161418104	84.6194	-0.0426808	0.103269	0.169293	0.680741	0.885721	0.000950394	0.32224	0.0119671	-0.245111	0.000342116	0.0164198
chr1_161417924_161418116	chr1_161418078_161418104	GGATACTCACCACTATACTAACGAGGA	11	27	8922	minus	0.0774888	0.0774888	0.0774888	chr1_161418078_161418104	chr1_161418078_161418104	42.3773	0.0102026	0.106555	0.00891834	0.924762	0.975063	0.806288	-0.024865	0.0329199	-0.215899	0.0375956	0.00988621
chr1_161417924_161418116	chr1_161418079_161418104	GATACTCACCACTATACTAACGAGGA	11	26	12709	minus	0.195564	0.195564	0.195564	chr1_161418079_161418104	chr1_161418079_161418104	60.4991	0.0527041	0.117246	0.199111	0.655439	0.871944	0.153553	-0.158934	0.920301	-0.0111753	0.941941	-0.00038622
chr1_161417924_161418116	chr1_161418080_161418104	ATACTCACCACTATACTAACGAGGA	11	25	37784	minus	0.329427	0.329427	0.329427	chr1_161418080_161418104	chr1_161418080_161418104	192.787	-0.343725	0.117814	8.688	0.00320312	0.0693291	0.192508	0.146545	0.34371	0.10748	0.421215	0.0042158
chr1_161417924_161418116	chr1_161418081_161418104	TACTCACCACTATACTAACGAGGA	11	24	32994	minus	0.41231	0.41231	0.41231	chr1_161418081_161418104	chr1_161418081_161418104	167.997	-0.263603	0.096224	7.6729	0.00560562	0.0917953	0.0535866	0.176839	0.534221	0.0576637	0.368092	0.00392808
chr1_161417924_161418116	chr1_161418082_161418104	ACTCACCACTATACTAACGAGGA	12	23	175888	minus	0.387891	0.387891	0.353586	chr1_161418082_161418104	chr1_161418082_161418104	912.363	-0.334096	0.0934186	12.8894	0.00033045	0.0189481	0.0217036	0.204478	0.966021	0.00382869	0.768727	-0.00123
chr1_161417924_161418116	chr1_161418083_161418104	CTCACCACTATACTAACGAGGA	12	22	42627	minus	0.308702	0.308702	0.308702	chr1_161418083_161418104	chr1_161418083_161418104	221.723	-0.211665	0.0935664	5.06845	0.0243651	0.200125	0.0299989	0.193178	0.0861914	-0.154546	0.150277	0.00586636
chr1_161417924_161418116	chr1_161418084_161418104	TCACCACTATACTAACGAGGA	13	21	28356	minus	0.274487	0.274487	0.239256	chr1_161418084_161418104	chr1_161418084_161418104	143.649	-0.174902	0.0823619	4.52187	0.0334642	0.234065	0.661896	0.0340644	0.935878	0.00632972	0.0766742	0.00662168
chr1_161417924_161418116	chr1_161418085_161418104	CACCACTATACTAACGAGGA	13	20	62030	minus	0.184425	0.184425	0.175903	chr1_161418085_161418104	chr1_161418085_161418104	311.684	-0.184486	0.0675483	7.47213	0.00626612	0.0978677	0.302568	0.0660909	0.306665	0.0660745	0.0861223	0.00524874
chr1_161417924_161418116	chr1_161418087_161418104	CCACTATACTAACGAGGA	16	18	17931	minus	1	1	0.0099193	chr1_161418087_161418104	chr1_161418087_161418104	84.776	0.107176	0.120082	0.755558	0.384722	0.730267	0.149365	-0.168651	0.661822	0.0504524	0.468784	-0.00401808
chr1_161418691_161418833	chr1_161418741_161418760	GTCAGGATGGCCGAGCGGTC	10	20	10527	plus	0.0291528	0.0291528	0.0291528	chr1_161418741_161418760	chr1_161418741_161418760	51.8857	-0.0800282	0.0936424	0.714319	0.398014	0.739147	0.417007	0.0724876	0.338368	-0.0852608	0.0146119	0.0100994
chr1_161418691_161418833	chr1_161418741_161418761	GTCAGGATGGCCGAGCGGTCT	10	21	13537	plus	0.147399	0.147399	0.144598	chr1_161418741_161418761	chr1_161418741_161418761	67.6756	-0.287318	0.0888585	10.4733	0.00121112	0.0395947	0.219591	0.102857	0.200707	-0.108309	0.117447	0.00629945
chr1_161418691_161418833	chr1_161418741_161418762	GTCAGGATGGCCGAGCGGTCTA	10	22	50714	plus	0.11039	0.0497522	0.105456	chr1_161418741_161418762	chr1_161418741_161418762	260.387	-0.0447406	0.0884	0.26086	0.60953	0.853531	0.0424087	0.168032	0.883573	-0.0123134	0.0170836	0.0094945
chr1_161418691_161418833	chr1_161418741_161418764	GTCAGGATGGCCGAGCGGTCTAAG	10	24	34375	plus	0.0987519	0.435681	0.0264978	chr1_161418741_161418764	chr1_161418741_161418764	181.167	0.0897428	0.172893	0.257955	0.611529	0.853531	0.00371702	0.471466	0.0104598	-0.418606	0.0224296	0.0170265
chr1_161418691_161418833	chr1_161418741_161418765	GTCAGGATGGCCGAGCGGTCTAAGG	10	25	40802	plus	0.0273354	1.02933e-05	0.0250451	chr1_161418741_161418765	chr1_161418741_161418765	193.709	-0.14578	0.0979878	2.15229	0.142357	0.484155	0.819643	-0.0209595	0.333265	-0.0899659	0.0184093	0.0104944
chr1_161418691_161418833	chr1_161418741_161418766	GTCAGGATGGCCGAGCGGTCTAAGGC	10	26	35440	plus	0.0753514	0.131707	0.0753514	chr1_161418741_161418766	chr1_161418741_161418766	177.69	0.0712735	0.170946	0.169816	0.680275	0.885721	0.0718034	0.291818	0.00179004	-0.508976	0.0346479	0.0154365
chr1_161418691_161418833	chr1_161418741_161418770	GTCAGGATGGCCGAGCGGTCTAAGGCGCTG	10	30	16938	plus	0.730675	0.730675	0.730675	chr1_161418741_161418770	chr1_161418741_161418770	92.3331	0.506279	0.21726	5.02467	0.0249887	0.201886	0.0249535	0.466339	0.00258489	-0.630782	0.0213419	0.0217956
chr1_161418691_161418833	chr1_161418741_161418771	GTCAGGATGGCCGAGCGGTCTAAGGCGCTGC	9	31	32894	plus	0.730675	0.730675	0.730675	chr1_161418741_161418771	chr1_161418741_161418771	169.476	0.169392	0.185415	0.792077	0.373473	0.725189	0.0069593	0.478848	0.0151656	-0.43013	0.00692146	0.0216899
chr1_161418691_161418833	chr1_161418744_161418764	AGGATGGCCGAGCGGTCTAAG	10	21	156640	plus	0.504191	0.504191	0.504191	chr1_161418744_161418764	chr1_161418744_161418764	804.141	-0.0652589	0.190667	0.118371	0.730808	0.906844	1.6597e-05	0.772422	0.0478219	-0.354887	0.0382647	0.0169104
chr1_161418691_161418833	chr1_161418744_161418766	AGGATGGCCGAGCGGTCTAAGGC	10	23	12188	plus	NA	NA	0.504191	chr1_161418744_161418766	chr1_161418744_161418766	65.3318	0.314708	0.211066	2.19705	0.138275	0.480118	0.053414	0.384815	0.0547005	-0.385582	0.0144092	0.0221394
chr1_161418691_161418833	chr1_161418756_161418772	CGGTCTAAGGCGCTGCG	9	17	8235	plus	NA	NA	Inf	chr1_161418756_161418772	chr1_161418756_161418772	41.6796	-0.126161	0.219054	0.336058	0.562114	0.83094	0.0955982	0.352818	0.69297	-0.0829452	0.419517	0.0080547
chr1_161418691_161418833	chr1_161418773_161418790	TTCAGGTCGCAGTCTCCC	9	18	8499	plus	1	1	1	chr1_161418773_161418790	chr1_161418773_161418790	37.7262	0.311364	0.174679	3.12049	0.0773134	0.361223	0.0769411	0.294666	0.113627	0.26565	0.257442	0.00909373
chr1_161418691_161418833	chr1_161418785_161418805	TCTCCCCTGGAGGCGTGGGTT	9	21	15877	plus	1	1	1	chr1_161418785_161418805	chr1_161418785_161418805	83.3303	0.0852664	0.184066	0.203214	0.652139	0.871471	0.059337	0.331019	0.0695428	-0.320235	0.877282	0.00130566
chr1_161420459_161420556	chr1_161420467_161420483	GCATGGGTGGTTCAGTG	9	17	13586	plus	0.374534	0.374534	0.374534	chr1_161420467_161420483	chr1_161420467_161420483	62.166	0.124843	0.187747	0.483845	0.486686	0.78956	0.033542	-0.379083	0.0202671	0.421911	0.767514	-0.00257134
chr1_161420459_161420556	chr1_161420467_161420484	GCATGGGTGGTTCAGTGG	7	18	33139	plus	0.396071	0.396071	0.396071	chr1_161420467_161420484	chr1_161420467_161420484	158.82	-0.0154056	0.148717	0.0112082	0.915687	0.9729	0.934595	-0.0114596	0.892946	0.0191022	0.558411	0.00396265
chr1_161420459_161420556	chr1_161420467_161420485	GCATGGGTGGTTCAGTGGT	6	19	18476	plus	0.523541	0.523541	0.517632	chr1_161420467_161420485	chr1_161420467_161420485	88.4217	-0.0616443	0.14084	0.20006	0.654672	0.871944	0.60246	0.068352	0.500123	0.0904566	0.406685	0.00526482
chr1_161420459_161420556	chr1_161420467_161420486	GCATGGGTGGTTCAGTGGTA	6	20	55255	plus	0.384495	0.384495	0.384495	chr1_161420467_161420486	chr1_161420467_161420486	276.83	-0.117828	0.145584	0.680935	0.409265	0.750146	0.0010128	0.447183	0.928264	-0.0124678	0.0962124	0.0107193
chr1_161420459_161420556	chr1_161420467_161420487	GCATGGGTGGTTCAGTGGTAG	6	21	27491	plus	0.38241	0.38241	0.381246	chr1_161420467_161420487	chr1_161420467_161420487	136.077	-0.0567963	0.108204	0.279624	0.596948	0.848796	0.958325	0.00527302	0.208702	-0.128955	0.11327	0.00784687
chr1_161420459_161420556	chr1_161420467_161420488	GCATGGGTGGTTCAGTGGTAGA	6	22	26655	plus	0.292305	0.292305	0.214777	chr1_161420467_161420488	chr1_161420467_161420488	127.663	-0.36451	0.12233	9.24523	0.0023611	0.0589038	0.325418	0.112988	0.0149044	0.285469	0.0157665	0.0133812
chr1_161420459_161420556	chr1_161420467_161420489	GCATGGGTGGTTCAGTGGTAGAA	6	23	24491	plus	0.299013	0.299013	0.299013	chr1_161420467_161420489	chr1_161420467_161420489	122.147	-0.196539	0.114519	3.05297	0.0805897	0.370257	0.0894094	0.181717	0.322549	-0.107305	0.0220907	0.0117976
chr1_161420459_161420556	chr1_161420467_161420490	GCATGGGTGGTTCAGTGGTAGAAT	6	24	21197	plus	0.390264	0.390264	0.388621	chr1_161420467_161420490	chr1_161420467_161420490	103.942	-0.165954	0.117812	2.01695	0.155551	0.501825	0.257127	0.125253	0.946683	0.00747319	0.152078	0.00763133
chr1_161420459_161420556	chr1_161420467_161420491	GCATGGGTGGTTCAGTGGTAGAATT	6	25	35953	plus	0.426702	0.426702	0.314498	chr1_161420467_161420491	chr1_161420467_161420491	170.382	-0.167597	0.141926	1.40334	0.236166	0.605137	0.891962	0.0180981	0.120592	0.211026	0.39957	0.00558212
chr1_161420459_161420556	chr1_161420467_161420492	GCATGGGTGGTTCAGTGGTAGAATTC	6	26	18629	plus	0.529493	0.529493	0.496281	chr1_161420467_161420492	chr1_161420467_161420492	88.285	-0.144214	0.127469	1.30462	0.253371	0.617889	0.486209	0.0833829	0.51534	0.0789816	0.377237	0.00513619
chr1_161420459_161420556	chr1_161420467_161420493	GCATGGGTGGTTCAGTGGTAGAATTCT	6	27	9188	plus	0.543522	0.543522	0.496714	chr1_161420467_161420493	chr1_161420467_161420493	42.645	-0.101856	0.147608	0.491557	0.483233	0.78956	0.770046	-0.0404919	0.265967	0.15662	0.442094	0.00528889
chr1_161420459_161420556	chr1_161420467_161420494	GCATGGGTGGTTCAGTGGTAGAATTCTC	5	28	11632	plus	0.548816	0.548816	0.531281	chr1_161420467_161420494	chr1_161420467_161420494	53.924	-0.0505288	0.129924	0.155508	0.693326	0.893471	0.869254	0.0200488	0.200418	0.158316	0.663191	0.00259484
chr1_161420459_161420556	chr1_161420467_161420496	GCATGGGTGGTTCAGTGGTAGAATTCTCGC	5	30	26129	plus	0.674369	0.674369	0.625875	chr1_161420467_161420496	chr1_161420467_161420496	121.779	-0.275163	0.150091	3.20786	0.0732852	0.352671	0.434024	0.109047	0.344517	0.136331	0.704937	0.00263923
chr1_161420459_161420556	chr1_161420467_161420497	GCATGGGTGGTTCAGTGGTAGAATTCTCGCC	5	31	16545	plus	0.674369	0.674369	0.674369	chr1_161420467_161420497	chr1_161420467_161420497	77.0366	-0.297474	0.14642	4.04213	0.0443777	0.272697	0.835106	0.0284174	0.767651	0.0412854	0.0744249	-0.0123175
chr1_161420459_161420556	chr1_161420472_161420489	GGTGGTTCAGTGGTAGAA	29	18	30760	plus	0.557785	0.557785	0.369994	chr1_161420472_161420489	chr1_161420472_161420489	145.044	0.0451021	0.123379	0.138408	0.709869	0.900391	0.329573	-0.114001	0.0267719	0.261561	0.413985	0.00457384
chr1_161420459_161420556	chr1_161420472_161420490	GGTGGTTCAGTGGTAGAAT	29	19	22282	plus	0.557785	0.557785	0.349957	chr1_161420472_161420490	chr1_161420472_161420490	105.931	-0.0831226	0.105102	0.653655	0.418809	0.753865	0.851593	-0.018465	0.0140155	0.246356	0.00886422	0.0124083
chr1_161420459_161420556	chr1_161420485_161420504	TAGAATTCTCGCCTGCCACG	12	20	11967	plus	1	1	1	chr1_161420485_161420504	chr1_161420485_161420504	60.3167	-0.0929714	0.114779	0.65416	0.418629	0.753865	0.000189937	0.403707	0.393083	0.0936883	0.000441792	0.0181103
chr1_161420459_161420556	chr1_161420493_161420518	TCGCCTGCCACGCGGGAGGCCCGGGT	12	26	19408	plus	NA	0.2515	Inf	chr1_161420493_161420518	chr1_161420493_161420518	92.2705	0.164422	0.12285	1.71183	0.190748	0.548659	0.0419314	0.234126	0.277641	-0.126377	0.317512	0.00562327
chr1_161420459_161420556	chr1_161420496_161420518	CCTGCCACGCGGGAGGCCCGGGT	12	23	22892	plus	0.587803	0.539009	0.587803	chr1_161420496_161420518	chr1_161420496_161420518	112.404	0.224225	0.140977	2.4114	0.120454	0.450196	0.467813	0.0962048	0.465644	-0.0974643	0.902761	0.000796124
chr1_161420459_161420556	chr1_161420497_161420518	CTGCCACGCGGGAGGCCCGGGT	12	22	21001	plus	0.531942	0.531942	0.531942	chr1_161420497_161420518	chr1_161420497_161420518	104.966	0.135976	0.124827	1.12399	0.289062	0.653623	0.414784	0.0962305	0.985889	0.00211347	0.718064	0.00205647
chr1_161420459_161420556	chr1_161420498_161420518	TGCCACGCGGGAGGCCCGGGT	12	21	11705	plus	0.430752	0.444221	0.430752	chr1_161420498_161420518	chr1_161420498_161420518	57.0707	0.095959	0.131957	0.511934	0.474303	0.783641	0.0287807	0.272343	0.942547	-0.0090294	0.302113	0.00635894
chr1_161424381_161424517	chr1_161424415_161424437	GAACCCGGGCCGCGGCGGTGAGA	8	23	24137	minus	1	1	1	chr1_161424415_161424437	chr1_161424415_161424437	130.385	0.152082	0.291313	0.241147	0.623379	0.856674	0.825973	0.0603288	0.0597103	-0.539782	0.276987	-0.0152941
chr1_161424381_161424517	chr1_161424433_161424454	TGAGAGCGCCGAATCCTAACCA	10	22	28091	minus	NA	NA	0.11992	chr1_161424433_161424454	chr1_161424433_161424454	138.004	-0.0775919	0.0893806	0.759114	0.383606	0.730267	0.00135669	0.268766	0.0515005	-0.164444	0.00509939	0.0111546
chr1_161424381_161424517	chr1_161424435_161424469	AGAGCGCCGAATCCTAACCACTAGACCACCAGGGA	8	35	42824	minus	0.623967	0.623967	0.499253	chr1_161424435_161424469	chr1_161424435_161424469	199.468	0.116438	0.122908	0.876174	0.349252	0.709198	0.359881	-0.106398	0.0323533	-0.249403	0.613973	0.00283455
chr1_161424381_161424517	chr1_161424436_161424454	GAGCGCCGAATCCTAACCA	10	19	24034	minus	0.517193	0.307087	0.287477	chr1_161424436_161424454	chr1_161424436_161424454	112.673	0.00390834	0.12057	0.00108359	0.97374	0.990514	0.0706703	0.204245	0.192634	0.1497	0.0462764	0.0111026
chr1_161424381_161424517	chr1_161424436_161424456	GAGCGCCGAATCCTAACCACT	9	21	39504	minus	0.304462	0.252186	0.264186	chr1_161424436_161424456	chr1_161424436_161424456	189.801	-0.0633308	0.0974922	0.437946	0.508115	0.80061	0.00789919	0.242293	0.393092	-0.078957	0.0251364	0.00985221
chr1_161424381_161424517	chr1_161424436_161424469	GAGCGCCGAATCCTAACCACTAGACCACCAGGGA	8	34	33490	minus	0.440202	0.440202	0.440202	chr1_161424436_161424469	chr1_161424436_161424469	156.812	0.434543	0.143718	8.74767	0.00309998	0.068202	0.244728	0.160361	0.174507	-0.188877	0.0562735	-0.013021
chr1_161424381_161424517	chr1_161424437_161424454	AGCGCCGAATCCTAACCA	10	18	24127	minus	0.517193	0.202153	0.37479	chr1_161424437_161424454	chr1_161424437_161424454	112.736	0.0226467	0.129485	0.031256	0.85967	0.956995	0.615119	-0.0611999	0.166995	0.170008	0.315078	0.00594137
chr1_161424381_161424517	chr1_161424437_161424456	AGCGCCGAATCCTAACCACT	9	20	54879	minus	0.370005	0.338273	0.302532	chr1_161424437_161424456	chr1_161424437_161424456	263.981	-0.109027	0.0939389	1.3755	0.240869	0.610252	0.0386767	0.181537	0.244749	0.103963	0.00434882	0.0121871
chr1_161424381_161424517	chr1_161424437_161424457	AGCGCCGAATCCTAACCACTA	9	21	29542	minus	0.245741	0.245741	0.209395	chr1_161424437_161424457	chr1_161424437_161424457	142.971	-0.0984445	0.101524	0.943779	0.331308	0.691691	0.0096518	0.244983	0.52762	-0.0605799	0.00518465	0.0130336
chr1_161424381_161424517	chr1_161424437_161424469	AGCGCCGAATCCTAACCACTAGACCACCAGGGA	8	33	183344	minus	0.284625	0.284625	0.284625	chr1_161424437_161424469	chr1_161424437_161424469	859.441	0.144183	0.102955	1.86108	0.1725	0.522906	0.469792	-0.0701009	1.1016e-05	-0.43083	0.797099	0.00121785
chr1_161424381_161424517	chr1_161424438_161424456	GCGCCGAATCCTAACCACT	9	19	45133	minus	0.302991	0.331391	0.256595	chr1_161424438_161424456	chr1_161424438_161424456	213.577	-0.024996	0.0997242	0.0639696	0.800328	0.934908	0.675043	0.0392095	0.402333	0.0790888	0.0562749	0.0085557
chr1_161424381_161424517	chr1_161424438_161424457	GCGCCGAATCCTAACCACTA	9	20	23287	minus	0.290317	0.290317	0.28107	chr1_161424438_161424457	chr1_161424438_161424457	111.405	-0.107908	0.0943572	1.31423	0.25163	0.617308	0.500264	0.0594421	0.216888	-0.110148	0.200906	0.00546434
chr1_161424381_161424517	chr1_161424438_161424469	GCGCCGAATCCTAACCACTAGACCACCAGGGA	8	32	159624	minus	0.418443	0.418443	0.348822	chr1_161424438_161424469	chr1_161424438_161424469	743.595	0.00601417	0.14017	0.00164155	0.967682	0.988699	0.460052	-0.0963437	0.469927	-0.0970016	0.831977	0.00135581
chr1_161424381_161424517	chr1_161424439_161424469	CGCCGAATCCTAACCACTAGACCACCAGGGA	8	31	86891	minus	0.631756	0.631756	0.456466	chr1_161424439_161424469	chr1_161424439_161424469	411.063	-0.251919	0.198584	1.29957	0.254292	0.618699	0.354916	-0.175332	0.313252	-0.201436	0.0762656	-0.016781
chr1_161424381_161424517	chr1_161424440_161424457	GCCGAATCCTAACCACTA	12	18	24474	minus	NA	NA	0.383012	chr1_161424440_161424457	chr1_161424440_161424457	113.536	0.0501216	0.148452	0.120029	0.729003	0.90631	0.181688	-0.186051	0.221564	0.172435	0.547776	0.00416423
chr1_161424381_161424517	chr1_161424440_161424469	GCCGAATCCTAACCACTAGACCACCAGGGA	9	30	85633	minus	0.527261	0.527261	0.527261	chr1_161424440_161424469	chr1_161424440_161424469	400.766	-0.174248	0.116934	2.13003	0.144438	0.48531	0.566872	0.0623828	0.431394	-0.088191	0.76449	0.00157306
chr1_161424381_161424517	chr1_161424442_161424469	CGAATCCTAACCACTAGACCACCAGGGA	9	28	27921	minus	0.390341	0.390341	0.390341	chr1_161424442_161424469	chr1_161424442_161424469	130.864	-0.0301175	0.117132	0.0673395	0.795251	0.932344	0.618733	0.0545462	0.0517255	-0.218676	0.489309	0.00367407
chr1_161424381_161424517	chr1_161424443_161424469	GAATCCTAACCACTAGACCACCAGGGA	12	27	102132	minus	0.646157	0.646157	0.646157	chr1_161424443_161424469	chr1_161424443_161424469	479.116	-0.0227427	0.108884	0.0443429	0.833217	0.94752	0.524374	0.0653228	0.191735	-0.135155	0.842823	-0.000980812
chr1_161424381_161424517	chr1_161424444_161424469	AATCCTAACCACTAGACCACCAGGGA	13	26	410544	minus	0.622263	0.622263	0.546598	chr1_161424444_161424469	chr1_161424444_161424469	1905.94	-0.317742	0.155372	4.3652	0.0366801	0.249689	0.431285	0.11447	0.575893	0.0829988	0.197515	0.00926031
chr1_161424381_161424517	chr1_161424445_161424469	ATCCTAACCACTAGACCACCAGGGA	14	25	82652	minus	0.529179	0.529179	0.515772	chr1_161424445_161424469	chr1_161424445_161424469	395.811	-0.291009	0.096334	9.29948	0.00229219	0.0578968	0.58193	0.0499572	0.968946	0.00358631	0.314762	0.00435938
chr1_161424381_161424517	chr1_161424447_161424469	CCTAACCACTAGACCACCAGGGA	18	23	24924	minus	1	1	0.214017	chr1_161424447_161424469	chr1_161424447_161424469	125.368	-0.536764	0.119951	20.6386	5.54675e-06	0.00194705	0.15978	0.158713	0.678353	-0.0474977	0.684455	-0.00220122
chr1_161424381_161424517	chr1_161424452_161424469	CCACTAGACCACCAGGGA	38	18	32352	minus	1	1	0.636627	chr1_161424452_161424469	chr1_161424452_161424469	148.985	-0.118316	0.151788	0.661609	0.415992	0.753865	0.621125	-0.0707597	0.058132	0.278397	0.486681	0.00499242
chr1_161425394_161425568	chr1_161425433_161425454	ACCCCGGTCTCCCGCGTGACAG	14	22	36341	minus	0.555459	0.555459	0.191651	chr1_161425433_161425454	chr1_161425433_161425454	175.385	-0.270436	0.135964	3.88964	0.0485847	0.284133	0.000324817	0.456329	0.0119582	-0.322075	0.00347446	0.0178385
chr1_161425394_161425568	chr1_161425433_161425455	ACCCCGGTCTCCCGCGTGACAGG	13	23	28132	minus	0.555459	0.555459	0.421527	chr1_161425433_161425455	chr1_161425433_161425455	135.998	-0.0627228	0.138479	0.201095	0.653839	0.871944	5.32222e-05	0.522718	0.00415006	-0.374016	0.0304838	0.0135228
chr1_161425394_161425568	chr1_161425443_161425467	CCCGCGTGACAGGCGGGGATACTCA	12	25	10722	minus	1	1	1	chr1_161425443_161425467	chr1_161425443_161425467	53.7974	0.00141068	0.241514	3.88505e-05	0.995027	0.998335	0.101762	0.372591	0.043524	-0.469905	0.296468	0.0121143
chr1_161425394_161425568	chr1_161425454_161425485	GGCGGGGATACTCACCACTATACTAACGAGGA	11	32	13030	minus	0.160448	0.160448	0.160448	chr1_161425454_161425485	chr1_161425454_161425485	61.5618	-0.188196	0.126363	2.14879	0.142682	0.484155	0.000235295	0.436748	0.0111849	-0.30496	0.273668	0.00637543
chr1_161425394_161425568	chr1_161425456_161425485	CGGGGATACTCACCACTATACTAACGAGGA	11	30	17484	minus	1	1	0.160448	chr1_161425456_161425485	chr1_161425456_161425485	84.6194	-0.0426808	0.103269	0.169293	0.680741	0.885721	0.000950394	0.32224	0.0119671	-0.245111	0.000342116	0.0164198
chr1_161425394_161425568	chr1_161425459_161425485	GGATACTCACCACTATACTAACGAGGA	11	27	8922	minus	0.0774888	0.0774888	0.0774888	chr1_161425459_161425485	chr1_161425459_161425485	42.3773	0.0102026	0.106555	0.00891834	0.924762	0.975063	0.806288	-0.024865	0.0329199	-0.215899	0.0375956	0.00988621
chr1_161425394_161425568	chr1_161425460_161425485	GATACTCACCACTATACTAACGAGGA	11	26	12709	minus	0.195564	0.195564	0.195564	chr1_161425460_161425485	chr1_161425460_161425485	60.4991	0.0527041	0.117246	0.199111	0.655439	0.871944	0.153553	-0.158934	0.920301	-0.0111753	0.941941	-0.00038622
chr1_161425394_161425568	chr1_161425461_161425485	ATACTCACCACTATACTAACGAGGA	11	25	37784	minus	0.329427	0.329427	0.329427	chr1_161425461_161425485	chr1_161425461_161425485	192.787	-0.343725	0.117814	8.688	0.00320312	0.0693291	0.192508	0.146545	0.34371	0.10748	0.421215	0.0042158
chr1_161425394_161425568	chr1_161425462_161425485	TACTCACCACTATACTAACGAGGA	11	24	32994	minus	0.41231	0.41231	0.41231	chr1_161425462_161425485	chr1_161425462_161425485	167.997	-0.263603	0.096224	7.6729	0.00560562	0.0917953	0.0535866	0.176839	0.534221	0.0576637	0.368092	0.00392808
chr1_161425394_161425568	chr1_161425463_161425485	ACTCACCACTATACTAACGAGGA	12	23	175888	minus	0.387891	0.387891	0.353586	chr1_161425463_161425485	chr1_161425463_161425485	912.363	-0.334096	0.0934186	12.8894	0.00033045	0.0189481	0.0217036	0.204478	0.966021	0.00382869	0.768727	-0.00123
chr1_161425394_161425568	chr1_161425464_161425485	CTCACCACTATACTAACGAGGA	12	22	42627	minus	0.308702	0.308702	0.308702	chr1_161425464_161425485	chr1_161425464_161425485	221.723	-0.211665	0.0935664	5.06845	0.0243651	0.200125	0.0299989	0.193178	0.0861914	-0.154546	0.150277	0.00586636
chr1_161425394_161425568	chr1_161425465_161425485	TCACCACTATACTAACGAGGA	13	21	28356	minus	0.274487	0.274487	0.239256	chr1_161425465_161425485	chr1_161425465_161425485	143.649	-0.174902	0.0823619	4.52187	0.0334642	0.234065	0.661896	0.0340644	0.935878	0.00632972	0.0766742	0.00662168
chr1_161425394_161425568	chr1_161425466_161425485	CACCACTATACTAACGAGGA	13	20	62030	minus	0.184425	0.184425	0.175903	chr1_161425466_161425485	chr1_161425466_161425485	311.684	-0.184486	0.0675483	7.47213	0.00626612	0.0978677	0.302568	0.0660909	0.306665	0.0660745	0.0861223	0.00524874
chr1_161425394_161425568	chr1_161425468_161425485	CCACTATACTAACGAGGA	16	18	17931	minus	1	1	0.0099193	chr1_161425468_161425485	chr1_161425468_161425485	84.776	0.107176	0.120082	0.755558	0.384722	0.730267	0.149365	-0.168651	0.661822	0.0504524	0.468784	-0.00401808
chr1_161426092_161426235	chr1_161426122_161426141	GTCAGGATGGCCGAGCGGTC	10	20	10527	plus	0.0291528	0.0291528	0.0291528	chr1_161426122_161426141	chr1_161426122_161426141	51.8857	-0.0800282	0.0936424	0.714319	0.398014	0.739147	0.417007	0.0724876	0.338368	-0.0852608	0.0146119	0.0100994
chr1_161426092_161426235	chr1_161426122_161426142	GTCAGGATGGCCGAGCGGTCT	10	21	13537	plus	0.147399	0.147399	0.144598	chr1_161426122_161426142	chr1_161426122_161426142	67.6756	-0.287318	0.0888585	10.4733	0.00121112	0.0395947	0.219591	0.102857	0.200707	-0.108309	0.117447	0.00629945
chr1_161426092_161426235	chr1_161426122_161426143	GTCAGGATGGCCGAGCGGTCTA	10	22	50714	plus	0.11039	0.0497522	0.105456	chr1_161426122_161426143	chr1_161426122_161426143	260.387	-0.0447406	0.0884	0.26086	0.60953	0.853531	0.0424087	0.168032	0.883573	-0.0123134	0.0170836	0.0094945
chr1_161426092_161426235	chr1_161426122_161426145	GTCAGGATGGCCGAGCGGTCTAAG	10	24	34375	plus	0.0987519	0.435681	0.0264978	chr1_161426122_161426145	chr1_161426122_161426145	181.167	0.0897428	0.172893	0.257955	0.611529	0.853531	0.00371702	0.471466	0.0104598	-0.418606	0.0224296	0.0170265
chr1_161426092_161426235	chr1_161426122_161426146	GTCAGGATGGCCGAGCGGTCTAAGG	10	25	40802	plus	0.0273354	1.02933e-05	0.0250451	chr1_161426122_161426146	chr1_161426122_161426146	193.709	-0.14578	0.0979878	2.15229	0.142357	0.484155	0.819643	-0.0209595	0.333265	-0.0899659	0.0184093	0.0104944
chr1_161426092_161426235	chr1_161426122_161426147	GTCAGGATGGCCGAGCGGTCTAAGGC	10	26	35440	plus	0.0753514	0.131707	0.0753514	chr1_161426122_161426147	chr1_161426122_161426147	177.69	0.0712735	0.170946	0.169816	0.680275	0.885721	0.0718034	0.291818	0.00179004	-0.508976	0.0346479	0.0154365
chr1_161426092_161426235	chr1_161426122_161426151	GTCAGGATGGCCGAGCGGTCTAAGGCGCTG	10	30	16938	plus	0.730675	0.730675	0.730675	chr1_161426122_161426151	chr1_161426122_161426151	92.3331	0.506279	0.21726	5.02467	0.0249887	0.201886	0.0249535	0.466339	0.00258489	-0.630782	0.0213419	0.0217956
chr1_161426092_161426235	chr1_161426122_161426152	GTCAGGATGGCCGAGCGGTCTAAGGCGCTGC	9	31	32894	plus	0.730675	0.730675	0.730675	chr1_161426122_161426152	chr1_161426122_161426152	169.476	0.169392	0.185415	0.792077	0.373473	0.725189	0.0069593	0.478848	0.0151656	-0.43013	0.00692146	0.0216899
chr1_161426092_161426235	chr1_161426125_161426145	AGGATGGCCGAGCGGTCTAAG	10	21	156640	plus	0.504191	0.504191	0.504191	chr1_161426125_161426145	chr1_161426125_161426145	804.141	-0.0652589	0.190667	0.118371	0.730808	0.906844	1.6597e-05	0.772422	0.0478219	-0.354887	0.0382647	0.0169104
chr1_161426092_161426235	chr1_161426125_161426147	AGGATGGCCGAGCGGTCTAAGGC	10	23	12188	plus	NA	NA	0.504191	chr1_161426125_161426147	chr1_161426125_161426147	65.3318	0.314708	0.211066	2.19705	0.138275	0.480118	0.053414	0.384815	0.0547005	-0.385582	0.0144092	0.0221394
chr1_161426092_161426235	chr1_161426137_161426153	CGGTCTAAGGCGCTGCG	9	17	8235	plus	NA	NA	Inf	chr1_161426137_161426153	chr1_161426137_161426153	41.6796	-0.126161	0.219054	0.336058	0.562114	0.83094	0.0955982	0.352818	0.69297	-0.0829452	0.419517	0.0080547
chr1_161426092_161426235	chr1_161426154_161426171	TTCAGGTCGCAGTCTCCC	9	18	8499	plus	1	1	1	chr1_161426154_161426171	chr1_161426154_161426171	37.7262	0.311364	0.174679	3.12049	0.0773134	0.361223	0.0769411	0.294666	0.113627	0.26565	0.257442	0.00909373
chr1_161426092_161426235	chr1_161426166_161426186	TCTCCCCTGGAGGCGTGGGTT	9	21	15877	plus	1	1	1	chr1_161426166_161426186	chr1_161426166_161426186	83.3303	0.0852664	0.184066	0.203214	0.652139	0.871471	0.059337	0.331019	0.0695428	-0.320235	0.877282	0.00130566
chr1_161427880_161427987	chr1_161427898_161427914	GCATGGGTGGTTCAGTG	9	17	13586	plus	0.374534	0.374534	0.374534	chr1_161427898_161427914	chr1_161427898_161427914	62.166	0.124843	0.187747	0.483845	0.486686	0.78956	0.033542	-0.379083	0.0202671	0.421911	0.767514	-0.00257134
chr1_161427880_161427987	chr1_161427898_161427915	GCATGGGTGGTTCAGTGG	7	18	33139	plus	0.396071	0.396071	0.396071	chr1_161427898_161427915	chr1_161427898_161427915	158.82	-0.0154056	0.148717	0.0112082	0.915687	0.9729	0.934595	-0.0114596	0.892946	0.0191022	0.558411	0.00396265
chr1_161427880_161427987	chr1_161427898_161427916	GCATGGGTGGTTCAGTGGT	6	19	18476	plus	0.523541	0.523541	0.517632	chr1_161427898_161427916	chr1_161427898_161427916	88.4217	-0.0616443	0.14084	0.20006	0.654672	0.871944	0.60246	0.068352	0.500123	0.0904566	0.406685	0.00526482
chr1_161427880_161427987	chr1_161427898_161427917	GCATGGGTGGTTCAGTGGTA	6	20	55255	plus	0.384495	0.384495	0.384495	chr1_161427898_161427917	chr1_161427898_161427917	276.83	-0.117828	0.145584	0.680935	0.409265	0.750146	0.0010128	0.447183	0.928264	-0.0124678	0.0962124	0.0107193
chr1_161427880_161427987	chr1_161427898_161427918	GCATGGGTGGTTCAGTGGTAG	6	21	27491	plus	0.38241	0.38241	0.381246	chr1_161427898_161427918	chr1_161427898_161427918	136.077	-0.0567963	0.108204	0.279624	0.596948	0.848796	0.958325	0.00527302	0.208702	-0.128955	0.11327	0.00784687
chr1_161427880_161427987	chr1_161427898_161427919	GCATGGGTGGTTCAGTGGTAGA	6	22	26655	plus	0.292305	0.292305	0.214777	chr1_161427898_161427919	chr1_161427898_161427919	127.663	-0.36451	0.12233	9.24523	0.0023611	0.0589038	0.325418	0.112988	0.0149044	0.285469	0.0157665	0.0133812
chr1_161427880_161427987	chr1_161427898_161427920	GCATGGGTGGTTCAGTGGTAGAA	6	23	24491	plus	0.299013	0.299013	0.299013	chr1_161427898_161427920	chr1_161427898_161427920	122.147	-0.196539	0.114519	3.05297	0.0805897	0.370257	0.0894094	0.181717	0.322549	-0.107305	0.0220907	0.0117976
chr1_161427880_161427987	chr1_161427898_161427921	GCATGGGTGGTTCAGTGGTAGAAT	6	24	21197	plus	0.390264	0.390264	0.388621	chr1_161427898_161427921	chr1_161427898_161427921	103.942	-0.165954	0.117812	2.01695	0.155551	0.501825	0.257127	0.125253	0.946683	0.00747319	0.152078	0.00763133
chr1_161427880_161427987	chr1_161427898_161427922	GCATGGGTGGTTCAGTGGTAGAATT	6	25	35953	plus	0.426702	0.426702	0.314498	chr1_161427898_161427922	chr1_161427898_161427922	170.382	-0.167597	0.141926	1.40334	0.236166	0.605137	0.891962	0.0180981	0.120592	0.211026	0.39957	0.00558212
chr1_161427880_161427987	chr1_161427898_161427923	GCATGGGTGGTTCAGTGGTAGAATTC	6	26	18629	plus	0.529493	0.529493	0.496281	chr1_161427898_161427923	chr1_161427898_161427923	88.285	-0.144214	0.127469	1.30462	0.253371	0.617889	0.486209	0.0833829	0.51534	0.0789816	0.377237	0.00513619
chr1_161427880_161427987	chr1_161427898_161427924	GCATGGGTGGTTCAGTGGTAGAATTCT	6	27	9188	plus	0.543522	0.543522	0.496714	chr1_161427898_161427924	chr1_161427898_161427924	42.645	-0.101856	0.147608	0.491557	0.483233	0.78956	0.770046	-0.0404919	0.265967	0.15662	0.442094	0.00528889
chr1_161427880_161427987	chr1_161427898_161427925	GCATGGGTGGTTCAGTGGTAGAATTCTC	5	28	11632	plus	0.548816	0.548816	0.531281	chr1_161427898_161427925	chr1_161427898_161427925	53.924	-0.0505288	0.129924	0.155508	0.693326	0.893471	0.869254	0.0200488	0.200418	0.158316	0.663191	0.00259484
chr1_161427880_161427987	chr1_161427898_161427927	GCATGGGTGGTTCAGTGGTAGAATTCTCGC	5	30	26129	plus	0.674369	0.674369	0.625875	chr1_161427898_161427927	chr1_161427898_161427927	121.779	-0.275163	0.150091	3.20786	0.0732852	0.352671	0.434024	0.109047	0.344517	0.136331	0.704937	0.00263923
chr1_161427880_161427987	chr1_161427898_161427928	GCATGGGTGGTTCAGTGGTAGAATTCTCGCC	5	31	16545	plus	0.674369	0.674369	0.674369	chr1_161427898_161427928	chr1_161427898_161427928	77.0366	-0.297474	0.14642	4.04213	0.0443777	0.272697	0.835106	0.0284174	0.767651	0.0412854	0.0744249	-0.0123175
chr1_161427880_161427987	chr1_161427903_161427920	GGTGGTTCAGTGGTAGAA	29	18	30760	plus	0.557785	0.557785	0.369994	chr1_161427903_161427920	chr1_161427903_161427920	145.044	0.0451021	0.123379	0.138408	0.709869	0.900391	0.329573	-0.114001	0.0267719	0.261561	0.413985	0.00457384
chr1_161427880_161427987	chr1_161427903_161427921	GGTGGTTCAGTGGTAGAAT	29	19	22282	plus	0.557785	0.557785	0.349957	chr1_161427903_161427921	chr1_161427903_161427921	105.931	-0.0831226	0.105102	0.653655	0.418809	0.753865	0.851593	-0.018465	0.0140155	0.246356	0.00886422	0.0124083
chr1_161427880_161427987	chr1_161427916_161427935	TAGAATTCTCGCCTGCCACG	12	20	11967	plus	1	1	1	chr1_161427916_161427935	chr1_161427916_161427935	60.3167	-0.0929714	0.114779	0.65416	0.418629	0.753865	0.000189937	0.403707	0.393083	0.0936883	0.000441792	0.0181103
chr1_161427880_161427987	chr1_161427924_161427949	TCGCCTGCCACGCGGGAGGCCCGGGT	12	26	19408	plus	NA	0.2515	Inf	chr1_161427924_161427949	chr1_161427924_161427949	92.2705	0.164422	0.12285	1.71183	0.190748	0.548659	0.0419314	0.234126	0.277641	-0.126377	0.317512	0.00562327
chr1_161427880_161427987	chr1_161427927_161427949	CCTGCCACGCGGGAGGCCCGGGT	12	23	22892	plus	0.587803	0.539009	0.587803	chr1_161427927_161427949	chr1_161427927_161427949	112.404	0.224225	0.140977	2.4114	0.120454	0.450196	0.467813	0.0962048	0.465644	-0.0974643	0.902761	0.000796124
chr1_161427880_161427987	chr1_161427928_161427949	CTGCCACGCGGGAGGCCCGGGT	12	22	21001	plus	0.531942	0.531942	0.531942	chr1_161427928_161427949	chr1_161427928_161427949	104.966	0.135976	0.124827	1.12399	0.289062	0.653623	0.414784	0.0962305	0.985889	0.00211347	0.718064	0.00205647
chr1_161427880_161427987	chr1_161427929_161427949	TGCCACGCGGGAGGCCCGGGT	12	21	11705	plus	0.430752	0.444221	0.430752	chr1_161427929_161427949	chr1_161427929_161427949	57.0707	0.095959	0.131957	0.511934	0.474303	0.783641	0.0287807	0.272343	0.942547	-0.0090294	0.302113	0.00635894
chr1_161431792_161431911	chr1_161431826_161431848	GAACCCGGGCCGCGGCGGTGAGA	8	23	24137	minus	1	1	1	chr1_161431826_161431848	chr1_161431826_161431848	130.385	0.152082	0.291313	0.241147	0.623379	0.856674	0.825973	0.0603288	0.0597103	-0.539782	0.276987	-0.0152941
chr1_161431792_161431911	chr1_161431844_161431865	TGAGAGCGCCGAATCCTAACCA	10	22	28091	minus	NA	NA	0.11992	chr1_161431844_161431865	chr1_161431844_161431865	138.004	-0.0775919	0.0893806	0.759114	0.383606	0.730267	0.00135669	0.268766	0.0515005	-0.164444	0.00509939	0.0111546
chr1_161431792_161431911	chr1_161431846_161431880	AGAGCGCCGAATCCTAACCACTAGACCACCAGGGA	8	35	42824	minus	0.623967	0.623967	0.499253	chr1_161431846_161431880	chr1_161431846_161431880	199.468	0.116438	0.122908	0.876174	0.349252	0.709198	0.359881	-0.106398	0.0323533	-0.249403	0.613973	0.00283455
chr1_161431792_161431911	chr1_161431847_161431865	GAGCGCCGAATCCTAACCA	10	19	24034	minus	0.517193	0.307087	0.287477	chr1_161431847_161431865	chr1_161431847_161431865	112.673	0.00390834	0.12057	0.00108359	0.97374	0.990514	0.0706703	0.204245	0.192634	0.1497	0.0462764	0.0111026
chr1_161431792_161431911	chr1_161431847_161431867	GAGCGCCGAATCCTAACCACT	9	21	39504	minus	0.304462	0.252186	0.264186	chr1_161431847_161431867	chr1_161431847_161431867	189.801	-0.0633308	0.0974922	0.437946	0.508115	0.80061	0.00789919	0.242293	0.393092	-0.078957	0.0251364	0.00985221
chr1_161431792_161431911	chr1_161431847_161431880	GAGCGCCGAATCCTAACCACTAGACCACCAGGGA	8	34	33490	minus	0.440202	0.440202	0.440202	chr1_161431847_161431880	chr1_161431847_161431880	156.812	0.434543	0.143718	8.74767	0.00309998	0.068202	0.244728	0.160361	0.174507	-0.188877	0.0562735	-0.013021
chr1_161431792_161431911	chr1_161431848_161431865	AGCGCCGAATCCTAACCA	10	18	24127	minus	0.517193	0.202153	0.37479	chr1_161431848_161431865	chr1_161431848_161431865	112.736	0.0226467	0.129485	0.031256	0.85967	0.956995	0.615119	-0.0611999	0.166995	0.170008	0.315078	0.00594137
chr1_161431792_161431911	chr1_161431848_161431867	AGCGCCGAATCCTAACCACT	9	20	54879	minus	0.370005	0.338273	0.302532	chr1_161431848_161431867	chr1_161431848_161431867	263.981	-0.109027	0.0939389	1.3755	0.240869	0.610252	0.0386767	0.181537	0.244749	0.103963	0.00434882	0.0121871
chr1_161431792_161431911	chr1_161431848_161431868	AGCGCCGAATCCTAACCACTA	9	21	29542	minus	0.245741	0.245741	0.209395	chr1_161431848_161431868	chr1_161431848_161431868	142.971	-0.0984445	0.101524	0.943779	0.331308	0.691691	0.0096518	0.244983	0.52762	-0.0605799	0.00518465	0.0130336
chr1_161431792_161431911	chr1_161431848_161431880	AGCGCCGAATCCTAACCACTAGACCACCAGGGA	8	33	183344	minus	0.284625	0.284625	0.284625	chr1_161431848_161431880	chr1_161431848_161431880	859.441	0.144183	0.102955	1.86108	0.1725	0.522906	0.469792	-0.0701009	1.1016e-05	-0.43083	0.797099	0.00121785
chr1_161431792_161431911	chr1_161431849_161431867	GCGCCGAATCCTAACCACT	9	19	45133	minus	0.302991	0.331391	0.256595	chr1_161431849_161431867	chr1_161431849_161431867	213.577	-0.024996	0.0997242	0.0639696	0.800328	0.934908	0.675043	0.0392095	0.402333	0.0790888	0.0562749	0.0085557
chr1_161431792_161431911	chr1_161431849_161431868	GCGCCGAATCCTAACCACTA	9	20	23287	minus	0.290317	0.290317	0.28107	chr1_161431849_161431868	chr1_161431849_161431868	111.405	-0.107908	0.0943572	1.31423	0.25163	0.617308	0.500264	0.0594421	0.216888	-0.110148	0.200906	0.00546434
chr1_161431792_161431911	chr1_161431849_161431880	GCGCCGAATCCTAACCACTAGACCACCAGGGA	8	32	159624	minus	0.418443	0.418443	0.348822	chr1_161431849_161431880	chr1_161431849_161431880	743.595	0.00601417	0.14017	0.00164155	0.967682	0.988699	0.460052	-0.0963437	0.469927	-0.0970016	0.831977	0.00135581
chr1_161431792_161431911	chr1_161431850_161431880	CGCCGAATCCTAACCACTAGACCACCAGGGA	8	31	86891	minus	0.631756	0.631756	0.456466	chr1_161431850_161431880	chr1_161431850_161431880	411.063	-0.251919	0.198584	1.29957	0.254292	0.618699	0.354916	-0.175332	0.313252	-0.201436	0.0762656	-0.016781
chr1_161431792_161431911	chr1_161431851_161431868	GCCGAATCCTAACCACTA	12	18	24474	minus	NA	NA	0.383012	chr1_161431851_161431868	chr1_161431851_161431868	113.536	0.0501216	0.148452	0.120029	0.729003	0.90631	0.181688	-0.186051	0.221564	0.172435	0.547776	0.00416423
chr1_161431792_161431911	chr1_161431851_161431880	GCCGAATCCTAACCACTAGACCACCAGGGA	9	30	85633	minus	0.527261	0.527261	0.527261	chr1_161431851_161431880	chr1_161431851_161431880	400.766	-0.174248	0.116934	2.13003	0.144438	0.48531	0.566872	0.0623828	0.431394	-0.088191	0.76449	0.00157306
chr1_161431792_161431911	chr1_161431853_161431880	CGAATCCTAACCACTAGACCACCAGGGA	9	28	27921	minus	0.390341	0.390341	0.390341	chr1_161431853_161431880	chr1_161431853_161431880	130.864	-0.0301175	0.117132	0.0673395	0.795251	0.932344	0.618733	0.0545462	0.0517255	-0.218676	0.489309	0.00367407
chr1_161431792_161431911	chr1_161431854_161431880	GAATCCTAACCACTAGACCACCAGGGA	12	27	102132	minus	0.646157	0.646157	0.646157	chr1_161431854_161431880	chr1_161431854_161431880	479.116	-0.0227427	0.108884	0.0443429	0.833217	0.94752	0.524374	0.0653228	0.191735	-0.135155	0.842823	-0.000980812
chr1_161431792_161431911	chr1_161431855_161431880	AATCCTAACCACTAGACCACCAGGGA	13	26	410544	minus	0.622263	0.622263	0.546598	chr1_161431855_161431880	chr1_161431855_161431880	1905.94	-0.317742	0.155372	4.3652	0.0366801	0.249689	0.431285	0.11447	0.575893	0.0829988	0.197515	0.00926031
chr1_161431792_161431911	chr1_161431856_161431880	ATCCTAACCACTAGACCACCAGGGA	14	25	82652	minus	0.529179	0.529179	0.515772	chr1_161431856_161431880	chr1_161431856_161431880	395.811	-0.291009	0.096334	9.29948	0.00229219	0.0578968	0.58193	0.0499572	0.968946	0.00358631	0.314762	0.00435938
chr1_161431792_161431911	chr1_161431858_161431880	CCTAACCACTAGACCACCAGGGA	18	23	24924	minus	1	1	0.214017	chr1_161431858_161431880	chr1_161431858_161431880	125.368	-0.536764	0.119951	20.6386	5.54675e-06	0.00194705	0.15978	0.158713	0.678353	-0.0474977	0.684455	-0.00220122
chr1_161431792_161431911	chr1_161431863_161431880	CCACTAGACCACCAGGGA	38	18	32352	minus	1	1	0.636627	chr1_161431863_161431880	chr1_161431863_161431880	148.985	-0.118316	0.151788	0.661609	0.415992	0.753865	0.621125	-0.0707597	0.058132	0.278397	0.486681	0.00499242
chr1_161432804_161432908	chr1_161432843_161432864	ACCCCGGTCTCCCGCGTGACAG	14	22	36341	minus	0.555459	0.555459	0.191651	chr1_161432843_161432864	chr1_161432843_161432864	175.385	-0.270436	0.135964	3.88964	0.0485847	0.284133	0.000324817	0.456329	0.0119582	-0.322075	0.00347446	0.0178385
chr1_161432804_161432908	chr1_161432843_161432865	ACCCCGGTCTCCCGCGTGACAGG	13	23	28132	minus	0.555459	0.555459	0.421527	chr1_161432843_161432865	chr1_161432843_161432865	135.998	-0.0627228	0.138479	0.201095	0.653839	0.871944	5.32222e-05	0.522718	0.00415006	-0.374016	0.0304838	0.0135228
chr1_161432804_161432908	chr1_161432853_161432877	CCCGCGTGACAGGCGGGGATACTCA	12	25	10722	minus	1	1	1	chr1_161432853_161432877	chr1_161432853_161432877	53.7974	0.00141068	0.241514	3.88505e-05	0.995027	0.998335	0.101762	0.372591	0.043524	-0.469905	0.296468	0.0121143
chr1_161432804_161432908	chr1_161432864_161432895	GGCGGGGATACTCACCACTATACTAACGAGGA	11	32	13030	minus	0.160448	0.160448	0.160448	chr1_161432864_161432895	chr1_161432864_161432895	61.5618	-0.188196	0.126363	2.14879	0.142682	0.484155	0.000235295	0.436748	0.0111849	-0.30496	0.273668	0.00637543
chr1_161432804_161432908	chr1_161432866_161432895	CGGGGATACTCACCACTATACTAACGAGGA	11	30	17484	minus	1	1	0.160448	chr1_161432866_161432895	chr1_161432866_161432895	84.6194	-0.0426808	0.103269	0.169293	0.680741	0.885721	0.000950394	0.32224	0.0119671	-0.245111	0.000342116	0.0164198
chr1_161432804_161432908	chr1_161432869_161432895	GGATACTCACCACTATACTAACGAGGA	11	27	8922	minus	0.0774888	0.0774888	0.0774888	chr1_161432869_161432895	chr1_161432869_161432895	42.3773	0.0102026	0.106555	0.00891834	0.924762	0.975063	0.806288	-0.024865	0.0329199	-0.215899	0.0375956	0.00988621
chr1_161432804_161432908	chr1_161432870_161432895	GATACTCACCACTATACTAACGAGGA	11	26	12709	minus	0.195564	0.195564	0.195564	chr1_161432870_161432895	chr1_161432870_161432895	60.4991	0.0527041	0.117246	0.199111	0.655439	0.871944	0.153553	-0.158934	0.920301	-0.0111753	0.941941	-0.00038622
chr1_161432804_161432908	chr1_161432871_161432895	ATACTCACCACTATACTAACGAGGA	11	25	37784	minus	0.329427	0.329427	0.329427	chr1_161432871_161432895	chr1_161432871_161432895	192.787	-0.343725	0.117814	8.688	0.00320312	0.0693291	0.192508	0.146545	0.34371	0.10748	0.421215	0.0042158
chr1_161432804_161432908	chr1_161432872_161432895	TACTCACCACTATACTAACGAGGA	11	24	32994	minus	0.41231	0.41231	0.41231	chr1_161432872_161432895	chr1_161432872_161432895	167.997	-0.263603	0.096224	7.6729	0.00560562	0.0917953	0.0535866	0.176839	0.534221	0.0576637	0.368092	0.00392808
chr1_161432804_161432908	chr1_161432873_161432895	ACTCACCACTATACTAACGAGGA	12	23	175888	minus	0.387891	0.387891	0.353586	chr1_161432873_161432895	chr1_161432873_161432895	912.363	-0.334096	0.0934186	12.8894	0.00033045	0.0189481	0.0217036	0.204478	0.966021	0.00382869	0.768727	-0.00123
chr1_161432804_161432908	chr1_161432874_161432895	CTCACCACTATACTAACGAGGA	12	22	42627	minus	0.308702	0.308702	0.308702	chr1_161432874_161432895	chr1_161432874_161432895	221.723	-0.211665	0.0935664	5.06845	0.0243651	0.200125	0.0299989	0.193178	0.0861914	-0.154546	0.150277	0.00586636
chr1_161432804_161432908	chr1_161432875_161432895	TCACCACTATACTAACGAGGA	13	21	28356	minus	0.274487	0.274487	0.239256	chr1_161432875_161432895	chr1_161432875_161432895	143.649	-0.174902	0.0823619	4.52187	0.0334642	0.234065	0.661896	0.0340644	0.935878	0.00632972	0.0766742	0.00662168
chr1_161432804_161432908	chr1_161432876_161432895	CACCACTATACTAACGAGGA	13	20	62030	minus	0.184425	0.184425	0.175903	chr1_161432876_161432895	chr1_161432876_161432895	311.684	-0.184486	0.0675483	7.47213	0.00626612	0.0978677	0.302568	0.0660909	0.306665	0.0660745	0.0861223	0.00524874
chr1_161432804_161432908	chr1_161432878_161432895	CCACTATACTAACGAGGA	16	18	17931	minus	1	1	0.0099193	chr1_161432878_161432895	chr1_161432878_161432895	84.776	0.107176	0.120082	0.755558	0.384722	0.730267	0.149365	-0.168651	0.661822	0.0504524	0.468784	-0.00401808
chr1_161433530_161433618	chr1_161433532_161433551	GTCAGGATGGCCGAGCGGTC	10	20	10527	plus	0.0291528	0.0291528	0.0291528	chr1_161433532_161433551	chr1_161433532_161433551	51.8857	-0.0800282	0.0936424	0.714319	0.398014	0.739147	0.417007	0.0724876	0.338368	-0.0852608	0.0146119	0.0100994
chr1_161433530_161433618	chr1_161433532_161433552	GTCAGGATGGCCGAGCGGTCT	10	21	13537	plus	0.147399	0.147399	0.144598	chr1_161433532_161433552	chr1_161433532_161433552	67.6756	-0.287318	0.0888585	10.4733	0.00121112	0.0395947	0.219591	0.102857	0.200707	-0.108309	0.117447	0.00629945
chr1_161433530_161433618	chr1_161433532_161433553	GTCAGGATGGCCGAGCGGTCTA	10	22	50714	plus	0.11039	0.0497522	0.105456	chr1_161433532_161433553	chr1_161433532_161433553	260.387	-0.0447406	0.0884	0.26086	0.60953	0.853531	0.0424087	0.168032	0.883573	-0.0123134	0.0170836	0.0094945
chr1_161433530_161433618	chr1_161433532_161433555	GTCAGGATGGCCGAGCGGTCTAAG	10	24	34375	plus	0.0987519	0.435681	0.0264978	chr1_161433532_161433555	chr1_161433532_161433555	181.167	0.0897428	0.172893	0.257955	0.611529	0.853531	0.00371702	0.471466	0.0104598	-0.418606	0.0224296	0.0170265
chr1_161433530_161433618	chr1_161433532_161433556	GTCAGGATGGCCGAGCGGTCTAAGG	10	25	40802	plus	0.0273354	1.02933e-05	0.0250451	chr1_161433532_161433556	chr1_161433532_161433556	193.709	-0.14578	0.0979878	2.15229	0.142357	0.484155	0.819643	-0.0209595	0.333265	-0.0899659	0.0184093	0.0104944
chr1_161433530_161433618	chr1_161433532_161433557	GTCAGGATGGCCGAGCGGTCTAAGGC	10	26	35440	plus	0.0753514	0.131707	0.0753514	chr1_161433532_161433557	chr1_161433532_161433557	177.69	0.0712735	0.170946	0.169816	0.680275	0.885721	0.0718034	0.291818	0.00179004	-0.508976	0.0346479	0.0154365
chr1_161433530_161433618	chr1_161433532_161433561	GTCAGGATGGCCGAGCGGTCTAAGGCGCTG	10	30	16938	plus	0.730675	0.730675	0.730675	chr1_161433532_161433561	chr1_161433532_161433561	92.3331	0.506279	0.21726	5.02467	0.0249887	0.201886	0.0249535	0.466339	0.00258489	-0.630782	0.0213419	0.0217956
chr1_161433530_161433618	chr1_161433532_161433562	GTCAGGATGGCCGAGCGGTCTAAGGCGCTGC	9	31	32894	plus	0.730675	0.730675	0.730675	chr1_161433532_161433562	chr1_161433532_161433562	169.476	0.169392	0.185415	0.792077	0.373473	0.725189	0.0069593	0.478848	0.0151656	-0.43013	0.00692146	0.0216899
chr1_161433530_161433618	chr1_161433535_161433555	AGGATGGCCGAGCGGTCTAAG	10	21	156640	plus	0.504191	0.504191	0.504191	chr1_161433535_161433555	chr1_161433535_161433555	804.141	-0.0652589	0.190667	0.118371	0.730808	0.906844	1.6597e-05	0.772422	0.0478219	-0.354887	0.0382647	0.0169104
chr1_161433530_161433618	chr1_161433535_161433557	AGGATGGCCGAGCGGTCTAAGGC	10	23	12188	plus	NA	NA	0.504191	chr1_161433535_161433557	chr1_161433535_161433557	65.3318	0.314708	0.211066	2.19705	0.138275	0.480118	0.053414	0.384815	0.0547005	-0.385582	0.0144092	0.0221394
chr1_161433530_161433618	chr1_161433547_161433563	CGGTCTAAGGCGCTGCG	9	17	8235	plus	NA	NA	Inf	chr1_161433547_161433563	chr1_161433547_161433563	41.6796	-0.126161	0.219054	0.336058	0.562114	0.83094	0.0955982	0.352818	0.69297	-0.0829452	0.419517	0.0080547
chr1_161433530_161433618	chr1_161433564_161433581	TTCAGGTCGCAGTCTCCC	9	18	8499	plus	1	1	1	chr1_161433564_161433581	chr1_161433564_161433581	37.7262	0.311364	0.174679	3.12049	0.0773134	0.361223	0.0769411	0.294666	0.113627	0.26565	0.257442	0.00909373
chr1_161433530_161433618	chr1_161433576_161433596	TCTCCCCTGGAGGCGTGGGTT	9	21	15877	plus	1	1	1	chr1_161433576_161433596	chr1_161433576_161433596	83.3303	0.0852664	0.184066	0.203214	0.652139	0.871471	0.059337	0.331019	0.0695428	-0.320235	0.877282	0.00130566
chr1_161435250_161435347	chr1_161435258_161435274	GCATGGGTGGTTCAGTG	9	17	13586	plus	0.374534	0.374534	0.374534	chr1_161435258_161435274	chr1_161435258_161435274	62.166	0.124843	0.187747	0.483845	0.486686	0.78956	0.033542	-0.379083	0.0202671	0.421911	0.767514	-0.00257134
chr1_161435250_161435347	chr1_161435258_161435275	GCATGGGTGGTTCAGTGG	7	18	33139	plus	0.396071	0.396071	0.396071	chr1_161435258_161435275	chr1_161435258_161435275	158.82	-0.0154056	0.148717	0.0112082	0.915687	0.9729	0.934595	-0.0114596	0.892946	0.0191022	0.558411	0.00396265
chr1_161435250_161435347	chr1_161435258_161435276	GCATGGGTGGTTCAGTGGT	6	19	18476	plus	0.523541	0.523541	0.517632	chr1_161435258_161435276	chr1_161435258_161435276	88.4217	-0.0616443	0.14084	0.20006	0.654672	0.871944	0.60246	0.068352	0.500123	0.0904566	0.406685	0.00526482
chr1_161435250_161435347	chr1_161435258_161435277	GCATGGGTGGTTCAGTGGTA	6	20	55255	plus	0.384495	0.384495	0.384495	chr1_161435258_161435277	chr1_161435258_161435277	276.83	-0.117828	0.145584	0.680935	0.409265	0.750146	0.0010128	0.447183	0.928264	-0.0124678	0.0962124	0.0107193
chr1_161435250_161435347	chr1_161435258_161435278	GCATGGGTGGTTCAGTGGTAG	6	21	27491	plus	0.38241	0.38241	0.381246	chr1_161435258_161435278	chr1_161435258_161435278	136.077	-0.0567963	0.108204	0.279624	0.596948	0.848796	0.958325	0.00527302	0.208702	-0.128955	0.11327	0.00784687
chr1_161435250_161435347	chr1_161435258_161435279	GCATGGGTGGTTCAGTGGTAGA	6	22	26655	plus	0.292305	0.292305	0.214777	chr1_161435258_161435279	chr1_161435258_161435279	127.663	-0.36451	0.12233	9.24523	0.0023611	0.0589038	0.325418	0.112988	0.0149044	0.285469	0.0157665	0.0133812
chr1_161435250_161435347	chr1_161435258_161435280	GCATGGGTGGTTCAGTGGTAGAA	6	23	24491	plus	0.299013	0.299013	0.299013	chr1_161435258_161435280	chr1_161435258_161435280	122.147	-0.196539	0.114519	3.05297	0.0805897	0.370257	0.0894094	0.181717	0.322549	-0.107305	0.0220907	0.0117976
chr1_161435250_161435347	chr1_161435258_161435281	GCATGGGTGGTTCAGTGGTAGAAT	6	24	21197	plus	0.390264	0.390264	0.388621	chr1_161435258_161435281	chr1_161435258_161435281	103.942	-0.165954	0.117812	2.01695	0.155551	0.501825	0.257127	0.125253	0.946683	0.00747319	0.152078	0.00763133
chr1_161435250_161435347	chr1_161435258_161435282	GCATGGGTGGTTCAGTGGTAGAATT	6	25	35953	plus	0.426702	0.426702	0.314498	chr1_161435258_161435282	chr1_161435258_161435282	170.382	-0.167597	0.141926	1.40334	0.236166	0.605137	0.891962	0.0180981	0.120592	0.211026	0.39957	0.00558212
chr1_161435250_161435347	chr1_161435258_161435283	GCATGGGTGGTTCAGTGGTAGAATTC	6	26	18629	plus	0.529493	0.529493	0.496281	chr1_161435258_161435283	chr1_161435258_161435283	88.285	-0.144214	0.127469	1.30462	0.253371	0.617889	0.486209	0.0833829	0.51534	0.0789816	0.377237	0.00513619
chr1_161435250_161435347	chr1_161435258_161435284	GCATGGGTGGTTCAGTGGTAGAATTCT	6	27	9188	plus	0.543522	0.543522	0.496714	chr1_161435258_161435284	chr1_161435258_161435284	42.645	-0.101856	0.147608	0.491557	0.483233	0.78956	0.770046	-0.0404919	0.265967	0.15662	0.442094	0.00528889
chr1_161435250_161435347	chr1_161435258_161435285	GCATGGGTGGTTCAGTGGTAGAATTCTC	5	28	11632	plus	0.548816	0.548816	0.531281	chr1_161435258_161435285	chr1_161435258_161435285	53.924	-0.0505288	0.129924	0.155508	0.693326	0.893471	0.869254	0.0200488	0.200418	0.158316	0.663191	0.00259484
chr1_161435250_161435347	chr1_161435258_161435287	GCATGGGTGGTTCAGTGGTAGAATTCTCGC	5	30	26129	plus	0.674369	0.674369	0.625875	chr1_161435258_161435287	chr1_161435258_161435287	121.779	-0.275163	0.150091	3.20786	0.0732852	0.352671	0.434024	0.109047	0.344517	0.136331	0.704937	0.00263923
chr1_161435250_161435347	chr1_161435258_161435288	GCATGGGTGGTTCAGTGGTAGAATTCTCGCC	5	31	16545	plus	0.674369	0.674369	0.674369	chr1_161435258_161435288	chr1_161435258_161435288	77.0366	-0.297474	0.14642	4.04213	0.0443777	0.272697	0.835106	0.0284174	0.767651	0.0412854	0.0744249	-0.0123175
chr1_161435250_161435347	chr1_161435263_161435280	GGTGGTTCAGTGGTAGAA	29	18	30760	plus	0.557785	0.557785	0.369994	chr1_161435263_161435280	chr1_161435263_161435280	145.044	0.0451021	0.123379	0.138408	0.709869	0.900391	0.329573	-0.114001	0.0267719	0.261561	0.413985	0.00457384
chr1_161435250_161435347	chr1_161435263_161435281	GGTGGTTCAGTGGTAGAAT	29	19	22282	plus	0.557785	0.557785	0.349957	chr1_161435263_161435281	chr1_161435263_161435281	105.931	-0.0831226	0.105102	0.653655	0.418809	0.753865	0.851593	-0.018465	0.0140155	0.246356	0.00886422	0.0124083
chr1_161435250_161435347	chr1_161435276_161435295	TAGAATTCTCGCCTGCCACG	12	20	11967	plus	1	1	1	chr1_161435276_161435295	chr1_161435276_161435295	60.3167	-0.0929714	0.114779	0.65416	0.418629	0.753865	0.000189937	0.403707	0.393083	0.0936883	0.000441792	0.0181103
chr1_161435250_161435347	chr1_161435284_161435309	TCGCCTGCCACGCGGGAGGCCCGGGT	12	26	19408	plus	NA	0.2515	Inf	chr1_161435284_161435309	chr1_161435284_161435309	92.2705	0.164422	0.12285	1.71183	0.190748	0.548659	0.0419314	0.234126	0.277641	-0.126377	0.317512	0.00562327
chr1_161435250_161435347	chr1_161435287_161435309	CCTGCCACGCGGGAGGCCCGGGT	12	23	22892	plus	0.587803	0.539009	0.587803	chr1_161435287_161435309	chr1_161435287_161435309	112.404	0.224225	0.140977	2.4114	0.120454	0.450196	0.467813	0.0962048	0.465644	-0.0974643	0.902761	0.000796124
chr1_161435250_161435347	chr1_161435288_161435309	CTGCCACGCGGGAGGCCCGGGT	12	22	21001	plus	0.531942	0.531942	0.531942	chr1_161435288_161435309	chr1_161435288_161435309	104.966	0.135976	0.124827	1.12399	0.289062	0.653623	0.414784	0.0962305	0.985889	0.00211347	0.718064	0.00205647
chr1_161435250_161435347	chr1_161435289_161435309	TGCCACGCGGGAGGCCCGGGT	12	21	11705	plus	0.430752	0.444221	0.430752	chr1_161435289_161435309	chr1_161435289_161435309	57.0707	0.095959	0.131957	0.511934	0.474303	0.783641	0.0287807	0.272343	0.942547	-0.0090294	0.302113	0.00635894
chr1_161439172_161439308	chr1_161439206_161439228	GAACCCGGGCCGCGGCGGTGAGA	8	23	24137	minus	1	1	1	chr1_161439206_161439228	chr1_161439206_161439228	130.385	0.152082	0.291313	0.241147	0.623379	0.856674	0.825973	0.0603288	0.0597103	-0.539782	0.276987	-0.0152941
chr1_161439172_161439308	chr1_161439224_161439245	TGAGAGCGCCGAATCCTAACCA	10	22	28091	minus	NA	NA	0.11992	chr1_161439224_161439245	chr1_161439224_161439245	138.004	-0.0775919	0.0893806	0.759114	0.383606	0.730267	0.00135669	0.268766	0.0515005	-0.164444	0.00509939	0.0111546
chr1_161439172_161439308	chr1_161439226_161439260	AGAGCGCCGAATCCTAACCACTAGACCACCAGGGA	8	35	42824	minus	0.623967	0.623967	0.499253	chr1_161439226_161439260	chr1_161439226_161439260	199.468	0.116438	0.122908	0.876174	0.349252	0.709198	0.359881	-0.106398	0.0323533	-0.249403	0.613973	0.00283455
chr1_161439172_161439308	chr1_161439227_161439245	GAGCGCCGAATCCTAACCA	10	19	24034	minus	0.517193	0.307087	0.287477	chr1_161439227_161439245	chr1_161439227_161439245	112.673	0.00390834	0.12057	0.00108359	0.97374	0.990514	0.0706703	0.204245	0.192634	0.1497	0.0462764	0.0111026
chr1_161439172_161439308	chr1_161439227_161439247	GAGCGCCGAATCCTAACCACT	9	21	39504	minus	0.304462	0.252186	0.264186	chr1_161439227_161439247	chr1_161439227_161439247	189.801	-0.0633308	0.0974922	0.437946	0.508115	0.80061	0.00789919	0.242293	0.393092	-0.078957	0.0251364	0.00985221
chr1_161439172_161439308	chr1_161439227_161439260	GAGCGCCGAATCCTAACCACTAGACCACCAGGGA	8	34	33490	minus	0.440202	0.440202	0.440202	chr1_161439227_161439260	chr1_161439227_161439260	156.812	0.434543	0.143718	8.74767	0.00309998	0.068202	0.244728	0.160361	0.174507	-0.188877	0.0562735	-0.013021
chr1_161439172_161439308	chr1_161439228_161439245	AGCGCCGAATCCTAACCA	10	18	24127	minus	0.517193	0.202153	0.37479	chr1_161439228_161439245	chr1_161439228_161439245	112.736	0.0226467	0.129485	0.031256	0.85967	0.956995	0.615119	-0.0611999	0.166995	0.170008	0.315078	0.00594137
chr1_161439172_161439308	chr1_161439228_161439247	AGCGCCGAATCCTAACCACT	9	20	54879	minus	0.370005	0.338273	0.302532	chr1_161439228_161439247	chr1_161439228_161439247	263.981	-0.109027	0.0939389	1.3755	0.240869	0.610252	0.0386767	0.181537	0.244749	0.103963	0.00434882	0.0121871
chr1_161439172_161439308	chr1_161439228_161439248	AGCGCCGAATCCTAACCACTA	9	21	29542	minus	0.245741	0.245741	0.209395	chr1_161439228_161439248	chr1_161439228_161439248	142.971	-0.0984445	0.101524	0.943779	0.331308	0.691691	0.0096518	0.244983	0.52762	-0.0605799	0.00518465	0.0130336
chr1_161439172_161439308	chr1_161439228_161439260	AGCGCCGAATCCTAACCACTAGACCACCAGGGA	8	33	183344	minus	0.284625	0.284625	0.284625	chr1_161439228_161439260	chr1_161439228_161439260	859.441	0.144183	0.102955	1.86108	0.1725	0.522906	0.469792	-0.0701009	1.1016e-05	-0.43083	0.797099	0.00121785
chr1_161439172_161439308	chr1_161439229_161439247	GCGCCGAATCCTAACCACT	9	19	45133	minus	0.302991	0.331391	0.256595	chr1_161439229_161439247	chr1_161439229_161439247	213.577	-0.024996	0.0997242	0.0639696	0.800328	0.934908	0.675043	0.0392095	0.402333	0.0790888	0.0562749	0.0085557
chr1_161439172_161439308	chr1_161439229_161439248	GCGCCGAATCCTAACCACTA	9	20	23287	minus	0.290317	0.290317	0.28107	chr1_161439229_161439248	chr1_161439229_161439248	111.405	-0.107908	0.0943572	1.31423	0.25163	0.617308	0.500264	0.0594421	0.216888	-0.110148	0.200906	0.00546434
chr1_161439172_161439308	chr1_161439229_161439260	GCGCCGAATCCTAACCACTAGACCACCAGGGA	8	32	159624	minus	0.418443	0.418443	0.348822	chr1_161439229_161439260	chr1_161439229_161439260	743.595	0.00601417	0.14017	0.00164155	0.967682	0.988699	0.460052	-0.0963437	0.469927	-0.0970016	0.831977	0.00135581
chr1_161439172_161439308	chr1_161439230_161439260	CGCCGAATCCTAACCACTAGACCACCAGGGA	8	31	86891	minus	0.631756	0.631756	0.456466	chr1_161439230_161439260	chr1_161439230_161439260	411.063	-0.251919	0.198584	1.29957	0.254292	0.618699	0.354916	-0.175332	0.313252	-0.201436	0.0762656	-0.016781
chr1_161439172_161439308	chr1_161439231_161439248	GCCGAATCCTAACCACTA	12	18	24474	minus	NA	NA	0.383012	chr1_161439231_161439248	chr1_161439231_161439248	113.536	0.0501216	0.148452	0.120029	0.729003	0.90631	0.181688	-0.186051	0.221564	0.172435	0.547776	0.00416423
chr1_161439172_161439308	chr1_161439231_161439260	GCCGAATCCTAACCACTAGACCACCAGGGA	9	30	85633	minus	0.527261	0.527261	0.527261	chr1_161439231_161439260	chr1_161439231_161439260	400.766	-0.174248	0.116934	2.13003	0.144438	0.48531	0.566872	0.0623828	0.431394	-0.088191	0.76449	0.00157306
chr1_161439172_161439308	chr1_161439233_161439260	CGAATCCTAACCACTAGACCACCAGGGA	9	28	27921	minus	0.390341	0.390341	0.390341	chr1_161439233_161439260	chr1_161439233_161439260	130.864	-0.0301175	0.117132	0.0673395	0.795251	0.932344	0.618733	0.0545462	0.0517255	-0.218676	0.489309	0.00367407
chr1_161439172_161439308	chr1_161439234_161439260	GAATCCTAACCACTAGACCACCAGGGA	12	27	102132	minus	0.646157	0.646157	0.646157	chr1_161439234_161439260	chr1_161439234_161439260	479.116	-0.0227427	0.108884	0.0443429	0.833217	0.94752	0.524374	0.0653228	0.191735	-0.135155	0.842823	-0.000980812
chr1_161439172_161439308	chr1_161439235_161439260	AATCCTAACCACTAGACCACCAGGGA	13	26	410544	minus	0.622263	0.622263	0.546598	chr1_161439235_161439260	chr1_161439235_161439260	1905.94	-0.317742	0.155372	4.3652	0.0366801	0.249689	0.431285	0.11447	0.575893	0.0829988	0.197515	0.00926031
chr1_161439172_161439308	chr1_161439236_161439260	ATCCTAACCACTAGACCACCAGGGA	14	25	82652	minus	0.529179	0.529179	0.515772	chr1_161439236_161439260	chr1_161439236_161439260	395.811	-0.291009	0.096334	9.29948	0.00229219	0.0578968	0.58193	0.0499572	0.968946	0.00358631	0.314762	0.00435938
chr1_161439172_161439308	chr1_161439238_161439260	CCTAACCACTAGACCACCAGGGA	18	23	24924	minus	1	1	0.214017	chr1_161439238_161439260	chr1_161439238_161439260	125.368	-0.536764	0.119951	20.6386	5.54675e-06	0.00194705	0.15978	0.158713	0.678353	-0.0474977	0.684455	-0.00220122
chr1_161439172_161439308	chr1_161439243_161439260	CCACTAGACCACCAGGGA	38	18	32352	minus	1	1	0.636627	chr1_161439243_161439260	chr1_161439243_161439260	148.985	-0.118316	0.151788	0.661609	0.415992	0.753865	0.621125	-0.0707597	0.058132	0.278397	0.486681	0.00499242
chr1_161440185_161440296	chr1_161440224_161440245	ACCCCGGTCTCCCGCGTGACAG	14	22	36341	minus	0.555459	0.555459	0.191651	chr1_161440224_161440245	chr1_161440224_161440245	175.385	-0.270436	0.135964	3.88964	0.0485847	0.284133	0.000324817	0.456329	0.0119582	-0.322075	0.00347446	0.0178385
chr1_161440185_161440296	chr1_161440224_161440246	ACCCCGGTCTCCCGCGTGACAGG	13	23	28132	minus	0.555459	0.555459	0.421527	chr1_161440224_161440246	chr1_161440224_161440246	135.998	-0.0627228	0.138479	0.201095	0.653839	0.871944	5.32222e-05	0.522718	0.00415006	-0.374016	0.0304838	0.0135228
chr1_161440185_161440296	chr1_161440234_161440258	CCCGCGTGACAGGCGGGGATACTCA	12	25	10722	minus	1	1	1	chr1_161440234_161440258	chr1_161440234_161440258	53.7974	0.00141068	0.241514	3.88505e-05	0.995027	0.998335	0.101762	0.372591	0.043524	-0.469905	0.296468	0.0121143
chr1_161440185_161440296	chr1_161440245_161440276	GGCGGGGATACTCACCACTATACTAACGAGGA	11	32	13030	minus	0.160448	0.160448	0.160448	chr1_161440245_161440276	chr1_161440245_161440276	61.5618	-0.188196	0.126363	2.14879	0.142682	0.484155	0.000235295	0.436748	0.0111849	-0.30496	0.273668	0.00637543
chr1_161440185_161440296	chr1_161440247_161440276	CGGGGATACTCACCACTATACTAACGAGGA	11	30	17484	minus	1	1	0.160448	chr1_161440247_161440276	chr1_161440247_161440276	84.6194	-0.0426808	0.103269	0.169293	0.680741	0.885721	0.000950394	0.32224	0.0119671	-0.245111	0.000342116	0.0164198
chr1_161440185_161440296	chr1_161440250_161440276	GGATACTCACCACTATACTAACGAGGA	11	27	8922	minus	0.0774888	0.0774888	0.0774888	chr1_161440250_161440276	chr1_161440250_161440276	42.3773	0.0102026	0.106555	0.00891834	0.924762	0.975063	0.806288	-0.024865	0.0329199	-0.215899	0.0375956	0.00988621
chr1_161440185_161440296	chr1_161440251_161440276	GATACTCACCACTATACTAACGAGGA	11	26	12709	minus	0.195564	0.195564	0.195564	chr1_161440251_161440276	chr1_161440251_161440276	60.4991	0.0527041	0.117246	0.199111	0.655439	0.871944	0.153553	-0.158934	0.920301	-0.0111753	0.941941	-0.00038622
chr1_161440185_161440296	chr1_161440252_161440276	ATACTCACCACTATACTAACGAGGA	11	25	37784	minus	0.329427	0.329427	0.329427	chr1_161440252_161440276	chr1_161440252_161440276	192.787	-0.343725	0.117814	8.688	0.00320312	0.0693291	0.192508	0.146545	0.34371	0.10748	0.421215	0.0042158
chr1_161440185_161440296	chr1_161440253_161440276	TACTCACCACTATACTAACGAGGA	11	24	32994	minus	0.41231	0.41231	0.41231	chr1_161440253_161440276	chr1_161440253_161440276	167.997	-0.263603	0.096224	7.6729	0.00560562	0.0917953	0.0535866	0.176839	0.534221	0.0576637	0.368092	0.00392808
chr1_161440185_161440296	chr1_161440254_161440276	ACTCACCACTATACTAACGAGGA	12	23	175888	minus	0.387891	0.387891	0.353586	chr1_161440254_161440276	chr1_161440254_161440276	912.363	-0.334096	0.0934186	12.8894	0.00033045	0.0189481	0.0217036	0.204478	0.966021	0.00382869	0.768727	-0.00123
chr1_161440185_161440296	chr1_161440255_161440276	CTCACCACTATACTAACGAGGA	12	22	42627	minus	0.308702	0.308702	0.308702	chr1_161440255_161440276	chr1_161440255_161440276	221.723	-0.211665	0.0935664	5.06845	0.0243651	0.200125	0.0299989	0.193178	0.0861914	-0.154546	0.150277	0.00586636
chr1_161440185_161440296	chr1_161440256_161440276	TCACCACTATACTAACGAGGA	13	21	28356	minus	0.274487	0.274487	0.239256	chr1_161440256_161440276	chr1_161440256_161440276	143.649	-0.174902	0.0823619	4.52187	0.0334642	0.234065	0.661896	0.0340644	0.935878	0.00632972	0.0766742	0.00662168
chr1_161440185_161440296	chr1_161440257_161440276	CACCACTATACTAACGAGGA	13	20	62030	minus	0.184425	0.184425	0.175903	chr1_161440257_161440276	chr1_161440257_161440276	311.684	-0.184486	0.0675483	7.47213	0.00626612	0.0978677	0.302568	0.0660909	0.306665	0.0660745	0.0861223	0.00524874
chr1_161440185_161440296	chr1_161440259_161440276	CCACTATACTAACGAGGA	16	18	17931	minus	1	1	0.0099193	chr1_161440259_161440276	chr1_161440259_161440276	84.776	0.107176	0.120082	0.755558	0.384722	0.730267	0.149365	-0.168651	0.661822	0.0504524	0.468784	-0.00401808
chr1_161440911_161440995	chr1_161440913_161440932	GTCAGGATGGCCGAGCGGTC	10	20	10527	plus	0.0291528	0.0291528	0.0291528	chr1_161440913_161440932	chr1_161440913_161440932	51.8857	-0.0800282	0.0936424	0.714319	0.398014	0.739147	0.417007	0.0724876	0.338368	-0.0852608	0.0146119	0.0100994
chr1_161440911_161440995	chr1_161440913_161440933	GTCAGGATGGCCGAGCGGTCT	10	21	13537	plus	0.147399	0.147399	0.144598	chr1_161440913_161440933	chr1_161440913_161440933	67.6756	-0.287318	0.0888585	10.4733	0.00121112	0.0395947	0.219591	0.102857	0.200707	-0.108309	0.117447	0.00629945
chr1_161440911_161440995	chr1_161440913_161440934	GTCAGGATGGCCGAGCGGTCTA	10	22	50714	plus	0.11039	0.0497522	0.105456	chr1_161440913_161440934	chr1_161440913_161440934	260.387	-0.0447406	0.0884	0.26086	0.60953	0.853531	0.0424087	0.168032	0.883573	-0.0123134	0.0170836	0.0094945
chr1_161440911_161440995	chr1_161440913_161440936	GTCAGGATGGCCGAGCGGTCTAAG	10	24	34375	plus	0.0987519	0.435681	0.0264978	chr1_161440913_161440936	chr1_161440913_161440936	181.167	0.0897428	0.172893	0.257955	0.611529	0.853531	0.00371702	0.471466	0.0104598	-0.418606	0.0224296	0.0170265
chr1_161440911_161440995	chr1_161440913_161440937	GTCAGGATGGCCGAGCGGTCTAAGG	10	25	40802	plus	0.0273354	1.02933e-05	0.0250451	chr1_161440913_161440937	chr1_161440913_161440937	193.709	-0.14578	0.0979878	2.15229	0.142357	0.484155	0.819643	-0.0209595	0.333265	-0.0899659	0.0184093	0.0104944
chr1_161440911_161440995	chr1_161440913_161440938	GTCAGGATGGCCGAGCGGTCTAAGGC	10	26	35440	plus	0.0753514	0.131707	0.0753514	chr1_161440913_161440938	chr1_161440913_161440938	177.69	0.0712735	0.170946	0.169816	0.680275	0.885721	0.0718034	0.291818	0.00179004	-0.508976	0.0346479	0.0154365
chr1_161440911_161440995	chr1_161440913_161440942	GTCAGGATGGCCGAGCGGTCTAAGGCGCTG	10	30	16938	plus	0.730675	0.730675	0.730675	chr1_161440913_161440942	chr1_161440913_161440942	92.3331	0.506279	0.21726	5.02467	0.0249887	0.201886	0.0249535	0.466339	0.00258489	-0.630782	0.0213419	0.0217956
chr1_161440911_161440995	chr1_161440913_161440943	GTCAGGATGGCCGAGCGGTCTAAGGCGCTGC	9	31	32894	plus	0.730675	0.730675	0.730675	chr1_161440913_161440943	chr1_161440913_161440943	169.476	0.169392	0.185415	0.792077	0.373473	0.725189	0.0069593	0.478848	0.0151656	-0.43013	0.00692146	0.0216899
chr1_161440911_161440995	chr1_161440916_161440936	AGGATGGCCGAGCGGTCTAAG	10	21	156640	plus	0.504191	0.504191	0.504191	chr1_161440916_161440936	chr1_161440916_161440936	804.141	-0.0652589	0.190667	0.118371	0.730808	0.906844	1.6597e-05	0.772422	0.0478219	-0.354887	0.0382647	0.0169104
chr1_161440911_161440995	chr1_161440916_161440938	AGGATGGCCGAGCGGTCTAAGGC	10	23	12188	plus	NA	NA	0.504191	chr1_161440916_161440938	chr1_161440916_161440938	65.3318	0.314708	0.211066	2.19705	0.138275	0.480118	0.053414	0.384815	0.0547005	-0.385582	0.0144092	0.0221394
chr1_161440911_161440995	chr1_161440928_161440944	CGGTCTAAGGCGCTGCG	9	17	8235	plus	NA	NA	Inf	chr1_161440928_161440944	chr1_161440928_161440944	41.6796	-0.126161	0.219054	0.336058	0.562114	0.83094	0.0955982	0.352818	0.69297	-0.0829452	0.419517	0.0080547
chr1_161440911_161440995	chr1_161440945_161440962	TTCAGGTCGCAGTCTCCC	9	18	8499	plus	1	1	1	chr1_161440945_161440962	chr1_161440945_161440962	37.7262	0.311364	0.174679	3.12049	0.0773134	0.361223	0.0769411	0.294666	0.113627	0.26565	0.257442	0.00909373
chr1_161440911_161440995	chr1_161440957_161440977	TCTCCCCTGGAGGCGTGGGTT	9	21	15877	plus	1	1	1	chr1_161440957_161440977	chr1_161440957_161440977	83.3303	0.0852664	0.184066	0.203214	0.652139	0.871471	0.059337	0.331019	0.0695428	-0.320235	0.877282	0.00130566
chr1_161493613_161493734	chr1_161493677_161493707	GGCGAGAATTCTACCACTGAACCACCAATGC	12	31	313120	minus	0.863514	0.863514	0.863514	chr1_161493677_161493707	chr1_161493677_161493707	1422.8	-0.306113	0.152054	4.20903	0.0402094	0.262089	0.801509	-0.035474	0.457454	0.107891	0.620634	0.00347266
chr1_161493613_161493734	chr1_161493678_161493707	GCGAGAATTCTACCACTGAACCACCAATGC	12	30	329276	minus	0.843979	0.843979	0.843979	chr1_161493678_161493707	chr1_161493678_161493707	1502.26	-0.418822	0.153373	7.49449	0.00618879	0.0972727	0.187023	0.18767	0.953172	0.00857358	0.48179	0.0049989
chr1_161493613_161493734	chr1_161493679_161493707	CGAGAATTCTACCACTGAACCACCAATGC	12	29	36878	minus	0.758034	0.758034	0.723178	chr1_161493679_161493707	chr1_161493679_161493707	173.14	-0.198001	0.112064	3.21208	0.0730965	0.352667	0.119755	0.162379	0.622493	0.052569	0.444976	0.00376613
chr1_161493613_161493734	chr1_161493680_161493707	GAGAATTCTACCACTGAACCACCAATGC	14	28	79530	minus	0.757732	0.757732	0.723902	chr1_161493680_161493707	chr1_161493680_161493707	369.959	-0.187974	0.123068	2.40836	0.120689	0.450383	0.5135	0.0754054	0.242283	0.137762	0.93443	0.000454759
chr1_161493613_161493734	chr1_161493681_161493707	AGAATTCTACCACTGAACCACCAATGC	14	27	61128	minus	0.742642	0.742642	0.742642	chr1_161493681_161493707	chr1_161493681_161493707	283.552	-0.1529	0.128215	1.46421	0.226262	0.595334	0.259434	0.136309	0.365216	0.111116	0.154431	0.00821774
chr1_161493613_161493734	chr1_161493682_161493707	GAATTCTACCACTGAACCACCAATGC	14	26	146476	minus	0.735786	0.735786	0.735786	chr1_161493682_161493707	chr1_161493682_161493707	699.463	-0.166667	0.120048	1.97708	0.159698	0.507642	0.251332	0.129083	0.5366	0.070865	0.106	0.00867492
chr1_161493613_161493734	chr1_161493683_161493707	AATTCTACCACTGAACCACCAATGC	14	25	199461	minus	0.701966	0.701966	0.701966	chr1_161493683_161493707	chr1_161493683_161493707	950.069	-0.379488	0.145353	7.11444	0.00764656	0.108958	0.667047	0.0588813	0.0492711	0.275088	0.711641	0.0024656
chr1_161493613_161493734	chr1_161493684_161493704	ATTCTACCACTGAACCACCAA	17	21	42796	minus	0.450988	0.174205	0.284058	chr1_161493684_161493704	chr1_161493684_161493704	211.512	-0.172295	0.0801413	4.71288	0.0299374	0.22103	0.0323847	0.161381	0.780824	0.0212242	0.000709942	0.0120952
chr1_161493613_161493734	chr1_161493684_161493707	ATTCTACCACTGAACCACCAATGC	14	24	92361	minus	0.736328	0.736328	0.736328	chr1_161493684_161493707	chr1_161493684_161493707	447.564	-0.291327	0.106584	7.68528	0.00556729	0.0916999	0.242623	0.116889	0.201852	0.130247	0.177225	0.00637832
chr1_161493613_161493734	chr1_161493685_161493704	TTCTACCACTGAACCACCAA	17	20	58901	minus	0.450988	0.113402	0.25771	chr1_161493685_161493704	chr1_161493685_161493704	292.58	-0.0267615	0.0735989	0.134742	0.713565	0.901774	0.00557295	0.191912	0.392302	0.059827	0.000257401	0.011881
chr1_161493613_161493734	chr1_161493685_161493707	TTCTACCACTGAACCACCAATGC	14	23	219810	minus	0.764076	0.764076	0.72972	chr1_161493685_161493707	chr1_161493685_161493707	1079.41	-0.254987	0.0904564	8.20054	0.00418779	0.0791043	0.0677086	0.154975	0.187815	0.113793	0.0396752	0.00833793
chr1_161493613_161493734	chr1_161493686_161493707	TCTACCACTGAACCACCAATGC	14	22	395927	minus	0.62345	0.62345	0.62345	chr1_161493686_161493707	chr1_161493686_161493707	1899.68	-0.440296	0.12767	12.6127	0.000383134	0.0206907	0.382899	0.104422	0.0435411	0.247141	0.039948	0.0117919
chr1_161493613_161493734	chr1_161493687_161493707	CTACCACTGAACCACCAATGC	14	21	157264	minus	0.605017	0.605017	0.605017	chr1_161493687_161493707	chr1_161493687_161493707	768.341	-0.258787	0.0833064	9.88033	0.00167055	0.0477199	0.086629	0.133862	0.447993	0.0601981	0.00976888	0.00954348
chr1_161493613_161493734	chr1_161493688_161493707	TACCACTGAACCACCAATGC	14	20	119274	minus	0.531474	0.531474	0.445058	chr1_161493688_161493707	chr1_161493688_161493707	572.368	-0.198062	0.106207	3.64222	0.0563318	0.307336	0.00193335	0.308989	0.537633	0.0625172	0.0274558	0.0103695
chr1_161493613_161493734	chr1_161493689_161493707	ACCACTGAACCACCAATGC	15	19	62232	minus	0.555096	0.555096	0.555096	chr1_161493689_161493707	chr1_161493689_161493707	292.362	-0.237959	0.123882	3.87421	0.0490335	0.284888	0.140119	0.172048	0.582874	0.0652313	0.13249	0.00828188
chr1_161493613_161493734	chr1_161493690_161493707	CCACTGAACCACCAATGC	15	18	123612	minus	0.696471	0.696471	0.58585	chr1_161493690_161493707	chr1_161493690_161493707	579.305	-0.144575	0.135278	1.21208	0.27092	0.63421	0.314913	-0.128144	0.0407701	0.265822	0.61962	0.00300113
chr1_161493613_161493734	chr1_161493691_161493707	CACTGAACCACCAATGC	15	17	153255	minus	0.756218	0.756218	0.657198	chr1_161493691_161493707	chr1_161493691_161493707	705.279	0.151762	0.174535	0.814667	0.366744	0.719589	0.084713	-0.286543	0.00358986	0.493822	0.816323	-0.0018671
chr1_161493613_161493734	chr1_161493692_161493707	ACTGAACCACCAATGC	18	16	53625	minus	0.827121	0.827121	0.761612	chr1_161493692_161493707	chr1_161493692_161493707	245.685	-0.0642174	0.209457	0.103458	0.747718	0.915853	0.063436	-0.369166	0.0159071	0.491191	0.933428	-0.000806614
chr1_161500106_161500223	chr1_161500150_161500170	AACCCACGCCTCCAGGGGAGA	9	21	15877	minus	1	1	1	chr1_161500150_161500170	chr1_161500150_161500170	83.3303	0.0852664	0.184066	0.203214	0.652139	0.871471	0.059337	0.331019	0.0695428	-0.320235	0.877282	0.00130566
chr1_161500106_161500223	chr1_161500165_161500182	GGGAGACTGCGACCTGAA	9	18	8499	minus	1	1	1	chr1_161500165_161500182	chr1_161500165_161500182	37.7262	0.311364	0.174679	3.12049	0.0773134	0.361223	0.0769411	0.294666	0.113627	0.26565	0.257442	0.00909373
chr1_161500106_161500223	chr1_161500183_161500199	CGCAGCGCCTTAGACCG	9	17	8235	minus	NA	NA	Inf	chr1_161500183_161500199	chr1_161500183_161500199	41.6796	-0.126161	0.219054	0.336058	0.562114	0.83094	0.0955982	0.352818	0.69297	-0.0829452	0.419517	0.0080547
chr1_161500106_161500223	chr1_161500184_161500214	GCAGCGCCTTAGACCGCTCGGCCATCCTGAC	9	31	32894	minus	0.730675	0.730675	0.730675	chr1_161500184_161500214	chr1_161500184_161500214	169.476	0.169392	0.185415	0.792077	0.373473	0.725189	0.0069593	0.478848	0.0151656	-0.43013	0.00692146	0.0216899
chr1_161500106_161500223	chr1_161500185_161500214	CAGCGCCTTAGACCGCTCGGCCATCCTGAC	10	30	16938	minus	0.730675	0.730675	0.730675	chr1_161500185_161500214	chr1_161500185_161500214	92.3331	0.506279	0.21726	5.02467	0.0249887	0.201886	0.0249535	0.466339	0.00258489	-0.630782	0.0213419	0.0217956
chr1_161500106_161500223	chr1_161500189_161500211	GCCTTAGACCGCTCGGCCATCCT	10	23	12188	minus	0.504191	0.303048	0.504191	chr1_161500189_161500211	chr1_161500189_161500211	65.3318	0.314708	0.211066	2.19705	0.138275	0.480118	0.053414	0.384815	0.0547005	-0.385582	0.0144092	0.0221394
chr1_161500106_161500223	chr1_161500189_161500214	GCCTTAGACCGCTCGGCCATCCTGAC	10	26	35440	minus	0.204688	0.204688	0.0753514	chr1_161500189_161500214	chr1_161500189_161500214	177.69	0.0712735	0.170946	0.169816	0.680275	0.885721	0.0718034	0.291818	0.00179004	-0.508976	0.0346479	0.0154365
chr1_161500106_161500223	chr1_161500190_161500214	CCTTAGACCGCTCGGCCATCCTGAC	10	25	40802	minus	0.0250451	0.0250451	0.0250451	chr1_161500190_161500214	chr1_161500190_161500214	193.709	-0.14578	0.0979878	2.15229	0.142357	0.484155	0.819643	-0.0209595	0.333265	-0.0899659	0.0184093	0.0104944
chr1_161500106_161500223	chr1_161500191_161500211	CTTAGACCGCTCGGCCATCCT	10	21	156640	minus	NA	0.0854064	0.504191	chr1_161500191_161500211	chr1_161500191_161500211	804.141	-0.0652589	0.190667	0.118371	0.730808	0.906844	1.6597e-05	0.772422	0.0478219	-0.354887	0.0382647	0.0169104
chr1_161500106_161500223	chr1_161500191_161500214	CTTAGACCGCTCGGCCATCCTGAC	10	24	34375	minus	0.0264978	0.0264978	0.0264978	chr1_161500191_161500214	chr1_161500191_161500214	181.167	0.0897428	0.172893	0.257955	0.611529	0.853531	0.00371702	0.471466	0.0104598	-0.418606	0.0224296	0.0170265
chr1_161500106_161500223	chr1_161500193_161500214	TAGACCGCTCGGCCATCCTGAC	10	22	50714	minus	0.105456	0.105456	0.105456	chr1_161500193_161500214	chr1_161500193_161500214	260.387	-0.0447406	0.0884	0.26086	0.60953	0.853531	0.0424087	0.168032	0.883573	-0.0123134	0.0170836	0.0094945
chr1_161500106_161500223	chr1_161500194_161500214	AGACCGCTCGGCCATCCTGAC	10	21	13537	minus	0.144598	0.144598	0.144598	chr1_161500194_161500214	chr1_161500194_161500214	67.6756	-0.287318	0.0888585	10.4733	0.00121112	0.0395947	0.219591	0.102857	0.200707	-0.108309	0.117447	0.00629945
chr1_161500106_161500223	chr1_161500195_161500214	GACCGCTCGGCCATCCTGAC	10	20	10527	minus	0.0440442	0.0440442	0.0291528	chr1_161500195_161500214	chr1_161500195_161500214	51.8857	-0.0800282	0.0936424	0.714319	0.398014	0.739147	0.417007	0.0724876	0.338368	-0.0852608	0.0146119	0.0100994
chr1_162312346_162312372	chr1_162312348_162312369	AAAGATGAGCTCATTGTAATAT	1	22	1320	plus	NA	0.0981848	Inf	hsa-mir-556	chr1_162312348_162312369	6.87128	-0.476753	0.249453	3.44909	0.0632867	0.328771	0.979341	0.0061716	0.419257	-0.193667	0.796454	-0.00287555
chr1_162312346_162312372	chr1_162312351_162312369	GATGAGCTCATTGTAATAT	1	19	704	plus	0.0472828	0.0472828	0.0472828	hsa-mir-556	chr1_162312351_162312369	3.43528	-0.260222	0.289857	0.816435	0.366225	NA	0.352806	-0.253654	0.349443	0.267049	0.964751	0.000587291
chr1_162312346_162312372	chr1_162312351_162312370	GATGAGCTCATTGTAATATG	1	20	5621	plus	0.244916	0.244916	0.244916	hsa-mir-556	chr1_162312351_162312370	28.2315	-0.0734181	0.134673	0.308459	0.578627	0.840044	0.968135	-0.00511238	0.946477	0.00870372	0.314467	-0.00631855
chr1_162312346_162312372	chr1_162312351_162312371	GATGAGCTCATTGTAATATGA	1	21	27402	plus	0.213111	0.213111	0.213111	hsa-mir-556	chr1_162312351_162312371	140.652	-0.409487	0.129099	10.2633	0.00135701	0.0423144	0.628007	-0.0589494	0.249536	0.142251	0.730929	0.00201094
chr1_162312346_162312372	chr1_162312351_162312372	GATGAGCTCATTGTAATATGAG	1	22	1244	plus	0.0748442	0.0748442	0.0748442	hsa-mir-556	chr1_162312351_162312372	6.20692	-0.473523	0.286922	2.71919	0.0991482	0.40744	0.428573	0.22077	0.453438	0.206143	0.329995	-0.0128414
chr1_162312346_162312372	chr1_162312352_162312371	ATGAGCTCATTGTAATATGA	1	20	974	plus	0.124618	0.124618	0.124618	hsa-mir-556	chr1_162312352_162312371	5.14023	-0.480923	0.260466	3.21187	0.0731057	0.352667	0.210174	0.311526	0.162684	0.352121	0.803832	0.00307391
chr1_167683928_167684100	chr1_167683962_167683979	GGCTCGTTGGTCTAGGGG	22	18	25420	plus	0.273456	0.273456	0.273456	chr1_167683962_167683979	chr1_167683962_167683979	118.876	0.258849	0.122167	4.52344	0.0334336	0.234065	0.0148842	-0.284235	0.0934955	0.195212	0.728004	-0.00190216
chr1_167683928_167684100	chr1_167683962_167683980	GGCTCGTTGGTCTAGGGGT	22	19	34885	plus	0.190639	0.190639	0.190639	chr1_167683962_167683980	chr1_167683962_167683980	168.46	0.0986325	0.0854494	1.33714	0.247538	0.61475	0.604694	-0.0418537	0.549919	0.0484564	0.423584	0.00307392
chr1_167683928_167684100	chr1_167683962_167683981	GGCTCGTTGGTCTAGGGGTA	21	20	67462	plus	0.315335	0.315335	0.263175	chr1_167683962_167683981	chr1_167683962_167683981	330.599	0.111684	0.0873875	1.63897	0.200467	0.559708	0.0895734	0.139652	0.822563	-0.0185803	0.00881554	0.010337
chr1_167683928_167684100	chr1_167683962_167683982	GGCTCGTTGGTCTAGGGGTAT	21	21	36217	plus	0.437371	0.437371	0.276543	chr1_167683962_167683982	chr1_167683962_167683982	180.357	0.0572296	0.105575	0.29259	0.588566	0.844553	0.000381968	0.351847	0.349212	-0.0934378	0.0912163	0.00816507
chr1_167683928_167684100	chr1_167683962_167683984	GGCTCGTTGGTCTAGGGGTATGA	21	23	24301	plus	0.340669	0.340669	0.307716	chr1_167683962_167683984	chr1_167683962_167683984	119.69	-0.0262027	0.102484	0.0655169	0.79798	0.934026	0.00528758	0.269275	0.485873	-0.0675678	0.0558751	0.00876305
chr1_167683928_167684100	chr1_167683962_167683985	GGCTCGTTGGTCTAGGGGTATGAT	21	24	54925	plus	0.31338	0.31338	0.244426	chr1_167683962_167683985	chr1_167683962_167683985	271.525	-0.00699352	0.101813	0.00469425	0.945376	0.980488	0.000781499	0.322891	0.394539	-0.0825037	0.0213989	0.0104669
chr1_167683928_167684100	chr1_167683962_167683986	GGCTCGTTGGTCTAGGGGTATGATT	20	25	30758	plus	0.156215	0.156215	0.143959	chr1_167683962_167683986	chr1_167683962_167683986	148.212	0.107266	0.121345	0.751796	0.385908	0.730267	0.272554	0.126016	0.987444	-0.00180866	0.674697	-0.00232331
chr1_167683928_167684100	chr1_167683962_167683987	GGCTCGTTGGTCTAGGGGTATGATTC	20	26	59246	plus	0.171099	0.171099	0.171099	chr1_167683962_167683987	chr1_167683962_167683987	284.531	0.00652574	0.109183	0.00353933	0.95256	0.982558	0.358417	0.09459	0.60674	-0.053385	0.0436674	0.0097819
chr1_167683928_167684100	chr1_167683962_167683991	GGCTCGTTGGTCTAGGGGTATGATTCTCGC	19	30	103705	plus	0.678792	0.678792	0.678792	chr1_167683962_167683991	chr1_167683962_167683991	494.366	-0.0193379	0.101401	0.0365931	0.848296	0.953811	0.181169	0.127814	0.944439	0.00677175	0.00259029	0.0132968
chr1_167683928_167684100	chr1_167683962_167683992	GGCTCGTTGGTCTAGGGGTATGATTCTCGCT	19	31	66604	plus	0.678792	0.678792	0.678792	chr1_167683962_167683992	chr1_167683962_167683992	316.453	-0.111532	0.0972368	1.32546	0.249615	0.615175	0.0697711	0.165461	0.376664	0.0820754	0.00232006	0.0131097
chr1_167683928_167684100	chr1_167683968_167683985	TTGGTCTAGGGGTATGAT	23	18	23454	plus	0.353331	0.353331	0.353331	chr1_167683968_167683985	chr1_167683968_167683985	109.744	0.0732603	0.126746	0.345177	0.556856	0.827572	0.155123	-0.170143	0.0815039	0.210326	0.969657	-0.000214621
chr1_167683928_167684100	chr1_167683968_167683990	TTGGTCTAGGGGTATGATTCTCG	20	23	19307	plus	0.245353	0.233255	0.156063	chr1_167683968_167683990	chr1_167683968_167683990	95.4072	-0.0636745	0.0880825	0.522788	0.469655	0.781021	0.0289407	0.180995	0.377991	0.0738837	0.0258345	0.00887974
chr1_167683928_167684100	chr1_167683968_167683991	TTGGTCTAGGGGTATGATTCTCGC	19	24	90661	plus	0.473265	0.435513	0.470297	chr1_167683968_167683991	chr1_167683968_167683991	446.879	-0.226191	0.085645	6.96435	0.00831496	0.115069	0.553665	0.0476347	0.908133	-0.00938173	0.000729427	0.0127892
chr1_167683928_167684100	chr1_167683968_167683992	TTGGTCTAGGGGTATGATTCTCGCT	19	25	30561	plus	0.391766	0.359913	0.373081	chr1_167683968_167683992	chr1_167683968_167683992	147.491	-0.243771	0.106099	5.38593	0.0202998	0.180768	0.513867	0.0651532	0.177335	0.136466	0.0210476	0.0109546
chr1_167683928_167684100	chr1_167683969_167683987	TGGTCTAGGGGTATGATTC	21	19	31890	plus	NA	NA	0.261855	chr1_167683969_167683987	chr1_167683969_167683987	150.443	0.0296297	0.108865	0.0748809	0.784358	0.92854	0.460049	-0.0758893	0.369405	0.092615	0.292836	0.00517089
chr1_167683928_167684100	chr1_167683969_167683991	TGGTCTAGGGGTATGATTCTCGC	19	23	82885	plus	0.446302	0.446302	0.446302	chr1_167683969_167683991	chr1_167683969_167683991	405.816	-0.233302	0.0970332	5.7949	0.0160728	0.160188	0.123322	0.13999	0.606459	0.047452	0.00640424	0.0119291
chr1_167683928_167684100	chr1_167683969_167683992	TGGTCTAGGGGTATGATTCTCGCT	19	24	33173	plus	0.48028	0.48028	0.467743	chr1_167683969_167683992	chr1_167683969_167683992	162.64	-0.202772	0.0997867	4.0889	0.0431657	0.270284	0.830304	0.0201325	0.777812	0.026781	0.00296193	0.0132359
chr1_167683928_167684100	chr1_167683970_167683991	GGTCTAGGGGTATGATTCTCGC	19	22	28298	plus	0.473562	0.360804	0.473562	chr1_167683970_167683991	chr1_167683970_167683991	138.554	-0.244176	0.0962369	6.47168	0.0109607	0.130775	0.231227	0.10806	0.514426	0.0594638	0.0463435	0.00854801
chr1_167683928_167684100	chr1_167683970_167683992	GGTCTAGGGGTATGATTCTCGCT	19	23	14474	plus	0.357456	0.322976	0.356707	chr1_167683970_167683992	chr1_167683970_167683992	70.782	-0.254177	0.106057	5.642	0.0175351	0.166435	0.537015	0.0611797	0.155008	0.143849	0.000803576	0.0163855
chr1_167683928_167684100	chr1_167683995_167684015	GGGTGCGAGAGGTCCCGGGTT	17	21	16466	plus	0.155912	0.155912	0.121496	chr1_167683995_167684015	chr1_167683995_167684015	79.965	-0.0729552	0.119618	0.367854	0.544176	0.821726	0.521621	0.071869	0.728164	0.0395453	0.145008	0.00798056
chr1_167683928_167684100	chr1_167683996_167684014	GGTGCGAGAGGTCCCGGGT	17	19	21232	plus	0.125972	0.125972	0.102363	chr1_167683996_167684014	chr1_167683996_167684014	103.637	0.0567236	0.104259	0.295177	0.586922	0.84341	0.809105	0.0237945	0.654896	0.0441587	0.0220324	0.0102944
chr1_167683928_167684100	chr1_167683996_167684015	GGTGCGAGAGGTCCCGGGTT	17	20	40479	plus	0.216589	0.216589	0.161637	chr1_167683996_167684015	chr1_167683996_167684015	197.063	0.183289	0.111327	2.628	0.104994	0.418356	0.912627	0.0114611	0.769103	0.0309945	0.649792	0.0023164
chr1_167684695_167684823	chr1_167684743_167684762	AACCCGGGACCTCTCGCACC	17	20	40479	minus	0.215513	0.215513	0.161637	chr1_167684743_167684762	chr1_167684743_167684762	197.063	0.183289	0.111327	2.628	0.104994	0.418356	0.912627	0.0114611	0.769103	0.0309945	0.649792	0.0023164
chr1_167684695_167684823	chr1_167684743_167684763	AACCCGGGACCTCTCGCACCC	17	21	16466	minus	0.152229	0.152229	0.121496	chr1_167684743_167684763	chr1_167684743_167684763	79.965	-0.0729552	0.119618	0.367854	0.544176	0.821726	0.521621	0.071869	0.728164	0.0395453	0.145008	0.00798056
chr1_167684695_167684823	chr1_167684744_167684762	ACCCGGGACCTCTCGCACC	17	19	21232	minus	0.125972	0.125972	0.102363	chr1_167684744_167684762	chr1_167684744_167684762	103.637	0.0567236	0.104259	0.295177	0.586922	0.84341	0.809105	0.0237945	0.654896	0.0441587	0.0220324	0.0102944
chr1_167684695_167684823	chr1_167684766_167684788	AGCGAGAATCATACCCCTAGACC	19	23	14474	minus	0.356707	0.311728	0.356707	chr1_167684766_167684788	chr1_167684766_167684788	70.782	-0.254177	0.106057	5.642	0.0175351	0.166435	0.537015	0.0611797	0.155008	0.143849	0.000803576	0.0163855
chr1_167684695_167684823	chr1_167684766_167684789	AGCGAGAATCATACCCCTAGACCA	19	24	33173	minus	0.467743	0.467743	0.467743	chr1_167684766_167684789	chr1_167684766_167684789	162.64	-0.202772	0.0997867	4.0889	0.0431657	0.270284	0.830304	0.0201325	0.777812	0.026781	0.00296193	0.0132359
chr1_167684695_167684823	chr1_167684766_167684790	AGCGAGAATCATACCCCTAGACCAA	19	25	30561	minus	0.373081	0.346599	0.373081	chr1_167684766_167684790	chr1_167684766_167684790	147.491	-0.243771	0.106099	5.38593	0.0202998	0.180768	0.513867	0.0651532	0.177335	0.136466	0.0210476	0.0109546
chr1_167684695_167684823	chr1_167684766_167684796	AGCGAGAATCATACCCCTAGACCAACGAGCC	19	31	66604	minus	0.678792	0.678792	0.678792	chr1_167684766_167684796	chr1_167684766_167684796	316.453	-0.111532	0.0972368	1.32546	0.249615	0.615175	0.0697711	0.165461	0.376664	0.0820754	0.00232006	0.0131097
chr1_167684695_167684823	chr1_167684767_167684788	GCGAGAATCATACCCCTAGACC	19	22	28298	minus	0.476749	0.361308	0.473562	chr1_167684767_167684788	chr1_167684767_167684788	138.554	-0.244176	0.0962369	6.47168	0.0109607	0.130775	0.231227	0.10806	0.514426	0.0594638	0.0463435	0.00854801
chr1_167684695_167684823	chr1_167684767_167684789	GCGAGAATCATACCCCTAGACCA	19	23	82885	minus	0.446759	0.446759	0.446302	chr1_167684767_167684789	chr1_167684767_167684789	405.816	-0.233302	0.0970332	5.7949	0.0160728	0.160188	0.123322	0.13999	0.606459	0.047452	0.00640424	0.0119291
chr1_167684695_167684823	chr1_167684767_167684790	GCGAGAATCATACCCCTAGACCAA	19	24	90661	minus	0.470297	0.433437	0.470297	chr1_167684767_167684790	chr1_167684767_167684790	446.879	-0.226191	0.085645	6.96435	0.00831496	0.115069	0.553665	0.0476347	0.908133	-0.00938173	0.000729427	0.0127892
chr1_167684695_167684823	chr1_167684767_167684796	GCGAGAATCATACCCCTAGACCAACGAGCC	19	30	103705	minus	0.678792	0.678792	0.678792	chr1_167684767_167684796	chr1_167684767_167684796	494.366	-0.0193379	0.101401	0.0365931	0.848296	0.953811	0.181169	0.127814	0.944439	0.00677175	0.00259029	0.0132968
chr1_167684695_167684823	chr1_167684768_167684790	CGAGAATCATACCCCTAGACCAA	20	23	19307	minus	0.256955	0.24601	0.156063	chr1_167684768_167684790	chr1_167684768_167684790	95.4072	-0.0636745	0.0880825	0.522788	0.469655	0.781021	0.0289407	0.180995	0.377991	0.0738837	0.0258345	0.00887974
chr1_167684695_167684823	chr1_167684771_167684789	GAATCATACCCCTAGACCA	21	19	31890	minus	0.353331	0.353331	0.261855	chr1_167684771_167684789	chr1_167684771_167684789	150.443	0.0296297	0.108865	0.0748809	0.784358	0.92854	0.460049	-0.0758893	0.369405	0.092615	0.292836	0.00517089
chr1_167684695_167684823	chr1_167684771_167684796	GAATCATACCCCTAGACCAACGAGCC	20	26	59246	minus	0.278845	0.278845	0.171099	chr1_167684771_167684796	chr1_167684771_167684796	284.531	0.00652574	0.109183	0.00353933	0.95256	0.982558	0.358417	0.09459	0.60674	-0.053385	0.0436674	0.0097819
chr1_167684695_167684823	chr1_167684772_167684796	AATCATACCCCTAGACCAACGAGCC	20	25	30758	minus	0.143959	0.143959	0.143959	chr1_167684772_167684796	chr1_167684772_167684796	148.212	0.107266	0.121345	0.751796	0.385908	0.730267	0.272554	0.126016	0.987444	-0.00180866	0.674697	-0.00232331
chr1_167684695_167684823	chr1_167684773_167684790	ATCATACCCCTAGACCAA	23	18	23454	minus	NA	NA	0.353331	chr1_167684773_167684790	chr1_167684773_167684790	109.744	0.0732603	0.126746	0.345177	0.556856	0.827572	0.155123	-0.170143	0.0815039	0.210326	0.969657	-0.000214621
chr1_167684695_167684823	chr1_167684773_167684796	ATCATACCCCTAGACCAACGAGCC	21	24	54925	minus	0.244426	0.244426	0.244426	chr1_167684773_167684796	chr1_167684773_167684796	271.525	-0.00699352	0.101813	0.00469425	0.945376	0.980488	0.000781499	0.322891	0.394539	-0.0825037	0.0213989	0.0104669
chr1_167684695_167684823	chr1_167684774_167684796	TCATACCCCTAGACCAACGAGCC	21	23	24301	minus	0.390128	0.390128	0.307716	chr1_167684774_167684796	chr1_167684774_167684796	119.69	-0.0262027	0.102484	0.0655169	0.79798	0.934026	0.00528758	0.269275	0.485873	-0.0675678	0.0558751	0.00876305
chr1_167684695_167684823	chr1_167684775_167684796	CATACCCCTAGACCAACGAGCC	21	22	13488	minus	0.0896889	0.0896889	0.0896889	chr1_167684775_167684796	chr1_167684775_167684796	66.0329	0.0238196	0.129502	0.0327401	0.856413	0.956406	0.074236	0.217449	0.117398	-0.192012	0.784843	0.00165587
chr1_167684695_167684823	chr1_167684776_167684796	ATACCCCTAGACCAACGAGCC	21	21	36217	minus	0.276543	0.276543	0.276543	chr1_167684776_167684796	chr1_167684776_167684796	180.357	0.0572296	0.105575	0.29259	0.588566	0.844553	0.000381968	0.351847	0.349212	-0.0934378	0.0912163	0.00816507
chr1_167684695_167684823	chr1_167684777_167684796	TACCCCTAGACCAACGAGCC	21	20	67462	minus	0.263691	0.263691	0.263175	chr1_167684777_167684796	chr1_167684777_167684796	330.599	0.111684	0.0873875	1.63897	0.200467	0.559708	0.0895734	0.139652	0.822563	-0.0185803	0.00881554	0.010337
chr1_167684695_167684823	chr1_167684778_167684796	ACCCCTAGACCAACGAGCC	22	19	34885	minus	0.272999	0.272999	0.190639	chr1_167684778_167684796	chr1_167684778_167684796	168.46	0.0986325	0.0854494	1.33714	0.247538	0.61475	0.604694	-0.0418537	0.549919	0.0484564	0.423584	0.00307392
chr1_167684695_167684823	chr1_167684779_167684796	CCCCTAGACCAACGAGCC	22	18	25420	minus	0.559212	0.559212	0.273456	chr1_167684779_167684796	chr1_167684779_167684796	118.876	0.258849	0.122167	4.52344	0.0334336	0.234065	0.0148842	-0.284235	0.0934955	0.195212	0.728004	-0.00190216
chr1_172107950_172107982	chr1_172107956_172107977	ACTGCCTGTCTGTGCCTGCTGT	1	22	39755	minus	0.437566	0.437566	0.437566	hsa-mir-214;hsa-mir-3120	chr1_172107956_172107977	197.286	-0.322086	0.153194	4.13973	0.0418878	0.267964	0.401934	-0.122135	0.114034	-0.232787	0.558911	-0.00377233
chr1_172107950_172107982	chr1_172107956_172107978	ACTGCCTGTCTGTGCCTGCTGTA	1	23	17862	minus	0.456597	0.456597	0.456597	hsa-mir-214;hsa-mir-3120	chr1_172107956_172107978	88.3266	-0.0282959	0.148637	0.0332932	0.855218	0.956062	0.816373	-0.0329727	0.0147422	-0.349841	0.27988	-0.00685734
chr1_172107950_172107982	chr1_172107957_172107977	CTGCCTGTCTGTGCCTGCTGT	1	21	8599	minus	0.290706	0.290706	0.290706	hsa-mir-214;hsa-mir-3120	chr1_172107957_172107977	41.5754	-0.323948	0.151579	4.26639	0.0388734	0.257059	0.485091	-0.10234	0.0495347	-0.283957	0.961715	-0.000330929
chr1_172107950_172107982	chr1_172107957_172107978	CTGCCTGTCTGTGCCTGCTGTA	1	22	2094	minus	0.137223	0.137223	0.137223	hsa-mir-214;hsa-mir-3120	chr1_172107957_172107978	10.2875	-0.271553	0.219882	1.48933	0.222321	0.589126	0.714267	0.0770044	0.0293296	-0.463806	0.929026	-0.000875219
chr1_172107950_172107982	chr1_172107958_172107977	TGCCTGTCTGTGCCTGCTGT	1	20	5432	minus	0.17142	0.157404	0.17142	hsa-mir-214;hsa-mir-3120	chr1_172107958_172107977	26.9278	-0.21721	0.168016	1.56667	0.210692	0.571775	0.672094	0.0683351	0.0152911	-0.391944	0.161729	-0.0101946
chr1_172107950_172107982	chr1_172107958_172107978	TGCCTGTCTGTGCCTGCTGTA	1	21	4208	minus	0.122162	0.122162	0.122162	hsa-mir-214;hsa-mir-3120	chr1_172107958_172107978	20.529	-0.302806	0.177729	2.78962	0.0948769	0.399538	0.41512	0.138988	0.0261715	-0.379739	0.977678	0.000217051
chr1_172107950_172107982	chr1_172107959_172107977	GCCTGTCTGTGCCTGCTGT	2	19	2772	minus	0.0874965	0.0741095	0.0874965	hsa-mir-214;hsa-mir-3120	chr1_172107959_172107977	13.0686	-0.168382	0.18131	0.834307	0.36103	0.715449	0.192585	-0.226847	0.815891	-0.0400852	0.203258	-0.0101411
chr1_172107950_172107982	chr1_172107959_172107978	GCCTGTCTGTGCCTGCTGTA	1	20	8138	minus	0.140816	0.140816	0.140816	hsa-mir-214;hsa-mir-3120	chr1_172107959_172107978	39.7801	-0.00155997	0.158017	8.42571e-05	0.992676	0.99754	0.161683	-0.216515	0.437385	-0.118845	0.0760703	-0.0125735
chr1_172107950_172107982	chr1_172107960_172107977	CCTGTCTGTGCCTGCTGT	2	18	1118	minus	0.117709	0.0899349	0.117709	hsa-mir-214;hsa-mir-3120	chr1_172107960_172107977	5.2685	-0.197278	0.2589	0.535034	0.464498	0.778641	0.280813	-0.269958	0.495022	0.17018	0.328856	-0.0114651
chr1_172107950_172107982	chr1_172107960_172107978	CCTGTCTGTGCCTGCTGTA	1	19	3700	minus	0.0947826	0.0947826	0.0947826	hsa-mir-214;hsa-mir-3120	chr1_172107960_172107978	17.5474	-0.0371359	0.175525	0.0420317	0.837559	0.949253	0.218664	-0.208626	0.438541	-0.129305	0.512172	-0.00525019
chr1_172107950_172107982	chr1_172107960_172107979	CCTGTCTGTGCCTGCTGTAC	1	20	1917	minus	0.000534288	0.000275285	0.000534288	hsa-mir-214;hsa-mir-3120	chr1_172107960_172107979	9.49642	-0.0388964	0.21172	0.0313298	0.859507	0.956995	0.156152	-0.282106	0.89363	-0.0274926	0.764636	-0.00274619
chr1_172107994_172108041	chr1_172107997_172108017	GCACAGCAAGTGTAGACAGGC	1	21	8789	plus	0.219302	0.219302	0.219302	hsa-mir-214;hsa-mir-3120	chr1_172107997_172108017	43.896	-0.324731	0.124731	6.78528	0.00919127	0.12175	0.443903	0.0904381	0.662432	0.0520802	0.768736	0.00168986
chr1_172107994_172108041	chr1_172107997_172108018	GCACAGCAAGTGTAGACAGGCA	1	22	15182	plus	0.321064	0.314846	0.321064	hsa-mir-214;hsa-mir-3120	chr1_172107997_172108018	77.0857	-0.402048	0.126378	10.2218	0.00138789	0.0428173	0.944443	0.00827894	0.975681	0.0036781	0.211036	0.0071972
chr1_172107994_172108041	chr1_172107998_172108017	CACAGCAAGTGTAGACAGGC	1	20	17039	plus	0.345905	0.345905	0.345905	hsa-mir-214;hsa-mir-3120	chr1_172107998_172108017	86.0487	-0.182586	0.12126	2.28202	0.130882	0.470559	0.591608	0.0610318	0.782289	0.0319545	0.378549	0.00496392
chr1_172107994_172108041	chr1_172107998_172108018	CACAGCAAGTGTAGACAGGCA	1	21	15803	plus	0.369765	0.369765	0.369765	hsa-mir-214;hsa-mir-3120	chr1_172107998_172108018	80.0232	-0.370819	0.127725	8.35361	0.00384922	0.076803	0.802587	-0.0300325	0.426086	-0.0966421	0.427416	0.00459622
chr1_172107994_172108041	chr1_172107998_172108019	CACAGCAAGTGTAGACAGGCAG	1	22	2317	plus	0.135203	0.131723	0.135203	hsa-mir-214;hsa-mir-3120	chr1_172107998_172108019	11.4037	-0.393298	0.197588	3.77158	0.0521304	0.296717	0.834802	0.0387904	0.520119	-0.120075	0.252558	0.0101659
chr1_172107994_172108041	chr1_172107999_172108020	ACAGCAAGTGTAGACAGGCAGA	1	22	2125	plus	0.0906451	0.0906451	0.0906451	hsa-mir-214;hsa-mir-3120	chr1_172107999_172108020	10.4474	-0.392519	0.203456	3.6685	0.0554501	0.305321	0.122528	0.2947	0.954791	-0.0110054	0.650904	0.00413897
chr1_172107994_172108041	chr1_172107999_172108021	ACAGCAAGTGTAGACAGGCAGAC	1	23	2667	plus	0.0626031	0.0626031	0.0626031	hsa-mir-214;hsa-mir-3120	chr1_172107999_172108021	13.5823	-0.293337	0.200062	2.24353	0.134175	0.473021	0.451253	0.142384	0.916442	0.0200972	0.988646	-0.000132562
chr1_172107994_172108041	chr1_172108000_172108021	CAGCAAGTGTAGACAGGCAGAC	1	22	1374	plus	0.0459281	0.0459281	0.0459281	hsa-mir-214;hsa-mir-3120	chr1_172108000_172108021	6.90991	-0.100651	0.241265	0.178611	0.67257	0.881506	0.883403	0.0342713	0.982716	-0.00521108	0.991203	0.000117587
chr1_172113691_172113763	chr1_172113694_172113715	TAACCAATGTGCAGACTACTGT	3	22	1898789	minus	0.76134	0.76134	0.76134	hsa-mir-199a-2	chr1_172113694_172113715	9740.34	-0.384003	0.121587	10.3294	0.00130928	0.0411843	0.714499	0.041554	0.912355	-0.0127821	0.191185	0.00719717
chr1_172113691_172113763	chr1_172113695_172113714	AACCAATGTGCAGACTACTG	3	20	244643	minus	0.732989	0.711897	0.730993	hsa-mir-199a-2	chr1_172113695_172113714	1228.61	-0.223963	0.0855397	7.0361	0.00798828	0.11251	0.563337	-0.0465498	0.483042	-0.0572088	0.719041	0.00139481
chr1_172113691_172113763	chr1_172113695_172113715	AACCAATGTGCAGACTACTGT	3	21	7952596	minus	0.788438	0.788438	0.782382	hsa-mir-199a-2	chr1_172113695_172113715	40542.6	-0.241911	0.104694	5.49105	0.0191141	0.174633	0.609412	0.0502546	0.563205	-0.0578808	0.208803	0.00599362
chr1_172113691_172113763	chr1_172113695_172113716	AACCAATGTGCAGACTACTGTA	3	22	1832003	minus	0.858758	0.852069	0.85823	hsa-mir-199a-2	chr1_172113695_172113716	9399.92	-0.253888	0.114636	5.08903	0.0240777	0.198868	0.390771	0.0924603	0.672856	-0.0463794	0.529763	0.00327368
chr1_172113691_172113763	chr1_172113696_172113715	ACCAATGTGCAGACTACTGT	3	20	168650	minus	0.312029	0.312029	0.312029	hsa-mir-199a-2	chr1_172113696_172113715	842.693	-0.18401	0.0686029	7.21232	0.00724047	0.105515	0.785489	-0.0177362	0.278117	-0.0709848	0.403728	-0.00257182
chr1_172113691_172113763	chr1_172113732_172113754	GAACAGGTAGTCTGAACACTGGG	2	23	778603	minus	1	1	1	hsa-mir-199a-2	chr1_172113732_172113754	4110.14	-0.280881	0.153229	3.34964	0.0672196	0.342286	0.123714	0.221385	0.518565	-0.0946775	0.400167	0.005881
chr1_173836788_173836883	chr1_173836816_173836844	CATCAGAGCGGTTGGCATTCATCATTACT	1	29	3288	minus	1	1	1	U74	chr1_173836816_173836844	14.6234	-0.356264	0.308501	1.24966	0.263618	0.626035	5.87045e-06	1.43822	0.310967	0.323911	0.336344	-0.0117228
chr1_173836788_173836883	chr1_173836833_173836853	TTCATCATTACTCTCAGATGT	1	21	605	minus	1	1	1	U74	chr1_173836833_173836853	2.87808	-0.486218	0.566426	0.712437	0.398636	NA	0.0805808	1.03401	0.706149	0.317598	0.198696	-0.0280281
chr1_173836788_173836883	chr1_173836856_173836881	CTACCAACACAGGCTTCATCAGAGGC	1	26	584	minus	0.394445	0.394445	0.394445	U74	chr1_173836856_173836881	2.41148	-0.659007	0.606971	1.14665	0.284251	NA	0.00532132	1.73116	0.869263	0.151462	0.484168	-0.0192087
chr1_173836788_173836883	chr1_173836857_173836880	TACCAACACAGGCTTCATCAGAGG	1	24	510	minus	0.339471	0.339471	0.339471	U74	chr1_173836857_173836880	2.44978	-0.198583	0.628529	0.113976	0.735662	NA	0.0485534	1.37871	0.29167	-0.789647	0.337809	-0.0290273
chr1_173836788_173836883	chr1_173836857_173836881	TACCAACACAGGCTTCATCAGAGGC	1	25	31307	minus	0.492827	0.492827	0.492827	U74	chr1_173836857_173836881	142.945	-0.308198	0.274257	1.18004	0.277348	0.642866	2.9487e-05	1.14887	0.986863	0.00445347	0.491028	-0.00747861
chr1_173836788_173836883	chr1_173836858_173836881	ACCAACACAGGCTTCATCAGAGGC	1	24	5847	minus	0.508221	0.508221	0.508221	U74	chr1_173836858_173836881	27.5092	-0.596616	0.26176	5.22843	0.0222206	0.190006	7.55319e-05	1.03218	0.605151	0.139028	0.519179	0.00701357
chr1_175937532_175937631	chr1_175937574_175937594	AAGCCAGACAGAGACCTCCAT	1	21	9998	minus	0.326441	0.31114	0.326441	HBI-100	chr1_175937574_175937594	51.389	-0.157104	0.134385	1.41969	0.233454	0.602988	0.37798	0.112637	0.155282	0.184051	0.923627	-0.000578046
chr1_175937532_175937631	chr1_175937574_175937595	AAGCCAGACAGAGACCTCCATA	1	22	172653	minus	0.272663	0.272663	0.272663	HBI-100	chr1_175937574_175937595	886.8	-0.308639	0.122948	6.45153	0.0110857	0.131198	0.36878	0.104231	0.0635723	0.219292	0.242824	0.00660592
chr1_175937532_175937631	chr1_175937574_175937596	AAGCCAGACAGAGACCTCCATAT	1	23	5045	minus	0.271811	0.267421	0.271811	HBI-100	chr1_175937574_175937596	26.1104	-0.156831	0.15792	0.995586	0.318381	0.68109	0.733694	0.0505035	0.34256	0.143596	0.577112	0.00401085
chr1_175937532_175937631	chr1_175937575_175937595	AGCCAGACAGAGACCTCCATA	1	21	72213	minus	0.255646	0.255646	0.255646	HBI-100	chr1_175937575_175937595	374.402	-0.216554	0.0831036	6.86164	0.00880657	0.119367	0.0319062	0.168921	0.0291235	0.174205	0.129136	0.00561237
chr1_175937532_175937631	chr1_175937575_175937596	AGCCAGACAGAGACCTCCATAT	1	22	21306	minus	0.368784	0.36382	0.368784	HBI-100	chr1_175937575_175937596	109.346	-0.245828	0.12144	4.1744	0.041039	0.264762	0.551208	0.0683031	0.0744722	0.208695	0.466253	0.00390654
chr1_175937532_175937631	chr1_175937576_175937595	GCCAGACAGAGACCTCCATA	1	20	8388	minus	0.235876	0.235876	0.235876	HBI-100	chr1_175937576_175937595	43.0838	-0.0780044	0.114588	0.466802	0.494462	0.793563	0.278536	0.117772	0.177859	0.148142	0.142879	0.00746166
chr1_175937532_175937631	chr1_175937576_175937596	GCCAGACAGAGACCTCCATAT	1	21	13297	minus	0.311809	0.311809	0.311809	HBI-100	chr1_175937576_175937596	67.6571	-0.20142	0.103459	3.86838	0.0492041	0.285637	0.040886	0.199883	0.0153373	0.242448	0.0394973	0.00926371
chr1_175937532_175937631	chr1_175937577_175937595	CCAGACAGAGACCTCCATA	1	19	6055	minus	0.0828567	0.0828567	0.0828567	HBI-100	chr1_175937577_175937595	31.6441	-0.232873	0.168799	1.87191	0.171256	0.521203	0.175353	0.220223	0.0672137	0.303574	0.0992073	0.0124421
chr1_179064539_179064578	chr1_179064547_179064561	TGGAGGTCCCACCGA	1	15	3700	minus	0.569721	0.32845	0.569721	chr1_179064547_179064561	chr1_179064547_179064561	17.2932	0.350423	0.192979	3.19301	0.0739539	0.354359	0.0177509	-0.449465	0.0963303	0.31219	0.754772	-0.00287545
chr1_179064539_179064578	chr1_179064547_179064562	TGGAGGTCCCACCGAG	1	16	20505	minus	0.74196	0.584863	0.74196	chr1_179064547_179064562	chr1_179064547_179064562	95.5704	0.201254	0.165799	1.45747	0.227333	0.595834	0.0319213	-0.344257	0.290465	0.168262	0.0965831	-0.0130487
chr1_179064539_179064578	chr1_179064547_179064563	TGGAGGTCCCACCGAGA	1	17	35928	minus	0.788284	0.721603	0.788284	chr1_179064547_179064563	chr1_179064547_179064563	166.387	-0.0269388	0.154085	0.0305427	0.861265	0.957942	0.0104193	-0.380489	0.618112	0.0737345	0.242989	-0.00832404
chr1_179064539_179064578	chr1_179064547_179064564	TGGAGGTCCCACCGAGAT	1	18	99238	minus	0.650178	0.632378	0.650178	chr1_179064547_179064564	chr1_179064547_179064564	465.745	0.139556	0.114761	1.42936	0.231869	0.601704	0.00019591	-0.412876	0.0957307	0.182882	0.155127	-0.00744485
chr1_179064539_179064578	chr1_179064547_179064565	TGGAGGTCCCACCGAGATA	1	19	9296	minus	0.304385	0.262063	0.304385	chr1_179064547_179064565	chr1_179064547_179064565	44.3587	0.0246593	0.101766	0.0581993	0.809365	0.937957	0.000840679	-0.32192	0.477843	0.0686882	0.683417	0.0018903
chr1_179064539_179064578	chr1_179064548_179064563	GGAGGTCCCACCGAGA	2	16	2598	minus	0.369967	0.347485	0.369967	chr1_179064548_179064563	chr1_179064548_179064563	12.1552	-0.108025	0.255369	0.180549	0.670901	0.880894	0.711941	0.0953718	0.689279	-0.105149	0.842248	0.00241861
chr1_179064539_179064578	chr1_179064548_179064564	GGAGGTCCCACCGAGAT	2	17	2495	minus	0.435539	0.436024	0.435539	chr1_179064548_179064564	chr1_179064548_179064564	11.3054	-0.0111532	0.184784	0.00345957	0.953097	0.982558	0.0124377	-0.462176	0.421223	-0.144284	0.956621	-0.000478803
chr1_190612337_190612387	chr1_190612359_190612383	GCGCTACCTACTGCGCTAACGAGGC	2	25	48043	minus	0.339533	0.339533	0.339533	chr1_190612359_190612383	chr1_190612359_190612383	226.707	0.0731312	0.122951	0.318274	0.572646	0.836127	0.320779	-0.114885	0.235608	-0.138069	0.891292	-0.00075971
chr1_190612337_190612387	chr1_190612360_190612383	CGCTACCTACTGCGCTAACGAGGC	2	24	75724	minus	0.278916	0.278916	0.278916	chr1_190612360_190612383	chr1_190612360_190612383	365.383	0.0479934	0.0970081	0.232442	0.629719	0.858348	0.187773	-0.119995	0.334499	-0.0886438	0.587759	0.00240492
chr1_190612337_190612387	chr1_190612361_190612383	GCTACCTACTGCGCTAACGAGGC	2	23	7852	minus	0.132159	0.132159	0.132159	chr1_190612361_190612383	chr1_190612361_190612383	37.2345	-0.15266	0.12872	1.34614	0.245955	0.614682	0.229032	-0.144793	0.724156	-0.0430372	0.300641	-0.00590202
chr1_190612337_190612387	chr1_190612362_190612383	CTACCTACTGCGCTAACGAGGC	2	22	7508	minus	0.129079	0.129079	0.129079	chr1_190612362_190612383	chr1_190612362_190612383	37.0697	-0.24284	0.119466	3.9834	0.0459508	0.277519	0.213464	-0.140509	0.99897	0.000143807	0.606015	0.0027628
chr1_190612337_190612387	chr1_190612363_190612383	TACCTACTGCGCTAACGAGGC	2	21	60476	minus	0.206408	0.206408	0.206408	chr1_190612363_190612383	chr1_190612363_190612383	296.288	-0.0513487	0.0870876	0.332023	0.56447	0.832061	0.105773	-0.133149	0.724471	-0.0291031	0.937277	0.000314384
chr1_190612337_190612387	chr1_190612365_190612383	CCTACTGCGCTAACGAGGC	3	19	101586	minus	0.420139	0.420139	0.420139	chr1_190612365_190612383	chr1_190612365_190612383	488.092	0.0726315	0.082937	0.748456	0.386966	0.730347	3.74461e-05	-0.326246	0.0409841	0.161793	0.176386	-0.00513748
chr1_190612337_190612387	chr1_190612366_190612383	CTACTGCGCTAACGAGGC	3	18	10004	minus	0.476768	0.476768	0.476768	chr1_190612366_190612383	chr1_190612366_190612383	46.4319	-0.139659	0.129584	1.10817	0.29248	0.657042	0.00131522	-0.399797	0.0448885	0.248857	0.22335	-0.0071754
chr1_190612337_190612387	chr1_190612367_190612383	TACTGCGCTAACGAGGC	3	17	4301	minus	0.440547	0.440547	0.440547	chr1_190612367_190612383	chr1_190612367_190612383	19.2844	0.112424	0.162031	0.478673	0.489024	0.791635	6.56938e-05	-0.617662	0.14847	0.223162	0.0179755	-0.0177743
chr1_194871249_194871276	chr1_194871254_194871268	ACTCTGCCACCTCTC	28	15	3590	minus	0.712101	0.712101	0.712101	chr1_194871254_194871268	chr1_194871254_194871268	16.3832	1.3811	0.304709	16.8401	4.06649e-05	0.00510635	0.166974	-0.424592	0.0038513	0.908927	0.312134	-0.0153268
chr1_194871249_194871276	chr1_194871254_194871269	ACTCTGCCACCTCTCC	6	16	192988	minus	0.814295	0.814295	0.805125	chr1_194871254_194871269	chr1_194871254_194871269	843.538	1.32358	0.29172	17.6834	2.609e-05	0.00435576	0.102501	-0.474066	0.0351215	0.620896	0.0618136	-0.0262114
chr1_194871249_194871276	chr1_194871255_194871269	CTCTGCCACCTCTCC	53	15	41819	minus	0.818188	0.818188	0.799641	chr1_194871255_194871269	chr1_194871255_194871269	189.17	1.03589	0.26815	12.8645	0.000334874	0.0190422	0.0410276	-0.554133	0.00434564	0.765304	0.0998887	-0.0222632
chr1_198828014_198828078	chr1_198828053_198828076	AACCCACCGACAGCAATGAATGTT	2	24	234342	minus	0.495089	0.495089	0.495089	hsa-mir-181b-1	chr1_198828053_198828076	1161.15	-0.214401	0.101538	4.5864	0.0322267	0.230473	0.197695	0.123879	0.454488	-0.0723875	0.455712	-0.00335206
chr1_198828014_198828078	chr1_198828054_198828075	ACCCACCGACAGCAATGAATGT	2	22	54767	minus	0.103779	0.103779	0.028914	hsa-mir-181b-1	chr1_198828054_198828075	283.918	-0.13699	0.112441	1.48562	0.222898	0.590369	0.00113796	0.347343	0.344976	-0.101537	0.111384	0.00781079
chr1_198828014_198828078	chr1_198828054_198828076	ACCCACCGACAGCAATGAATGTT	2	23	207677	minus	0.245585	0.245585	0.245585	hsa-mir-181b-1	chr1_198828054_198828076	1043.61	-0.274428	0.0906582	9.44487	0.0021174	0.0552928	0.176066	0.116095	0.180113	-0.115772	0.859978	0.000705357
chr1_198828014_198828078	chr1_198828055_198828076	CCCACCGACAGCAATGAATGTT	2	22	74829	minus	0.230164	0.230164	0.230164	hsa-mir-181b-1	chr1_198828055_198828076	377.577	-0.218888	0.0922352	5.79516	0.0160704	0.160188	0.52887	0.0549823	0.0787694	-0.154396	0.405335	0.00342222
chr1_198828014_198828078	chr1_198828056_198828075	CCACCGACAGCAATGAATGT	2	20	74326	minus	0.407347	0.407347	0.336145	hsa-mir-181b-1	chr1_198828056_198828075	378.768	-0.0446265	0.0831016	0.290841	0.589682	0.845203	0.00495475	0.221574	0.352638	-0.0736977	0.161539	0.00515933
chr1_198828014_198828078	chr1_198828056_198828076	CCACCGACAGCAATGAATGTT	2	21	1042301	minus	0.360246	0.360246	0.254437	hsa-mir-181b-1	chr1_198828056_198828076	5294.34	-0.118476	0.0740358	2.58872	0.107627	0.423718	0.0260383	0.155839	0.0137675	-0.173048	0.0781604	0.00585505
chr1_198828014_198828078	chr1_198828057_198828076	CACCGACAGCAATGAATGTT	2	20	64160	minus	0.434305	0.434305	0.408548	hsa-mir-181b-1	chr1_198828057_198828076	318.973	-0.0998236	0.0816074	1.49108	0.222049	0.588862	0.0510608	0.151902	0.00134492	-0.247498	0.679775	0.00150446
chr1_198828195_198828264	chr1_198828199_198828219	GTACAATCAACGGTCGATGGT	1	21	272029	minus	1	1	1	hsa-mir-181a-1	chr1_198828199_198828219	1400.69	-0.0289068	0.120525	0.0580196	0.809654	0.937957	0.0969116	0.189317	0.849196	-0.0219094	0.63018	0.0026717
chr1_198828195_198828264	chr1_198828235_198828259	AAACTCACCGACAGCGTTGAATGTT	2	25	357897	minus	0.618436	0.618436	0.618436	hsa-mir-181a-1	chr1_198828235_198828259	1829.81	-0.560137	0.145815	15.079	0.000103106	0.00954422	0.884833	-0.0201758	0.312326	0.141826	0.569522	-0.00379079
chr1_198828195_198828264	chr1_198828236_198828259	AACTCACCGACAGCGTTGAATGTT	2	24	499330	minus	0.710649	0.710649	0.710649	hsa-mir-181a-1	chr1_198828236_198828259	2551.35	-0.509379	0.133617	14.8322	0.000117512	0.0103737	0.733155	-0.0433728	0.369117	0.115235	0.534942	-0.00376608
chr1_198828195_198828264	chr1_198828237_198828259	ACTCACCGACAGCGTTGAATGTT	2	23	6685894	minus	0.127199	0.127199	0.127199	hsa-mir-181a-1	chr1_198828237_198828259	34482.8	-0.401005	0.111505	13.2579	0.000271439	0.0170418	0.564669	0.0608587	0.9124	-0.0117456	0.894285	-0.00066654
chr1_198828195_198828264	chr1_198828238_198828259	CTCACCGACAGCGTTGAATGTT	2	22	1583805	minus	0.415143	0.415143	0.415143	hsa-mir-181a-1	chr1_198828238_198828259	8197.37	-0.315982	0.0979152	10.5285	0.00117548	0.0392497	0.0721998	0.167201	0.109589	-0.1496	0.542321	0.00262937
chr1_198828195_198828264	chr1_198828239_198828259	TCACCGACAGCGTTGAATGTT	2	21	6886434	minus	0.341269	0.341269	0.0830009	hsa-mir-181a-1	chr1_198828239_198828259	35669.5	-0.136579	0.084229	2.61229	0.106039	0.420212	0.0227263	0.182042	0.328017	-0.0784954	0.0377739	0.00784956
chr1_198828195_198828264	chr1_198828240_198828259	CACCGACAGCGTTGAATGTT	2	20	388654	minus	0.650054	0.650054	0.583495	hsa-mir-181a-1	chr1_198828240_198828259	1981.5	-0.164913	0.090186	3.29575	0.0694595	0.347556	0.0901421	0.146383	0.396119	-0.0730585	0.204753	0.00509628
chr1_199662641_199662667	chr1_199662646_199662662	GCAGGATGAAGGCCTTC	2	17	1041	plus	0.533144	0.526341	0.533144	chr1_199662646_199662662	chr1_199662646_199662662	4.24748	1.00173	0.420997	4.88045	0.0271625	NA	0.0395099	-0.890538	0.0330145	0.903227	0.0989446	-0.0386445
chr1_199662641_199662667	chr1_199662646_199662664	GCAGGATGAAGGCCTTCGG	1	19	589	plus	0.570604	0.518094	0.570604	chr1_199662646_199662664	chr1_199662646_199662664	2.49513	0.416586	0.664361	0.364924	0.545784	NA	0.734443	-0.221306	0.170479	0.884973	0.129497	-0.0570324
chr1_199662641_199662667	chr1_199662646_199662665	GCAGGATGAAGGCCTTCGGG	1	20	1134	plus	0.609469	0.550781	0.609469	chr1_199662646_199662665	chr1_199662646_199662665	4.86079	0.8509	0.649181	1.56217	0.211347	0.572374	0.968572	-0.0242558	0.242774	0.734625	0.0380342	-0.0763162
chr1_199662641_199662667	chr1_199662646_199662666	GCAGGATGAAGGCCTTCGGGT	1	21	11190	plus	0.636164	0.721378	0.636164	chr1_199662646_199662666	chr1_199662646_199662666	48.6465	0.811004	0.416567	3.42771	0.064111	0.331481	0.969576	0.0151091	0.0132971	1.00693	0.00549995	-0.0669126
chr1_199662641_199662667	chr1_199662647_199662662	CAGGATGAAGGCCTTC	4	16	859	plus	0.54637	0.571272	0.54637	chr1_199662647_199662662	chr1_199662647_199662662	3.47187	1.06126	0.441642	5.22009	0.0223274	NA	0.135166	-0.654581	0.206801	0.556809	0.3684	-0.0220665
chr1_199662641_199662667	chr1_199662647_199662665	CAGGATGAAGGCCTTCGGG	1	19	772	plus	0.495776	0.476893	0.495776	chr1_199662647_199662665	chr1_199662647_199662665	3.41015	0.911272	0.634937	1.84427	0.174451	NA	0.522929	-0.399009	0.0799823	1.09248	0.102057	-0.0615596
chr1_199662641_199662667	chr1_199662647_199662666	CAGGATGAAGGCCTTCGGGT	1	20	3018	plus	0.646933	0.614462	0.646933	chr1_199662647_199662666	chr1_199662647_199662666	13.2798	0.468965	0.51818	0.707654	0.400224	0.740103	0.995781	-0.0025108	0.0688733	0.918343	0.0727441	-0.050432
chr1_199662641_199662667	chr1_199662648_199662664	AGGATGAAGGCCTTCGG	1	17	638	plus	0.564693	0.551584	0.564693	chr1_199662648_199662664	chr1_199662648_199662664	2.83876	1.14097	0.470021	5.52063	0.0187935	NA	0.151265	-0.6842	0.177286	0.612436	0.115003	-0.0404558
chr1_199662641_199662667	chr1_199662648_199662665	AGGATGAAGGCCTTCGGG	1	18	3438	plus	0.68543	0.674581	0.68543	chr1_199662648_199662665	chr1_199662648_199662665	15.1296	0.995174	0.357413	7.62829	0.00574599	0.0932298	0.12941	-0.531926	0.0313453	0.750702	0.0128622	-0.0498378
chr1_199662641_199662667	chr1_199662648_199662666	AGGATGAAGGCCTTCGGGT	1	19	11561	plus	0.725518	0.717245	0.725518	chr1_199662648_199662666	chr1_199662648_199662666	50.8655	0.930986	0.353211	6.19004	0.0128471	0.141437	0.291389	-0.356119	0.0826786	0.588262	0.00136202	-0.0645581
chr1_199662641_199662667	chr1_199662649_199662664	GGATGAAGGCCTTCGG	1	16	640	plus	0.601346	0.584269	0.601346	chr1_199662649_199662664	chr1_199662649_199662664	2.79077	1.14704	0.463346	6.00099	0.0142978	NA	0.396679	-0.388079	0.101457	0.73842	0.0918792	-0.0431503
chr1_199662641_199662667	chr1_199662649_199662665	GGATGAAGGCCTTCGGG	1	17	2173	plus	0.708599	0.681512	0.708599	chr1_199662649_199662665	chr1_199662649_199662665	9.67756	0.927376	0.394895	5.30731	0.0212362	0.185123	0.117371	-0.623386	0.0730857	0.699064	0.0485693	-0.0440812
chr1_199662641_199662667	chr1_199662649_199662666	GGATGAAGGCCTTCGGGT	1	18	8970	plus	0.765244	0.728294	0.765244	chr1_199662649_199662666	chr1_199662649_199662666	39.1181	0.57411	0.369715	2.27342	0.131609	0.472415	0.208871	-0.458421	0.086401	0.612279	0.0135949	-0.0505681
chr1_199662641_199662667	chr1_199662650_199662665	GATGAAGGCCTTCGGG	1	16	1997	plus	0.662158	0.641379	0.662158	chr1_199662650_199662665	chr1_199662650_199662665	8.78636	1.23641	0.451238	7.36143	0.00666377	0.10072	0.0543666	-0.896827	0.0123587	1.15312	0.229864	-0.0313633
chr1_199662641_199662667	chr1_199662650_199662666	GATGAAGGCCTTCGGGT	1	17	4354	plus	0.723585	0.702869	0.723585	chr1_199662650_199662666	chr1_199662650_199662666	19.3616	0.865774	0.392714	4.56285	0.0326726	0.232205	0.0733534	-0.709804	0.0381002	0.821724	0.0104089	-0.0570464
chr1_199662641_199662667	chr1_199662651_199662665	ATGAAGGCCTTCGGG	2	15	693	plus	0.559404	0.551967	0.559404	chr1_199662651_199662665	chr1_199662651_199662665	3.17195	0.868685	0.40421	4.56824	0.03257	NA	0.306464	-0.411095	0.0450824	0.797595	0.286024	-0.0241308
chr1_199662641_199662667	chr1_199662652_199662666	TGAAGGCCTTCGGGT	3	15	1743	plus	0.607988	0.692271	0.607988	chr1_199662652_199662666	chr1_199662652_199662666	7.63843	0.437945	0.490731	0.76203	0.382694	0.730267	0.118348	-0.783311	0.00640405	1.37209	0.0944167	-0.0493132
chr1_202469292_202469385	chr1_202469294_202469310	TCCCTGGTGGTCTAGTG	41	17	8072	plus	0.636627	0.636627	0.636627	chr1_202469294_202469310	chr1_202469294_202469310	36.5142	0.10428	0.16373	0.440939	0.50667	0.799137	0.146352	-0.225176	0.170325	0.215524	0.538651	-0.00466826
chr1_202469292_202469385	chr1_202469294_202469311	TCCCTGGTGGTCTAGTGG	38	18	32352	plus	0.636627	0.636627	0.636627	chr1_202469294_202469311	chr1_202469294_202469311	148.985	-0.118316	0.151788	0.661609	0.415992	0.753865	0.621125	-0.0707597	0.058132	0.278397	0.486681	0.00499242
chr1_202469292_202469385	chr1_202469294_202469315	TCCCTGGTGGTCTAGTGGTTAG	21	22	16413	plus	0.170965	0.170965	0.165262	chr1_202469294_202469315	chr1_202469294_202469315	82.3404	-0.446222	0.107392	17.3754	3.06764e-05	0.004508	0.114762	0.159228	0.677926	0.0428435	0.248698	0.00561468
chr1_202469292_202469385	chr1_202469294_202469316	TCCCTGGTGGTCTAGTGGTTAGG	18	23	24924	plus	0.228956	0.228956	0.214017	chr1_202469294_202469316	chr1_202469294_202469316	125.368	-0.536764	0.119951	20.6386	5.54675e-06	0.00194705	0.15978	0.158713	0.678353	-0.0474977	0.684455	-0.00220122
chr1_202469292_202469385	chr1_202469294_202469317	TCCCTGGTGGTCTAGTGGTTAGGA	16	24	9706	plus	0.199291	0.199291	0.199291	chr1_202469294_202469317	chr1_202469294_202469317	47.204	-0.442399	0.137041	11.1164	0.000855689	0.0334343	0.358679	0.117958	0.871506	-0.0211822	0.631229	-0.00302331
chr1_202469292_202469385	chr1_202469294_202469318	TCCCTGGTGGTCTAGTGGTTAGGAT	14	25	82652	plus	0.535329	0.535329	0.515772	chr1_202469294_202469318	chr1_202469294_202469318	395.811	-0.291009	0.096334	9.29948	0.00229219	0.0578968	0.58193	0.0499572	0.968946	0.00358631	0.314762	0.00435938
chr1_202469292_202469385	chr1_202469294_202469319	TCCCTGGTGGTCTAGTGGTTAGGATT	13	26	410544	plus	0.546598	0.546598	0.546598	chr1_202469294_202469319	chr1_202469294_202469319	1905.94	-0.317742	0.155372	4.3652	0.0366801	0.249689	0.431285	0.11447	0.575893	0.0829988	0.197515	0.00926031
chr1_202469292_202469385	chr1_202469295_202469319	CCCTGGTGGTCTAGTGGTTAGGATT	15	25	8820	plus	0.511177	0.454323	0.480959	chr1_202469295_202469319	chr1_202469295_202469319	41.7346	-0.276018	0.148504	3.56555	0.0589901	0.315225	0.190147	0.182629	0.904697	0.0168989	0.354037	0.00616977
chr1_202469292_202469385	chr1_202469298_202469318	TGGTGGTCTAGTGGTTAGGAT	20	21	19692	plus	0.203834	0.203834	0.203834	chr1_202469298_202469318	chr1_202469298_202469318	97.1321	-0.315657	0.134171	5.54253	0.0185597	0.171968	0.137159	0.188588	0.000142255	-0.485284	0.242865	0.0068896
chr1_202469292_202469385	chr1_202469298_202469319	TGGTGGTCTAGTGGTTAGGATT	19	22	14677	plus	0.203834	0.203834	0.202824	chr1_202469298_202469319	chr1_202469298_202469319	73.1318	-0.017297	0.137516	0.0151142	0.902155	0.969362	0.0429943	0.264305	0.00626763	-0.3572	0.339221	0.00587901
chr1_204475618_204475755	chr1_204475655_204475669	GCCCGGATAGCTCAG	7	15	152271	plus	0.867556	0.867556	0.847991	chr1_204475655_204475669	chr1_204475655_204475669	728.095	-0.231394	0.264865	0.710328	0.399335	0.739644	0.541222	-0.16044	0.954108	0.0143967	0.450695	-0.0101323
chr1_204475618_204475755	chr1_204475655_204475670	GCCCGGATAGCTCAGT	7	16	576934	plus	0.754198	0.754198	0.754198	chr1_204475655_204475670	chr1_204475655_204475670	2665.36	0.224838	0.250832	0.729436	0.393066	0.735094	0.10354	-0.407873	0.352607	0.221599	0.0111339	-0.0307502
chr1_204475618_204475755	chr1_204475655_204475672	GCCCGGATAGCTCAGTCG	6	18	79342	plus	0.725736	0.725736	0.645772	chr1_204475655_204475672	chr1_204475655_204475672	374.166	0.508244	0.162753	9.03184	0.00265318	0.0629761	0.0145642	-0.38767	0.841805	0.030877	0.0523391	-0.0143289
chr1_204475618_204475755	chr1_204475655_204475673	GCCCGGATAGCTCAGTCGG	6	19	596462	plus	0.515596	0.515596	0.515596	chr1_204475655_204475673	chr1_204475655_204475673	2847.14	0.288729	0.129295	4.62029	0.0315959	0.2281	0.0091971	-0.327072	0.956372	-0.00671511	0.229747	-0.00723927
chr1_204475618_204475755	chr1_204475655_204475674	GCCCGGATAGCTCAGTCGGT	6	20	168864	plus	0.540725	0.540725	0.540725	chr1_204475655_204475674	chr1_204475655_204475674	827.412	0.309026	0.0994069	9.26467	0.00233616	0.0585752	0.359522	-0.0865976	0.131935	-0.142346	0.440117	-0.00348829
chr1_204475618_204475755	chr1_204475655_204475675	GCCCGGATAGCTCAGTCGGTA	6	21	212390	plus	0.602306	0.602306	0.532006	chr1_204475655_204475675	chr1_204475655_204475675	1047.6	0.232463	0.104482	4.78905	0.0286412	0.215646	0.69554	-0.0386614	0.194905	-0.128598	0.968533	-0.000189022
chr1_204475618_204475755	chr1_204475655_204475676	GCCCGGATAGCTCAGTCGGTAG	6	22	695601	plus	0.463056	0.463056	0.433899	chr1_204475655_204475676	chr1_204475655_204475676	3530.68	0.120663	0.114809	1.07742	0.299276	0.66221	0.157138	0.153279	0.662158	-0.0477678	0.49352	0.00361272
chr1_204475618_204475755	chr1_204475655_204475677	GCCCGGATAGCTCAGTCGGTAGA	6	23	146506	plus	0.374444	0.374444	0.357495	chr1_204475655_204475677	chr1_204475655_204475677	718.481	-0.0329479	0.0922697	0.121957	0.726922	0.905725	0.745425	-0.0282869	0.301393	-0.0903701	0.65263	-0.00188426
chr1_204475618_204475755	chr1_204475655_204475678	GCCCGGATAGCTCAGTCGGTAGAG	6	24	213042	plus	0.769473	0.769473	0.666875	chr1_204475655_204475678	chr1_204475655_204475678	1028.19	0.197799	0.122636	2.42512	0.119404	0.447681	0.687871	0.0464021	0.0682752	-0.211375	0.713395	-0.00204724
chr1_204475618_204475755	chr1_204475655_204475679	GCCCGGATAGCTCAGTCGGTAGAGC	6	25	419860	plus	0.777409	0.716423	0.755935	chr1_204475655_204475679	chr1_204475655_204475679	1991.39	0.387618	0.190392	3.55258	0.0594528	0.315847	0.751907	-0.0573485	0.0684081	-0.33004	0.390029	-0.00740612
chr1_204475618_204475755	chr1_204475655_204475680	GCCCGGATAGCTCAGTCGGTAGAGCA	6	26	142239	plus	0.856114	0.79365	0.822138	chr1_204475655_204475680	chr1_204475655_204475680	669.252	0.503661	0.209207	5.24239	0.022043	0.188724	0.75689	-0.0612133	0.0272687	-0.439947	0.109577	-0.0143163
chr1_204475618_204475755	chr1_204475655_204475681	GCCCGGATAGCTCAGTCGGTAGAGCAT	6	27	273729	plus	0.913225	0.700966	0.761342	chr1_204475655_204475681	chr1_204475655_204475681	1289.29	0.615021	0.241166	6.12882	0.0132996	0.144129	0.777039	0.0645742	0.0387885	-0.474502	0.126692	-0.0155253
chr1_204475618_204475755	chr1_204475655_204475682	GCCCGGATAGCTCAGTCGGTAGAGCATC	6	28	55594	plus	0.870915	0.723709	0.856603	chr1_204475655_204475682	chr1_204475655_204475682	259.34	0.274865	0.272039	0.996489	0.318161	0.680758	0.351347	0.239576	0.31639	-0.261491	0.500892	-0.00784508
chr1_204475618_204475755	chr1_204475655_204475684	GCCCGGATAGCTCAGTCGGTAGAGCATCAG	6	30	48217	plus	0.88824	0.88824	0.878334	chr1_204475655_204475684	chr1_204475655_204475684	225.855	-0.043586	0.190631	0.0486574	0.825416	0.944735	0.0051028	0.496137	0.0119309	-0.462198	0.463179	0.00631981
chr1_204475618_204475755	chr1_204475655_204475685	GCCCGGATAGCTCAGTCGGTAGAGCATCAGA	6	31	280635	plus	0.88824	0.88824	0.88824	chr1_204475655_204475685	chr1_204475655_204475685	1327.02	0.133468	0.168572	0.607769	0.435629	0.765492	0.0313873	0.339814	0.42525	-0.12833	0.460641	0.00557778
chr1_204475618_204475755	chr1_204475657_204475681	CCGGATAGCTCAGTCGGTAGAGCAT	6	25	53328	plus	NA	0.17343	Inf	chr1_204475657_204475681	chr1_204475657_204475681	258.828	0.0432568	0.113647	0.142103	0.706199	0.899799	0.0142073	0.261802	0.218203	-0.132815	0.0521889	0.0102028
chr1_204476138_204476247	chr1_204476200_204476230	TCTGATGCTCTACCGACTGAGCTATCCGGGC	6	31	280635	minus	0.88824	0.88824	0.88824	chr1_204476200_204476230	chr1_204476200_204476230	1327.02	0.133468	0.168572	0.607769	0.435629	0.765492	0.0313873	0.339814	0.42525	-0.12833	0.460641	0.00557778
chr1_204476138_204476247	chr1_204476201_204476230	CTGATGCTCTACCGACTGAGCTATCCGGGC	6	30	48217	minus	0.878334	0.878334	0.878334	chr1_204476201_204476230	chr1_204476201_204476230	225.855	-0.043586	0.190631	0.0486574	0.825416	0.944735	0.0051028	0.496137	0.0119309	-0.462198	0.463179	0.00631981
chr1_204476138_204476247	chr1_204476203_204476230	GATGCTCTACCGACTGAGCTATCCGGGC	6	28	55594	minus	0.856603	0.733451	0.856603	chr1_204476203_204476230	chr1_204476203_204476230	259.34	0.274865	0.272039	0.996489	0.318161	0.680758	0.351347	0.239576	0.31639	-0.261491	0.500892	-0.00784508
chr1_204476138_204476247	chr1_204476204_204476228	ATGCTCTACCGACTGAGCTATCCGG	6	25	53328	minus	NA	0.151682	Inf	chr1_204476204_204476228	chr1_204476204_204476228	258.828	0.0432568	0.113647	0.142103	0.706199	0.899799	0.0142073	0.261802	0.218203	-0.132815	0.0521889	0.0102028
chr1_204476138_204476247	chr1_204476204_204476230	ATGCTCTACCGACTGAGCTATCCGGGC	6	27	273729	minus	0.761342	0.685664	0.761342	chr1_204476204_204476230	chr1_204476204_204476230	1289.29	0.615021	0.241166	6.12882	0.0132996	0.144129	0.777039	0.0645742	0.0387885	-0.474502	0.126692	-0.0155253
chr1_204476138_204476247	chr1_204476205_204476230	TGCTCTACCGACTGAGCTATCCGGGC	6	26	142239	minus	0.822138	0.773987	0.822138	chr1_204476205_204476230	chr1_204476205_204476230	669.252	0.503661	0.209207	5.24239	0.022043	0.188724	0.75689	-0.0612133	0.0272687	-0.439947	0.109577	-0.0143163
chr1_204476138_204476247	chr1_204476206_204476230	GCTCTACCGACTGAGCTATCCGGGC	6	25	419860	minus	0.755935	0.755935	0.755935	chr1_204476206_204476230	chr1_204476206_204476230	1991.39	0.387618	0.190392	3.55258	0.0594528	0.315847	0.751907	-0.0573485	0.0684081	-0.33004	0.390029	-0.00740612
chr1_204476138_204476247	chr1_204476207_204476230	CTCTACCGACTGAGCTATCCGGGC	6	24	213042	minus	0.666875	0.666875	0.666875	chr1_204476207_204476230	chr1_204476207_204476230	1028.19	0.197799	0.122636	2.42512	0.119404	0.447681	0.687871	0.0464021	0.0682752	-0.211375	0.713395	-0.00204724
chr1_204476138_204476247	chr1_204476208_204476230	TCTACCGACTGAGCTATCCGGGC	6	23	146506	minus	0.357495	0.357495	0.357495	chr1_204476208_204476230	chr1_204476208_204476230	718.481	-0.0329479	0.0922697	0.121957	0.726922	0.905725	0.745425	-0.0282869	0.301393	-0.0903701	0.65263	-0.00188426
chr1_204476138_204476247	chr1_204476209_204476230	CTACCGACTGAGCTATCCGGGC	6	22	695601	minus	0.433899	0.433899	0.433899	chr1_204476209_204476230	chr1_204476209_204476230	3530.68	0.120663	0.114809	1.07742	0.299276	0.66221	0.157138	0.153279	0.662158	-0.0477678	0.49352	0.00361272
chr1_204476138_204476247	chr1_204476210_204476230	TACCGACTGAGCTATCCGGGC	6	21	212390	minus	0.532006	0.532006	0.532006	chr1_204476210_204476230	chr1_204476210_204476230	1047.6	0.232463	0.104482	4.78905	0.0286412	0.215646	0.69554	-0.0386614	0.194905	-0.128598	0.968533	-0.000189022
chr1_204476138_204476247	chr1_204476211_204476230	ACCGACTGAGCTATCCGGGC	6	20	168864	minus	0.606869	0.606869	0.540725	chr1_204476211_204476230	chr1_204476211_204476230	827.412	0.309026	0.0994069	9.26467	0.00233616	0.0585752	0.359522	-0.0865976	0.131935	-0.142346	0.440117	-0.00348829
chr1_204476138_204476247	chr1_204476212_204476230	CCGACTGAGCTATCCGGGC	6	19	596462	minus	0.609593	0.609593	0.515596	chr1_204476212_204476230	chr1_204476212_204476230	2847.14	0.288729	0.129295	4.62029	0.0315959	0.2281	0.0091971	-0.327072	0.956372	-0.00671511	0.229747	-0.00723927
chr1_204476138_204476247	chr1_204476213_204476230	CGACTGAGCTATCCGGGC	6	18	79342	minus	0.645772	0.645772	0.645772	chr1_204476213_204476230	chr1_204476213_204476230	374.166	0.508244	0.162753	9.03184	0.00265318	0.0629761	0.0145642	-0.38767	0.841805	0.030877	0.0523391	-0.0143289
chr1_204476138_204476247	chr1_204476215_204476230	ACTGAGCTATCCGGGC	7	16	576934	minus	0.867556	0.867556	0.754198	chr1_204476215_204476230	chr1_204476215_204476230	2665.36	0.224838	0.250832	0.729436	0.393066	0.735094	0.10354	-0.407873	0.352607	0.221599	0.0111339	-0.0307502
chr1_204476138_204476247	chr1_204476216_204476230	CTGAGCTATCCGGGC	7	15	152271	minus	0.867556	0.867556	0.847991	chr1_204476216_204476230	chr1_204476216_204476230	728.095	-0.231394	0.264865	0.710328	0.399335	0.739644	0.541222	-0.16044	0.954108	0.0143967	0.450695	-0.0101323
chr1_204531535_204531619	chr1_204531539_204531553	AAAGCCTACAGCACC	47	15	23614	minus	1	1	0.729239	chr1_204531539_204531553	chr1_204531539_204531553	104.394	0.287609	0.19597	2.24667	0.133902	0.473021	0.365288	-0.170692	0.27185	-0.208375	0.679408	-0.00374941
chr1_204531535_204531619	chr1_204531560_204531582	TCCCAGGCGGTCTCCCATCCAAG	19	23	4909	minus	1	1	1	chr1_204531560_204531582	chr1_204531560_204531582	23.6197	-1.30625	0.279207	18.5474	1.65729e-05	0.0033782	0.548827	-0.178482	0.00022086	-1.11912	5.9625e-08	0.0654182
chr1_204531535_204531619	chr1_204531565_204531584	GGCGGTCTCCCATCCAAGTA	21	20	5207	minus	1	1	1	chr1_204531565_204531584	chr1_204531565_204531584	26.6058	0.0812304	0.163517	0.236586	0.626683	0.857135	0.0489658	0.307704	0.144351	-0.226837	0.507676	0.00488057
chr1_204531535_204531619	chr1_204531574_204531598	CCATCCAAGTACTAACCAGGCCCGA	59	25	9169	minus	0.300661	0.300661	0.300661	chr1_204531574_204531598	chr1_204531574_204531598	46.26	0.292214	0.16611	2.94797	0.0859858	0.377106	0.0850536	0.2746	0.496021	-0.109696	0.370651	0.00641596
chr1_204531535_204531619	chr1_204531574_204531599	CCATCCAAGTACTAACCAGGCCCGAC	59	26	5706	minus	0.300661	0.300661	0.300661	chr1_204531574_204531599	chr1_204531574_204531599	27.1566	0.386754	0.138151	7.73337	0.00542094	0.0916489	0.0420366	0.266837	0.316067	-0.132805	0.766047	0.00183517
chr1_204531535_204531619	chr1_204531577_204531597	TCCAAGTACTAACCAGGCCCG	65	21	5450	minus	0.156509	0.156509	0.156509	chr1_204531577_204531597	chr1_204531577_204531597	26.6204	0.197862	0.14286	1.87753	0.170615	0.520496	0.169434	0.189228	0.0186163	-0.324809	0.171513	-0.00907036
chr1_204531535_204531619	chr1_204531577_204531598	TCCAAGTACTAACCAGGCCCGA	64	22	10278	minus	0.156509	0.156509	0.156509	chr1_204531577_204531598	chr1_204531577_204531598	52.5438	0.358846	0.147826	5.648	0.0174753	0.166435	0.635854	0.0664584	0.471311	-0.101247	0.352092	0.0061379
chr1_204531535_204531619	chr1_204531581_204531599	AGTACTAACCAGGCCCGAC	73	19	5643	minus	0.373529	0.373529	0.373529	chr1_204531581_204531599	chr1_204531581_204531599	28.8715	0.453326	0.210488	4.65843	0.0309015	0.225532	0.0357987	0.413599	0.89597	-0.0263527	0.266162	-0.0106108
chr1_204531535_204531619	chr1_204531582_204531599	GTACTAACCAGGCCCGAC	73	18	6758	minus	0.373529	0.373529	0.373529	chr1_204531582_204531599	chr1_204531582_204531599	35.486	0.218985	0.225028	0.941461	0.331902	0.691698	0.0896526	0.361979	0.481638	0.155239	0.344066	-0.00973394
chr1_204531535_204531619	chr1_204531587_204531607	AACCAGGCCCGACCCTGCTTA	66	21	15524	minus	1	1	1	chr1_204531587_204531607	chr1_204531587_204531607	81.2497	0.0347612	0.181136	0.0350544	0.851482	0.954535	0.292501	0.181621	0.000383356	-0.610328	0.7494	-0.0027699
chr1_204640853_204640906	chr1_204640859_204640884	CCTCCCACTGCTAAATTTGACTGGCT	2	26	6650	plus	0.528771	4.40924e-06	0.528771	chr1_204640859_204640884	chr1_204640859_204640884	32.9766	0.0837755	0.15107	0.307693	0.579099	0.840461	0.0175529	-0.343958	0.896922	0.0188618	0.0430433	-0.0139318
chr1_204640853_204640906	chr1_204640859_204640885	CCTCCCACTGCTAAATTTGACTGGCTA	1	27	4865	plus	0.528771	0.0240818	0.528771	chr1_204640859_204640885	chr1_204640859_204640885	23.5232	0.0223488	0.176771	0.016163	0.898835	0.969362	0.00928164	-0.445084	0.7556	0.0534674	0.0396992	-0.0162785
chr1_204640853_204640906	chr1_204640861_204640884	TCCCACTGCTAAATTTGACTGGCT	6	24	13511	plus	0.415083	0.376686	0.415083	chr1_204640861_204640884	chr1_204640861_204640884	70.1701	-0.174366	0.146584	1.40523	0.23585	0.605137	0.139607	0.207443	0.880187	0.0214173	0.619688	-0.00336443
chr1_204640853_204640906	chr1_204640862_204640881	CCCACTGCTAAATTTGACTG	29	20	5909	plus	0.0976001	0.0976001	0.0976001	chr1_204640862_204640881	chr1_204640862_204640881	30.5699	0.2239	0.225257	0.917326	0.338178	0.697264	0.0580476	0.403064	0.475246	0.154695	0.200954	-0.0135054
chr1_204640853_204640906	chr1_204640862_204640882	CCCACTGCTAAATTTGACTGG	27	21	26284	plus	0.46039	0.46039	0.444268	chr1_204640862_204640882	chr1_204640862_204640882	142.945	0.096508	0.181987	0.269096	0.603939	0.852802	0.0357754	0.367247	0.934121	-0.0144868	0.916431	0.000848972
chr1_204640853_204640906	chr1_204640862_204640883	CCCACTGCTAAATTTGACTGGC	25	22	77149	plus	0.654786	0.654786	0.147586	chr1_204640862_204640883	chr1_204640862_204640883	420.316	0.307178	0.171695	2.96555	0.0850553	0.375494	0.123476	0.253543	0.376534	-0.145229	0.548435	-0.00464451
chr1_204640853_204640906	chr1_204640862_204640884	CCCACTGCTAAATTTGACTGGCT	23	23	247829	plus	0.556928	0.556928	0.315998	chr1_204640862_204640884	chr1_204640862_204640884	1342.99	0.121033	0.136067	0.755873	0.384623	0.730267	0.000941619	0.428351	0.128859	-0.196919	0.627352	-0.00299282
chr1_204640853_204640906	chr1_204640862_204640885	CCCACTGCTAAATTTGACTGGCTA	2	24	7405	plus	0.0178725	0.0178725	0.0178725	chr1_204640862_204640885	chr1_204640862_204640885	37.6566	-0.0499797	0.14981	0.108104	0.742314	0.913055	0.426728	0.111928	0.758496	0.044142	0.864432	-0.00117002
chr1_204640853_204640906	chr1_204640863_204640883	CCACTGCTAAATTTGACTGGC	28	21	6880	plus	0.47056	0.447743	0.453146	chr1_204640863_204640883	chr1_204640863_204640883	36.7666	0.128577	0.202112	0.36379	0.546409	0.82344	0.0397701	0.400597	0.426644	-0.152471	0.448959	-0.0067866
chr1_204640853_204640906	chr1_204640863_204640884	CCACTGCTAAATTTGACTGGCT	26	22	24132	plus	0.551863	0.522147	0.274199	chr1_204640863_204640884	chr1_204640863_204640884	128.961	-0.00454582	0.144066	0.000935703	0.975597	0.991324	0.00368079	0.397492	0.672842	-0.0579345	0.586852	0.00353347
chr1_204640853_204640906	chr1_204640863_204640885	CCACTGCTAAATTTGACTGGCTA	2	23	5821	plus	0.0327907	0.0341117	0.0327907	chr1_204640863_204640885	chr1_204640863_204640885	29.4919	-0.0941957	0.192333	0.220256	0.638845	0.86227	0.604317	-0.0947868	0.846547	0.0355042	0.850335	0.00170768
chr1_204640853_204640906	chr1_204640866_204640884	CTGCTAAATTTGACTGGCT	39	19	9182	plus	0.0238473	0.0238473	0.0238473	chr1_204640866_204640884	chr1_204640866_204640884	46.955	0.116617	0.140112	0.655068	0.418307	0.753865	0.120037	0.211534	0.431477	-0.106915	0.284159	-0.00691322
chr1_204640853_204640906	chr1_204640866_204640885	CTGCTAAATTTGACTGGCTA	6	20	4843	plus	0.0238473	0.0238473	0.0238473	chr1_204640866_204640885	chr1_204640866_204640885	24.1763	-0.0623765	0.186424	0.109552	0.740655	0.912816	0.601924	-0.0916779	0.718275	-0.0638207	0.806346	0.00205704
chr1_207975206_207975301	chr1_207975210_207975231	TAACCGATTTCAAATGGTGCTA	1	22	611242	minus	0.338738	0.338738	0.338738	hsa-mir-29c	chr1_207975210_207975231	3155.4	-0.343455	0.0944628	13.339	0.000259948	0.0166489	0.00093791	0.293951	0.348732	-0.084082	0.0140545	0.0106207
chr1_207975206_207975301	chr1_207975211_207975231	AACCGATTTCAAATGGTGCTA	1	21	563388	minus	0.560609	0.560609	0.560609	hsa-mir-29c	chr1_207975211_207975231	2937.74	-0.229982	0.11742	3.75432	0.0526713	0.297695	0.00168267	0.351178	0.386087	-0.0966768	0.218401	0.00648416
chr1_207975206_207975301	chr1_207975212_207975231	ACCGATTTCAAATGGTGCTA	1	20	664694	minus	0.651665	0.651665	0.651665	hsa-mir-29c	chr1_207975212_207975231	3498.32	0.0213851	0.152961	0.0188603	0.890768	0.967116	0.0362409	0.305798	0.608671	-0.0746853	0.449074	0.00526948
chr1_207975206_207975301	chr1_207975213_207975231	CCGATTTCAAATGGTGCTA	1	19	117601	minus	0.566197	0.566197	0.566197	hsa-mir-29c	chr1_207975213_207975231	600.22	-0.058972	0.132621	0.194906	0.658865	0.872919	0.55752	0.0752026	0.501268	-0.0851167	0.51286	0.00391512
chr1_207975792_207975826	chr1_207975795_207975817	AACACTGATTTCAAATGGTGCTA	2	23	209267	minus	0.11891	0.11891	0.11891	hsa-mir-29b-2	chr1_207975795_207975817	1027.86	0.0792717	0.149343	0.280327	0.596487	0.848796	0.025158	0.316707	0.770247	-0.0419738	0.54424	-0.00426673
chr1_207975792_207975826	chr1_207975796_207975817	ACACTGATTTCAAATGGTGCTA	2	22	179738	minus	0.344556	0.344556	0.344556	hsa-mir-29b-2	chr1_207975796_207975817	934.443	-0.231514	0.122055	3.56639	0.0589605	0.315225	0.000305438	0.415962	0.882834	-0.0170792	0.288676	0.00575616
chr1_207975792_207975826	chr1_207975796_207975818	ACACTGATTTCAAATGGTGCTAG	2	23	19291	minus	0.111533	0.111533	0.111533	hsa-mir-29b-2	chr1_207975796_207975818	99.5481	-0.378028	0.119975	10.001	0.00156453	0.045913	0.00293766	0.337226	0.863797	-0.0196929	0.123464	0.00851581
chr1_207975792_207975826	chr1_207975797_207975817	CACTGATTTCAAATGGTGCTA	2	21	383237	minus	0.498728	0.498728	0.498728	hsa-mir-29b-2	chr1_207975797_207975817	2046.67	0.00404509	0.147197	0.000725499	0.978511	0.992908	0.00111652	0.460801	0.998385	-0.000283004	0.0789449	0.011195
chr1_207975792_207975826	chr1_207975797_207975818	CACTGATTTCAAATGGTGCTAG	2	22	70175	minus	0.529068	0.529068	0.529068	hsa-mir-29b-2	chr1_207975797_207975818	385.892	-0.0698431	0.152142	0.204091	0.651439	0.870939	0.000100135	0.565102	0.992047	0.00145677	0.0130453	0.0168069
chr1_207975792_207975826	chr1_207975798_207975817	ACTGATTTCAAATGGTGCTA	2	20	77182	minus	0.702876	0.702876	0.702876	hsa-mir-29b-2	chr1_207975798_207975817	394.965	-0.150308	0.127183	1.3914	0.238168	0.607287	0.00371437	0.353764	0.856825	-0.0218324	0.308101	0.00563764
chr1_209605509_209605538	chr1_209605511_209605528	TCCTTCATTCCACCGGAG	1	18	816	plus	0.18895	0.18895	0.18895	hsa-mir-205	chr1_209605511_209605528	3.5295	0.94811	0.322876	8.90953	0.00283686	NA	0.0446088	-0.620746	0.262867	-0.344953	0.158183	-0.0203313
chr1_209605509_209605538	chr1_209605511_209605529	TCCTTCATTCCACCGGAGT	1	19	10507	plus	0.266428	0.266428	0.266428	hsa-mir-205	chr1_209605511_209605529	47.8737	0.0351337	0.197568	0.0306226	0.861085	0.957942	0.375038	-0.165614	0.566396	-0.107418	0.293127	-0.00942638
chr1_209605509_209605538	chr1_209605511_209605530	TCCTTCATTCCACCGGAGTC	1	20	2322	plus	0.197787	0.197787	0.197787	hsa-mir-205	chr1_209605511_209605530	10.9275	-0.255636	0.25719	0.928396	0.33528	0.695057	0.74519	-0.0787027	0.0499511	-0.476819	0.557283	-0.0065738
chr1_209605509_209605538	chr1_209605511_209605531	TCCTTCATTCCACCGGAGTCT	1	21	10336	plus	0.292219	0.292219	0.292219	hsa-mir-205	chr1_209605511_209605531	50.2609	-0.351457	0.188071	3.20648	0.0733473	0.352671	0.252104	0.205096	6.10413e-05	-0.707613	0.023459	-0.0186923
chr1_209605509_209605538	chr1_209605511_209605532	TCCTTCATTCCACCGGAGTCTG	1	22	11180	plus	0.274736	0.274736	0.274736	hsa-mir-205	chr1_209605511_209605532	55.8219	-0.0556296	0.193882	0.0784409	0.779421	0.926913	0.754457	0.0572031	0.00299186	-0.542537	1.67962e-05	-0.0368908
chr1_209605509_209605538	chr1_209605511_209605533	TCCTTCATTCCACCGGAGTCTGT	1	23	4001	plus	0.18554	0.18554	0.18554	hsa-mir-205	chr1_209605511_209605533	19.2709	-0.294535	0.290971	0.956746	0.328008	0.689898	0.0803	0.486016	1.76152e-05	-1.16485	0.0555722	-0.024869
chr1_220291545_220291571	chr1_220291548_220291569	TCCACATGGAGTTGCTGTTACA	2	22	212920	minus	0.399536	0.399536	0.399536	hsa-mir-194-1	chr1_220291548_220291569	1122.41	-0.275296	0.152944	3.15237	0.0758166	0.358295	0.000121732	0.571096	0.000157025	-0.547436	0.260917	-0.00756716
chr1_220291545_220291571	chr1_220291549_220291568	CCACATGGAGTTGCTGTTAC	2	20	16436	minus	0.712858	0.712858	0.712858	hsa-mir-194-1	chr1_220291549_220291568	83.4787	-0.123315	0.159382	0.588461	0.443015	0.768338	0.119587	0.238244	0.161848	-0.211855	0.528886	-0.00458843
chr1_220291545_220291571	chr1_220291549_220291569	CCACATGGAGTTGCTGTTACA	2	21	1261648	minus	0.425339	0.425339	0.425339	hsa-mir-194-1	chr1_220291549_220291569	6535.65	-0.105985	0.145321	0.526487	0.468087	0.780859	0.0467517	0.278029	0.10238	-0.225345	0.264902	-0.00734082
chr1_220373886_220373953	chr1_220373890_220373913	TTGTAGGCTGGGGATAAATGAATA	1	24	12787	minus	0.413337	0.413337	0.413337	hsa-mir-664;ACA36B	chr1_220373890_220373913	66.6343	-0.380513	0.162243	5.45342	0.01953	0.177475	0.780951	-0.042783	0.504466	0.104065	0.775335	-0.0021118
chr1_220373886_220373953	chr1_220373891_220373913	TGTAGGCTGGGGATAAATGAATA	1	23	38027	minus	0.389247	0.389247	0.389247	hsa-mir-664;ACA36B	chr1_220373891_220373913	201.59	-0.247769	0.139458	3.08201	0.0791627	0.366256	0.0836329	0.22872	0.759	-0.0408916	0.426	-0.00497834
chr1_220373886_220373953	chr1_220373892_220373913	GTAGGCTGGGGATAAATGAATA	1	22	4805	minus	0.252343	0.252343	0.252343	hsa-mir-664;ACA36B	chr1_220373892_220373913	24.996	-0.411521	0.166375	5.80314	0.0159976	0.16018	0.345956	0.148955	0.68674	0.0639455	0.794411	0.00192008
chr1_220373886_220373953	chr1_220373929_220373949	TCCAATCATTTTCCCTAGCCA	1	21	18165	minus	0.358174	0.319333	0.358174	hsa-mir-664;ACA36B	chr1_220373929_220373949	91.6003	-0.320124	0.10447	9.59194	0.00195433	0.0533002	0.104153	0.160128	0.051484	-0.194763	0.0261336	0.0106941
chr1_220373886_220373953	chr1_220373929_220373950	TCCAATCATTTTCCCTAGCCAG	1	22	48294	minus	0.379279	0.379279	0.379279	hsa-mir-664;ACA36B	chr1_220373929_220373950	246.634	-0.254396	0.106197	5.83013	0.0157539	0.157914	0.100657	0.16446	0.264341	-0.113443	0.0264011	0.0106064
chr1_220373886_220373953	chr1_220373929_220373951	TCCAATCATTTTCCCTAGCCAGT	1	23	14489	minus	0.16849	0.159374	0.16849	hsa-mir-664;ACA36B	chr1_220373929_220373951	73.7546	-0.23037	0.102373	5.18141	0.0228298	0.193974	0.00820094	0.25804	0.0869011	-0.167946	0.233429	0.00540696
chr1_220373886_220373953	chr1_220373930_220373950	CCAATCATTTTCCCTAGCCAG	1	21	13236	minus	0.293488	0.293488	0.293488	hsa-mir-664;ACA36B	chr1_220373930_220373950	67.2152	-0.130532	0.0979456	1.73312	0.188013	0.544912	0.0276238	0.204339	0.967541	0.00382675	0.275474	0.00479354
chr1_220373886_220373953	chr1_220373930_220373951	CCAATCATTTTCCCTAGCCAGT	1	22	120090	minus	0.309178	0.317951	0.309178	hsa-mir-664;ACA36B	chr1_220373930_220373951	618.264	-0.22315	0.0791472	7.99377	0.00469385	0.0855695	0.0450789	0.150089	0.411999	-0.0619717	0.00737471	0.00941486
chr1_220373886_220373953	chr1_220373931_220373951	CAATCATTTTCCCTAGCCAGT	1	21	9260	minus	0.121848	0.121848	0.121848	hsa-mir-664;ACA36B	chr1_220373931_220373951	46.7782	-0.21929	0.0904915	5.93257	0.0148635	0.153311	0.747277	-0.0274527	0.333978	-0.0831971	0.190838	0.00535051
chr1_224052291_224052451	chr1_224052392_224052409	CACATAGGAATCCTTCTG	4	18	91283	minus	0.88716	0.754457	0.791305	chr1_224052392_224052409	chr1_224052392_224052409	413.44	-0.0144584	0.20146	0.00510575	0.943036	0.980113	0.0035941	-0.571359	0.0343246	0.416148	0.342427	-0.00903062
chr1_224052291_224052451	chr1_224052392_224052410	CACATAGGAATCCTTCTGA	3	19	277575	minus	0.922595	0.907712	0.922595	chr1_224052392_224052410	chr1_224052392_224052410	1281.47	0.104378	0.177599	0.341841	0.558768	0.828418	0.00732436	-0.460207	0.0567844	0.326697	0.399041	-0.00687321
chr1_224052291_224052451	chr1_224052392_224052411	CACATAGGAATCCTTCTGAC	3	20	530390	minus	0.93651	0.886881	0.93651	chr1_224052392_224052411	chr1_224052392_224052411	2495.02	0.158638	0.174172	0.820781	0.364952	0.718503	0.0226566	-0.382096	0.122348	0.25809	0.738387	-0.00264285
chr1_224052291_224052451	chr1_224052392_224052412	CACATAGGAATCCTTCTGACC	3	21	133618	minus	0.948431	0.917192	0.948431	chr1_224052392_224052412	chr1_224052392_224052412	627.469	0.0347777	0.170327	0.0415129	0.838551	0.949651	0.01935	-0.382446	0.198569	0.210491	0.628581	0.00380173
chr1_224052291_224052451	chr1_224052392_224052413	CACATAGGAATCCTTCTGACCC	3	22	23266	minus	0.842056	0.8073	0.842056	chr1_224052392_224052413	chr1_224052392_224052413	109.678	0.115149	0.154725	0.548971	0.458738	0.775267	0.0586545	-0.279071	0.520174	0.0948823	0.690628	-0.00279228
chr1_224052291_224052451	chr1_224052392_224052414	CACATAGGAATCCTTCTGACCCA	3	23	29445	minus	0.790876	0.816995	0.790876	chr1_224052392_224052414	chr1_224052392_224052414	136.832	0.243952	0.160611	2.31345	0.128259	0.464117	0.00392174	-0.443771	0.253357	0.175503	0.999407	-5.13319e-06
chr1_224052291_224052451	chr1_224052392_224052415	CACATAGGAATCCTTCTGACCCAT	3	24	18915	minus	0.810559	0.793733	0.810559	chr1_224052392_224052415	chr1_224052392_224052415	86.5348	0.260393	0.166198	2.43537	0.118626	0.446119	0.1586	-0.224997	0.541039	0.0975601	0.988889	0.000102305
chr1_224052291_224052451	chr1_224052392_224052416	CACATAGGAATCCTTCTGACCCATG	3	25	52616	minus	0.909708	0.895876	0.909708	chr1_224052392_224052416	chr1_224052392_224052416	240.488	0.211333	0.171876	1.5004	0.220609	0.585782	0.0384556	-0.339475	0.571698	0.0933686	0.990568	9.09875e-05
chr1_224052291_224052451	chr1_224052392_224052417	CACATAGGAATCCTTCTGACCCATGC	3	26	171621	minus	0.919698	0.88521	0.919698	chr1_224052392_224052417	chr1_224052392_224052417	782.093	0.374022	0.185053	4.03092	0.0446737	0.272697	0.0241322	-0.399323	0.739596	0.0588362	0.780008	0.00225687
chr1_224444739_224444777	chr1_224444751_224444772	TTGCCCTCTCAACCCAGCTTTT	2	22	14356	minus	0.165122	0.165122	0.165122	hsa-mir-320b-2	chr1_224444751_224444772	72.7035	-0.111589	0.109116	1.04872	0.305803	0.669283	0.188465	0.136251	0.0237993	-0.235396	0.20678	0.00617112
chr1_224444739_224444777	chr1_224444752_224444772	TGCCCTCTCAACCCAGCTTTT	2	21	73230	minus	0.21631	0.21631	0.21631	hsa-mir-320b-2	chr1_224444752_224444772	389.714	-0.0373766	0.149028	0.0610273	0.80488	0.936455	0.155181	0.203096	0.588734	-0.0774317	0.0797908	0.0115329
chr1_224444739_224444777	chr1_224444753_224444771	GCCCTCTCAACCCAGCTTT	3	19	27406	minus	0.564044	0.552944	0.544559	hsa-mir-320b-2	chr1_224444753_224444771	132.309	0.188626	0.120994	2.36997	0.123689	0.454548	0.155753	-0.165342	0.057838	-0.217099	0.166268	-0.00770785
chr1_224444739_224444777	chr1_224444753_224444772	GCCCTCTCAACCCAGCTTTT	3	20	476166	minus	0.429017	0.429017	0.379261	hsa-mir-320b-2	chr1_224444753_224444772	2351.78	0.156587	0.101024	2.36213	0.124312	0.456286	0.432597	-0.075942	0.000265138	-0.347958	0.620622	-0.00228123
chr1_224444739_224444777	chr1_224444753_224444773	GCCCTCTCAACCCAGCTTTTC	3	21	13076	minus	0.202731	0.198169	0.202731	hsa-mir-320b-2	chr1_224444753_224444773	64.9243	-0.120633	0.103998	1.34021	0.246997	0.61475	0.409651	0.0823129	0.00581949	-0.272156	0.428332	0.00367175
chr1_224444739_224444777	chr1_224444754_224444772	CCCTCTCAACCCAGCTTTT	5	19	172671	minus	0.554872	0.554872	0.500588	hsa-mir-320b-2	chr1_224444754_224444772	839.907	0.256123	0.126672	3.91314	0.04791	0.282024	0.429451	-0.097938	0.201439	-0.15276	0.0127445	-0.0146047
chr1_224444739_224444777	chr1_224444755_224444772	CCTCTCAACCCAGCTTTT	8	18	89410	minus	0.727826	0.727826	0.432416	hsa-mir-320b-2	chr1_224444755_224444772	421.917	0.252455	0.158842	2.33262	0.126688	0.461104	0.435699	-0.123446	0.315258	0.151939	0.123442	-0.0114974
chr1_228745976_228746149	chr1_228746013_228746030	AAAGCCTACAGCACCCGG	25	18	252593	minus	0.829446	0.48389	0.756879	chr1_228746013_228746030	chr1_228746013_228746030	1159.35	0.186466	0.12865	2.05956	0.151254	0.494665	0.00733315	-0.332384	0.300055	-0.126714	0.0454596	-0.011658
chr1_228745976_228746149	chr1_228746013_228746031	AAAGCCTACAGCACCCGGT	24	19	470606	minus	0.754514	0.6135	0.753218	chr1_228746013_228746031	chr1_228746013_228746031	2210.25	0.257731	0.100976	6.27678	0.012233	0.137694	0.0432449	-0.195738	0.0543092	-0.184257	0.0544346	-0.00879444
chr1_228745976_228746149	chr1_228746013_228746032	AAAGCCTACAGCACCCGGTA	24	20	589955	minus	0.655495	0.564701	0.655294	chr1_228746013_228746032	chr1_228746013_228746032	2868.77	0.125149	0.0831711	2.18145	0.139683	0.482132	0.412753	-0.0647471	0.00415777	-0.226069	0.495555	-0.00257541
chr1_228745976_228746149	chr1_228746013_228746033	AAAGCCTACAGCACCCGGTAT	24	21	396600	minus	0.648795	0.606887	0.643892	chr1_228746013_228746033	chr1_228746013_228746033	1916.84	0.158469	0.0966912	2.54971	0.110315	0.429152	0.455043	-0.0686128	0.00295949	-0.272383	0.486687	-0.00306435
chr1_228745976_228746149	chr1_228746013_228746034	AAAGCCTACAGCACCCGGTATT	24	22	317498	minus	0.740596	0.569945	0.724965	chr1_228746013_228746034	chr1_228746013_228746034	1522.74	0.0143324	0.0913186	0.0232868	0.878714	0.962714	0.600465	-0.045449	0.00170626	-0.271402	0.497741	-0.00281746
chr1_228745976_228746149	chr1_228746013_228746035	AAAGCCTACAGCACCCGGTATTC	24	23	424962	minus	0.729725	0.660853	0.729725	chr1_228746013_228746035	chr1_228746013_228746035	2039.93	0.141854	0.100292	1.87729	0.170642	0.520496	0.567603	-0.054311	0.00348905	-0.27736	0.569654	-0.00261034
chr1_228745976_228746149	chr1_228746013_228746036	AAAGCCTACAGCACCCGGTATTCC	24	24	268333	minus	0.668048	0.640611	0.668048	chr1_228746013_228746036	chr1_228746013_228746036	1295.41	0.0843475	0.0942808	0.754993	0.3849	0.730267	0.439096	0.0690895	0.000491349	-0.311923	0.808764	-0.00102705
chr1_228745976_228746149	chr1_228746013_228746037	AAAGCCTACAGCACCCGGTATTCCC	23	25	251449	minus	0.526027	0.453734	0.526027	chr1_228746013_228746037	chr1_228746013_228746037	1190.55	0.0672796	0.108108	0.356656	0.55037	0.825716	0.542895	0.0623673	0.00255377	-0.310177	0.69359	-0.00190928
chr1_228745976_228746149	chr1_228746014_228746030	AAGCCTACAGCACCCGG	28	17	130765	minus	0.628066	0.26571	0.625197	chr1_228746014_228746030	chr1_228746014_228746030	592.203	0.150692	0.162711	0.847901	0.357147	0.712394	0.0465632	-0.313318	0.335454	-0.149255	0.14143	-0.0107651
chr1_228745976_228746149	chr1_228746014_228746031	AAGCCTACAGCACCCGGT	27	18	310788	minus	0.644164	0.415717	0.641225	chr1_228746014_228746031	chr1_228746014_228746031	1428.69	0.36819	0.13252	7.42951	0.00641629	0.0980346	0.0379325	-0.265667	0.295231	-0.131645	0.0727118	-0.0106505
chr1_228745976_228746149	chr1_228746014_228746032	AAGCCTACAGCACCCGGTA	27	19	449980	minus	0.675163	0.501787	0.674143	chr1_228746014_228746032	chr1_228746014_228746032	2127.34	0.217539	0.0943377	5.13841	0.023402	0.195538	0.0753028	-0.16029	0.0266328	-0.198107	0.12918	-0.00645905
chr1_228745976_228746149	chr1_228746014_228746033	AAGCCTACAGCACCCGGTAT	27	20	378818	minus	0.731113	0.650774	0.628579	chr1_228746014_228746033	chr1_228746014_228746033	1807.53	0.207487	0.0922568	4.81979	0.0281347	0.213857	0.202842	-0.111796	0.00180359	-0.272085	0.246595	-0.00483447
chr1_228745976_228746149	chr1_228746014_228746034	AAGCCTACAGCACCCGGTATT	27	21	165529	minus	0.579075	0.46527	0.54446	chr1_228746014_228746034	chr1_228746014_228746034	787.856	-0.056845	0.0903807	0.380194	0.537499	0.819622	0.673273	-0.0361455	0.00241188	-0.259857	0.494196	-0.00275889
chr1_228745976_228746149	chr1_228746014_228746035	AAGCCTACAGCACCCGGTATTC	27	22	455255	minus	0.722317	0.659453	0.606435	chr1_228746014_228746035	chr1_228746014_228746035	2184.11	0.147492	0.0929368	2.38092	0.122825	0.452738	0.995061	0.000545732	0.000939546	-0.290803	0.766466	-0.00125557
chr1_228745976_228746149	chr1_228746014_228746036	AAGCCTACAGCACCCGGTATTCC	27	23	284581	minus	0.645101	0.633093	0.645101	chr1_228746014_228746036	chr1_228746014_228746036	1380.39	0.040938	0.0872628	0.209632	0.647056	0.867884	0.485792	0.0574248	0.000396011	-0.292616	0.487928	0.00270198
chr1_228745976_228746149	chr1_228746014_228746037	AAGCCTACAGCACCCGGTATTCCC	25	24	259243	minus	0.541253	0.481968	0.429691	chr1_228746014_228746037	chr1_228746014_228746037	1239.29	-0.0244276	0.100141	0.0551819	0.81428	0.939824	0.0650133	0.17459	0.00281276	-0.283606	0.790181	0.00116836
chr1_228745976_228746149	chr1_228746014_228746038	AAGCCTACAGCACCCGGTATTCCCA	24	25	97469	minus	0.533993	0.382829	0.431543	chr1_228746014_228746038	chr1_228746014_228746038	459.6	-0.0174561	0.108438	0.0245125	0.875588	0.962035	0.630778	0.0495035	0.00148456	-0.326933	0.607728	-0.00248132
chr1_228745976_228746149	chr1_228746015_228746035	AGCCTACAGCACCCGGTATTC	28	21	85451	minus	0.595811	0.507577	0.579478	chr1_228746015_228746035	chr1_228746015_228746035	421.269	0.320183	0.112316	7.53134	0.00606347	0.0958256	0.983152	0.0022542	0.00376912	-0.307591	0.869395	0.000834571
chr1_228745976_228746149	chr1_228746015_228746036	AGCCTACAGCACCCGGTATTCC	28	22	119769	minus	0.30088	0.236698	0.243799	chr1_228746015_228746036	chr1_228746015_228746036	634.79	0.255503	0.143977	2.96891	0.0848788	0.375494	0.123696	0.210693	0.0461105	-0.272516	0.117617	0.00986583
chr1_228745976_228746149	chr1_228746015_228746037	AGCCTACAGCACCCGGTATTCCC	26	23	94985	minus	0.49824	0.501023	0.449677	chr1_228746015_228746037	chr1_228746015_228746037	476.81	0.1672	0.111407	2.12272	0.145128	0.486039	0.120427	0.163785	0.00230866	-0.321539	0.142163	0.00735432
chr1_228748247_228748390	chr1_228748254_228748271	AAAGCCTACAGCACCCGG	25	18	252593	minus	0.829446	0.48389	0.756879	chr1_228748254_228748271	chr1_228748254_228748271	1159.35	0.186466	0.12865	2.05956	0.151254	0.494665	0.00733315	-0.332384	0.300055	-0.126714	0.0454596	-0.011658
chr1_228748247_228748390	chr1_228748254_228748272	AAAGCCTACAGCACCCGGT	24	19	470606	minus	0.754514	0.6135	0.753218	chr1_228748254_228748272	chr1_228748254_228748272	2210.25	0.257731	0.100976	6.27678	0.012233	0.137694	0.0432449	-0.195738	0.0543092	-0.184257	0.0544346	-0.00879444
chr1_228748247_228748390	chr1_228748254_228748273	AAAGCCTACAGCACCCGGTA	24	20	589955	minus	0.655495	0.564701	0.655294	chr1_228748254_228748273	chr1_228748254_228748273	2868.77	0.125149	0.0831711	2.18145	0.139683	0.482132	0.412753	-0.0647471	0.00415777	-0.226069	0.495555	-0.00257541
chr1_228748247_228748390	chr1_228748254_228748274	AAAGCCTACAGCACCCGGTAT	24	21	396600	minus	0.648795	0.606887	0.643892	chr1_228748254_228748274	chr1_228748254_228748274	1916.84	0.158469	0.0966912	2.54971	0.110315	0.429152	0.455043	-0.0686128	0.00295949	-0.272383	0.486687	-0.00306435
chr1_228748247_228748390	chr1_228748254_228748275	AAAGCCTACAGCACCCGGTATT	24	22	317498	minus	0.740596	0.569945	0.724965	chr1_228748254_228748275	chr1_228748254_228748275	1522.74	0.0143324	0.0913186	0.0232868	0.878714	0.962714	0.600465	-0.045449	0.00170626	-0.271402	0.497741	-0.00281746
chr1_228748247_228748390	chr1_228748254_228748276	AAAGCCTACAGCACCCGGTATTC	24	23	424962	minus	0.729725	0.660853	0.729725	chr1_228748254_228748276	chr1_228748254_228748276	2039.93	0.141854	0.100292	1.87729	0.170642	0.520496	0.567603	-0.054311	0.00348905	-0.27736	0.569654	-0.00261034
chr1_228748247_228748390	chr1_228748254_228748277	AAAGCCTACAGCACCCGGTATTCC	24	24	268333	minus	0.668048	0.640611	0.668048	chr1_228748254_228748277	chr1_228748254_228748277	1295.41	0.0843475	0.0942808	0.754993	0.3849	0.730267	0.439096	0.0690895	0.000491349	-0.311923	0.808764	-0.00102705
chr1_228748247_228748390	chr1_228748254_228748278	AAAGCCTACAGCACCCGGTATTCCC	23	25	251449	minus	0.526027	0.453734	0.526027	chr1_228748254_228748278	chr1_228748254_228748278	1190.55	0.0672796	0.108108	0.356656	0.55037	0.825716	0.542895	0.0623673	0.00255377	-0.310177	0.69359	-0.00190928
chr1_228748247_228748390	chr1_228748255_228748271	AAGCCTACAGCACCCGG	28	17	130765	minus	0.628066	0.26571	0.625197	chr1_228748255_228748271	chr1_228748255_228748271	592.203	0.150692	0.162711	0.847901	0.357147	0.712394	0.0465632	-0.313318	0.335454	-0.149255	0.14143	-0.0107651
chr1_228748247_228748390	chr1_228748255_228748272	AAGCCTACAGCACCCGGT	27	18	310788	minus	0.644164	0.415717	0.641225	chr1_228748255_228748272	chr1_228748255_228748272	1428.69	0.36819	0.13252	7.42951	0.00641629	0.0980346	0.0379325	-0.265667	0.295231	-0.131645	0.0727118	-0.0106505
chr1_228748247_228748390	chr1_228748255_228748273	AAGCCTACAGCACCCGGTA	27	19	449980	minus	0.675163	0.501787	0.674143	chr1_228748255_228748273	chr1_228748255_228748273	2127.34	0.217539	0.0943377	5.13841	0.023402	0.195538	0.0753028	-0.16029	0.0266328	-0.198107	0.12918	-0.00645905
chr1_228748247_228748390	chr1_228748255_228748274	AAGCCTACAGCACCCGGTAT	27	20	378818	minus	0.731113	0.650774	0.628579	chr1_228748255_228748274	chr1_228748255_228748274	1807.53	0.207487	0.0922568	4.81979	0.0281347	0.213857	0.202842	-0.111796	0.00180359	-0.272085	0.246595	-0.00483447
chr1_228748247_228748390	chr1_228748255_228748275	AAGCCTACAGCACCCGGTATT	27	21	165529	minus	0.579075	0.46527	0.54446	chr1_228748255_228748275	chr1_228748255_228748275	787.856	-0.056845	0.0903807	0.380194	0.537499	0.819622	0.673273	-0.0361455	0.00241188	-0.259857	0.494196	-0.00275889
chr1_228748247_228748390	chr1_228748255_228748276	AAGCCTACAGCACCCGGTATTC	27	22	455255	minus	0.722317	0.659453	0.606435	chr1_228748255_228748276	chr1_228748255_228748276	2184.11	0.147492	0.0929368	2.38092	0.122825	0.452738	0.995061	0.000545732	0.000939546	-0.290803	0.766466	-0.00125557
chr1_228748247_228748390	chr1_228748255_228748277	AAGCCTACAGCACCCGGTATTCC	27	23	284581	minus	0.645101	0.633093	0.645101	chr1_228748255_228748277	chr1_228748255_228748277	1380.39	0.040938	0.0872628	0.209632	0.647056	0.867884	0.485792	0.0574248	0.000396011	-0.292616	0.487928	0.00270198
chr1_228748247_228748390	chr1_228748255_228748278	AAGCCTACAGCACCCGGTATTCCC	25	24	259243	minus	0.541253	0.481968	0.429691	chr1_228748255_228748278	chr1_228748255_228748278	1239.29	-0.0244276	0.100141	0.0551819	0.81428	0.939824	0.0650133	0.17459	0.00281276	-0.283606	0.790181	0.00116836
chr1_228748247_228748390	chr1_228748255_228748279	AAGCCTACAGCACCCGGTATTCCCA	24	25	97469	minus	0.533993	0.382829	0.431543	chr1_228748255_228748279	chr1_228748255_228748279	459.6	-0.0174561	0.108438	0.0245125	0.875588	0.962035	0.630778	0.0495035	0.00148456	-0.326933	0.607728	-0.00248132
chr1_228748247_228748390	chr1_228748256_228748276	AGCCTACAGCACCCGGTATTC	28	21	85451	minus	0.595811	0.507577	0.579478	chr1_228748256_228748276	chr1_228748256_228748276	421.269	0.320183	0.112316	7.53134	0.00606347	0.0958256	0.983152	0.0022542	0.00376912	-0.307591	0.869395	0.000834571
chr1_228748247_228748390	chr1_228748256_228748277	AGCCTACAGCACCCGGTATTCC	28	22	119769	minus	0.30088	0.236698	0.243799	chr1_228748256_228748277	chr1_228748256_228748277	634.79	0.255503	0.143977	2.96891	0.0848788	0.375494	0.123696	0.210693	0.0461105	-0.272516	0.117617	0.00986583
chr1_228748247_228748390	chr1_228748256_228748278	AGCCTACAGCACCCGGTATTCCC	26	23	94985	minus	0.49824	0.501023	0.449677	chr1_228748256_228748278	chr1_228748256_228748278	476.81	0.1672	0.111407	2.12272	0.145128	0.486039	0.120427	0.163785	0.00230866	-0.321539	0.142163	0.00735432
chr1_228750488_228750654	chr1_228750495_228750512	AAAGCCTACAGCACCCGG	25	18	252593	minus	0.829446	0.48389	0.756879	chr1_228750495_228750512	chr1_228750495_228750512	1159.35	0.186466	0.12865	2.05956	0.151254	0.494665	0.00733315	-0.332384	0.300055	-0.126714	0.0454596	-0.011658
chr1_228750488_228750654	chr1_228750495_228750513	AAAGCCTACAGCACCCGGT	24	19	470606	minus	0.754514	0.6135	0.753218	chr1_228750495_228750513	chr1_228750495_228750513	2210.25	0.257731	0.100976	6.27678	0.012233	0.137694	0.0432449	-0.195738	0.0543092	-0.184257	0.0544346	-0.00879444
chr1_228750488_228750654	chr1_228750495_228750514	AAAGCCTACAGCACCCGGTA	24	20	589955	minus	0.655495	0.564701	0.655294	chr1_228750495_228750514	chr1_228750495_228750514	2868.77	0.125149	0.0831711	2.18145	0.139683	0.482132	0.412753	-0.0647471	0.00415777	-0.226069	0.495555	-0.00257541
chr1_228750488_228750654	chr1_228750495_228750515	AAAGCCTACAGCACCCGGTAT	24	21	396600	minus	0.648795	0.606887	0.643892	chr1_228750495_228750515	chr1_228750495_228750515	1916.84	0.158469	0.0966912	2.54971	0.110315	0.429152	0.455043	-0.0686128	0.00295949	-0.272383	0.486687	-0.00306435
chr1_228750488_228750654	chr1_228750495_228750516	AAAGCCTACAGCACCCGGTATT	24	22	317498	minus	0.740596	0.569945	0.724965	chr1_228750495_228750516	chr1_228750495_228750516	1522.74	0.0143324	0.0913186	0.0232868	0.878714	0.962714	0.600465	-0.045449	0.00170626	-0.271402	0.497741	-0.00281746
chr1_228750488_228750654	chr1_228750495_228750517	AAAGCCTACAGCACCCGGTATTC	24	23	424962	minus	0.729725	0.660853	0.729725	chr1_228750495_228750517	chr1_228750495_228750517	2039.93	0.141854	0.100292	1.87729	0.170642	0.520496	0.567603	-0.054311	0.00348905	-0.27736	0.569654	-0.00261034
chr1_228750488_228750654	chr1_228750495_228750518	AAAGCCTACAGCACCCGGTATTCC	24	24	268333	minus	0.668048	0.640611	0.668048	chr1_228750495_228750518	chr1_228750495_228750518	1295.41	0.0843475	0.0942808	0.754993	0.3849	0.730267	0.439096	0.0690895	0.000491349	-0.311923	0.808764	-0.00102705
chr1_228750488_228750654	chr1_228750495_228750519	AAAGCCTACAGCACCCGGTATTCCC	23	25	251449	minus	0.526027	0.453734	0.526027	chr1_228750495_228750519	chr1_228750495_228750519	1190.55	0.0672796	0.108108	0.356656	0.55037	0.825716	0.542895	0.0623673	0.00255377	-0.310177	0.69359	-0.00190928
chr1_228750488_228750654	chr1_228750496_228750512	AAGCCTACAGCACCCGG	28	17	130765	minus	0.628066	0.26571	0.625197	chr1_228750496_228750512	chr1_228750496_228750512	592.203	0.150692	0.162711	0.847901	0.357147	0.712394	0.0465632	-0.313318	0.335454	-0.149255	0.14143	-0.0107651
chr1_228750488_228750654	chr1_228750496_228750513	AAGCCTACAGCACCCGGT	27	18	310788	minus	0.644164	0.415717	0.641225	chr1_228750496_228750513	chr1_228750496_228750513	1428.69	0.36819	0.13252	7.42951	0.00641629	0.0980346	0.0379325	-0.265667	0.295231	-0.131645	0.0727118	-0.0106505
chr1_228750488_228750654	chr1_228750496_228750514	AAGCCTACAGCACCCGGTA	27	19	449980	minus	0.675163	0.501787	0.674143	chr1_228750496_228750514	chr1_228750496_228750514	2127.34	0.217539	0.0943377	5.13841	0.023402	0.195538	0.0753028	-0.16029	0.0266328	-0.198107	0.12918	-0.00645905
chr1_228750488_228750654	chr1_228750496_228750515	AAGCCTACAGCACCCGGTAT	27	20	378818	minus	0.731113	0.650774	0.628579	chr1_228750496_228750515	chr1_228750496_228750515	1807.53	0.207487	0.0922568	4.81979	0.0281347	0.213857	0.202842	-0.111796	0.00180359	-0.272085	0.246595	-0.00483447
chr1_228750488_228750654	chr1_228750496_228750516	AAGCCTACAGCACCCGGTATT	27	21	165529	minus	0.579075	0.46527	0.54446	chr1_228750496_228750516	chr1_228750496_228750516	787.856	-0.056845	0.0903807	0.380194	0.537499	0.819622	0.673273	-0.0361455	0.00241188	-0.259857	0.494196	-0.00275889
chr1_228750488_228750654	chr1_228750496_228750517	AAGCCTACAGCACCCGGTATTC	27	22	455255	minus	0.722317	0.659453	0.606435	chr1_228750496_228750517	chr1_228750496_228750517	2184.11	0.147492	0.0929368	2.38092	0.122825	0.452738	0.995061	0.000545732	0.000939546	-0.290803	0.766466	-0.00125557
chr1_228750488_228750654	chr1_228750496_228750518	AAGCCTACAGCACCCGGTATTCC	27	23	284581	minus	0.645101	0.633093	0.645101	chr1_228750496_228750518	chr1_228750496_228750518	1380.39	0.040938	0.0872628	0.209632	0.647056	0.867884	0.485792	0.0574248	0.000396011	-0.292616	0.487928	0.00270198
chr1_228750488_228750654	chr1_228750496_228750519	AAGCCTACAGCACCCGGTATTCCC	25	24	259243	minus	0.541253	0.481968	0.429691	chr1_228750496_228750519	chr1_228750496_228750519	1239.29	-0.0244276	0.100141	0.0551819	0.81428	0.939824	0.0650133	0.17459	0.00281276	-0.283606	0.790181	0.00116836
chr1_228750488_228750654	chr1_228750496_228750520	AAGCCTACAGCACCCGGTATTCCCA	24	25	97469	minus	0.533993	0.382829	0.431543	chr1_228750496_228750520	chr1_228750496_228750520	459.6	-0.0174561	0.108438	0.0245125	0.875588	0.962035	0.630778	0.0495035	0.00148456	-0.326933	0.607728	-0.00248132
chr1_228750488_228750654	chr1_228750497_228750517	AGCCTACAGCACCCGGTATTC	28	21	85451	minus	0.595811	0.507577	0.579478	chr1_228750497_228750517	chr1_228750497_228750517	421.269	0.320183	0.112316	7.53134	0.00606347	0.0958256	0.983152	0.0022542	0.00376912	-0.307591	0.869395	0.000834571
chr1_228750488_228750654	chr1_228750497_228750518	AGCCTACAGCACCCGGTATTCC	28	22	119769	minus	0.30088	0.236698	0.243799	chr1_228750497_228750518	chr1_228750497_228750518	634.79	0.255503	0.143977	2.96891	0.0848788	0.375494	0.123696	0.210693	0.0461105	-0.272516	0.117617	0.00986583
chr1_228750488_228750654	chr1_228750497_228750519	AGCCTACAGCACCCGGTATTCCC	26	23	94985	minus	0.49824	0.501023	0.449677	chr1_228750497_228750519	chr1_228750497_228750519	476.81	0.1672	0.111407	2.12272	0.145128	0.486039	0.120427	0.163785	0.00230866	-0.321539	0.142163	0.00735432
chr1_228752729_228752872	chr1_228752736_228752753	AAAGCCTACAGCACCCGG	25	18	252593	minus	0.829446	0.48389	0.756879	chr1_228752736_228752753	chr1_228752736_228752753	1159.35	0.186466	0.12865	2.05956	0.151254	0.494665	0.00733315	-0.332384	0.300055	-0.126714	0.0454596	-0.011658
chr1_228752729_228752872	chr1_228752736_228752754	AAAGCCTACAGCACCCGGT	24	19	470606	minus	0.754514	0.6135	0.753218	chr1_228752736_228752754	chr1_228752736_228752754	2210.25	0.257731	0.100976	6.27678	0.012233	0.137694	0.0432449	-0.195738	0.0543092	-0.184257	0.0544346	-0.00879444
chr1_228752729_228752872	chr1_228752736_228752755	AAAGCCTACAGCACCCGGTA	24	20	589955	minus	0.655495	0.564701	0.655294	chr1_228752736_228752755	chr1_228752736_228752755	2868.77	0.125149	0.0831711	2.18145	0.139683	0.482132	0.412753	-0.0647471	0.00415777	-0.226069	0.495555	-0.00257541
chr1_228752729_228752872	chr1_228752736_228752756	AAAGCCTACAGCACCCGGTAT	24	21	396600	minus	0.648795	0.606887	0.643892	chr1_228752736_228752756	chr1_228752736_228752756	1916.84	0.158469	0.0966912	2.54971	0.110315	0.429152	0.455043	-0.0686128	0.00295949	-0.272383	0.486687	-0.00306435
chr1_228752729_228752872	chr1_228752736_228752757	AAAGCCTACAGCACCCGGTATT	24	22	317498	minus	0.740596	0.569945	0.724965	chr1_228752736_228752757	chr1_228752736_228752757	1522.74	0.0143324	0.0913186	0.0232868	0.878714	0.962714	0.600465	-0.045449	0.00170626	-0.271402	0.497741	-0.00281746
chr1_228752729_228752872	chr1_228752736_228752758	AAAGCCTACAGCACCCGGTATTC	24	23	424962	minus	0.729725	0.660853	0.729725	chr1_228752736_228752758	chr1_228752736_228752758	2039.93	0.141854	0.100292	1.87729	0.170642	0.520496	0.567603	-0.054311	0.00348905	-0.27736	0.569654	-0.00261034
chr1_228752729_228752872	chr1_228752736_228752759	AAAGCCTACAGCACCCGGTATTCC	24	24	268333	minus	0.668048	0.640611	0.668048	chr1_228752736_228752759	chr1_228752736_228752759	1295.41	0.0843475	0.0942808	0.754993	0.3849	0.730267	0.439096	0.0690895	0.000491349	-0.311923	0.808764	-0.00102705
chr1_228752729_228752872	chr1_228752736_228752760	AAAGCCTACAGCACCCGGTATTCCC	23	25	251449	minus	0.526027	0.453734	0.526027	chr1_228752736_228752760	chr1_228752736_228752760	1190.55	0.0672796	0.108108	0.356656	0.55037	0.825716	0.542895	0.0623673	0.00255377	-0.310177	0.69359	-0.00190928
chr1_228752729_228752872	chr1_228752737_228752753	AAGCCTACAGCACCCGG	28	17	130765	minus	0.628066	0.26571	0.625197	chr1_228752737_228752753	chr1_228752737_228752753	592.203	0.150692	0.162711	0.847901	0.357147	0.712394	0.0465632	-0.313318	0.335454	-0.149255	0.14143	-0.0107651
chr1_228752729_228752872	chr1_228752737_228752754	AAGCCTACAGCACCCGGT	27	18	310788	minus	0.644164	0.415717	0.641225	chr1_228752737_228752754	chr1_228752737_228752754	1428.69	0.36819	0.13252	7.42951	0.00641629	0.0980346	0.0379325	-0.265667	0.295231	-0.131645	0.0727118	-0.0106505
chr1_228752729_228752872	chr1_228752737_228752755	AAGCCTACAGCACCCGGTA	27	19	449980	minus	0.675163	0.501787	0.674143	chr1_228752737_228752755	chr1_228752737_228752755	2127.34	0.217539	0.0943377	5.13841	0.023402	0.195538	0.0753028	-0.16029	0.0266328	-0.198107	0.12918	-0.00645905
chr1_228752729_228752872	chr1_228752737_228752756	AAGCCTACAGCACCCGGTAT	27	20	378818	minus	0.731113	0.650774	0.628579	chr1_228752737_228752756	chr1_228752737_228752756	1807.53	0.207487	0.0922568	4.81979	0.0281347	0.213857	0.202842	-0.111796	0.00180359	-0.272085	0.246595	-0.00483447
chr1_228752729_228752872	chr1_228752737_228752757	AAGCCTACAGCACCCGGTATT	27	21	165529	minus	0.579075	0.46527	0.54446	chr1_228752737_228752757	chr1_228752737_228752757	787.856	-0.056845	0.0903807	0.380194	0.537499	0.819622	0.673273	-0.0361455	0.00241188	-0.259857	0.494196	-0.00275889
chr1_228752729_228752872	chr1_228752737_228752758	AAGCCTACAGCACCCGGTATTC	27	22	455255	minus	0.722317	0.659453	0.606435	chr1_228752737_228752758	chr1_228752737_228752758	2184.11	0.147492	0.0929368	2.38092	0.122825	0.452738	0.995061	0.000545732	0.000939546	-0.290803	0.766466	-0.00125557
chr1_228752729_228752872	chr1_228752737_228752759	AAGCCTACAGCACCCGGTATTCC	27	23	284581	minus	0.645101	0.633093	0.645101	chr1_228752737_228752759	chr1_228752737_228752759	1380.39	0.040938	0.0872628	0.209632	0.647056	0.867884	0.485792	0.0574248	0.000396011	-0.292616	0.487928	0.00270198
chr1_228752729_228752872	chr1_228752737_228752760	AAGCCTACAGCACCCGGTATTCCC	25	24	259243	minus	0.541253	0.481968	0.429691	chr1_228752737_228752760	chr1_228752737_228752760	1239.29	-0.0244276	0.100141	0.0551819	0.81428	0.939824	0.0650133	0.17459	0.00281276	-0.283606	0.790181	0.00116836
chr1_228752729_228752872	chr1_228752737_228752761	AAGCCTACAGCACCCGGTATTCCCA	24	25	97469	minus	0.533993	0.382829	0.431543	chr1_228752737_228752761	chr1_228752737_228752761	459.6	-0.0174561	0.108438	0.0245125	0.875588	0.962035	0.630778	0.0495035	0.00148456	-0.326933	0.607728	-0.00248132
chr1_228752729_228752872	chr1_228752738_228752758	AGCCTACAGCACCCGGTATTC	28	21	85451	minus	0.595811	0.507577	0.579478	chr1_228752738_228752758	chr1_228752738_228752758	421.269	0.320183	0.112316	7.53134	0.00606347	0.0958256	0.983152	0.0022542	0.00376912	-0.307591	0.869395	0.000834571
chr1_228752729_228752872	chr1_228752738_228752759	AGCCTACAGCACCCGGTATTCC	28	22	119769	minus	0.30088	0.236698	0.243799	chr1_228752738_228752759	chr1_228752738_228752759	634.79	0.255503	0.143977	2.96891	0.0848788	0.375494	0.123696	0.210693	0.0461105	-0.272516	0.117617	0.00986583
chr1_228752729_228752872	chr1_228752738_228752760	AGCCTACAGCACCCGGTATTCCC	26	23	94985	minus	0.49824	0.501023	0.449677	chr1_228752738_228752760	chr1_228752738_228752760	476.81	0.1672	0.111407	2.12272	0.145128	0.486039	0.120427	0.163785	0.00230866	-0.321539	0.142163	0.00735432
chr1_228754962_228755113	chr1_228754977_228754994	AAAGCCTACAGCACCCGG	25	18	252593	minus	0.829446	0.48389	0.756879	chr1_228754977_228754994	chr1_228754977_228754994	1159.35	0.186466	0.12865	2.05956	0.151254	0.494665	0.00733315	-0.332384	0.300055	-0.126714	0.0454596	-0.011658
chr1_228754962_228755113	chr1_228754977_228754995	AAAGCCTACAGCACCCGGT	24	19	470606	minus	0.754514	0.6135	0.753218	chr1_228754977_228754995	chr1_228754977_228754995	2210.25	0.257731	0.100976	6.27678	0.012233	0.137694	0.0432449	-0.195738	0.0543092	-0.184257	0.0544346	-0.00879444
chr1_228754962_228755113	chr1_228754977_228754996	AAAGCCTACAGCACCCGGTA	24	20	589955	minus	0.655495	0.564701	0.655294	chr1_228754977_228754996	chr1_228754977_228754996	2868.77	0.125149	0.0831711	2.18145	0.139683	0.482132	0.412753	-0.0647471	0.00415777	-0.226069	0.495555	-0.00257541
chr1_228754962_228755113	chr1_228754977_228754997	AAAGCCTACAGCACCCGGTAT	24	21	396600	minus	0.648795	0.606887	0.643892	chr1_228754977_228754997	chr1_228754977_228754997	1916.84	0.158469	0.0966912	2.54971	0.110315	0.429152	0.455043	-0.0686128	0.00295949	-0.272383	0.486687	-0.00306435
chr1_228754962_228755113	chr1_228754977_228754998	AAAGCCTACAGCACCCGGTATT	24	22	317498	minus	0.740596	0.569945	0.724965	chr1_228754977_228754998	chr1_228754977_228754998	1522.74	0.0143324	0.0913186	0.0232868	0.878714	0.962714	0.600465	-0.045449	0.00170626	-0.271402	0.497741	-0.00281746
chr1_228754962_228755113	chr1_228754977_228754999	AAAGCCTACAGCACCCGGTATTC	24	23	424962	minus	0.729725	0.660853	0.729725	chr1_228754977_228754999	chr1_228754977_228754999	2039.93	0.141854	0.100292	1.87729	0.170642	0.520496	0.567603	-0.054311	0.00348905	-0.27736	0.569654	-0.00261034
chr1_228754962_228755113	chr1_228754977_228755000	AAAGCCTACAGCACCCGGTATTCC	24	24	268333	minus	0.668048	0.640611	0.668048	chr1_228754977_228755000	chr1_228754977_228755000	1295.41	0.0843475	0.0942808	0.754993	0.3849	0.730267	0.439096	0.0690895	0.000491349	-0.311923	0.808764	-0.00102705
[truncated: 11,558 more rows]
